# Supplementary material
Source: publisher figshare collection journal article supplement (https://gsapubs.figshare.com/articles/dataset/_/21326094)
Supplement: Supplementary file 1 [file 1]

Zhang, P., Jiang, S.Y., Donelick, R.A., Li, R., Soares, C.J., and Mei, L., 2022, Frontal expansion of an accretionary wedge under highly oblique plate convergence: Southern Indo-Burman Ranges, Myanmar: GSA Bulletin, <https://doi.org/10.1130/B36560.1>.

## Supplemental Material

### **Supplemental Material A. Field Investigation and Subsurface Data**

Text S1. Summary of the criteria for folds and thrusts observed along the Pyay–Toungup Section

Fig. S1. Geological map of the Pyay-Kyaukpyu Section and field observations

Fig. S2. Summary of the paleontological data in the study area.

Fig. S3. Uninterpreted seismic reflection sections (offshore region, southern Indo-Burman Ranges)

### **Supplemental Material B. Analytical Methods**

Text S2. Zircon U-Pb dating

Text S3. Apatite fission track analysis

### **Supplemental Material C. Full Results**

Table S1. GPS coordinates and lithologies of surface samples from the study area

Table S2. Detrital zircon U-Pb ages

Table S3. Apatite fission track results

### **Supplemental Material D. Compiled Detrital Zircon U-Pb Data**

Fig. S4. Extensive detrital zircon U-Pb data summary with MDS plot.

Table S4. Summarized detrital zircon U-Pb ages from western Myanmar and adjacent regions

# Frontal expansion of an accretionary wedge under highly oblique plate convergence: Southern Indo-Burman Ranges, Myanmar

Peng Zhang<sup>1,2,\*</sup>, Shao-Yong Jiang<sup>1</sup>, Raymond A. Donelick<sup>3</sup>, Renyuan Li<sup>4</sup>, Cleber J. Soares<sup>5</sup>, and Lianfu Mei<sup>2</sup>

<sup>1</sup>State Key Laboratory of Geological Processes and Mineral Resources, Collaborative Innovation Center for Exploration of Strategic Mineral Resources, China University of Geosciences, Wuhan 430074, China

<sup>2</sup>Key Laboratory of Tectonics and Petroleum Resources (China University of Geosciences), Ministry of Education, Wuhan 430074, China

<sup>3</sup>Apatite.com Partners, LLC1075, Matson Road Viola, Idaho 83872-9709, United States

<sup>4</sup>International Limited, China National Offshore Oil Corporation, Beijing 10027, China

<sup>5</sup>ChronusCamp Research, São Paulo State 13974-160, Brazil

\*Corresponding author at: State Key Laboratory of Geological Processes and Mineral Resources, Collaborative Innovation Center for Exploration of Strategic Mineral Resources, China University of Geosciences, Wuhan 430074, China

Email address: P. Zhang (p8.zhang@cug.edu.cn)

---

## Supplemental Material A. Field Investigation and Subsurface Data

Text S1. Summary of the criteria for folds and thrusts observed along the Pyay–Toungup Section

Fig. S1. Geological map of the Pyay-Kyaukpyu Section and field observations

Fig. S2. Summary of the paleontological data in the study area.

Fig. S3. Uninterpreted seismic reflection sections (offshore region, southern Indo-Burman Ranges)

## Supplemental Material B. Analytical Methods

Text S2. Zircon U-Pb dating

Text S3. Apatite fission track analysis

## Supplemental Material C. Full Results

Table S1. GPS coordinates and lithologies of surface samples from the study area

Table S2. Detrital zircon U-Pb ages

Table S3. Apatite fission track results

## Supplemental Material D. Compiled Detrital Zircon U-Pb Data

Fig. S4. Extensive detrital zircon U-Pb data summary with MDS plot.

Table S4. Summarized detrital zircon U-Pb ages from western Myanmar and adjacent regions

## Supplemental Material A. Field Investigation and Subsurface Data

**Text S1.** Summary of the criteria for folds and thrusts observed and measured in the study area

| Section | Description                                                                                                                                                                                                                                                                                                                                                                                                                                                                                                                                                                                                                                                                                                                                                                                                       | Structure type                                                                                                                                                                                                                                                                                    | Horizontal offset of major thrust (km) |                   |                   |                   |                   |                   | Amount of shortening of major folds (km) |                   |                   |                   | Subtotal (km)                                                                         |
|---------|-------------------------------------------------------------------------------------------------------------------------------------------------------------------------------------------------------------------------------------------------------------------------------------------------------------------------------------------------------------------------------------------------------------------------------------------------------------------------------------------------------------------------------------------------------------------------------------------------------------------------------------------------------------------------------------------------------------------------------------------------------------------------------------------------------------------|---------------------------------------------------------------------------------------------------------------------------------------------------------------------------------------------------------------------------------------------------------------------------------------------------|----------------------------------------|-------------------|-------------------|-------------------|-------------------|-------------------|------------------------------------------|-------------------|-------------------|-------------------|---------------------------------------------------------------------------------------|
|         |                                                                                                                                                                                                                                                                                                                                                                                                                                                                                                                                                                                                                                                                                                                                                                                                                   |                                                                                                                                                                                                                                                                                                   | $f_{Kabaw}$                            | $f_{FA1}$         | $f_{FA2}$         | $f_{FA3}$         | $f_{FA4}$         |                   | $A_{fa1}$                                |                   |                   |                   |                                                                                       |
| FA1     | Western flank of the southern Minbu synclinorium, bounded on forelimb by the east-dipping Kabaw Fault. The westernmost part of the synclinorium was characterized by a small-scale anticlinorium with a width ca. 2 km; the lower Eocene red shales constituted its core. The overlying lower-mid Eocene shale and interbedded sandstone beds were cut through by the east-dipping thrusts ( $f_{FA1}$ - $f_{FA4}$ ).                                                                                                                                                                                                                                                                                                                                                                                             | Synclinal monocline                                                                                                                                                                                                                                                                               | Undefined                              | 0.13              | 0.27              | 0.27              | 0.27              |                   | 1.20                                     |                   |                   |                   | 2.14                                                                                  |
| P1      | P1 cross section covers the ‘oldest’ part of the southern Indo-Burman Ranges that was originally interpreted as sediments of the Upper Cretaceous (BESRD, 1977). However, our new presented detrital zircon U-Pb ages provide a maximum depositional age of 50 Ma (Najman et al., 2020; this study), suggesting that these sediments were deposited in the early-middle Eocene. However, we cannot rule out the possibility that this may simply be the result of a data gap. The lower-middle Eocene shale beds and interbedded sandstone layers as well as the upper Eocene sandstone beds were west-vergent and cut through by the east-dipping thrusts. Overturned synclines were observed.<br><br>It was estimated that at least 1.7 km sediments have been eroded from western flank of the anticline Ap11. | <b>Ap11</b> —simple anticline;<br><b>Ap12</b> —anticlinorium, the east limb was a syncline (1.5 km);<br><b>Ap13</b> —fault-related anticlinorium, the forelimb was a syncline (1.0 km);<br><b>Ap14</b> —faulted related anticlinorium, the forelimb was a syncline (1.0 km)                       | $f_{P11}$<br>Undefined                 | $f_{P12}$<br>0.13 | $f_{P13}$<br>0.27 | $f_{P14}$<br>0.40 | $f_{P15}$<br>0.27 | $f_{P16}$<br>0.20 | $A_{p11}$<br>0.26                        | $A_{p12}$<br>0.67 | $A_{p13}$<br>1.33 | $A_{p14}$<br>1.34 | 5.60<br>(This includes shortening values estimated for the tiled strata about 1.2 km) |
| P2      | P2 section covers the region where the lower-middle Eocene sediments constitute the footwall of the Kheng Fault. This section is characterized by fault-related folds; forelimbs of these folds are often terminated against the east-dipping thrust. The crest parts of the anticlines were all eroded (with a thickness approximately 0.7-1.4 km).                                                                                                                                                                                                                                                                                                                                                                                                                                                              | <b>Ap21</b> -fault-related fold (the forelimb is a syncline and the backlimb is cut by a thrust ( $f_{P21}$ ), forming a faulted anticline- <b>Ap22</b> );<br><b>Ap23</b> -fault-related fold and its forelimb is a syncline.<br><b>Ap24</b> -faulted anticline and its backlimb is an anticline. | $f_{P21}$<br>0.20                      | $f_{P22}$<br>0.32 | $f_{P23}$<br>0.26 | $f_{P24}$<br>0.32 |                   |                   | $A_{p21}$<br>0.84                        | $A_{p22}$<br>0.63 | $A_{p23}$<br>0.53 |                   | 3.10                                                                                  |
| P3      | Sandstone and siltstone beds are often seen along the P3 cross section and could be correlated with westernmost part of the P2 section. Three fault-related anticlinoria were measured and these folds often showed shorter forelimbs and longer backlimbs. It was estimated that nearly 1.3-2.0 km sediments have been eroded from crest parts of the anticlines Ap32 and Ap33.                                                                                                                                                                                                                                                                                                                                                                                                                                  | <b>Ap31</b> —anticlinorium and both the forelimb and backlimb are marked by synclines;<br><b>Ap32</b> and <b>Ap33</b> —faulted anticlinorium;                                                                                                                                                     | $f_{P31}$<br>1.58                      | $f_{P32}$<br>0.53 | $f_{P33}$<br>1.16 | $f_{P34}$<br>0.74 |                   |                   | $A_{p31}$<br>0.84                        | $A_{p32}$<br>0.53 | $A_{p33}$<br>0.64 |                   | 6.02                                                                                  |

|    |                                                                                                                                                                                                                                                                                                                                                                                                                                                                                                                                                                                                                                                                                                                                              |                                                                                                                                                                   |                      |                  |                  |                  |                  |  |         |      |      |      |       |
|----|----------------------------------------------------------------------------------------------------------------------------------------------------------------------------------------------------------------------------------------------------------------------------------------------------------------------------------------------------------------------------------------------------------------------------------------------------------------------------------------------------------------------------------------------------------------------------------------------------------------------------------------------------------------------------------------------------------------------------------------------|-------------------------------------------------------------------------------------------------------------------------------------------------------------------|----------------------|------------------|------------------|------------------|------------------|--|---------|------|------|------|-------|
| P4 | Sedimentary rocks reveled by P4 section were all east-dipping and cut through by four east-dipping thrusts. These west-vergent strata may be backlimbs of the faulted anticlines and their crest parts of are inferred to be eroded during uplift of the wedge. In addition to the siltstones and interbedded sandstones, three tuff layers (each one was approximately 20 m) were observed.                                                                                                                                                                                                                                                                                                                                                 | Anticlinal monocline                                                                                                                                              | f <sub>P41</sub>     | f <sub>P42</sub> | f <sub>P43</sub> | f <sub>P44</sub> |                  |  | folds   |      |      |      | 3.15  |
|    |                                                                                                                                                                                                                                                                                                                                                                                                                                                                                                                                                                                                                                                                                                                                              |                                                                                                                                                                   | Undefin<br>ed        | 1.26             | undefin<br>ed    | 1.89             |                  |  | No data |      |      |      |       |
| P5 | Outcrops of the P5 section shows a classic syncline. Both its limbs are cut by east-dipping thrusts. Sandstones and tuff constitute the core of the syncline. The east limb was inferred to be shallow part of an anticline, which could harmonize with the strata observed on P4 section.                                                                                                                                                                                                                                                                                                                                                                                                                                                   | Simple syncline                                                                                                                                                   | fault                |                  |                  |                  |                  |  | Cp51    |      |      |      | 0.42  |
|    |                                                                                                                                                                                                                                                                                                                                                                                                                                                                                                                                                                                                                                                                                                                                              |                                                                                                                                                                   | No data              |                  |                  |                  |                  |  | 0.42    |      |      |      |       |
| P6 | Eastern part of the P6 section is a typical anticline with a vertical axis surface and approximately 3 km. It was estimated that nearly 0.8 km sedimentary rocks have been eroded from its crest. This anticline was separated from the synclinal monoclines to the west by an east-dipping thrust (f <sub>P63</sub> ). The synclinal monoclines consist primarily of sandstone and siltstone, which however, are not easy to correlate with rocks within the anticline. The western part of the P6 section includes three overturned folds (Ap61, Cp61 and Cp62). The crest part of the Ap61 and Ap62 anticlines were totally eroded—nearly 0.7-1.2 km sediments have been removed. The Cp61 syncline was cored by thin Miocene siltstones. | <b>Ap61</b> —overturned anticline (faulted anticline);<br><b>Cp61</b> —overturned syncline;<br><b>Cp62</b> —synclinorium (its forelimb is a small-scale anticline | f <sub>Toungup</sub> | f <sub>P61</sub> | f <sub>P62</sub> | f <sub>P63</sub> | f <sub>P64</sub> |  | Cp61    | Cp62 | Ap61 | Ap62 | 12.37 |
|    |                                                                                                                                                                                                                                                                                                                                                                                                                                                                                                                                                                                                                                                                                                                                              |                                                                                                                                                                   | 1.74                 | undefin<br>ed    | 0.63             | 1.16             | 2.63             |  | 2.63    | 0.32 | 2.00 | 1.26 |       |
| P7 | P7 section covers a region where mud volcano is often present. It was defined as circular syncline by Maurin and Rangin (2009) and thus its formation could be explained by mud activity followed by gravity tectonics. In the field however, both the core (Oligocene) and limbs (Eocene) of the syncline are sandstones—no mudstones are observed.                                                                                                                                                                                                                                                                                                                                                                                         | Syncline                                                                                                                                                          | Fault                |                  |                  |                  |                  |  | Cp71    |      |      |      | 0.32  |
|    |                                                                                                                                                                                                                                                                                                                                                                                                                                                                                                                                                                                                                                                                                                                                              |                                                                                                                                                                   | No data              |                  |                  |                  |                  |  | 0.32    |      |      |      |       |
| P8 | P8 section shows that the northwestern Ramree Island is composed of one syncline and two anticlines. The anticlines are only reveled their forelimbs in our section whereas the backlimbs are overthrust by the Eocene sedimentary rocks. These folds are often expressed as wide anticline or syncline.                                                                                                                                                                                                                                                                                                                                                                                                                                     | <b>Ap81</b> —faulted anticline<br><b>Ap82</b> —simple anticline<br><b>Cp81</b> —simple syncline                                                                   | f <sub>Kaladan</sub> | f <sub>P81</sub> |                  |                  |                  |  | Ap81    | Ap82 | Cp81 |      | 4.47  |
|    |                                                                                                                                                                                                                                                                                                                                                                                                                                                                                                                                                                                                                                                                                                                                              |                                                                                                                                                                   | 3.06                 | Undefin<br>ed    |                  |                  |                  |  | No data | 0.23 | 1.18 |      |       |

**Figure S1.** Geological map of the Pyay-Kyaukpyu Section and field observations

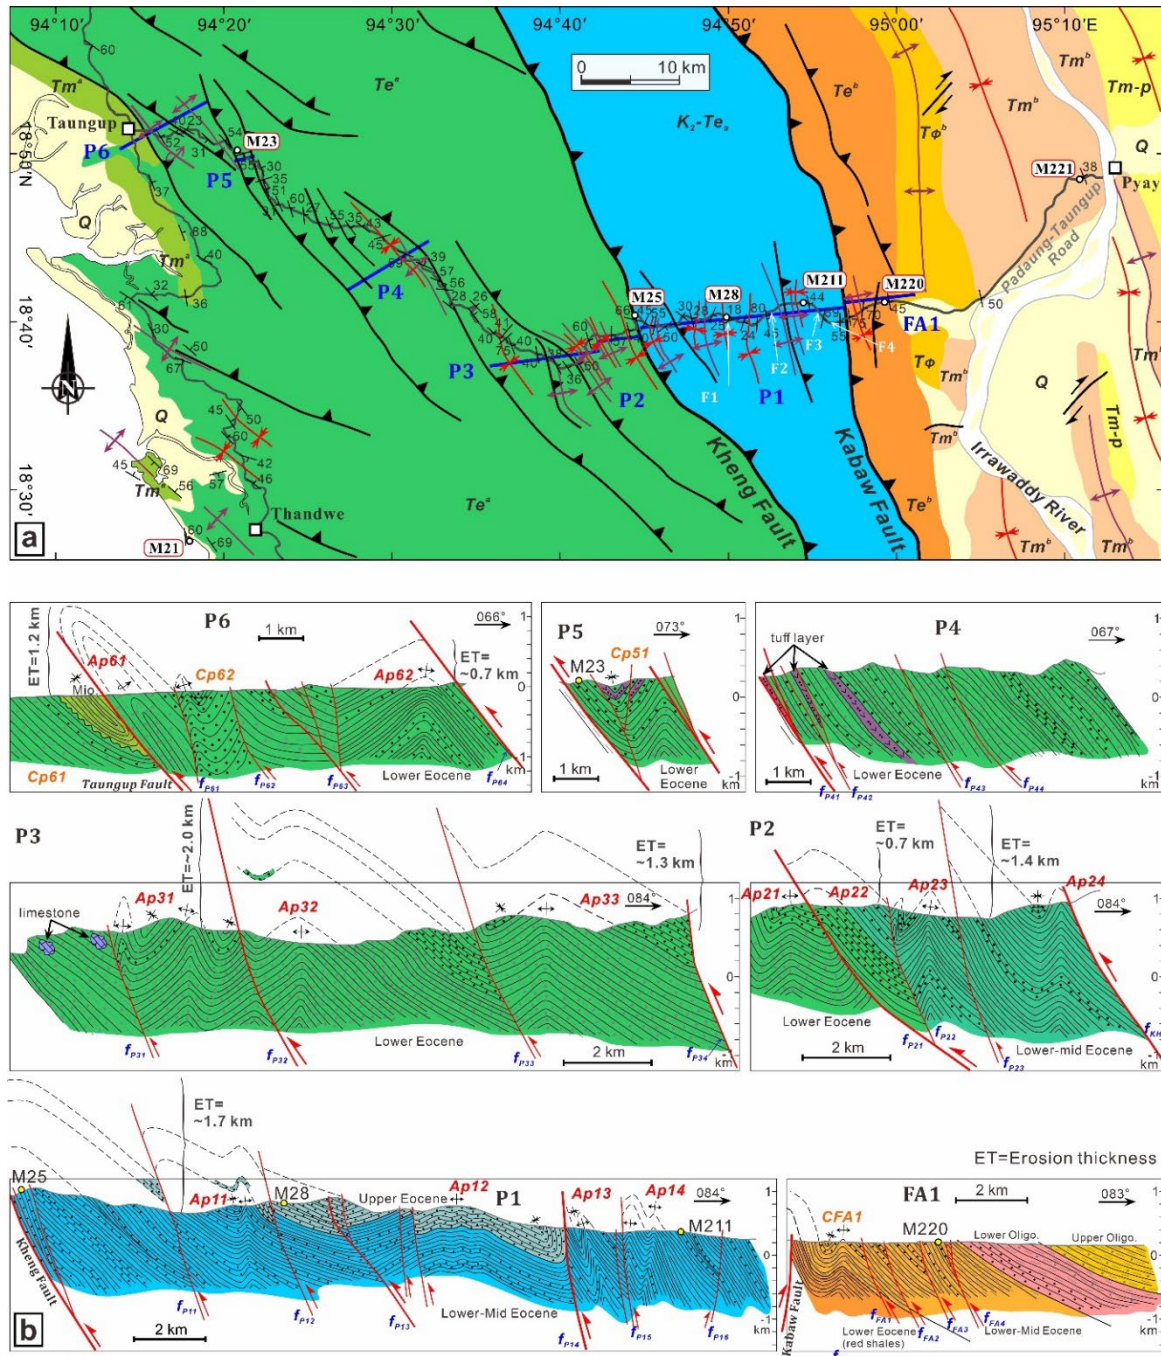

**Field investigation.** (a) Geologic map of the southern Indo-Burman Ranges showing locations of cross sections P1-P6 and analyzed samples (Burma Earth Sciences Research Division, 1977; Myint Swe, 2007; Tsung Aung, 1982); (b) Cross sections P1-P6; fault ( $f_x$ ) and fold ( $Cp_x$  and  $Ap_x$ ) numbers are referred to Table S1; (c) Geologic map of the Ramree Island showing cross sections P7-P8. Our new analyzed samples are marked on the geologic map with white circles. (d). Photos at F3, F4, F5, and F6 suggest that deposition of the Miocene turbiditic rocks were strongly affected by waves.

Figure S1 (continue)

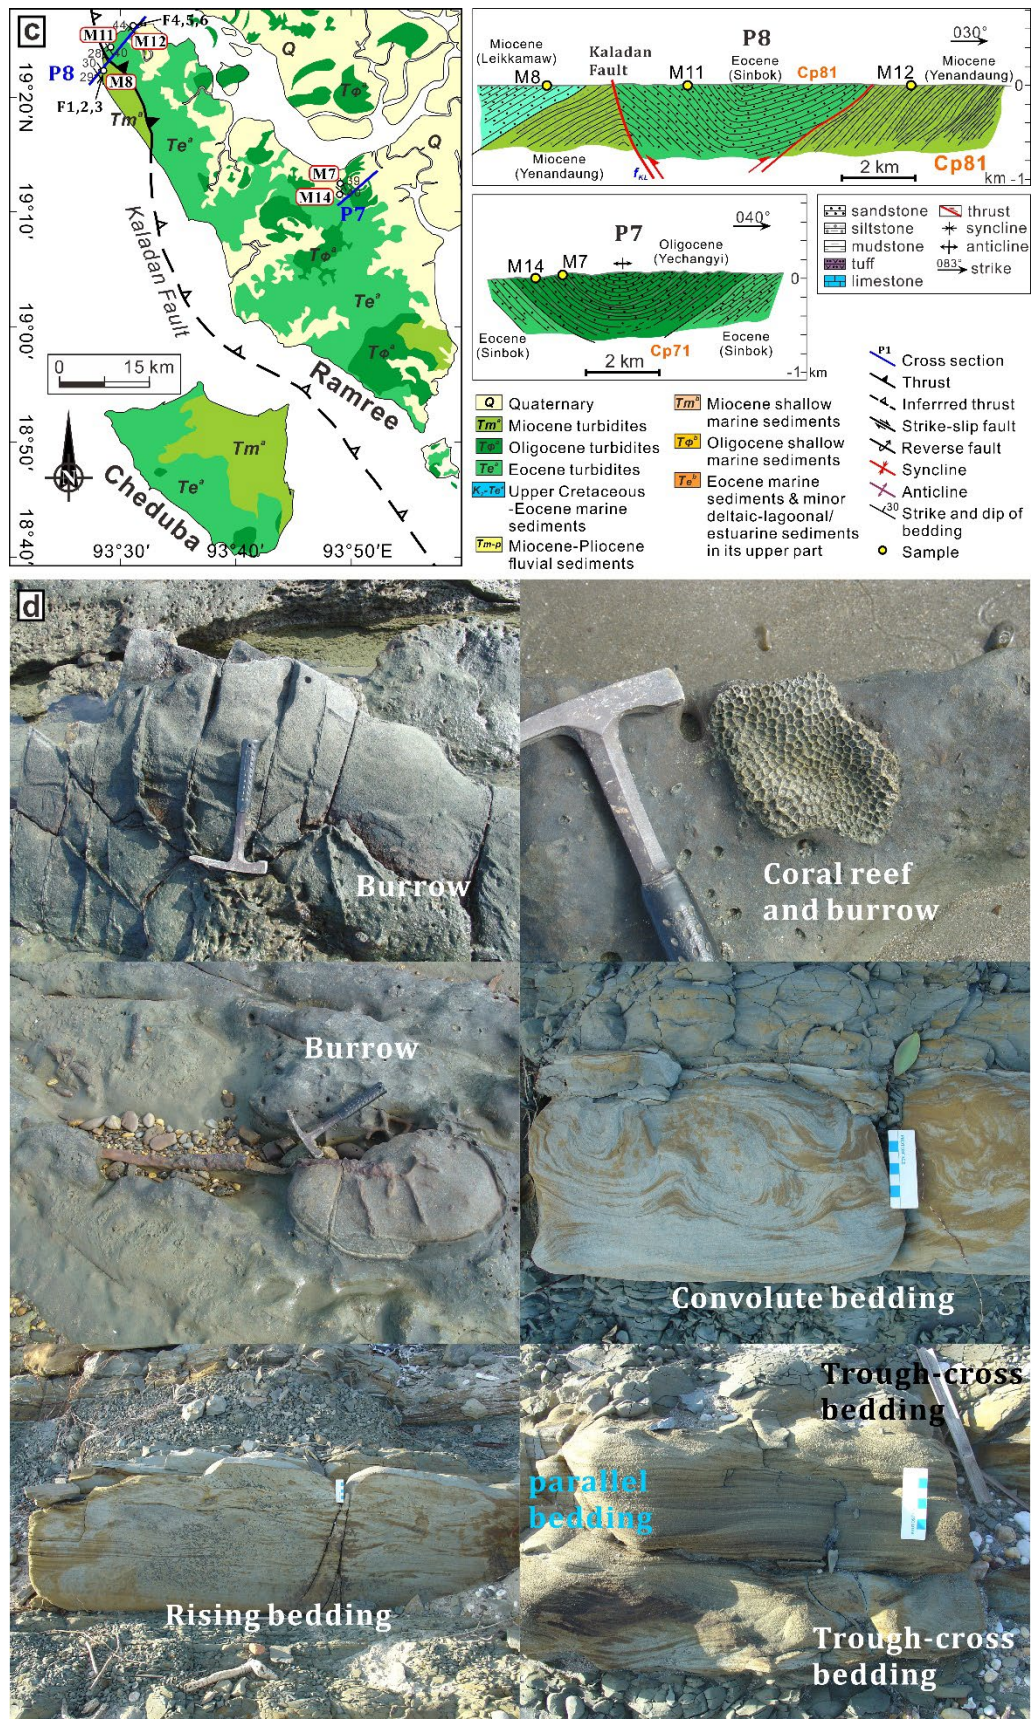

**Figure S2. Summary of the paleontological data in the study area.**

## Pyay–Toungup Section

### SHALE

1. *Amodiscus siliceus* (Terquem), *Glomospira irregularis* (Grzybowski), *Glomospira charoides* (Jones & Parker), *Glomospirella gaultina* (Berthelin) and *Haplophragmoides nonionoides* (Reuss); these were assigned as Upper Cretaceous to Paleogene by Gramann (1974).
2. Planktonic foraminiferal faunas (*Globotruncana* 2 and *Gumbelina* 7); these were assigned as Cretaceous by Fay Lain and Win Maw (1970).
3. (Samples collected from Cretaceous rocks) *Heterohelix globulosa* (Ehrenberg), *Hedbergella planispira* (Tappan), *Hedbergella delrioensis* (Carsey), *Prediscosphaera columnata* (Stover) and *Watznaueria* sp.; the age of planktonic foraminifera assemblage indicates the age range from Aptian to Maastrichtian and the nannofossils indicate Albian–Turonian (Naing, 2019).
4. (Samples collected from Paleogene rocks) *Chiloguembelina wilcoxensis* (Cushman & Ponton), *Chiloguembelina ototara* (Finlay), and *Globorotaloides carcoseleensis* (Toumarkine & Bolli), *Planorotalites chapmani* (Parr) and *Morozovella pseudobulloides* (Plummer); the age was assigned as Paleocene (Naing, 2019).

### CHERT

1. Radiolarian fauna: *Amphisphaera macrosphaera* (Nishimura), *A. coronata* (Ehrenberg), *Actinommidae* gen. et sp. indet., *Phormocyrtis turgida* (Krasheninnikov), *Podocyrtis papalis* (Ehrenberg), *Lamptonium fabaeforme fabaeforme* (Krasheninnikov), *Lychnocanoma carinatum* (Ehrenberg), *L. babylonis* (Clark and Campbell), *Cryptamphorella macropora* (Dumitrica), *Clathrocycloma parcum* (Foreman), *Haliomma teuria* (Hollis), and *Spongodiscus* sp.; the radiolarian assemblage is assigned to a late Paleocene to early Eocene age (Naing, 2019).

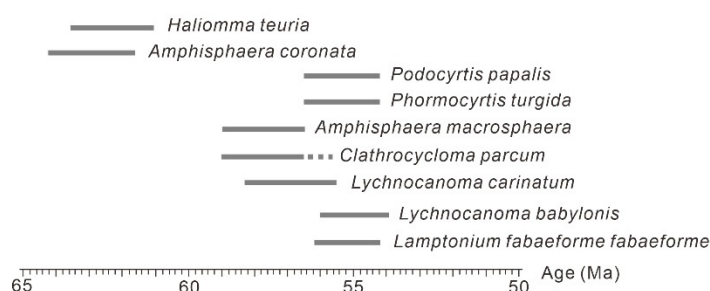

## Rakhine Coastal Region (well RM3-1 drilled on Ramree Island)

Data below are summarized from Lei et al. (2009)

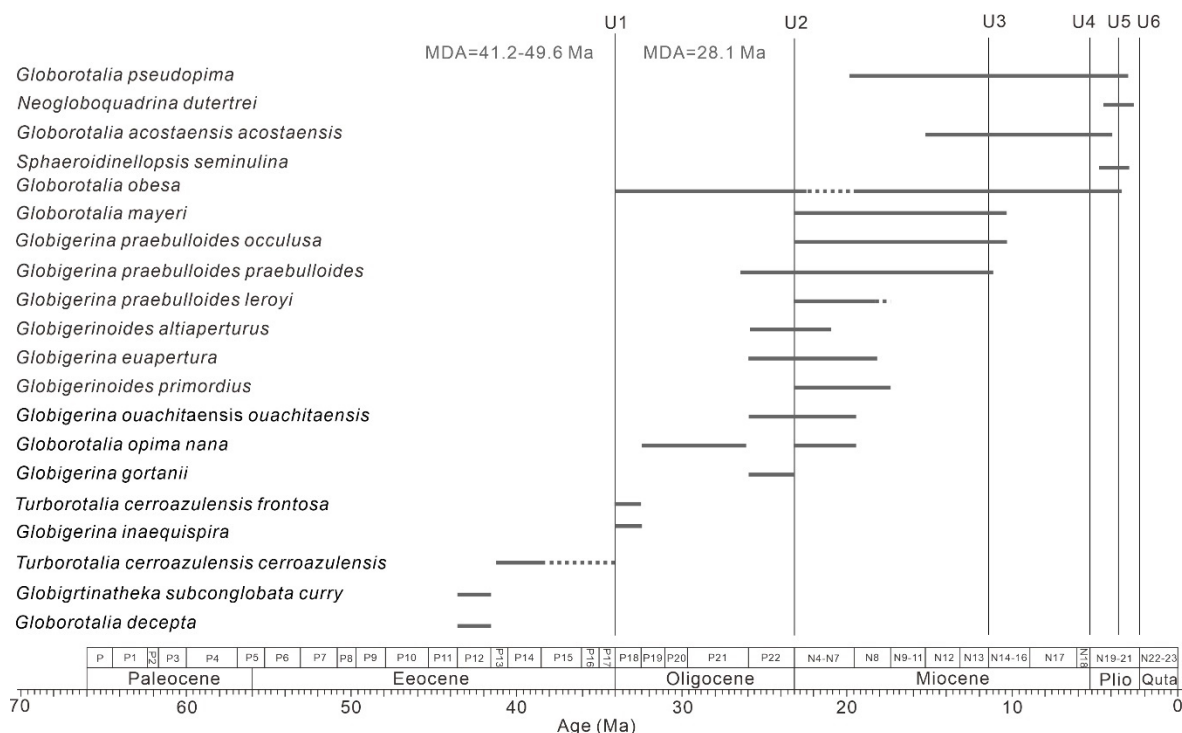

### References

- Fay Lain and Win Maw, 1970. Geology of Arakan Coast and Offshore Islands; unpublished report MOGE.
- Gramann, F., 1974. Some palaeontological data on the Triassic and Cretaceous of the western part of Burma (Arakan Islands, Arakan Yoma, western outcrops of Central Basin). *Newsletters in Stratigraphy*, 3, 277–290
- Lei, Q. P., Wu, X., and Wan, X. Q., 2009. The Eocene–Pliocene planktonic foraminifera from Ramree Island, Burma: *Acta Micropalaeontologica Sinica*, v. 26, no. 4, p. 323–330. (In Chinese with English abstract)
- Naing, T. T., 2019. Age, depositional history, and tectonics of the Indo-Burman Ranges [Ph. D. thesis]: University of Oxford, 404 p.

**Figure S3.** Uninterpreted seismic reflection sections (offshore region, southern Indo-Burman Ranges)

**For Figure 5A**

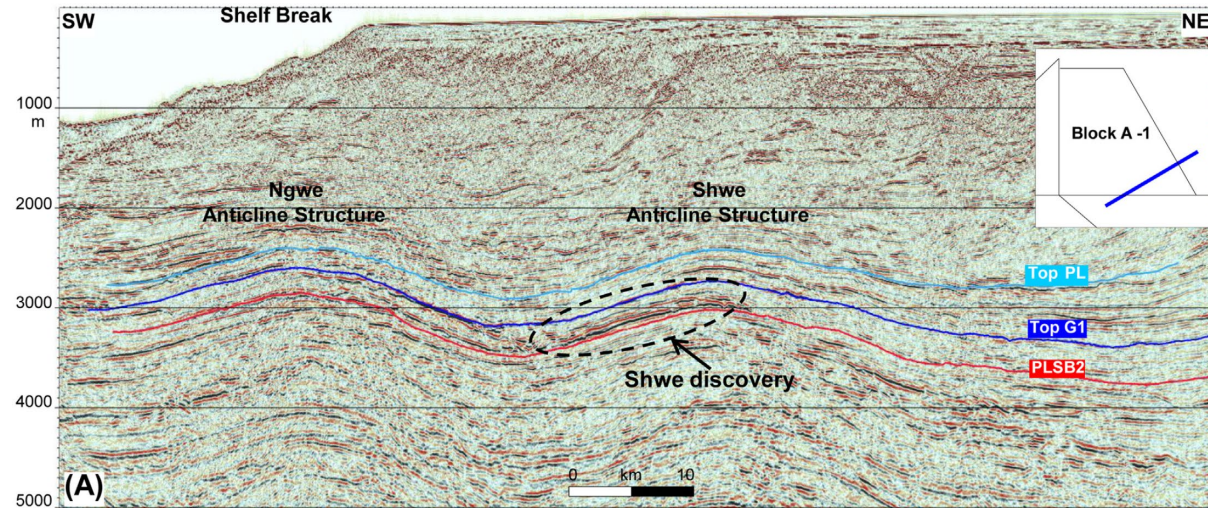

(From Yang S.Y. and Kim, J.W., 2014, *Marine and Petroleum Geology*, v.49, p.45-58)

**For Figure 5B**

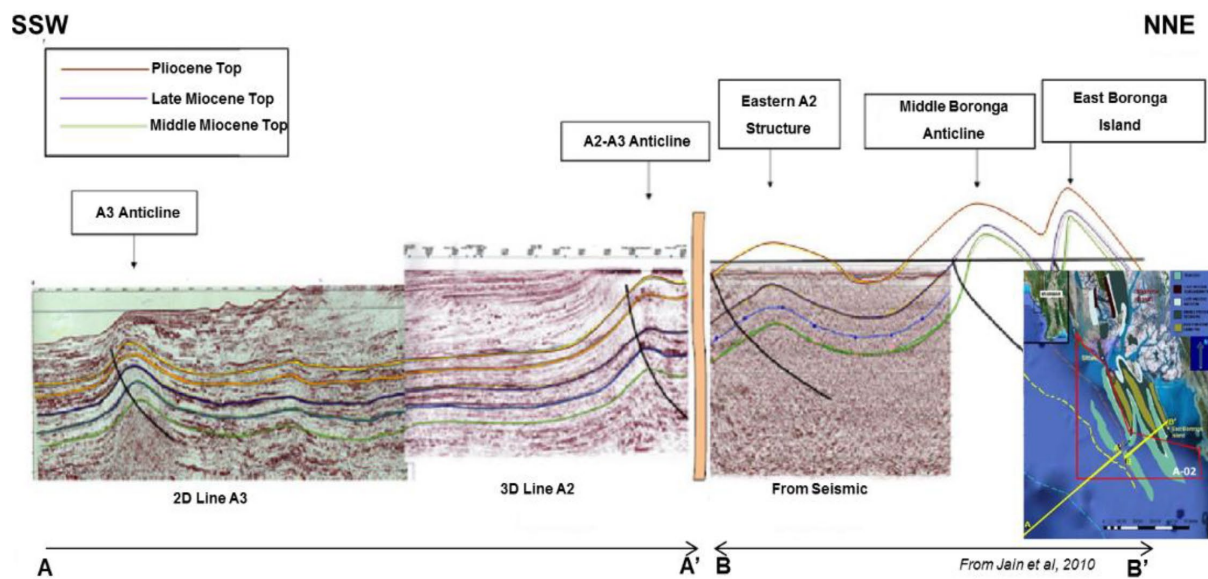

(From Jain, M., Das, P.S., Bandyopadhyay, B., 2010; 8<sup>th</sup> Biennial International Conference & Exposition on Petroleum Geophysics, P-58)

### For Figure 5C

Profile 7433

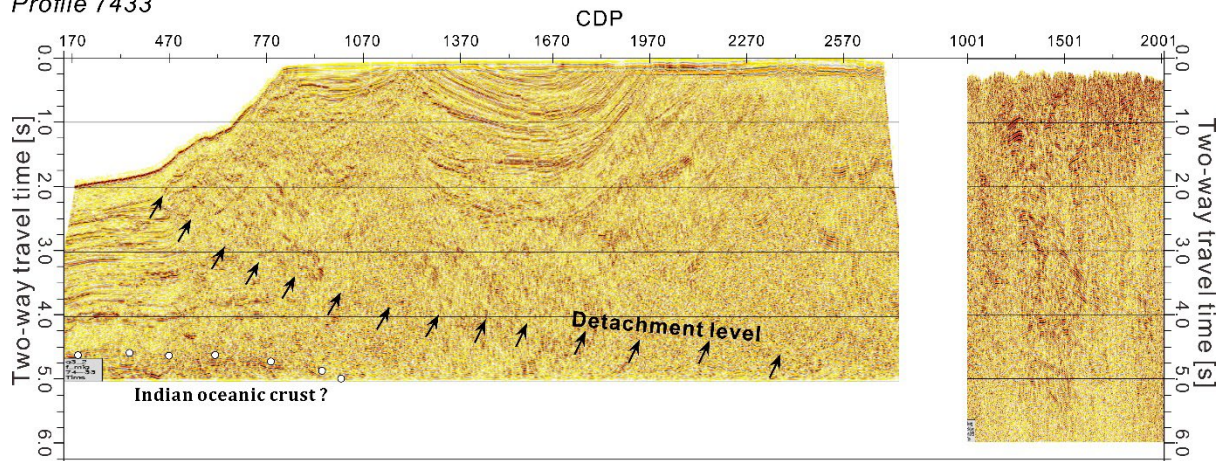

### For Figure 5D

Profile 7437

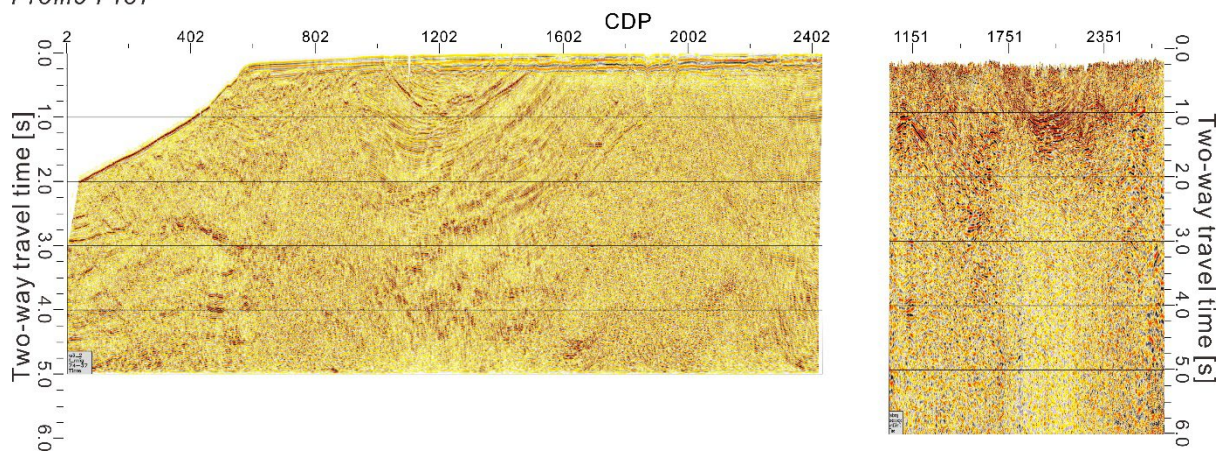

### For Figure 5E

Profile 4171

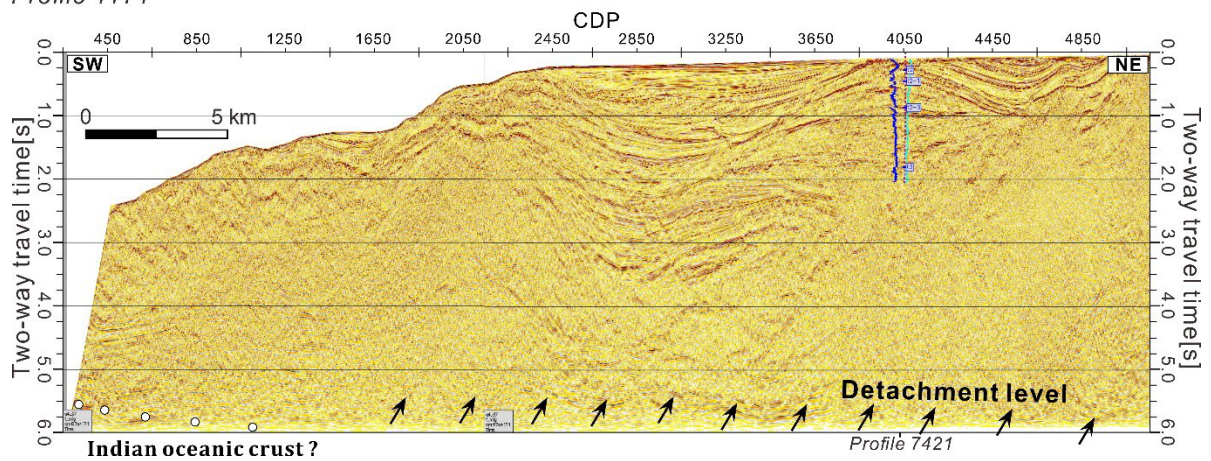

**For Figure 5F**

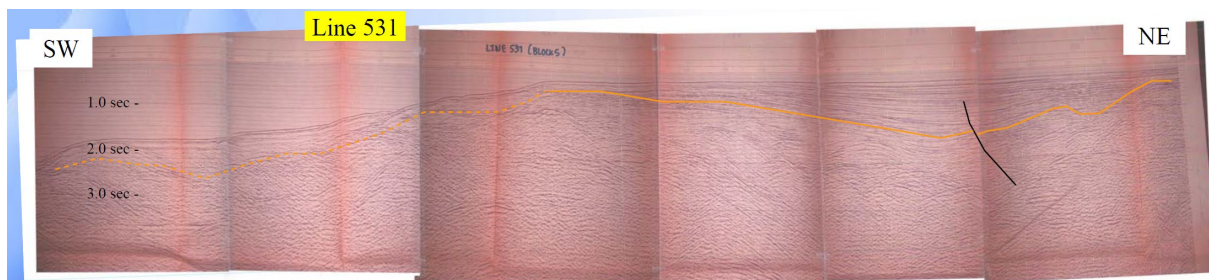

(From an internal report provided by CNOOC; Block A5 Seismic review and play type model)

**For Figure 5G**

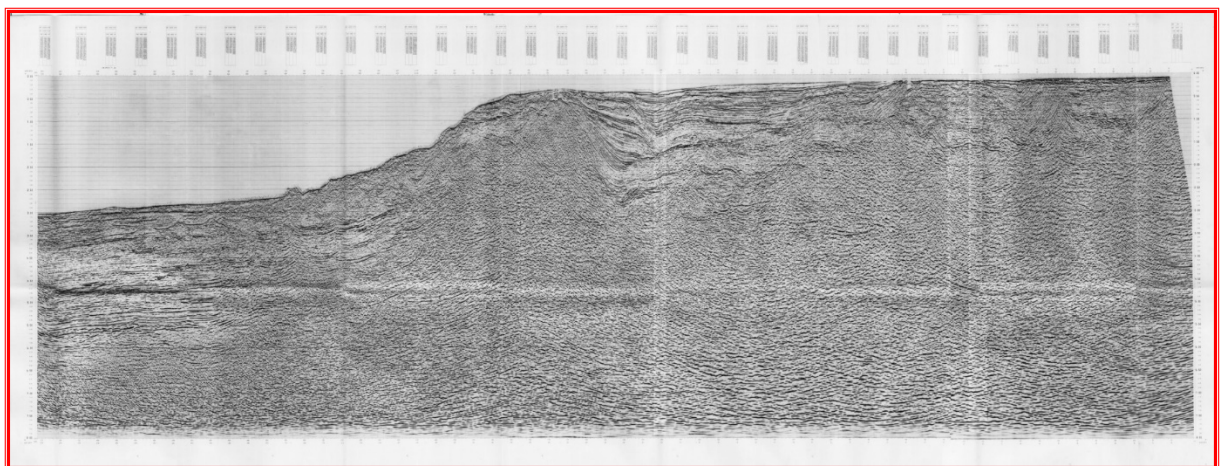

(From Nyan Tun, Maung Maung Kyaw, Kyaw Myo Win, and Kyaw Hlaing, 2007; internal report of **SILVER WAVE ENERGY**)

**For Figure 5H**

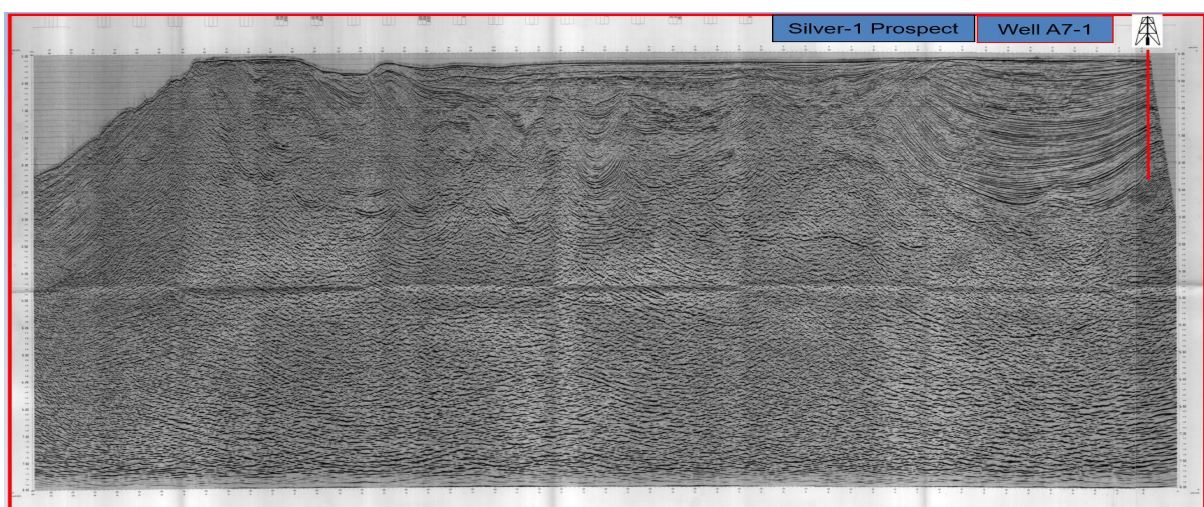

(From Nyan Tun, Maung Maung Kyaw, Kyaw Myo Win, and Kyaw Hlaing, 2007; internal report of **SILVER WAVE ENERGY**)

# Supplemental Material B. Analytical Methods

## Text S2. Detrital zircon U-Pb dating

Detrital zircon and apatite separations were carried out at the Institute of Hebei Regional Geology and Mineral Survey, Langfang, Hebei Province. The sandstone samples were first crushed to pass a 60 mesh (250  $\mu\text{m}$ ) sieve. Manual washing with water and then alcohol was performed carefully for multiple aliquots of the crushed material to get denser components of various grain sizes. An eletro-magnetometer was used to remove magnetic minerals. Conventional heavy liquid separation method was then used to concentrate heavy minerals, and zircon and apatite grains were picked out by hand under a binocular.

Detrital zircon grains were mounted randomly in 24 mm epoxy resin and polished close to one-third of individual grain diameters. Cathodoluminescence (CL) images were obtained using a JEOL JXA-8100 electron microprobe operating at 10 kV at the State Key Laboratory of Geological Processes and Mineral Resources (SKLGPMR), China University of Geosciences, Wuhan, in order to examine the internal structures of individual zircon and to select suitable position for U-Pb analysis. U-Pb dating of detrital zircon was performed at the SKLGPMR by using LA-ICP-MS. Detailed operating conditions for the laser ablation system and the ICP-MS instrument data reduction are the same as description by Liu et al. (2008, 2010). Laser sampling was performed using an excimer laser ablation system (GeoLas, 2005). An Agilent 7500a ICP-MS instrument was used to acquire ion-signal intensities. Each analysis incorporated a background acquisition of approximately 20 s (gas blank) followed by 50 s of data acquisition from the sample. The Agilent Chemstation was utilized for the acquisition of each individual analysis. Off-line selection and integration of background and analytic signals, and time-drift correction and quantitative calibration for trace element analyses and U-Pb dating were performed by software ICPMSDataCal\_8.4 (Liu et al., 2008, 2010). A beam of 24  $\mu\text{m}$  was used. The NIST SRM 610 glass was used as an external standard to calculated U, Th and Pb concentrations of unknowns. Zircon 91500 was used as an external standard to normalize isotopic fractionation during analyses of unknowns, and was repeatedly analyzed every five analyses (i.e., 2 zircon 91500 + 5 samples +2 zircon 91500).

## References

- Liu, Y.S., Hu, Z.C., Gao, S., Günther, D., Xu, J., Gao, C.G., and Chen, H.H., 2008. In situ analysis of major and trace elements of anhydrous minerals by LA-ICP-MS without applying an internal standard: *Chemical Geology*, v. 257, p. 34–43, <http://dx.doi.org/10.1016/j.chemgeo.2008.08.004>.
- Liu, Y.S., Gao, S., Hu, Z.C., Gao, C.G., Zong, K.Q., and Wang, D.B., 2010. Continental and oceanic crust recycling-induced melt-peridotite interactions in the Trans-North China orogen: U-Pb dating, Hf isotopes and trace elements in zircons from mantle xenoliths: *Journal of Petrology*, v. 51, p. 537–571, <http://dx.doi.org/10.1093/petrology/egp082>.

## **Text S3. Apatite fission track analysis**

### **Part I: AFT Methods**

#### ***AFT Sample Preparation***

The apatite fission track (AFT) samples were prepared for analysis using the procedures described by Donelick et al. (2005). Detrital apatite grains were isolated from each sample using standard gravimetric and magnetic mineral separation techniques (see above).

Detrital apatite grains were mounted in epoxide resin and polished to a fine finish using 0.3  $\mu\text{m}$  alumina slurry. AFTs were etched by stirring vigorously the grains mounts in reagent grade 5.5N  $\text{HNO}_3$  solution for 20 seconds at 21°C, followed by rinsing with distilled water. This process also removes most common lead contamination on the grain and epoxy surfaces.

#### ***AFT Data Collection***

AFT data were collected and compiled using the procedures described by Donelick et al. (2005). For samples M23, M25, M211, M220, M221, AFTs were viewed and measured by analyst Paul O'Sullivan in 2012 using a Zeiss optical microscope affixed with transmitted and reflected light, a manual digital XY stage (serial micrometers with 10  $\mu\text{m}$  resolution in both X and Y directions), and a drawing tube. A serial digitizing tablet was positioned beneath the drawing tube and an LED light was affixed to the tablet's cursor. The drawing tube superimposed an image of the bright LED light onto the microscope field of view allowing points of geometrical significant to be digitized using the cursor and passed to the operating software. A magnification of 2000x was used (100x objective, 10x ocular, 2x drawing tube) to measure surface fission track (SFT) density, confined fission track (CFT) lengths and angle to c-axis, and etch figure diameters parallel and perpendicular to c-axis ( $D_{\text{par}}$  and  $D_{\text{per}}$ , respectively; Donelick, 1993; Donelick, 1995). The number of CFTs available for measurement was enhanced by irradiating the apatite grain mounts with  $^{252}\text{Cf}$ -derived fission fragments (Donelick and Miller, 1991). For samples M02, M07, M08, M11, M12, M28 AFTs were viewed and measured by analyst Cleber Soares in 2012. The LA-ICP-MS was calibrated using NIST SRM 610 to obtain the low oxides, the ratio U/Th  $\sim 1$ , and the maximum counts of the target elements. During the analyzes, the  $^{238}\text{U}$  concentration was determined using uranium standard samples (Dur-2 and MT-7; Soares et al., 2015), which present  $< 2\%$  U variation. The isotopes concentration is carried out with Agilent 7800 quadrupole ICP-MS coupled with 213 NewWave laser ablation system. The spot size is chosen to cover the maximum area which fission tracks were measured (30-40  $\mu\text{m}$ ). Finally, the NIST SRM 610 analyzed together with age and uranium standards in order to check the LA-ICP-MS performance during analysis. The fission-track age was determined following Donelick et al. (2005). AFT ages were calculated similar to those at Apatite to Zircon, Inc. DR is used as the AFT zeta age calibration standard. Ratios of primary zeta (original zeta LA-ICP-MS session) to secondary zeta (current LA-ICP-MS session)  $^{238}\text{U}/^{43}\text{Ca}$  ratios for apatite were determined for each zeta calibration spot. The same ratios were used in unknown samples with the aim of normalizing the dataset.

#### ***LA-ICP-MS Data Collection***

The laser ablation-inductively coupled plasma-mass spectrometry (LA-ICP-MS) sessions that were run in this study are summarized in Table A1. LA and ICP-MS settings for each session are detailed in Tables A2 and A3, respectively. Masses measured for each session are detailed in Table A4. Age and chemical composition standards used in this study are summarized in Table A5. Age ranges measured for selected age standards are detailed in Table A6.

### ***LA-ICP-MS Data Modeling***

The data for each spot are characterized by a series of data scans, each scan representing one measurement for each mass in order of increasing mass. The series of data scans may be divided into background and signal+background segments. Background represents data collected prior to firing the laser. Signal+background represents data collected during laser ablation of the spot. The following steps are taken to determine background-corrected signal intensities for each mass analyzed for each spot:

- The true time is calculated at which each measurement was collected for each mass for each scan.
- The time at which background ends and signal+background begins is determined using selected masses listed in Table A4 (for which Search Last Background? is TRUE).
- A line is fitted to all background values for each mass prior to the time at which background ends. For a negative slope, the background value for the current mass is set equal to the value of the line at the time at which background ends; the error is set equal to the standard deviation of the background values about the fitted line. For zero or positive slope, the background value for the current mass is set equal to the mean of the fitted background values; the error is set equal to the standard deviation of the background values about the mean.
- Signal+background values are smoothed (versus scan number) for each mass using a Savitzky and Golay (1964) filter based on the median of fitted polynomials; the error of each signal+background value is set equal to the standard deviation of the signal+background values about the smoothed curve.
- Signal+background values are corrected for background noise by subtracting background.

Fission track ages were calculated using the equations of Donelick et al. (2005), Soares et al. (2014), and Cogné et al. (2019). U-Pb ages were calculated for each spot using the general principles described in Donelick et al. (2009) for zircon and Chew and Donelick (2012) for apatite. Chemical composition values were calculated using the methods described in Donelick and Donelick (2014) and Chew et al. (2014).

### **References**

- Barfod, G.H., Krogstad, E.J., Frei, R., and Albarede, F., 2005, Lu-Hf and PbSL geochronology of apatites from Proterozoic terranes: A first look at Lu-Hf isotopic closure in metamorphic apatite: *Geochimica et Cosmochimica Acta*, v. 69, n. 7, p. 1847-1859.
- Boyce, J.W. and Hodges, K.V., 2005. U and Th zoning in Cerro de Mercado (Durango, Mexico) fluorapatite: Insights regarding the impact of recoil redistribution of radiogenic  $^4\text{He}$  on (U-Th)/He thermochronology: *Chemical Geology*, v. 219, p. 261-274.
- Carlson, W.D., Donelick, R.A., and Ketcham, R.A., 1999, Variability of apatite fission track annealing kinetics I: Experimental results: *American Mineralogist*, v. 84, p. 1213-1223.
- Chew, D.M., Babechuk, M.G., Cogné, N., Mark, C., O'Sullivan, G.J., Henrichs, I.A., Doepke, D., McKenna, C.A., 2016, (LA,Q)-ICPMS trace-element analyses of Durango and McClure Mountain apatite and implications for making natural LA-ICPMS mineral standards: *Chemical Geology*, v. 435, p. 35-48.
- Chew, D.M. and Donelick, R.A., 2012, Combined apatite fission track and U-Pb dating by LA-ICP-MS and its application in apatite provenance analysis: *Quantitative Mineralogy*

- and Microanalysis of Sediments and Sedimentary Rocks, Mineralogical Association of Canada, Short Course, v. 42, p. 219–247.
- Chew, D.M., Donelick, R.A., Donelick, M.B., Kamber, B.S. and Stock, M., 2014, Apatite Chlorine Concentration Measurements by LA-ICP-MS: Geostandards and Geoanalytical Research, v. 38, pp. 23-35.
- Cogné, N., Chew, D.M., Donelick, R.A., and Ansberque, C., 2019, LA-ICP-MS apatite fission track dating: A practical zeta-based approach: Chemical Geology, v. 531, no. 119302.
- Donelick, R.A., 1993, A method of fission track analysis utilizing bulk chemical etching of apatite. U.S. Patent Number 5, 267, 274.
- Donelick, R.A., 1995, A method of fission track analysis utilizing bulk chemical etching of apatite. Australian Patent Number 658,800.
- Donelick R.A., and Donelick M.B. (unpublished data).
- Donelick, R.A. and Donelick, M.B., 2014, Method of determining the concentration of an element in a solid using relative abundances of isotopes from the solid and a reference solid. U.S. Patent Number 8, 901, 485.
- Donelick, R.A. and Miller, D.S., 1991, Enhanced TINT fission track densities in low spontaneous track density apatites using  $^{252}\text{Cf}$ -derived fission fragment tracks: A model and experimental observations: Nuclear Tracks and Radiation Measurements, v. 18, no. 3, pp. 301-307.
- Donelick, R.A., O’Sullivan, P.B., and Donelick, M.B., 2009, A discordia-based method of zircon U-Pb dating from LA-ICP-MS analysis of single spots. In P.J. Williams et al., Smart Science for Exploration and Mining. James Cook University, Townsville, Australia, pp. 276-278.
- Donelick, R.A., O’Sullivan, P.B., Ketcham, R.A., 2005. Apatite fission-track analysis: Reviews in Mineralogy and Geochemistry, Mineralogical Society of America, v. 58, p. 49-94.
- Kuiper, K.F., Deino, A., Hilgen, P.J., Krijgsman, W., Renne, P.R., and Wijbrans, J.R., 2008. Synchronizing rock clocks of Earth history: Science, 320, p. 500-504.
- Lanphere, M.A. and Baadsraard, H., 2001. Precise K-Ar,  $^{40}\text{Ar}/^{39}\text{Ar}$ , Rb-Sr and U-Pb mineral ages from the 27.5 Ma Fish Canyon Tuff reference standard: Chemical Geology, v. 175, p. 653-671.
- McDonough, W.F. and Sun, S.S., 1995, The Composition of the Earth: Chemical Geology, v. 120, p. 223-253.
- McDowell, F.W., McIntosh, W.C., and Farley, K.A., 2005, A precise  $^{40}\text{Ar}/^{39}\text{Ar}$  reference age for the Durango apatite (U-Th)/He and fission-track dating standard: Chemical Geology, v.214, n.3-4, p. 249-263.
- Paces, J.B. and Miller, J.D., 1993, Precise U-Pb ages of Duluth Complex and related mafic intrusions, northeastern Minnesota: Geochronological insights to physical, petrogenic, paleomagnetic, and tectonomagmatic processes associated with the 1.1 Ga Midcontinent Rift System: Journal of Geophysical Research, v. 98, no. B8, p. 13997-14013.
- Roden, M.K., Parrish, R.R., Miller, D.S., 1990. The absolute age of the Eifelian Tioga ash bed: Journal of Geology, v. 98, p. 282-285.
- Savitzky, A. and Golay, M.J.E., 1964, Smoothing and differentiation of data by simplified least square procedure: Analytical Chemistry, v. 44, no. 11, p. 1906-1909.
- Schoene, B. and Bowring, S.A., 2006, U-Pb systematic of the McClure Mountain syenite: thermochronological constraints on the age of the  $^{40}\text{Ar}/^{39}\text{Ar}$  standard MMhb: Contributions to Mineralogy and Petrology, v. 151, p. 615-630.
- Soares, C.J., Mertz-Kraus, R., Guedes, S., Stokli, D.F., Zack, T., 2015, Characterization of apatites as potential U reference materials for fission-track dating by LA-ICP-MS: Geostandards and Geoanalytical Research, v. 39, no. 3, p. 305-313, Doi: 10.1111/j.1751-

**Table A1a.** LA-ICP-MS session summary for samples M23, M25, M211, M220, M221.

|                      |                                                                    |
|----------------------|--------------------------------------------------------------------|
| Setting              | Apatite AFT U-Th-Pb 20121029                                       |
| Laboratory           | Donelick Properties, Viola, ID, USA                                |
| Hardware             | LA: Resonetics RESOlution M-50<br>ICP-MS: Agilent 7700x quadrapole |
| Laboratory Scientist | Dr. Margaret B. Donelick                                           |
| Data Collected by    | Dr. Margaret B. Donelick                                           |
| Software             | Apatite.com Partners LLC MSData                                    |
| Data Processed by    | Dr. Raymond A. Donelick                                            |

**Table A1b.** LA-ICP-MS session summary for samples M02, M07, M08, M11, M12, M28.

|                      |                                 |
|----------------------|---------------------------------|
| Setting              | Apatite AFT U-Th-Pb 2004001-037 |
| Laboratory           | Chronuscamp Research, Brazil    |
| Hardware             | Agilent 7800x                   |
| Laboratory Scientist | Cleber J. Soares                |
| Data Collected by    | Cleber J. Soares                |
| Software             | Apatite.com Partners LLC MSData |
| Data Processed by    | Cleber J. Soares                |

**Table A2a.** LA settings for samples M23, M25, M211, M220, M221.

|                           |                                            |
|---------------------------|--------------------------------------------|
| Setting                   | Apatite AFT U-Th-Pb 20121029               |
| Warmup Time               | TTL 7.6 s                                  |
| Dwell Time                | 48 s                                       |
| Washout Time              | 28 s                                       |
| Laser Repetition Rate     | 8 Hz                                       |
| Ablation Type             | 26 micron diameter spot                    |
| Attenuation               | 50%                                        |
| Stabilization Mode        | constant energy 4.2 mJ                     |
| Carrier Gas 1             | 950 mL/min ultra high purity He            |
| Carrier Gas 2             | 4.1 mL/min ultra high purity N2            |
| Stage Position Correction | Donelick Properties proprietary correction |

**Table A2b.** LA settings for samples M02, M07, M08, M11, M12, M28.

|                       |                                  |
|-----------------------|----------------------------------|
| Setting               | Apatite AFT U-Th-Pb 2004001-037  |
| Warmup Time           | 15000 ms                         |
| Dwell Time            | TTL 35000 ms                     |
| Washout Time          | TTL 20000 ms                     |
| Laser Repetition Rate | 5.0 Hz                           |
| Ablation Type         | 30-40 micron diameter spot       |
| Stabilization Mode    | constant energy 6.40-6.50 kV     |
| Carrier Gas 1         | 680 mL/min ultra high purity He  |
| Carrier Gas 2         | 3.15 mL/min ultra high purity H2 |

**Table A3a.** ICP-MS settings for samples M23, M25, M211, M220, M221.

|             |                                   |
|-------------|-----------------------------------|
| Setting     | Apatite AFT U-Th-Pb 20121029      |
| Carrier Gas | 5.10 kPa 1.0 L/min high purity Ar |

|                                      |                      |
|--------------------------------------|----------------------|
| Plasma RF Power                      | 1400 V               |
| Plasma RF Matching                   | 1.80 V               |
| Plasma Sample Depth                  | 4.2 mm               |
| Plasma Carrier Gas                   | 0.85 L/min           |
| Plasma Option Gas                    | disabled             |
| Plasma Nebulizer Pump                | 0.00 rps             |
| Plasma S/C Temperature               | 2 degC               |
| Plasma Gas Switch                    | Makeup Gas           |
| Plasma Makeup Gas                    | 0.00 L/min           |
| Lenses Extract 1                     | -11.2 V              |
| Lenses Extract 2                     | -195 V               |
| Lenses Omega Bias                    | -110 V               |
| Lenses Omega Lens                    | 8.9 V                |
| Lenses Cell Entrance                 | -40 V                |
| Lenses Cell Exit                     | -60 V                |
| Lenses Deflect                       | 14.2 V               |
| Lenses Plate Bias                    | -50 V                |
| Cell Use Gas                         | not checked          |
| Cell He Flow                         | disabled             |
| Cell H2 Flow                         | disabled             |
| Cell 3rd Gas Flow                    | disabled             |
| Cell Octapole Bias                   | -18 V                |
| Cell Octapole RF                     | 200 V                |
| Cell Energy Discrimination           | 5.0 V                |
| Quadrupole Mass Gain                 | 134                  |
| Quadrupole Mass Offset               | 121                  |
| Quadrupole Axis Gain                 | 1.0017               |
| Quadrupole Axis Offset               | 0                    |
| Quadrupole QP Bias                   | -13 V                |
| Torch Axis Torch H                   | 0.0 mm               |
| Torch Axis Torch V                   | 0.0 mm               |
| EM (Hardware Settings) Discriminator | 4.0 mV               |
| EM (Hardware Settings) Analog HV     | 1723 V               |
| EM (Hardware Settings) Pulse HV      | 1030 V               |
| Operator                             | Margaret B. Donelick |
| Technical Assistance                 | Raymond A. Donelick  |

**Table A3b.** ICP-MS settings for samples M02, M07, M08, M11, M12, M28.

|                      |                                         |
|----------------------|-----------------------------------------|
| Setting              | Apatite AFT U-Th-Pb 2004001-037         |
| Carrier Gas          | 5.00-5.40 kPa 0.87 L/min high purity Ar |
| Plasma RF Power      | 1550 W                                  |
| Plasma RF Matching   | 1.80 V                                  |
| Plasma Sample Depth  | 8.0 mm                                  |
| Lenses Extract 1     | 0.0                                     |
| Lenses Extract 2     | -200 V                                  |
| Lenses Omega Bias    | -90 V                                   |
| Lenses Omega Lens    | 9.4 V                                   |
| Lenses Cell Entrance | -30 V                                   |

|                      |                  |
|----------------------|------------------|
| Lenses Cell Exit     | -50 V            |
| Lenses Deflect       | 10.2 V           |
| Lenses Plate Bias    | -35 V            |
| Operator             | Cleber J. Soares |
| Technical Assistance | Cleber J. Soares |

**Table A4a.** Masses measured for samples M23, M25, M211, M220, M221.

| Mass | Element | Sampling Time<br>Apatite AFT<br>U-Th-Pb 20121029 | Search Last<br>Background? |
|------|---------|--------------------------------------------------|----------------------------|
| 23   | Na      | 0.0001                                           |                            |
| 24   | Mg      | 0.0001                                           |                            |
| 27   | Al      | 0.005                                            |                            |
| 29   | Si      | 0.0005                                           |                            |
| 31   | P       | 0.0005                                           | TRUE                       |
| 34   | S       | 0.001                                            |                            |
| 35   | Cl      | 0.1                                              |                            |
| 43   | Ca      | 0.05                                             | TRUE                       |
| 48   | Ca      | 0.05                                             | TRUE                       |
| 55   | Mn      | 0.001                                            |                            |
| 56   | Fe      | 0.001                                            |                            |
| 75   | As      | 0.0005                                           |                            |
| 79   | Br      | 0.1                                              |                            |
| 88   | Sr      | 0.0005                                           |                            |
| 89   | Y       | 0.0005                                           |                            |
| 139  | La      | 0.003                                            | TRUE                       |
| 140  | Ce      | 0.003                                            | TRUE                       |
| 141  | Pr      | 0.003                                            | TRUE                       |
| 146  | Nd      | 0.003                                            | TRUE                       |
| 147  | Sm      | 0.003                                            |                            |
| 151  | Eu      | 0.003                                            |                            |
| 157  | Gd      | 0.003                                            |                            |
| 159  | Tb      | 0.003                                            |                            |
| 163  | Dy      | 0.003                                            |                            |
| 165  | Ho      | 0.003                                            |                            |
| 166  | Er      | 0.003                                            |                            |
| 169  | Tm      | 0.003                                            |                            |
| 172  | Yb      | 0.003                                            |                            |
| 175  | Lu      | 0.003                                            |                            |
| 202  | Hg      | 0.05                                             |                            |
| 204  | Pb      | 0.15                                             |                            |
| 206  | Pb      | 0.15                                             |                            |
| 207  | Pb      | 0.15                                             |                            |
| 208  | Pb      | 0.15                                             |                            |
| 232  | Th      | 0.0125                                           | TRUE                       |
| 235  | U       | 0.0125                                           |                            |
| 238  | U       | 0.0125                                           | TRUE                       |

**Table A5a.** Apatite UPb and matrix-matched chemical composition standards.

| Standard Name           | Age Standard Type | Accepted Age                                        | Reference                                                         |
|-------------------------|-------------------|-----------------------------------------------------|-------------------------------------------------------------------|
| AZ = Arizona            | secondary Ap      | ~440 Ma                                             | Donelick and Donelick (unpublished data)                          |
| B3 = Bamble             | secondary Ap      | ~1128 Ma                                            | Carlson et al. (1999)<br>Donelick and Donelick (unpublished data) |
| DR = Durango            | secondary Ap      | 31.44 ± 0.18 Ma<br>33.15±0.98 Ma<br>(Cleber' s lab) | McDowell et al. (2005)<br>Boyce and Hodges (2005)                 |
| F5 = Duluth anorthosite | secondary Ap      | 1099.0±0.6 Ma                                       | Paces et al. (1993)                                               |
| FC = Duluth anorthosite | secondary Ap      | 1099.0±0.6 Ma                                       | Paces et al. (1993)                                               |
| IF = Fish Canyon Tuff   | secondary Ap      | 28.201 ± 0.012 Ma                                   | Lanphere and Baadsraard (2001)<br>Kuiper et al. (2008)            |
| MM = McClure Mtn.       | primary Ap        | 523.98 ± 0.12 Ma                                    | Schoene and Bowring (2006)                                        |
| OL=Otter Lake           | secondary Ap      | 913 ± 7 Ma                                          | Barfod et al. (2005)                                              |
| RA = Russian            | secondary Ap      | ~410 Ma                                             | Donelick and Donelick (unpublished data)                          |
| TI=Tioga Bed B          | secondary Ap      | 390.5 ± 0.5 Ma                                      | Roden et al. (1990)                                               |

**Table A5b.** Reference and measured element concentrations of Durango (DRG) apatite (Chew et al., 2016) for LA-ICP-MS session for samples M23, M25, M211, M220, M221. Also listed are reference concentrations for of C1 chondrite (McDonough and Sun, 1995).

| REE | Durango Reference Concentration (ppm) | Durango/Apatite AFT /UThPb 20121029 Measured Concentration (ppm) | C1/Chondrite Reference Concentration (ppm) |
|-----|---------------------------------------|------------------------------------------------------------------|--------------------------------------------|
| La  | 3786.00                               | 3789.91                                                          | 0.2370                                     |
| Ce  | 5306.00                               | 5308.46                                                          | 0.6130                                     |
| Pr  | 472.50                                | 472.76                                                           | 0.0928                                     |
| Nd  | 1534.00                               | 1536.09                                                          | 0.4570                                     |
| Sm  | 215.20                                | 215.72                                                           | 0.1480                                     |
| Eu  | 18.90                                 | 19.02                                                            | 0.0563                                     |
| Gd  | 186.90                                | 187.21                                                           | 0.1990                                     |
| Tb  | 24.25                                 | 24.32                                                            | 0.0361                                     |
| Dy  | 129.90                                | 130.26                                                           | 0.2460                                     |
| Ho  | 26.35                                 | 26.41                                                            | 0.0546                                     |
| Er  | 68.69                                 | 68.89                                                            | 0.1600                                     |
| Tm  | 8.75                                  | 8.80                                                             | 0.0247                                     |
| Yb  | 45.10                                 | 45.33                                                            | 0.1610                                     |
| Lu  | 5.17                                  | 5.21                                                             | 0.0246                                     |
| Th  | 235.00                                | 235.81                                                           |                                            |
| U   | 13.00                                 | 13.06                                                            |                                            |

**Table A6a.** Pb-corrected apatite UPb ages measured for apatite UPb age standards for LA-ICP-MS session for samples M23, M25, M211, M220, M221. McClure Mountain (MM) was the primary standard.

| Standard                            | Accepted Age | Measured Age | 2 sigma | Spots   | mswd | P(mswd)  |
|-------------------------------------|--------------|--------------|---------|---------|------|----------|
| Apatite<br>AFT<br>UThPb<br>20121029 |              |              |         |         |      |          |
| AZ                                  | ~440         | 422.54       | 6.92    | 39/43   | 1.37 | 0.454123 |
| B3                                  | ~1128        | 1082.45      | 23.58   | 32/28   | 1.30 | 0.666090 |
| DR +<br>DRG                         | 31.44        | 30.33        | 0.598   | 117/169 | 1.28 | 0.331916 |
| F5                                  | 1099.0       | 1048.00      | 17.44   | 41/43   | 1.32 | 0.588628 |
| FC                                  | 1099.0       | 1037.42      | 20.10   | 32/38   | 1.23 | 0.899578 |
| IF                                  | 28.201       | 28.32        | 1.77    | 5/39    | 2.33 | 0.088135 |
| MM<br>primary                       | 523.98       | 528.77       | 5.02    | 125/127 | 0.70 | 0.122757 |
| OL                                  | 913          | 905.23       | 13.50   | 42/42   | 0.45 | 0.026769 |
| RA                                  | ~410         | 400.54       | 6.87    | 37/43   | 1.17 | 1.000000 |
| TI                                  | 390.5        | 429.57       | 7.41    | 37/40   | 1.00 | 1.000000 |

**Figure A1.** Distribution of apatite UPb ages for M23, M25, M211, M220, M221 (top plot; N = 514) and M02, M07, M08, M11, M12, M28 (bottom plot; N=127).

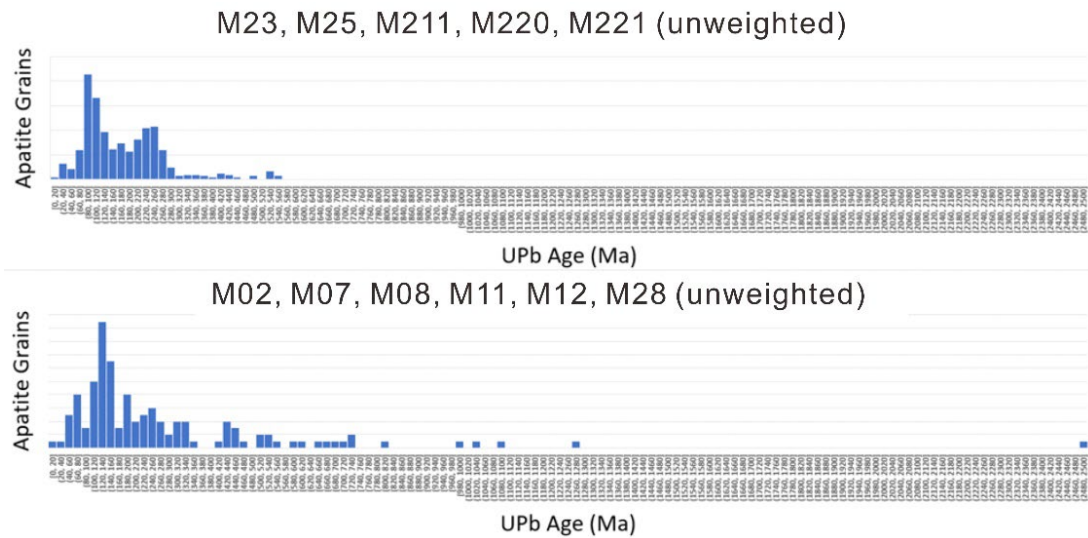

## Part II: High Resolution – AFT using REEs and U-Pb Data

### Background

In sedimentary rocks and modern sediments, mineral grains such as apatite and zircon from multiple provenance sources may be mixed together. A practical example of where this may be important is the interpretation of apatite fission track (AFT) data from a sandstone. To properly interpret AFT data from such a mixture of sources, it is necessary to bin apatite grains, and their associated AFT data, into discrete groups based on AFT-independent data such as chemical composition or isotopic age.

The Radial Plot uses the AFT ages and age errors to produce one or more vectors that point to an age or ages of presumed geological significance. Algorithm BinomFit deconvolves the AFT age probability density function into one or more age peaks, each peak yielding an age of presumed geological significance. Neither of these approaches requires any AFT-independent data. O'Sullivan et al. (2018) use laser ablation-inductively coupled plasma-mass spectrometry (LA-ICP-MS) to measure rare earth element (REE) concentrations and uranium-lead ( $^{206}\text{Pb}^*/^{238}\text{U}$ ) ages for apatite grains and sort them into groups using principal component analysis.

For High Resolution-AFT (HR-AFT), we sort apatite grains into groups using the following steps: 1) for each of approximately 9 different apatite standard species analyzed during a LA-ICP-MS session, measure REE concentrations and  $^{206}\text{Pb}^*/^{238}\text{U}$  ages and calculate the mean and standard deviation for each measured value for each standard, 2) derive a session-specific, best-fit line for each measured value that gives standard deviation as a function of mean among all standards, 3) for each unknown apatite grain (from an unknown group), use the derived best-fit lines to define an apatite grain group centered at the measured values for the unknown grain and bounded by 2 standard deviations about the measured values, and 4) search for and isolate other unknown apatite grains that exhibit measured values that fall within the bounds of the defined apatite grain group.

Using the color ramp for  $^{206}\text{Pb}^*/^{238}\text{U}$  age shown in Figure A2, REE plots for all standard apatite grains are shown in Figure A3a; these data were calculated for the mean (Mean), standard deviation (Std Dev), skewness, and kurtosis for 29 FT-independent parameters (Table A7). Major standard apatite grain sub-groups produced by program *Sort by Spot* are shown in Figure A3b.

Using the color ramp for  $^{206}\text{Pb}^*/^{238}\text{U}$  age shown in Figure A2, REE plots for all unknown apatite grains are shown in Figure A4a. These apatite grain sub-groups were sorted by program *Sort by Spot* and each sub-group for which the number of age grains is  $\geq 2$  is shown for each sample in Figure A4b. Pooled fission track ages for each sub-group are given in Table A8. Confined fission track length statistics for each sub-group are given in Table A9.

### Sort by Spot Method

The *Sort by Spot* method depends on the assumption that each of the 10 standard groups studied here represent a typical group of apatite grains. We derive a linear function

$$Y = m \cdot X + b$$

where:

Y = Std Dev of the calibration parameter for a given standard group

X = Mean log(C1 normalized ppm by weight) value for a given standard group

m = fitted slope

$b$  = fitted Y-intercept

for each FT-independent parameter in Table A7 to constrain the data range for that parameter for any apatite grain group. Figure A5 shows plots of the (X,Y) data from Table A1 and their respective regression lines fitted using the least-squares method. Table A11 lists the slope ( $m$ ) and intercept ( $b$ ) values for each fitted line. Table A11 also lists

$b_u = b + (\text{maximum}(Y \text{ measured} - Y \text{ fitted value}))$  for a given FT-independent parameter

$Y_{\min}$  = minimum value of Y measured for a given FT-independent parameter

$Y_{\min} = Y_{\min} + (b_u - b)$ .

The *Sort by Spot* method treats each spot as the center of an apatite grain population. At the current spot, data ranges for each FT-independent parameter are calculated as follows:

$Y_u = Y_c + n_{\text{StdDev}} \cdot (m \cdot X + b_u)$

$Y_l = Y_c - n_{\text{StdDev}} \cdot (m \cdot X + b_u)$ ;  $Y_l$  never set less than  $Y_{\min}$

where:

$Y_u$  = upper limit of current FT-independent parameter range

$Y_l$  = lower limit of current FT-independent parameter range

$Y_c$  = current value of FT-independent parameter

$n_{\text{StdDev}}$  = number of Std Dev on each side of  $Y_c$ .

In this study, the following  $n_{\text{StdDev}}$  values were used:

$n_{\text{StdDev}} = 3.00$  for  $^{206}\text{Pb}/^{238}\text{U}$  Age data range

$n_{\text{StdDev}} = 2.00$  for all other data ranges.

For a general population of spots, the *Sort by Spot* method searches for the spot that has the greatest number of other spots consistent with the hypothesis that they represent the same apatite grain group. Once found, the spot data for this apatite grain sub-group are processed and stored, the spots in this apatite sub-group are removed from the general population of spots, and the process is repeated on the diminished general population of spots until there remain zero spots in the general population.

### Thermal History Reconstruction

$FT^3$  is Apatite.com Partners' software package for calculating thermal histories based on conventional AFT and HR-AFT data. The thermal history implications of the AFT data are summarized in Table A12. The time-temperature constraints used for modeling each sample are summarized in Table A13. Details of the model results for each sample are shown in Part III.

The philosophy of  $FT^3$  is similar to that of AFTSolve (Ketcham et al., 2000) but allows provenance history to vary among modeled apatite grain populations.  $FT^3$  uses the experimental data of Donelick (unpublished), Donelick (1988), Donelick et al. (1990), Donelick (1991), Vrolijk et al. (1992), Carlson et al. (1999), and the calibration of Rmr0 provided by Ketcham et al. (1999). All CFT data are projected onto the c-axis using the model of Donelick (1991) after Donelick et al. (1999).

$FT^3$  yields tT paths with corresponding AFT age goodness-of-fit (GOF; based on Gaussian probability) and CFT length GOF (based on Kuiper's statistic) values for each population. Models are deemed acceptable when all GOF values are  $\geq 0.05$  in this study.

## References

- Burnham, A.K., Sweeney, J.J., 1989, A chemical kinetic model of vitrinite maturation and reflectance: *Geochimica Cosmochimica Acta*, v. 53, p. 2649–2657.
- Carlson, W.D., Donelick, R.A., and Ketcham, R.A., 1999, Variability of apatite fission track annealing kinetics I: Experimental results: *American Mineralogist*, v. 84, p. 1213-1223.
- Chew, D.M., Babechuk, M.G., Cogné, N., Mark, C., O'Sullivan, G.J., Henrichs, I.A., Doepke, D., and McKenna, C.A., 2016, (LA,Q)-ICPMS trace-element analyses of Durango and McClure Mountain apatite and implications for making natural LA-ICPMS mineral standards: *Chemical Geology*, v. 435, p. 35-48.
- Donelick, R.A., 1988, Etchable fission track length reduction in apatite: Experimental observations, theory, and geological applications. Ph.D. Dissertation, Rensselaer Polytechnic Institute, Troy, New York, 414 p.
- Donelick, R.A., 1991, Crystallographic orientation dependence of mean etchable fission track length in apatite: An empirical model and experimental observations: *American Mineralogist*, v. 76, nos. 1 and 2, p. 83-91.
- Donelick, R.A., Ketcham, R.A., and Carlson, W.D., 1999, Variability of apatite fission track annealing kinetics II: Crystallographic orientation effects: *American Mineralogist*, v. 84, p. 1224-1234.
- Donelick, R.A., Roden, M.K., Mooers, J.D., Carpenter, B.S. and Miller, D.S., 1990, Etchable length reduction of induced fission tracks in apatite at room temperature (23°C): Crystallographic orientation effects and "initial" mean lengths: *Nuclear Tracks and Radiation Measurements*, v. 17, no. 3, p. 261-265.
- Ketcham, R.A., Donelick, R.A., and Carlson, W.D., 1999, Variability of apatite fission track annealing kinetics III: Extrapolation to geological time scales: *American Mineralogist*, v. 84, p. 1235-1255.
- Ketcham, R.A., Donelick, R.A., and Donelick, M.B., 2000, AFTSolve: A program for multi-kinetic modeling of apatite fission-track data: *Geological Materials Research*, v.88, n.5-6, p. 929-929.
- Nielsen, S.B., Clausen, O.R., McGregor, E., 2017, Basin%Ro: A vitrinite reflectance model derived from basin and laboratory data: *Basin Research*, v. 29, suppl. 1, p. 515-536. doi:10.1111/bre.12160
- O'Sullivan, G., Chew, D.M., Morton, A.C., and Mark, C., 2018, An integrated apatite geochronology and geochemistry tool for sedimentary provenance analysis: *Geochemistry, Geophysics, Geosystems*, v. 19, no. 9, p. 1309-1326.
- Schenk, O., Peters, K.E., Burnham, A.K., 2017, Evaluation of alternatives to Easy%R0 for calibration of basin and petroleum system models. Extended abstract, EAGE, Paris, France.
- Vrolijk, P., Donelick, R.A., Queng, J., and Cloos, M., 1992, Testing models of fission track annealing in apatite in a simple thermal setting: Site 800, Leg 129. In: Larson, R.L. et al., *Proceedings of the Ocean Drilling Program, Scientific Results, Volume 129*, p. 169-176.

**Figure A2.** REE plots in this study are color-coded by  $^{206}\text{Pb}^*/^{238}\text{U}$  age using this color ramp.

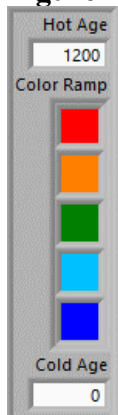

**Figure A3.** REE plots colored by U-Pb age (Figure A2) for apatite standards in this study.

a) All standards.

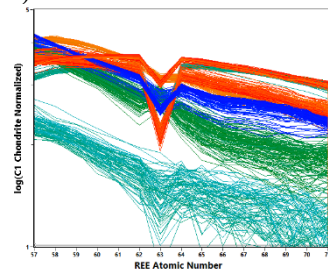

b) Major standard sub-groups from *Sort by Spot*. Based on  $2.5\sigma$  general including REE values,  $2.5\sigma$  U-Pb age,  $2.5\sigma$  Eu anomaly, and  $2.5\sigma$  REE difference values.

AZ\_Sub Group\_004\_053, B3\_Sub Group\_006\_038, DR\_Sub Group\_001\_169

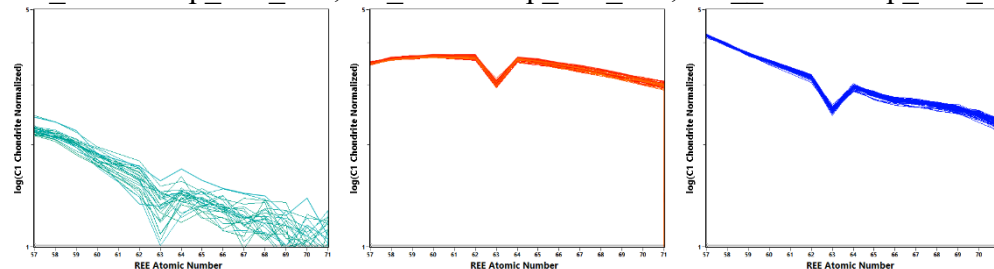

DRG\_Sub Group\_001\_169, F5\_Sub Group\_003\_077, FC\_Sub Group\_003\_077

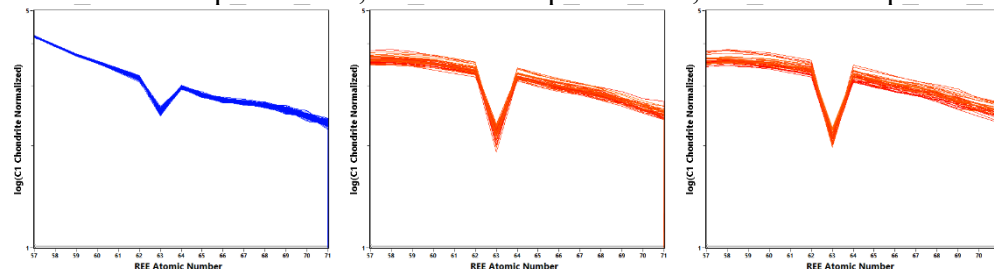

IF\_Sub Group\_007\_038, MM\_Sub Group\_002\_106, OL\_Sub Group\_005\_042

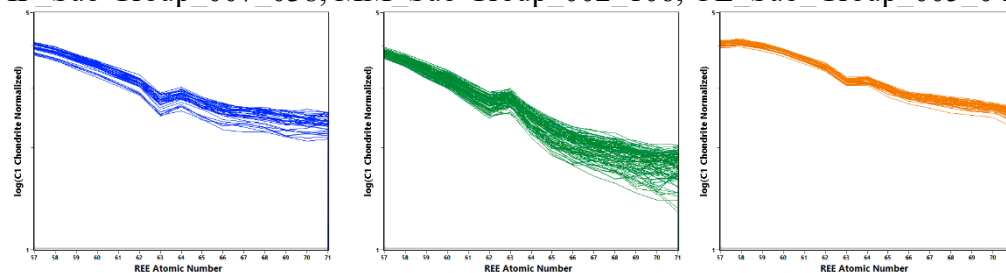

RA Sub Group 004\_053, TI Sub Group 008\_038

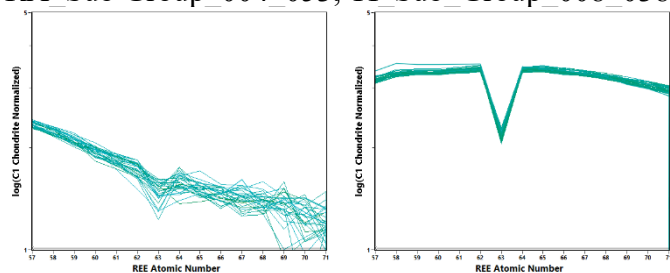

**Figure A4.** REE plots colored by U-Pb age (Figure A2) for apatite unknowns in this study.

a) All apatite grains from samples M23, M25, M211, M220, M221 (left) and samples M02, M07, M08, M11, M12, M28 (right)

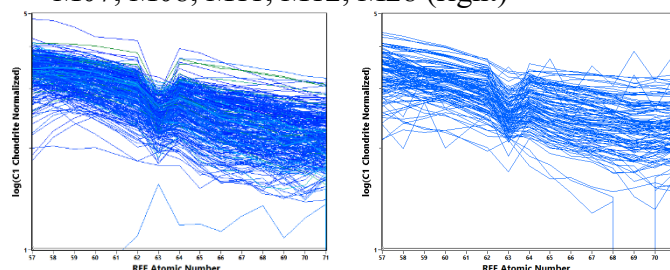

b) Unknown sub-groups having 2 or more AFT grain ages, from *Sort by Spot*. Based on  $2.5\sigma$  general including REE values,  $2.5\sigma$  U-Pb age,  $2.5\sigma$  Eu anomaly, and  $2.5\sigma$  REE difference values.

**M23**

All

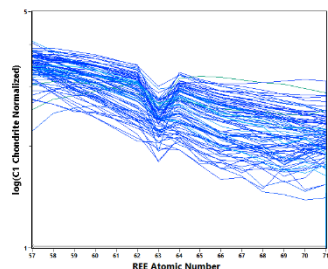

M23 Sub Group 001\_060, MM23 Sub Group 002\_048, MM23 Sub Group 004\_035

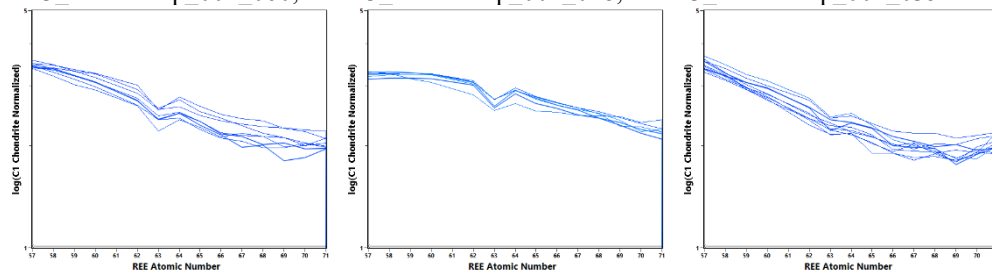

M23 Sub Group 005\_033 MM23 Sub Group 010\_015

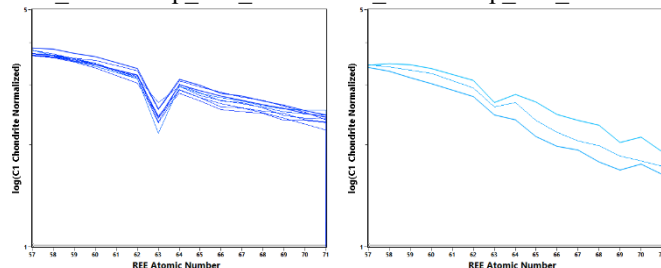

## M25

All

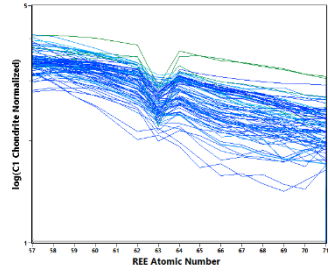

M25\_Sub Group\_001\_060, MM25\_Sub Group\_002\_048, MM25\_Sub Group\_006\_033

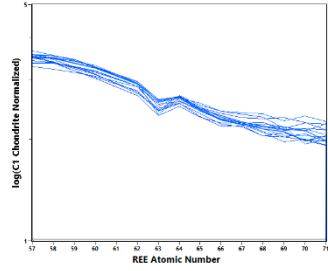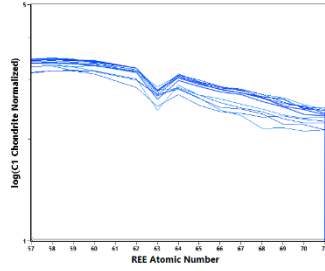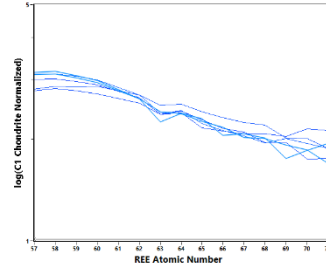

M25\_Sub Group\_009\_018

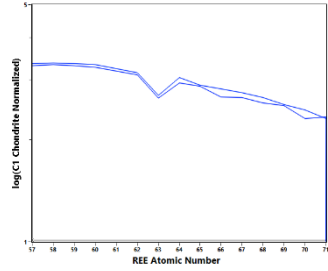

## M211

All

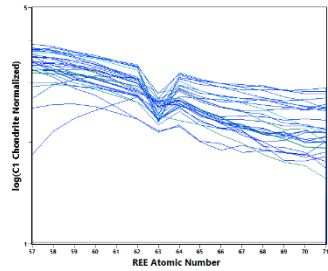

MM211\_Sub Group\_001\_060, MM211\_Sub Group\_004\_035, MM211\_Sub Group\_033\_004

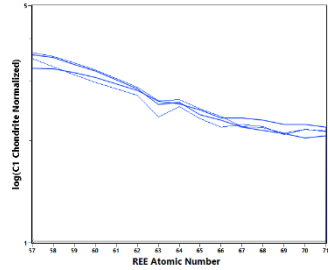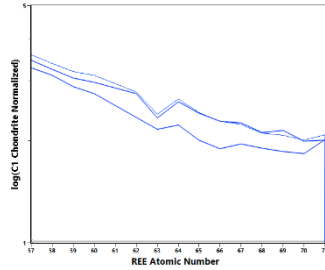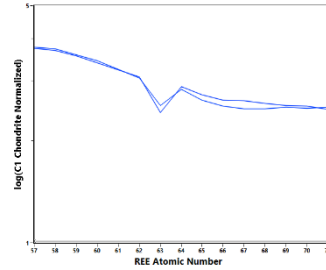

M211\_Sub Group\_037\_003

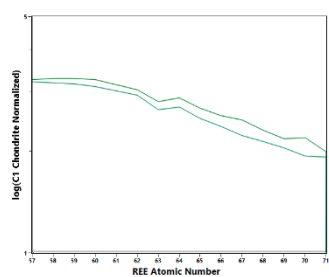

## M220

All

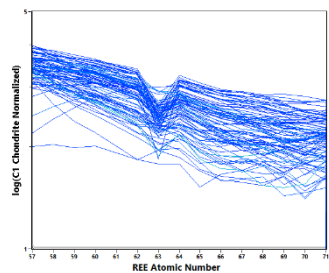

M220\_Sub Group\_001\_060, MM220\_Sub Group\_002\_048, MM220\_Sub Group\_004\_035

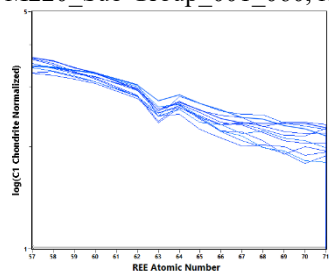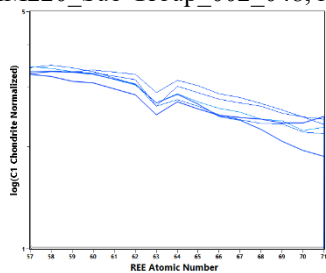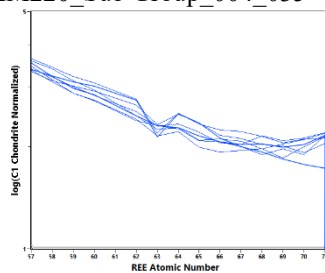

M220\_Sub Group\_005\_033, MM220\_Sub Group\_010\_015, MM220\_Sub Group\_013\_011

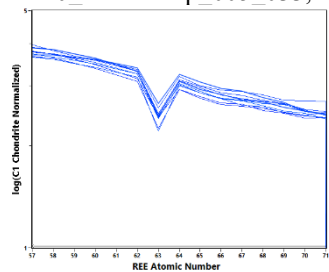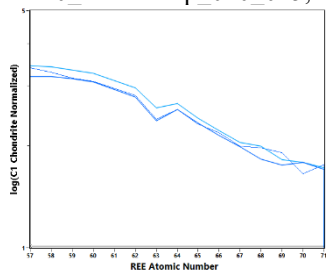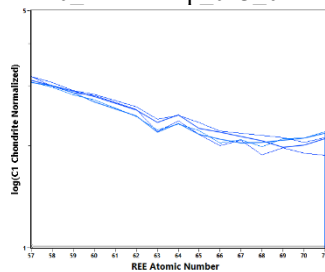

## M221

All

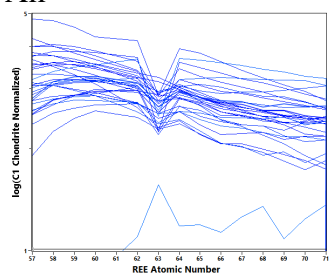

No sub-groups with 2 or more AFT grain ages.

## M02

All

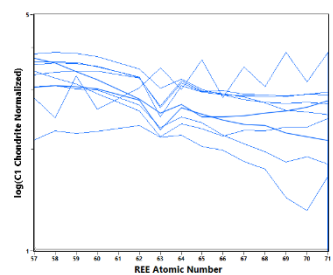

M02\_Sub Group\_006\_033

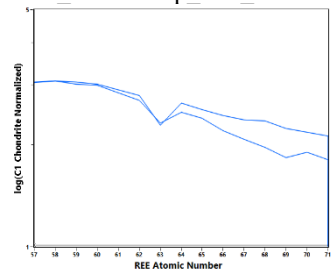

## M07

All

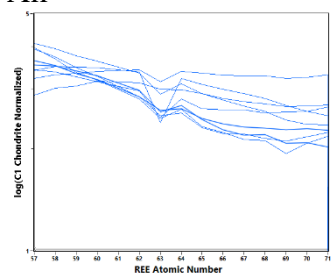

M07\_Sub Group\_001\_060

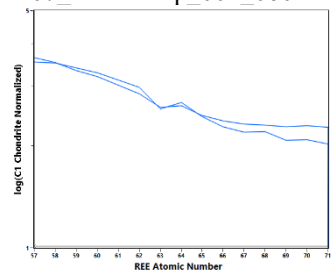

## M08

All

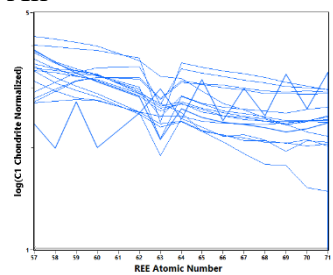

M08\_Sub Group\_004\_035

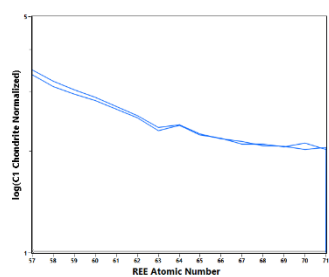

**M11**

**All**

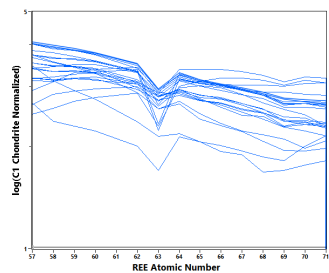

**M11\_Sub Group\_002\_048, MM11\_Sub Group\_047\_003**

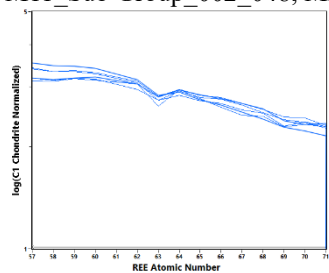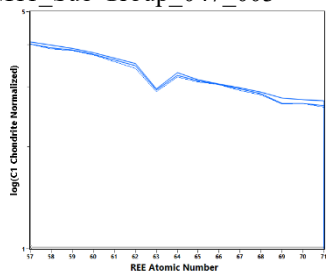

**M12**

**All**

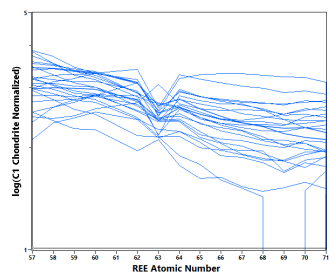

**M12\_Sub Group\_002\_048, MM12\_Sub Group\_006\_033, MM12\_Sub Group\_009\_018**

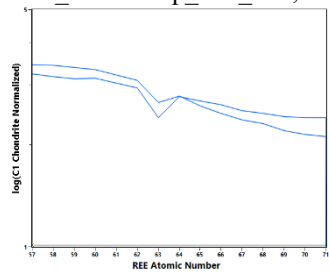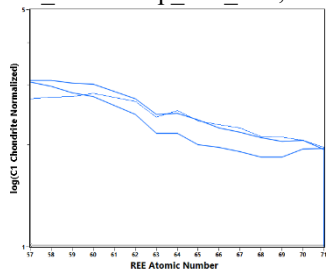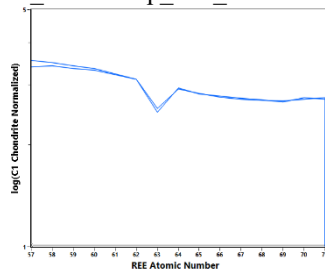

**M12\_Sub Group\_013\_011**

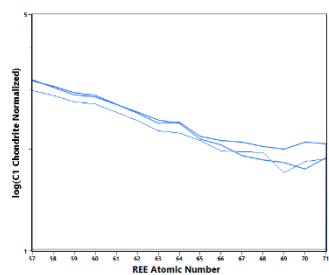

**M28**

**All**

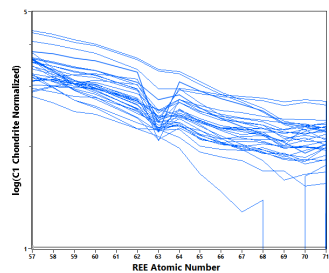

M28\_Sub Group\_001\_060, MM28\_Sub Group\_004\_035, MM28\_Sub Group\_006\_033

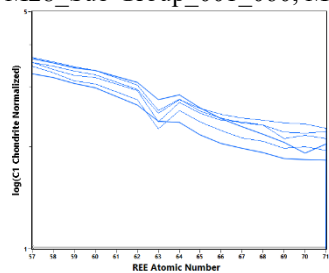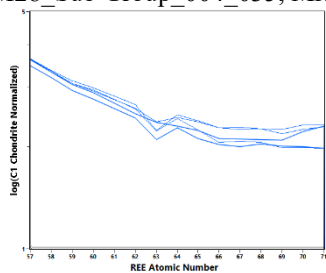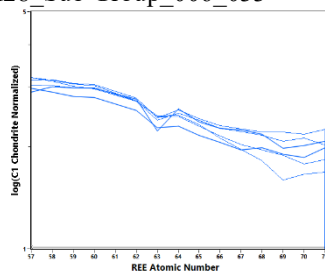

M28\_Sub Group\_019\_008, MM28\_Sub Group\_078\_002

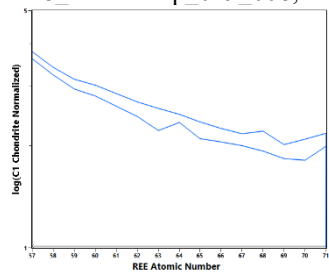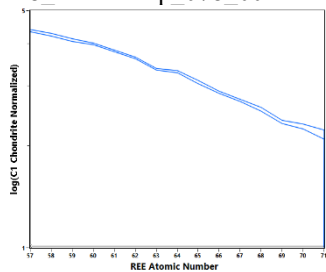

**Figure A5a.** Calibrations of log(C1 Normalized La ppm) Std Dev and log(C1 Normalized Ce ppm)-log(C1 Normalized La ppm) Std Dev versus Mean log(C1 Normalized La ppm).

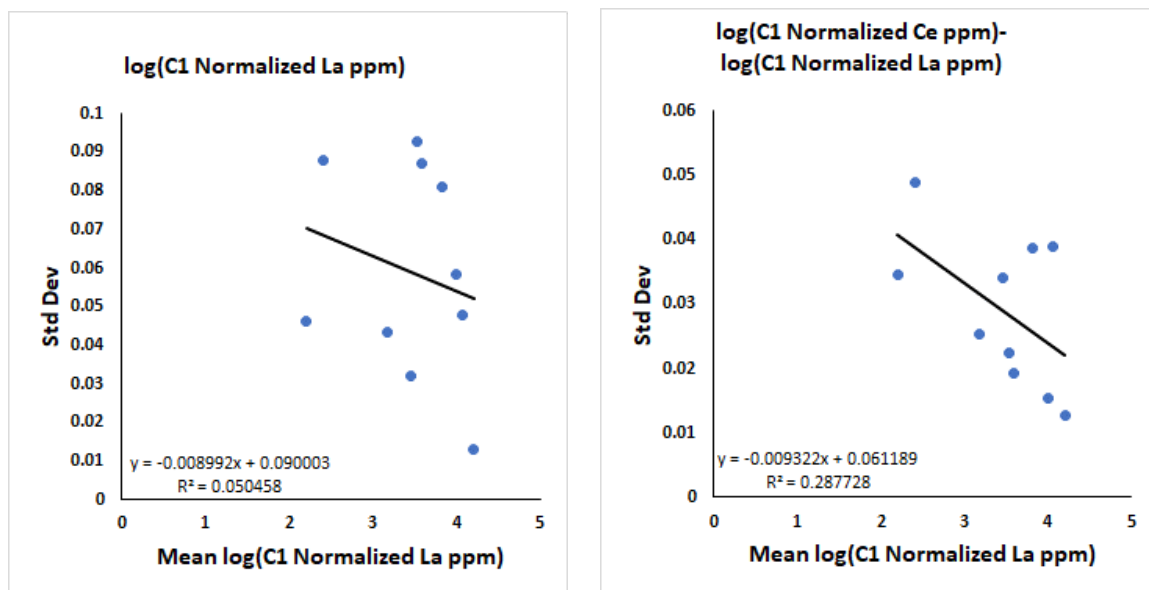

**Figure A5b.** Calibrations of log(C1 Normalized Ce ppm) Std Dev and log(C1 Normalized Pr ppm)-log(C1 Normalized Ce ppm) Std Dev versus Mean log(C1 Normalized Ce ppm).

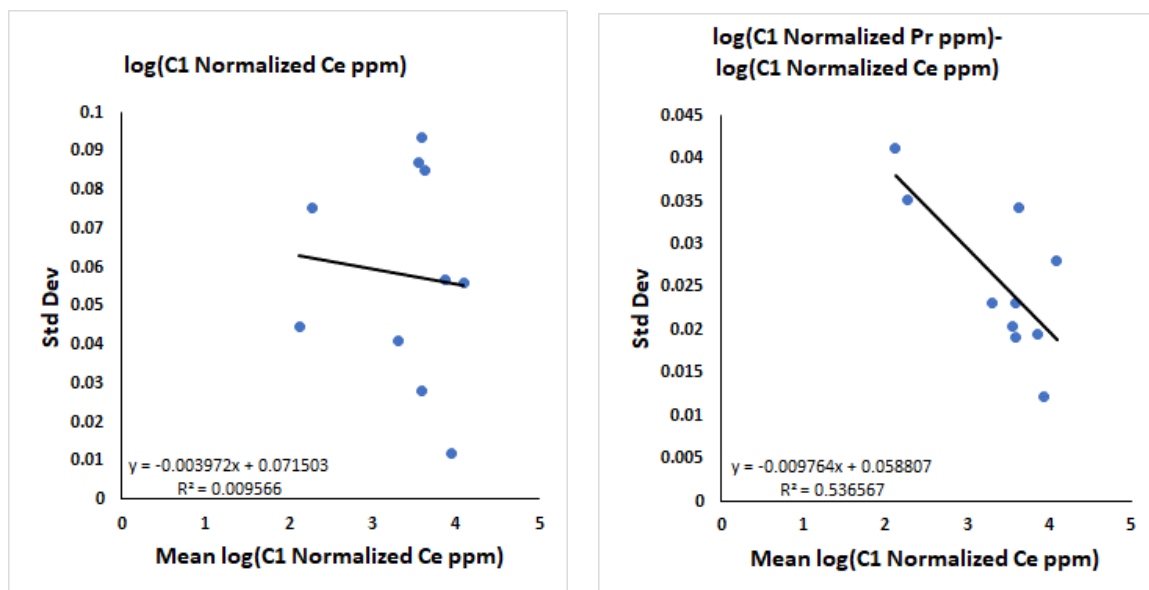

**Figure A5c.** Calibrations of  $\log(\text{C1 Normalized Pr ppm})$  Std Dev and  $\log(\text{C1 Normalized Nd ppm})$ - $\log(\text{C1 Normalized Pr ppm})$  Std Dev versus Mean  $\log(\text{C1 Normalized Pr ppm})$ .

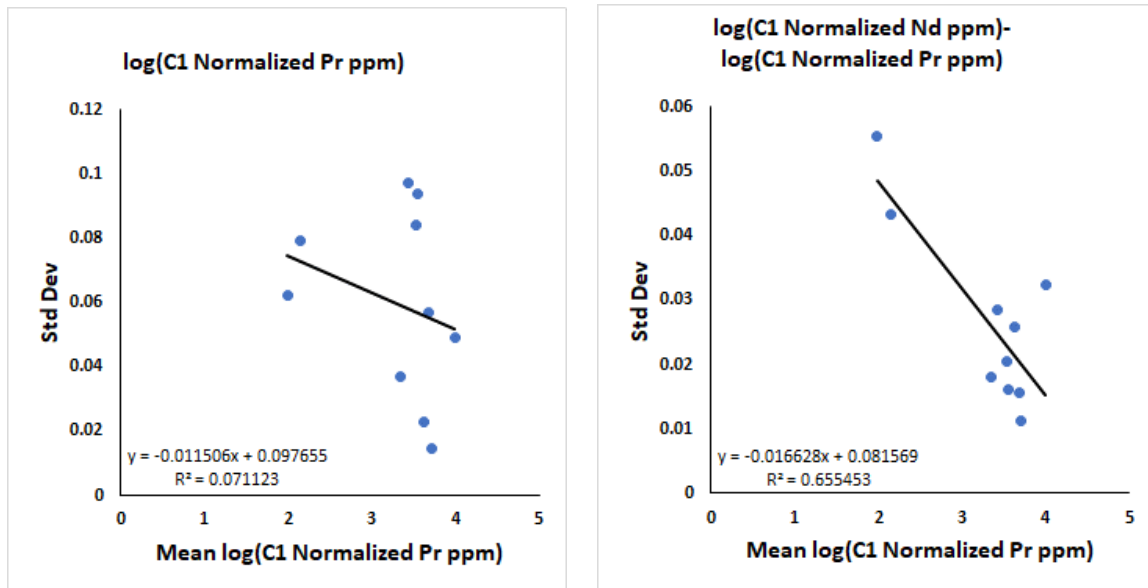

**Figure A5d.** Calibrations of  $\log(\text{C1 Normalized Nd ppm})$  Std Dev and  $\log(\text{C1 Normalized Sm ppm})$ - $\log(\text{C1 Normalized Nd ppm})$  Std Dev versus Mean  $\log(\text{C1 Normalized Nd ppm})$ .

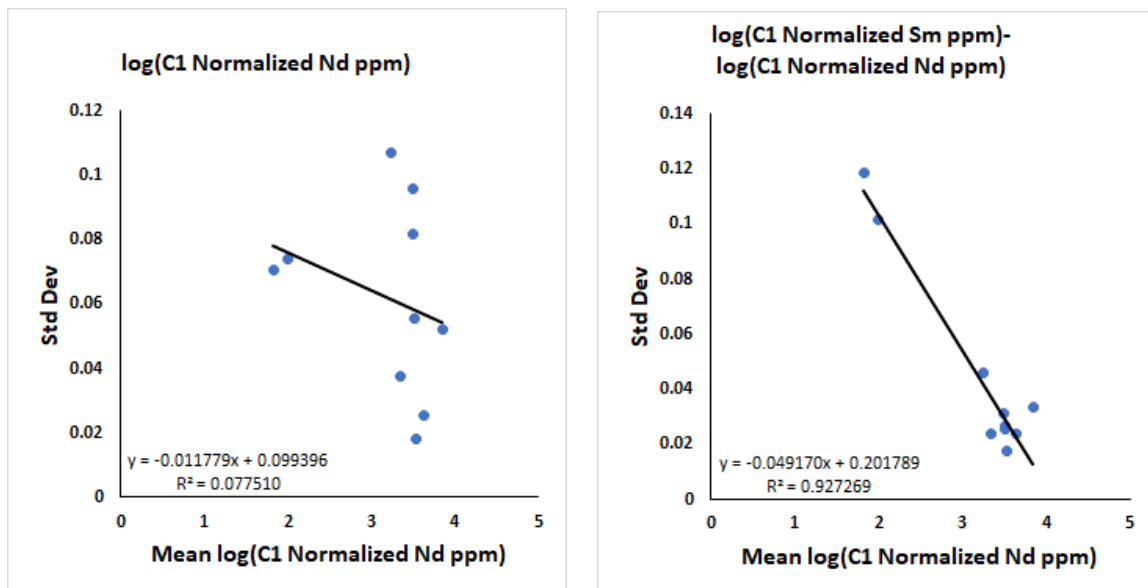

**Figure A5e.** Calibrations of  $\log(\text{C1 Normalized Sm ppm})$  Std Dev and  $\log(\text{C1 Normalized Eu ppm}) - \log(\text{C1 Normalized Sm ppm})$  Std Dev versus Mean  $\log(\text{C1 Normalized Sm ppm})$ .

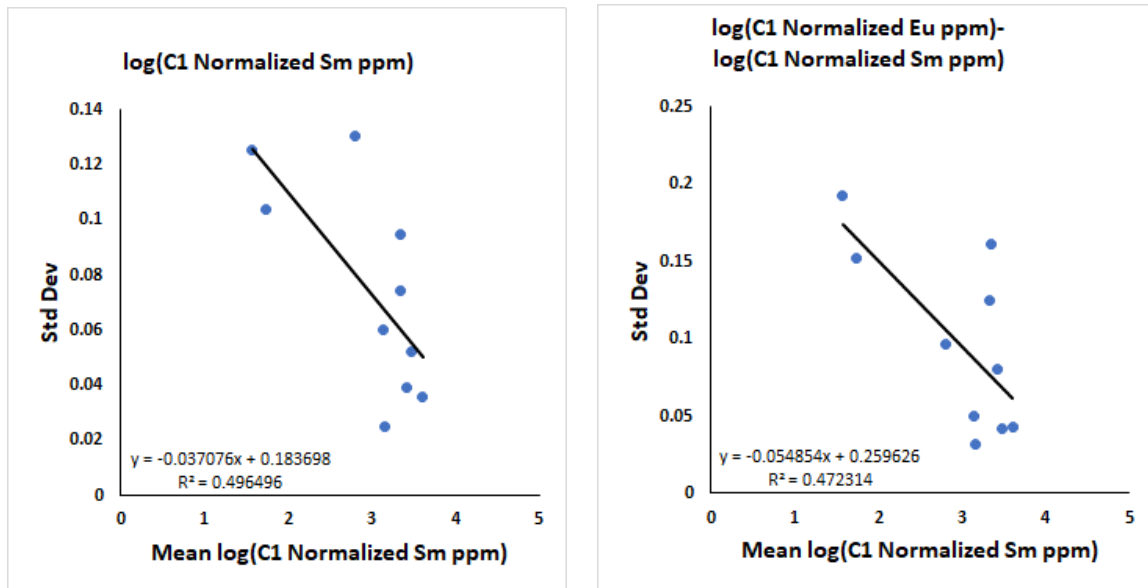

**Figure A5f.** Calibrations of  $\log(\text{C1 Normalized Eu ppm})$  Std Dev and  $\log(\text{C1 Normalized Gd ppm}) - \log(\text{C1 Normalized Eu ppm})$  Std Dev versus Mean  $\log(\text{C1 Normalized Eu ppm})$ .

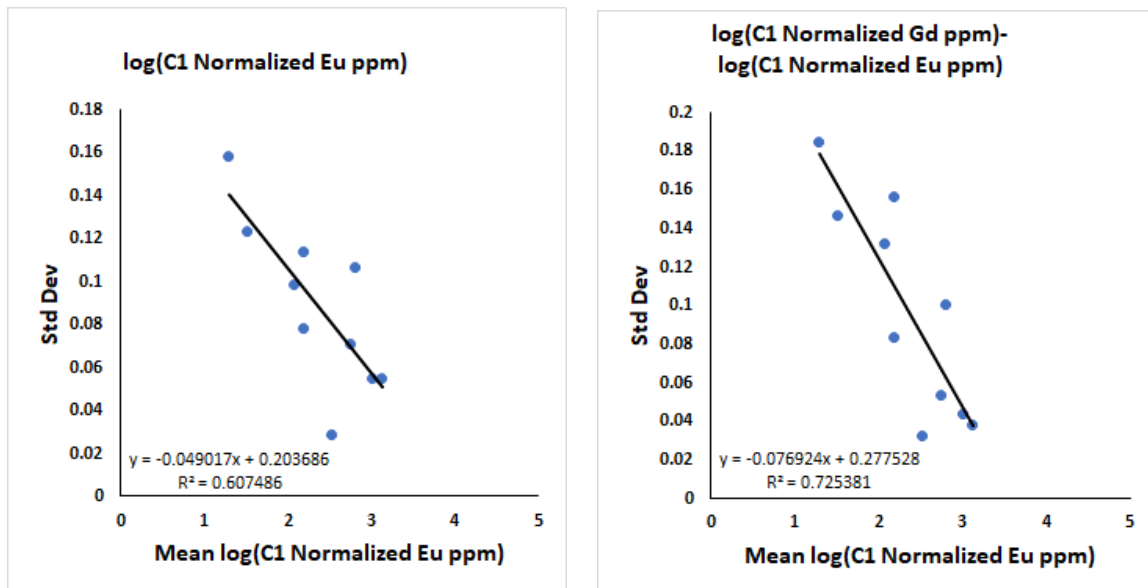

**Figure A5g.** Calibrations of log(C1 Normalized Gd ppm) Std Dev and log(C1 Normalized Tb ppm)-log(C1 Normalized Gd ppm) Std Dev versus Mean log(C1 Normalized Gd ppm).

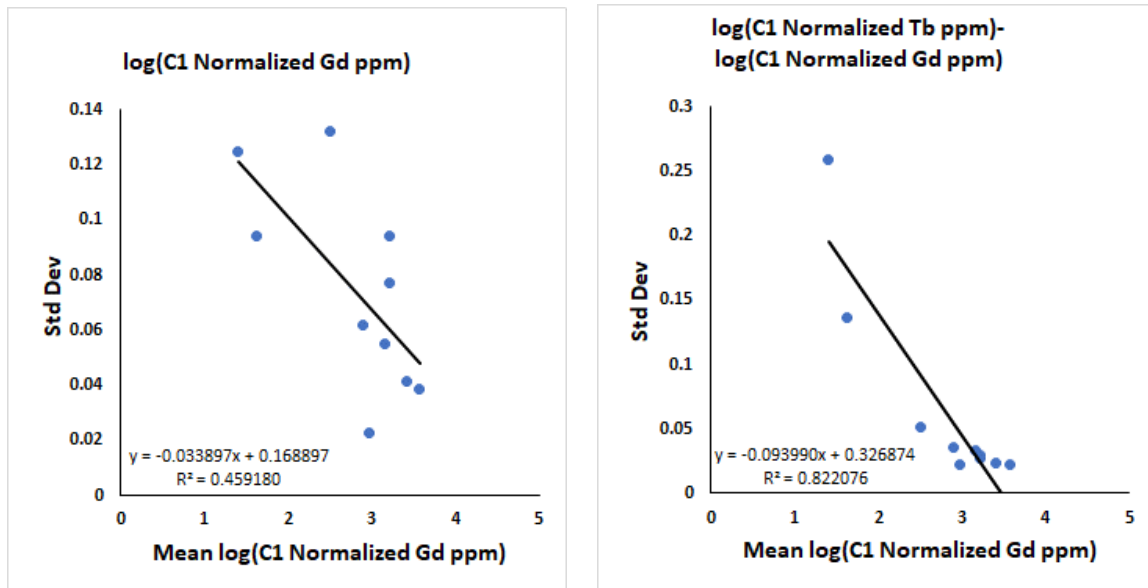

**Figure A5h.** Calibrations of log(C1 Normalized Tb ppm) Std Dev and log(C1 Normalized Dy ppm)-log(C1 Normalized Tb ppm) Std Dev versus Mean log(C1 Normalized Tb ppm).

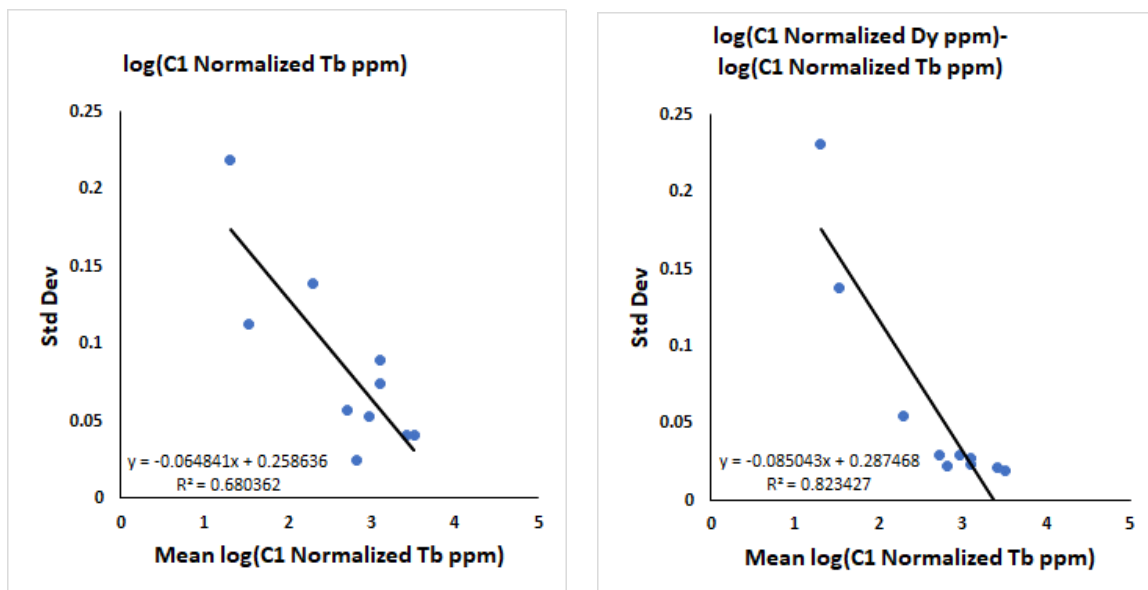

**Figure A5i.** Calibrations of  $\log(\text{C1 Normalized Dy ppm})$  Std Dev and  $\log(\text{C1 Normalized Ho ppm}) - \log(\text{C1 Normalized Dy ppm})$  Std Dev versus Mean  $\log(\text{C1 Normalized Dy ppm})$ .

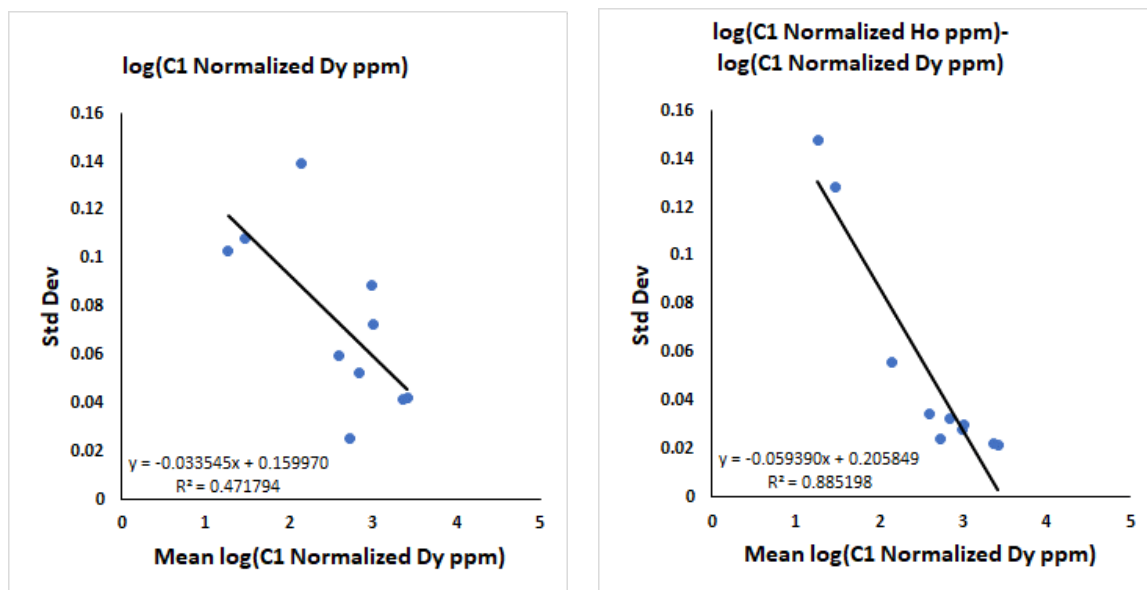

**Figure A5j.** Calibrations of  $\log(\text{C1 Normalized Ho ppm})$  Std Dev and  $\log(\text{C1 Normalized Er ppm}) - \log(\text{C1 Normalized Ho ppm})$  Std Dev versus Mean  $\log(\text{C1 Normalized Ho ppm})$ .

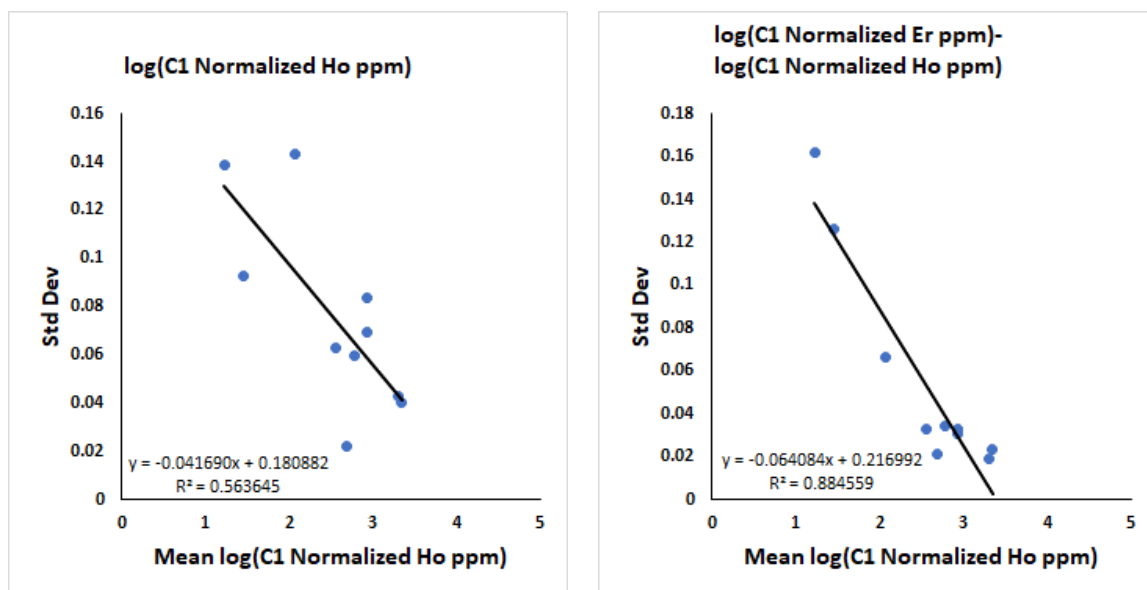

**Figure A5k.** Calibrations of log(C1 Normalized Er ppm) Std Dev and log(C1 Normalized Tm ppm)-log(C1 Normalized Er ppm) Std Dev versus Mean log(C1 Normalized Er ppm).

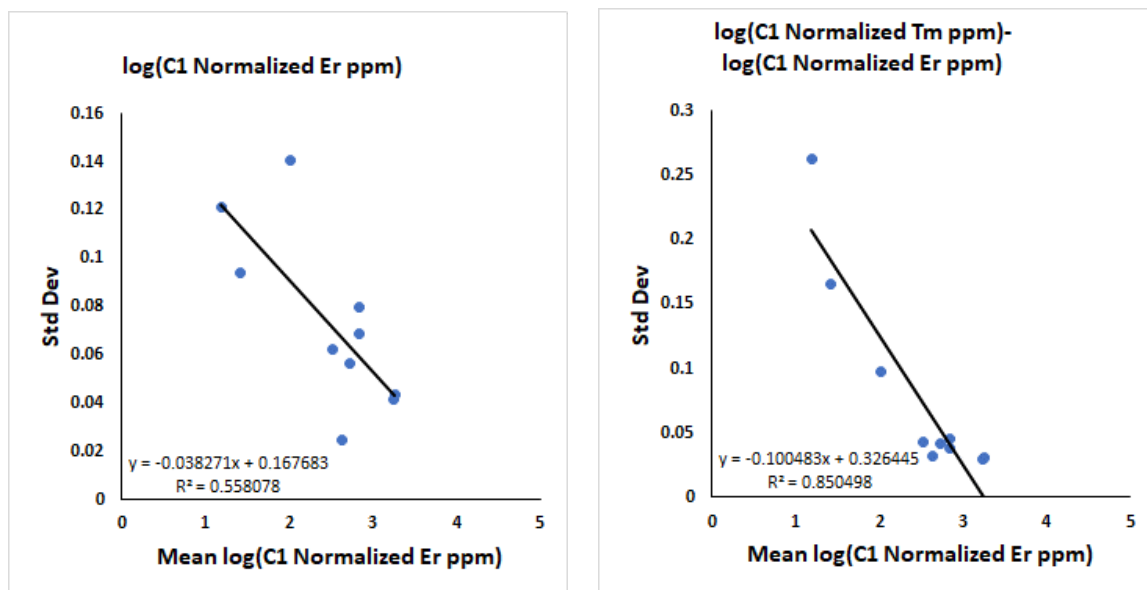

**Figure A5l.** Calibrations of log(C1 Normalized Tm ppm) Std Dev and log(C1 Normalized Yb ppm)-log(C1 Normalized Tm ppm) Std Dev versus Mean log(C1 Normalized Tm ppm).

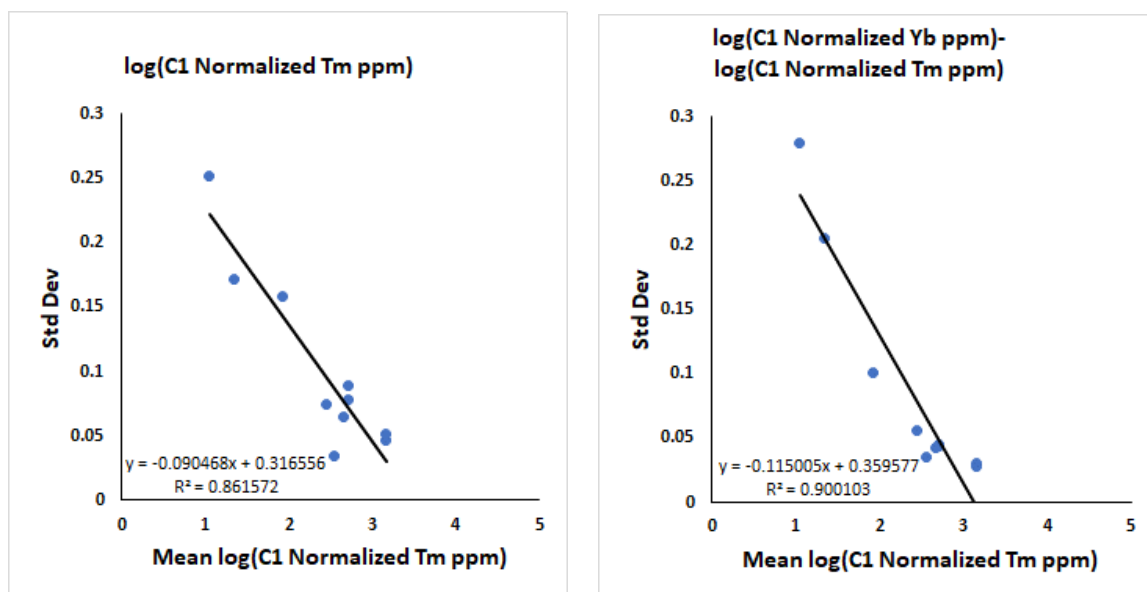

**Figure A5m.** Calibrations of  $\log(\text{C1 Normalized Yb ppm})$  Std Dev and  $\log(\text{C1 Normalized Lu ppm}) - \log(\text{C1 Normalized Yb ppm})$  Std Dev versus Mean  $\log(\text{C1 Normalized Yb ppm})$ .

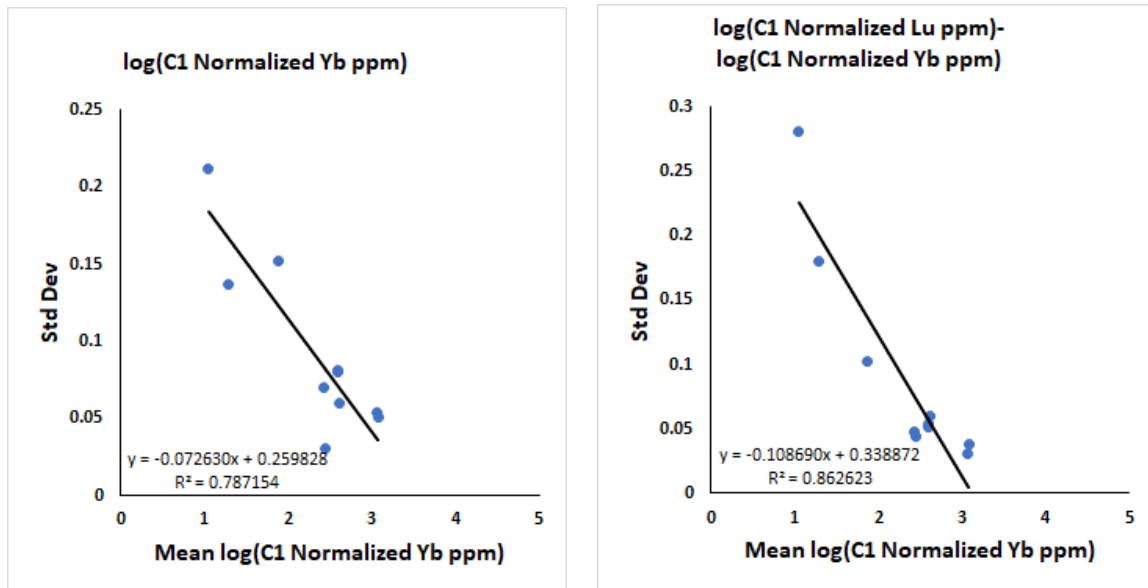

**Figure A5n.** Calibrations of  $\log(\text{C1 Normalized Lu ppm})$  Std Dev and  $\log(\text{C1 Normalized La ppm}) - \log(\text{C1 Normalized Lu ppm})$  Std Dev versus Mean  $\log(\text{C1 Normalized Lu ppm})$ .

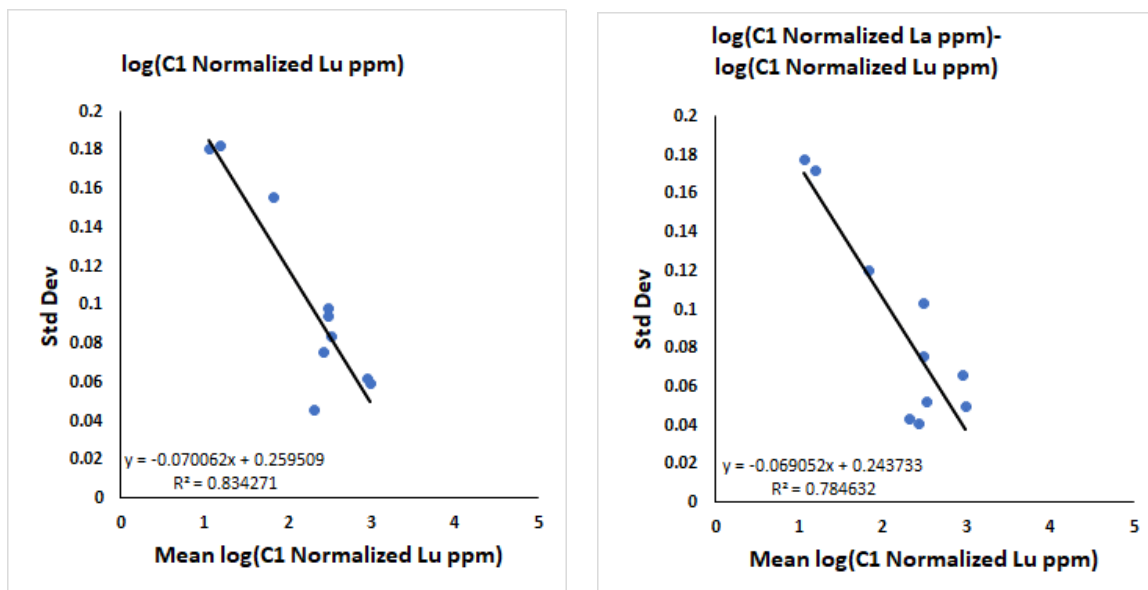

**Figure A5o.** Calibration of  $^{206}\text{Pb}^*/^{238}\text{U}$  Age Std Dev versus Mean  $^{206}\text{Pb}^*/^{238}\text{U}$  Age.

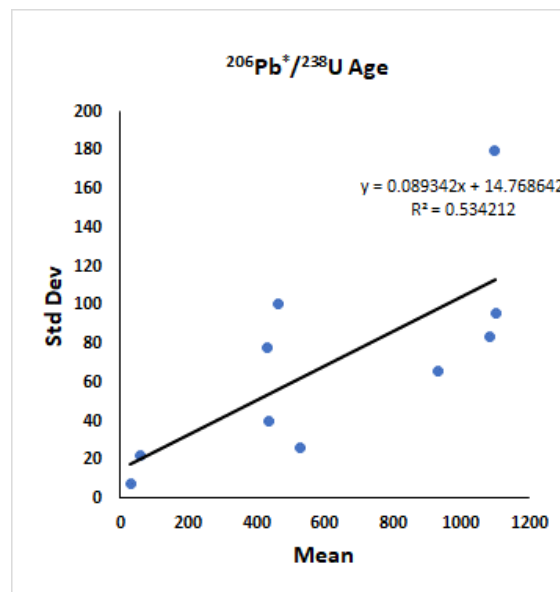

**Table A7.** Statistical analysis of FT-independent data measured for each standard group data used to calibrate the *Sort by Spot* method used in this study.

| log(C1 Normalized La ppm) |                |                   |           |          |                 | log(C1 Normalized Ce ppm)-log(C1 Normalized La ppm) |                           |                |                              |           |           |
|---------------------------|----------------|-------------------|-----------|----------|-----------------|-----------------------------------------------------|---------------------------|----------------|------------------------------|-----------|-----------|
| Standard Group            | Mean ppm value | Std Dev ppm value | Skewness  | Kurtosis | Number of Spots | Standard Group                                      | Mean ppm value Difference | Mean ppm value | Std Dev ppm value Difference | Skewness  | Kurtosis  |
|                           | X              | Y                 |           |          |                 |                                                     |                           | X              | Y                            |           |           |
| AZ                        | 2.201699       | 0.046244          | -0.022268 | 3.343481 | 60of 69         | AZ                                                  | -0.079623                 | 2.201699       | 0.034519                     | 0.528909  | 4.692404  |
| B3                        | 3.458924       | 0.031908          | -0.051845 | 2.776542 | 65 of 66        | B3                                                  | 0.128476                  | 3.458924       | 0.034206                     | 2.444999  | 15.009003 |
| DR+DRG                    | 4.202885       | 0.013145          | -0.570919 | 5.725927 | 230 of 232      | DR+DRG                                              | -0.266737                 | 4.202885       | 0.012690                     | 0.034629  | 5.116578  |
| F5                        | 3.586515       | 0.087132          | 0.823378  | 4.108223 | 102 of 104      | F5                                                  | -0.005023                 | 3.586515       | 0.019385                     | 0.466411  | 3.925589  |
| FC                        | 3.536592       | 0.092991          | 0.250832  | 5.389727 | 61 of 66        | FC                                                  | 0.020886                  | 3.536592       | 0.022458                     | 1.039587  | 5.734459  |
| IF                        | 3.998489       | 0.058491          | -0.073521 | 2.068335 | 54 of 69        | IF                                                  | -0.137953                 | 3.998489       | 0.015347                     | 0.183048  | 3.029001  |
| MM                        | 3.817985       | 0.081000          | 0.203124  | 2.938161 | 264 of 278      | MM                                                  | -0.184827                 | 3.817985       | 0.038788                     | -0.093392 | 3.415949  |
| OL                        | 4.066027       | 0.047896          | -0.783628 | 2.892377 | 69 of 70        | OL                                                  | 0.020049                  | 4.066027       | 0.039035                     | 1.089239  | 4.212498  |
| RA                        | 2.401441       | 0.088014          | 0.756097  | 3.457485 | 67 of 68        | RA                                                  | -0.126580                 | 2.401441       | 0.048914                     | -1.399128 | 8.458202  |
| TI                        | 3.175307       | 0.043482          | 0.651496  | 2.758166 | 65 of 69        | TI                                                  | 0.131615                  | 3.175307       | 0.025451                     | 0.336267  | 2.715640  |
| log(C1 Normalized Ce ppm) |                |                   |           |          |                 | log(C1 Normalized Pr ppm)-log(C1 Normalized Ce ppm) |                           |                |                              |           |           |
| Standard Group            | Mean ppm value | Std Dev ppm value | Skewness  | Kurtosis |                 | Standard Group                                      | Mean ppm value Difference | Mean ppm value | Std Dev ppm value Difference | Skewness  | Kurtosis  |
|                           | X              | Y                 |           |          |                 |                                                     |                           | X              | Y                            |           |           |
| AZ                        | 2.122076       | 0.04478           | 0.479793  | 2.718506 |                 | AZ                                                  | -0.134967                 | 2.122076       | 0.041251                     | 0.129993  | 2.729191  |
| B3                        | 3.587400       | 0.028100          | 0.470046  | 5.804456 |                 | B3                                                  | 0.034101                  | 3.587400       | 0.023179                     | -0.390446 | 6.580905  |
| DR+DRG                    | 3.936148       | 0.012027          | -0.912453 | 5.793841 |                 | DR+DRG                                              | -0.229698                 | 3.936148       | 0.012220                     | -0.340431 | 4.247922  |
| F5                        | 3.581492       | 0.093587          | 0.966811  | 4.201492 |                 | F5                                                  | -0.034078                 | 3.581492       | 0.019157                     | 1.847689  | 11.013196 |
| FC                        | 3.557477       | 0.087284          | 1.047258  | 5.937585 |                 | FC                                                  | -0.028477                 | 3.557477       | 0.020412                     | 0.209345  | 2.284832  |
| IF                        | 3.860536       | 0.056954          | 0.078751  | 1.948518 |                 | IF                                                  | -0.178572                 | 3.860536       | 0.019557                     | 0.125534  | 3.190674  |
| MM                        | 3.633158       | 0.085070          | 0.231555  | 2.915997 |                 | MM                                                  | -0.205644                 | 3.633158       | 0.034251                     | 0.136027  | 2.941075  |
| OL                        | 4.086076       | 0.055892          | -0.214483 | 3.298371 |                 | OL                                                  | -0.093005                 | 4.086076       | 0.028123                     | -0.836177 | 5.591966  |
| RA                        | 2.274861       | 0.075478          | 0.408172  | 3.213564 |                 | RA                                                  | -0.132253                 | 2.274861       | 0.035266                     | 0.372476  | 4.631254  |
| TI                        | 3.306922       | 0.041018          | 0.433578  | 2.943849 |                 | TI                                                  | 0.035495                  | 3.306922       | 0.023204                     | -0.236156 | 3.759432  |
| log(C1 Normalized Pr ppm) |                |                   |           |          |                 | log(C1 Normalized Nd ppm)-log(C1 Normalized Pr ppm) |                           |                |                              |           |           |
| Standard Group            | Mean ppm value | Std Dev ppm value | Skewness  | Kurtosis |                 | Standard Group                                      | Mean ppm value Difference | Mean ppm value | Std Dev ppm value Difference | Skewness  | Kurtosis  |
|                           | X              | Y                 |           |          |                 |                                                     |                           | X              | Y                            |           |           |
| AZ                        | 1.987109       | 0.062395          | 0.045149  | 2.170480 |                 | AZ                                                  | -0.161874                 | 1.987109       | 0.055492                     | 0.005175  | 2.750997  |
| B3                        | 3.621501       | 0.022875          | 0.792644  | 7.514912 |                 | B3                                                  | 0.011994                  | 3.621501       | 0.025834                     | -1.063078 | 4.471554  |
| DR+DRG                    | 3.706450       | 0.014439          | -0.339256 | 4.638296 |                 | DR+DRG                                              | -0.180694                 | 3.706450       | 0.011380                     | -0.252855 | 4.036803  |
| F5                        | 3.547414       | 0.094099          | 1.058282  | 4.418297 |                 | F5                                                  | -0.047949                 | 3.547414       | 0.016014                     | -0.482327 | 3.303655  |
| FC                        | 3.529000       | 0.084222          | 1.226290  | 5.513608 |                 | FC                                                  | -0.039694                 | 3.529000       | 0.020603                     | 0.418617  | 3.057997  |
| IF                        | 3.681964       | 0.056753          | 0.139783  | 1.769328 |                 | IF                                                  | -0.173002                 | 3.681964       | 0.015647                     | 0.741238  | 4.701056  |
| MM                        | 3.427514       | 0.097088          | 0.266936  | 3.164835 |                 | MM                                                  | -0.188397                 | 3.427514       | 0.028450                     | 0.274173  | 3.442389  |
| OL                        | 3.993071       | 0.048901          | -0.586401 | 2.932586 |                 | OL                                                  | -0.149779                 | 3.993071       | 0.032436                     | 0.892378  | 10.138741 |
| RA                        | 2.142607       | 0.079232          | 0.517590  | 2.956901 |                 | RA                                                  | -0.147207                 | 2.142607       | 0.043351                     | -0.461754 | 3.165562  |

|                                  |                |                   |           |          |  |                                                            |                           |                |                              |           |          |
|----------------------------------|----------------|-------------------|-----------|----------|--|------------------------------------------------------------|---------------------------|----------------|------------------------------|-----------|----------|
| TI                               | 3.342417       | 0.037095          | 0.437552  | 2.892957 |  | TI                                                         | 0.001982                  | 3.342417       | 0.018093                     | -0.282901 | 2.822504 |
| <b>log(C1 Normalized Nd ppm)</b> |                |                   |           |          |  | <b>log(C1 Normalized Sm ppm)-log(C1 Normalized Nd ppm)</b> |                           |                |                              |           |          |
| Standard Group                   | Mean ppm value | Std Dev ppm value | Skewness  | Kurtosis |  | Standard Group                                             | Mean ppm value Difference | Mean ppm value | Std Dev ppm value Difference | Skewness  | Kurtosis |
|                                  | X              | Y                 |           |          |  |                                                            |                           | X              | Y                            |           |          |
| AZ                               | 1.825235       | 0.070831          | 0.224472  | 3.582640 |  | AZ                                                         | -0.254665                 | 1.825235       | 0.118726                     | -0.443001 | 4.762856 |
| B3                               | 3.633495       | 0.025620          | 0.182444  | 3.446224 |  | B3                                                         | -0.026239                 | 3.633495       | 0.023984                     | -0.068223 | 3.156565 |
| DR+DRG                           | 3.525756       | 0.017991          | -0.543245 | 3.957297 |  | DR+DRG                                                     | -0.364687                 | 3.525756       | 0.017714                     | -0.486857 | 4.582223 |
| F5                               | 3.499465       | 0.095769          | 1.094837  | 4.544697 |  | F5                                                         | -0.159779                 | 3.499465       | 0.025373                     | -0.027572 | 2.942185 |
| FC                               | 3.489306       | 0.081899          | 1.247070  | 5.085854 |  | FC                                                         | -0.155906                 | 3.489306       | 0.031500                     | -0.035779 | 3.188913 |
| IF                               | 3.508962       | 0.055517          | 0.012748  | 1.997784 |  | IF                                                         | -0.371866                 | 3.508962       | 0.026894                     | 0.505484  | 3.029018 |
| MM                               | 3.239118       | 0.106764          | 0.265973  | 3.015476 |  | MM                                                         | -0.445236                 | 3.239118       | 0.045784                     | -0.102593 | 3.088961 |
| OL                               | 3.843293       | 0.052207          | -0.349143 | 2.488556 |  | OL                                                         | -0.374898                 | 3.843293       | 0.033720                     | -0.460686 | 5.301264 |
| RA                               | 1.995400       | 0.074133          | 0.454106  | 3.514883 |  | RA                                                         | -0.254118                 | 1.995400       | 0.101718                     | -0.208390 | 3.609066 |
| TI                               | 3.344400       | 0.037427          | 0.595754  | 3.656231 |  | TI                                                         | 0.069628                  | 3.344400       | 0.023742                     | -1.050116 | 5.487454 |
| <b>log(C1 Normalized Sm ppm)</b> |                |                   |           |          |  | <b>log(C1 Normalized Eu ppm)-log(C1 Normalized Sm ppm)</b> |                           |                |                              |           |          |
| Standard Group                   | Mean ppm value | Std Dev ppm value | Skewness  | Kurtosis |  | Standard Group                                             | Mean ppm value Difference | Mean ppm value | Std Dev ppm value Difference | Skewness  | Kurtosis |
|                                  | X              | Y                 |           |          |  |                                                            |                           | X              | Y                            |           |          |
| AZ                               | 1.570570       | 0.125534          | -0.282204 | 4.304985 |  | AZ                                                         | -0.281043                 | 1.570570       | 0.192502                     | 0.263942  | 4.559305 |
| B3                               | 3.607256       | 0.035526          | -0.010442 | 2.950545 |  | B3                                                         | -0.597763                 | 3.607256       | 0.042836                     | -0.221475 | 3.025124 |
| DR+DRG                           | 3.161069       | 0.024880          | -0.855749 | 6.262916 |  | DR+DRG                                                     | -0.635166                 | 3.161069       | 0.031522                     | 0.283756  | 4.015454 |
| F5                               | 3.339686       | 0.094931          | 1.152548  | 4.329620 |  | F5                                                         | -1.158573                 | 3.339686       | 0.161358                     | -0.299162 | 2.930588 |
| FC                               | 3.333400       | 0.074279          | 0.980049  | 4.198285 |  | FC                                                         | -1.262733                 | 3.333400       | 0.125260                     | 0.279883  | 3.059927 |
| IF                               | 3.137096       | 0.059871          | 0.006172  | 2.390625 |  | IF                                                         | -0.389919                 | 3.137096       | 0.050322                     | -1.634226 | 7.585874 |
| MM                               | 2.793881       | 0.130507          | 0.135986  | 3.125189 |  | MM                                                         | 0.001906                  | 2.793881       | 0.096924                     | -0.210364 | 2.813050 |
| OL                               | 3.468395       | 0.052103          | -0.406632 | 2.595706 |  | OL                                                         | -0.346296                 | 3.468395       | 0.041509                     | 0.564634  | 6.259212 |
| RA                               | 1.741283       | 0.103915          | -0.270439 | 3.774121 |  | RA                                                         | -0.225013                 | 1.741283       | 0.151877                     | 0.392989  | 3.759978 |
| TI                               | 3.414028       | 0.039224          | 0.262813  | 3.130264 |  | TI                                                         | -1.231274                 | 3.414028       | 0.080311                     | -0.261020 | 7.308839 |
| <b>log(C1 Normalized Eu ppm)</b> |                |                   |           |          |  | <b>log(C1 Normalized Gd ppm)-log(C1 Normalized Eu ppm)</b> |                           |                |                              |           |          |
| Standard Group                   | Mean ppm value | Std Dev ppm value | Skewness  | Kurtosis |  | Standard Group                                             | Mean ppm value Difference | Mean ppm value | Std Dev ppm value Difference | Skewness  | Kurtosis |
|                                  | X              | Y                 |           |          |  |                                                            |                           | X              | Y                            |           |          |
| AZ                               | 1.289527       | 0.158090          | -0.717352 | 2.912967 |  | AZ                                                         | 0.113963                  | 1.289527       | 0.184925                     | -0.258565 | 2.750370 |
| B3                               | 3.009493       | 0.055087          | -0.259447 | 2.312157 |  | B3                                                         | 0.559117                  | 3.009493       | 0.043943                     | 0.082708  | 2.913210 |
| DR+DRG                           | 2.525903       | 0.028479          | -0.261268 | 3.012110 |  | DR+DRG                                                     | 0.446259                  | 2.525903       | 0.032333                     | 0.398806  | 3.550326 |
| F5                               | 2.181114       | 0.113798          | -0.040270 | 3.778793 |  | F5                                                         | 1.035603                  | 2.181114       | 0.156517                     | 0.260387  | 3.110038 |
| FC                               | 2.070667       | 0.098545          | 0.542931  | 3.684750 |  | FC                                                         | 1.144076                  | 2.070667       | 0.132127                     | -0.403482 | 2.958674 |
| IF                               | 2.747177       | 0.071164          | -0.105031 | 2.581214 |  | IF                                                         | 0.140785                  | 2.747177       | 0.053598                     | 1.697645  | 8.674565 |
| MM                               | 2.795787       | 0.106354          | 0.073558  | 2.682140 |  | MM                                                         | -0.288349                 | 2.795787       | 0.100859                     | 0.286236  | 2.870302 |
| OL                               | 3.122098       | 0.055035          | -0.701602 | 3.831840 |  | OL                                                         | 0.030326                  | 3.122098       | 0.038088                     | -0.779213 | 5.764501 |
| RA                               | 1.516269       | 0.123034          | 0.524767  | 2.782434 |  | RA                                                         | 0.102146                  | 1.516269       | 0.146481                     | 0.101887  | 2.673823 |
| TI                               | 2.182754       | 0.078289          | 0.114989  | 4.372599 |  | TI                                                         | 1.224221                  | 2.182754       | 0.083245                     | -0.070464 | 4.566405 |

| log(C1 Normalized Gd ppm) |                |                   |           |           |  | log(C1 Normalized Tb ppm)-log(C1 Normalized Gd ppm) |                           |                |                              |            |           |
|---------------------------|----------------|-------------------|-----------|-----------|--|-----------------------------------------------------|---------------------------|----------------|------------------------------|------------|-----------|
| Standard Group            | Mean ppm value | Std Dev ppm value | Skewness  | Kurtosis  |  | Standard Group                                      | Mean ppm value Difference | Mean ppm value | Std Dev ppm value Difference | Skewness   | Kurtosis  |
|                           | X              | Y                 |           |           |  |                                                     |                           | X              | Y                            |            |           |
| AZ                        | 1.403490       | 0.125031          | -0.241026 | 3.423925  |  | AZ                                                  | -0.091021                 | 1.403490       | 0.258775                     | -3.146225  | 18.950501 |
| B3                        | 3.568610       | 0.038707          | -0.049184 | 2.566831  |  | B3                                                  | -0.064035                 | 3.568610       | 0.021804                     | 0.147096   | 3.227282  |
| DR+DRG                    | 2.972161       | 0.022526          | -0.357690 | 4.121550  |  | DR+DRG                                              | -0.146768                 | 2.972161       | 0.022862                     | -0.256168  | 3.810125  |
| F5                        | 3.216717       | 0.093919          | 1.388502  | 5.314749  |  | F5                                                  | -0.113098                 | 3.216717       | 0.029422                     | -0.533082  | 2.643364  |
| FC                        | 3.214743       | 0.077143          | 0.591067  | 3.869151  |  | FC                                                  | -0.109137                 | 3.214743       | 0.027532                     | -0.116538  | 3.525221  |
| IF                        | 2.887962       | 0.061659          | 0.038966  | 2.067069  |  | IF                                                  | -0.173667                 | 2.887962       | 0.035928                     | 0.169383   | 3.451471  |
| MM                        | 2.507439       | 0.132046          | 0.219431  | 3.177865  |  | MM                                                  | -0.216691                 | 2.507439       | 0.051686                     | -0.348078  | 3.501691  |
| OL                        | 3.152424       | 0.054820          | -0.054520 | 2.323043  |  | OL                                                  | -0.178455                 | 3.152424       | 0.033313                     | -0.10156   | 4.388082  |
| RA                        | 1.618415       | 0.094196          | -0.095453 | 3.226383  |  | RA                                                  | -0.083338                 | 1.618415       | 0.136333                     | 0.437034   | 5.328563  |
| TI                        | 3.406975       | 0.041546          | -0.094443 | 2.393169  |  | TI                                                  | 0.011417                  | 3.406975       | 0.024157                     | -0.320351  | 2.543995  |
| log(C1 Normalized Tb ppm) |                |                   |           |           |  | log(C1 Normalized Dy ppm)-log(C1 Normalized Tb ppm) |                           |                |                              |            |           |
| Standard Group            | Mean ppm value | Std Dev ppm value | Skewness  | Kurtosis  |  | Standard Group                                      | Mean ppm value Difference | Mean ppm value | Std Dev ppm value Difference | Skewness   | Kurtosis  |
|                           | X              | Y                 |           |           |  |                                                     |                           | X              | Y                            |            |           |
| AZ                        | 1.312469       | 0.218908          | -3.815626 | 24.695964 |  | AZ                                                  | -0.046503                 | 1.312469       | 0.231317                     | 3.720014   | 24.388341 |
| B3                        | 3.504575       | 0.041076          | -0.342420 | 2.668212  |  | B3                                                  | -0.090343                 | 3.504575       | 0.0195100                    | 0.649282   | 4.125593  |
| DR+DRG                    | 2.825393       | 0.024504          | -1.217514 | 8.862386  |  | DR+DRG                                              | -0.104714                 | 2.825393       | 0.022355                     | -0.306039  | 3.775116  |
| F5                        | 3.103618       | 0.089810          | 1.112972  | 4.610453  |  | F5                                                  | -0.112167                 | 3.103618       | 0.027486                     | 0.137415   | 2.348547  |
| FC                        | 3.105607       | 0.074029          | 0.595077  | 3.747882  |  | FC                                                  | -0.105937                 | 3.105607       | 0.023337                     | 0.139144   | 3.307039  |
| IF                        | 2.714295       | 0.056874          | 0.143015  | 2.286232  |  | IF                                                  | -0.117390                 | 2.714295       | 0.029741                     | -0.216047  | 2.711791  |
| MM                        | 2.290747       | 0.138612          | 0.192569  | 2.846805  |  | MM                                                  | -0.140196                 | 2.290747       | 0.05484                      | 0.014105   | 2.837923  |
| OL                        | 2.973969       | 0.053021          | -0.104359 | 2.568734  |  | OL                                                  | -0.138837                 | 2.973969       | 0.029261                     | -0.063693  | 3.491082  |
| RA                        | 1.535077       | 0.112214          | 0.047890  | 3.741380  |  | RA                                                  | -0.059548                 | 1.535077       | 0.137383                     | -0.596599  | 4.295193  |
| TI                        | 3.418392       | 0.040589          | 0.308978  | 3.173600  |  | TI                                                  | -0.057115                 | 3.418392       | 0.021646                     | -0.2108700 | 4.072596  |
| log(C1 Normalized Dy ppm) |                |                   |           |           |  | log(C1 Normalized Ho ppm)-log(C1 Normalized Dy ppm) |                           |                |                              |            |           |
| Standard Group            | Mean ppm value | Std Dev ppm value | Skewness  | Kurtosis  |  | Standard Group                                      | Mean ppm value Difference | Mean ppm value | Std Dev ppm value Difference | Skewness   | Kurtosis  |
|                           | X              | Y                 |           |           |  |                                                     |                           | X              | Y                            |            |           |
| AZ                        | 1.265966       | 0.103094          | -0.274031 | 3.200534  |  | AZ                                                  | -0.041303                 | 1.265966       | 0.147938                     | -0.508023  | 4.129376  |
| B3                        | 3.414232       | 0.041840          | -0.243339 | 3.068468  |  | B3                                                  | -0.068555                 | 3.414232       | 0.021882                     | 0.203849   | 3.232079  |
| DR+DRG                    | 2.720679       | 0.025401          | -1.584397 | 8.633440  |  | DR+DRG                                              | -0.038226                 | 2.720679       | 0.023977                     | 0.176840   | 3.823760  |
| F5                        | 2.991451       | 0.089078          | 1.015779  | 4.407444  |  | F5                                                  | -0.064873                 | 2.991451       | 0.027939                     | 0.114507   | 2.460153  |
| FC                        | 2.999670       | 0.072886          | 0.620719  | 3.471470  |  | FC                                                  | -0.068801                 | 2.999670       | 0.030127                     | -0.068047  | 2.815019  |
| IF                        | 2.596905       | 0.059646          | 0.215758  | 2.319753  |  | IF                                                  | -0.037134                 | 2.596905       | 0.034271                     | 0.180692   | 2.544695  |
| MM                        | 2.150551       | 0.139094          | 0.066002  | 3.134507  |  | MM                                                  | -0.073485                 | 2.150551       | 0.056236                     | 0.095587   | 3.497979  |
| OL                        | 2.835132       | 0.052724          | 0.185229  | 2.671042  |  | OL                                                  | -0.064513                 | 2.835132       | 0.032724                     | -0.438281  | 4.125768  |
| RA                        | 1.475529       | 0.108550          | -0.818145 | 6.757860  |  | RA                                                  | -0.022778                 | 1.475529       | 0.128442                     | 0.391251   | 3.352550  |
| TI                        | 3.361276       | 0.041547          | 0.723527  | 3.587832  |  | TI                                                  | -0.049533                 | 3.361276       | 0.022027                     | -0.401690  | 2.769236  |
| log(C1 Normalized Ho ppm) |                |                   |           |           |  | log(C1 Normalized Er ppm)-log(C1 Normalized Ho ppm) |                           |                |                              |            |           |

| Standard Group                   | Mean ppm value | Std Dev ppm value | Skewness  | Kurtosis |  | Standard Group                                             | Mean ppm value Difference | Mean ppm value | Std Dev ppm value Difference | Skewness  | Kurtosis |
|----------------------------------|----------------|-------------------|-----------|----------|--|------------------------------------------------------------|---------------------------|----------------|------------------------------|-----------|----------|
|                                  | X              | Y                 |           |          |  |                                                            |                           | X              | Y                            |           |          |
| AZ                               | 1.224663       | 0.138664          | -0.587587 | 3.809946 |  | AZ                                                         | -0.038490                 | 1.224663       | 0.162274                     | 0.968648  | 6.164729 |
| B3                               | 3.345678       | 0.039988          | 0.037681  | 3.231239 |  | B3                                                         | -0.084675                 | 3.345678       | 0.023720                     | 0.320315  | 4.185521 |
| DR+DRG                           | 2.682453       | 0.021882          | -1.079063 | 7.752156 |  | DR+DRG                                                     | -0.050822                 | 2.682453       | 0.021462                     | -0.205169 | 3.257285 |
| F5                               | 2.926578       | 0.083767          | 0.870371  | 4.182361 |  | F5                                                         | -0.094690                 | 2.926578       | 0.032994                     | -0.155774 | 3.276571 |
| FC                               | 2.930869       | 0.069269          | 0.216383  | 2.838755 |  | FC                                                         | -0.089612                 | 2.930869       | 0.030537                     | -0.269426 | 3.982452 |
| IF                               | 2.559771       | 0.062749          | -0.354235 | 2.282233 |  | IF                                                         | -0.042176                 | 2.559771       | 0.032900                     | -0.128688 | 2.607587 |
| MM                               | 2.077066       | 0.143473          | -0.042210 | 2.885431 |  | MM                                                         | -0.063749                 | 2.077066       | 0.066035                     | 0.392193  | 4.065565 |
| OL                               | 2.770619       | 0.059764          | -0.291171 | 2.366037 |  | OL                                                         | -0.048946                 | 2.770619       | 0.034560                     | -0.655716 | 5.316139 |
| RA                               | 1.452751       | 0.092595          | -0.058839 | 2.466869 |  | RA                                                         | -0.043239                 | 1.452751       | 0.125970                     | -0.526226 | 2.607951 |
| TI                               | 3.311744       | 0.042651          | 0.454877  | 3.153271 |  | TI                                                         | -0.070163                 | 3.311744       | 0.019282                     | -0.718034 | 3.545054 |
| <b>log(C1 Normalized Er ppm)</b> |                |                   |           |          |  | <b>log(C1 Normalized Tm ppm)-log(C1 Normalized Er ppm)</b> |                           |                |                              |           |          |
| Standard Group                   | Mean ppm value | Std Dev ppm value | Skewness  | Kurtosis |  | Standard Group                                             | Mean ppm value Difference | Mean ppm value | Std Dev ppm value Difference | Skewness  | Kurtosis |
|                                  | X              | Y                 |           |          |  |                                                            |                           | X              | Y                            |           |          |
| AZ                               | 1.186173       | 0.121382          | 0.017720  | 2.903962 |  | AZ                                                         | -0.137433                 | 1.186173       | 0.263163                     | -1.201998 | 5.722339 |
| B3                               | 3.261003       | 0.043580          | -0.146581 | 3.236518 |  | B3                                                         | -0.100687                 | 3.261003       | 0.030611                     | 0.375062  | 3.865160 |
| DR+DRG                           | 2.631631       | 0.024739          | -0.977908 | 8.912819 |  | DR+DRG                                                     | -0.085472                 | 2.631631       | 0.032074                     | -0.806650 | 5.882681 |
| F5                               | 2.831889       | 0.079592          | 0.683513  | 4.764481 |  | F5                                                         | -0.122178                 | 2.831889       | 0.044857                     | 0.240610  | 3.536381 |
| FC                               | 2.841257       | 0.068825          | 0.594431  | 3.500222 |  | FC                                                         | -0.132043                 | 2.841257       | 0.038728                     | 0.508831  | 5.600556 |
| IF                               | 2.517595       | 0.062209          | 0.039217  | 2.234221 |  | IF                                                         | -0.065379                 | 2.517595       | 0.042447                     | 0.881103  | 4.043246 |
| MM                               | 2.013317       | 0.140472          | -0.164793 | 2.716814 |  | MM                                                         | -0.084654                 | 2.013317       | 0.097149                     | -0.396223 | 4.411128 |
| OL                               | 2.721673       | 0.056671          | -0.119052 | 2.549243 |  | OL                                                         | -0.062214                 | 2.721673       | 0.042026                     | 0.395948  | 3.815910 |
| RA                               | 1.409512       | 0.094261          | 0.075734  | 2.611391 |  | RA                                                         | -0.068370                 | 1.409512       | 0.165671                     | -0.591526 | 3.978743 |
| TI                               | 3.241581       | 0.041504          | 0.474783  | 2.559871 |  | TI                                                         | -0.088572                 | 3.241581       | 0.030245                     | -0.083882 | 3.539651 |
| <b>log(C1 Normalized Tm ppm)</b> |                |                   |           |          |  | <b>log(C1 Normalized Yb ppm)-log(C1 Normalized Tm ppm)</b> |                           |                |                              |           |          |
| Standard Group                   | Mean ppm value | Std Dev ppm value | Skewness  | Kurtosis |  | Standard Group                                             | Mean ppm value Difference | Mean ppm value | Std Dev ppm value Difference | Skewness  | Kurtosis |
|                                  | X              | Y                 |           |          |  |                                                            |                           | X              | Y                            |           |          |
| AZ                               | 1.048740       | 0.252116          | -1.819842 | 8.135960 |  | AZ                                                         | -0.002282                 | 1.048740       | 0.279954                     | 0.817380  | 4.252999 |
| B3                               | 3.160316       | 0.046638          | -0.373609 | 3.284162 |  | B3                                                         | -0.082970                 | 3.160316       | 0.030793                     | 0.135406  | 2.597889 |
| DR+DRG                           | 2.546159       | 0.034548          | -1.310714 | 7.255522 |  | DR+DRG                                                     | -0.101628                 | 2.546159       | 0.035352                     | 0.453226  | 3.388518 |
| F5                               | 2.709711       | 0.089010          | 0.566071  | 4.942674 |  | F5                                                         | -0.121839                 | 2.709711       | 0.044089                     | -0.130820 | 2.998602 |
| FC                               | 2.709213       | 0.077628          | 0.614479  | 3.292091 |  | FC                                                         | -0.116110                 | 2.709213       | 0.045320                     | -0.024726 | 3.069926 |
| IF                               | 2.452216       | 0.074028          | 0.056378  | 3.342935 |  | IF                                                         | -0.029927                 | 2.452216       | 0.056152                     | 0.321305  | 3.126822 |
| MM                               | 1.928664       | 0.158882          | -0.500025 | 3.120559 |  | MM                                                         | -0.053688                 | 1.928664       | 0.101469                     | 0.160726  | 3.566791 |
| OL                               | 2.659460       | 0.064961          | -0.439708 | 2.707215 |  | OL                                                         | -0.052127                 | 2.659460       | 0.042482                     | 0.161598  | 2.588971 |
| RA                               | 1.341143       | 0.171069          | -1.207406 | 5.242085 |  | RA                                                         | -0.055524                 | 1.341143       | 0.205866                     | 0.347425  | 4.731613 |
| TI                               | 3.153008       | 0.051820          | 0.312654  | 2.689064 |  | TI                                                         | -0.090310                 | 3.153008       | 0.027672                     | 0.252527  | 2.648481 |
| <b>log(C1 Normalized Yb ppm)</b> |                |                   |           |          |  | <b>log(C1 Normalized Lu ppm)-log(C1 Normalized Yb ppm)</b> |                           |                |                              |           |          |
| Standard                         | Mean           | Std Dev           | Skewness  | Kurtosis |  | Standard                                                   | Mean                      | Mean           | Std Dev                      | Skewness  | Kurtosis |

| Group                                       | ppm value<br>X         | ppm value<br>Y            |           |           |  | Group                                                      | ppm value<br>Difference         | ppm value<br>X         | ppm value<br>Difference<br>Y            |           |           |
|---------------------------------------------|------------------------|---------------------------|-----------|-----------|--|------------------------------------------------------------|---------------------------------|------------------------|-----------------------------------------|-----------|-----------|
| AZ                                          | 1.046458               | 0.211479                  | -2.007626 | 12.239161 |  | AZ                                                         | 0.015030                        | 1.046458               | 0.280625                                | 2.920491  | 18.495256 |
| B3                                          | 3.077347               | 0.050687                  | -0.726160 | 4.508901  |  | B3                                                         | -0.093608                       | 3.077347               | 0.038469                                | 0.310334  | 5.506467  |
| DR+DRG                                      | 2.444530               | 0.030382                  | -1.108472 | 7.040707  |  | DR+DRG                                                     | -0.123516                       | 2.444530               | 0.043694                                | -0.122795 | 3.585642  |
| F5                                          | 2.587871               | 0.081212                  | 0.098655  | 3.968271  |  | F5                                                         | -0.101333                       | 2.587871               | 0.052102                                | -0.384490 | 3.370479  |
| FC                                          | 2.593103               | 0.080208                  | -0.102538 | 2.942924  |  | FC                                                         | -0.112896                       | 2.593103               | 0.053376                                | -0.668800 | 3.014233  |
| IF                                          | 2.422288               | 0.070269                  | 0.275071  | 2.796104  |  | IF                                                         | 0.001402                        | 2.422288               | 0.047590                                | -0.171031 | 2.393716  |
| MM                                          | 1.874976               | 0.152168                  | -0.314615 | 3.041734  |  | MM                                                         | -0.038245                       | 1.874976               | 0.101945                                | -0.155482 | 3.410037  |
| OL                                          | 2.607332               | 0.060148                  | -0.420081 | 2.983395  |  | OL                                                         | -0.087149                       | 2.607332               | 0.059575                                | -1.284071 | 6.095363  |
| RA                                          | 1.285618               | 0.136944                  | -1.350280 | 5.251219  |  | RA                                                         | -0.095444                       | 1.285618               | 0.180335                                | -0.933407 | 4.424260  |
| TI                                          | 3.062698               | 0.054140                  | 0.286877  | 2.848689  |  | TI                                                         | -0.111143                       | 3.062698               | 0.030894                                | -0.273867 | 2.532939  |
| <b>log(C1 Normalized Lu ppm)</b>            |                        |                           |           |           |  | <b>log(C1 Normalized La ppm)-log(C1 Normalized Lu ppm)</b> |                                 |                        |                                         |           |           |
| Standard<br>Group                           | Mean<br>ppm value<br>X | Std Dev<br>ppm value<br>Y | Skewness  | Kurtosis  |  | Standard<br>Group                                          | Mean<br>ppm value<br>Difference | Mean<br>ppm value<br>X | Std Dev<br>ppm value<br>Difference<br>Y | Skewness  | Kurtosis  |
| AZ                                          | 1.061488               | 0.180756                  | -0.335604 | 4.800937  |  | AZ                                                         | 1.140212                        | 1.061488               | 0.178011                                | -0.041518 | 5.231978  |
| B3                                          | 2.983739               | 0.059048                  | -0.446941 | 4.118339  |  | B3                                                         | 0.475185                        | 2.983739               | 0.049493                                | 0.035465  | 4.609405  |
| DR+DRG                                      | 2.321014               | 0.045922                  | -1.050440 | 7.164176  |  | DR+DRG                                                     | 1.881871                        | 2.321014               | 0.043115                                | 0.625514  | 5.287978  |
| F5                                          | 2.486538               | 0.094058                  | 0.525878  | 4.376093  |  | F5                                                         | 1.099977                        | 2.486538               | 0.075795                                | 0.051766  | 2.730228  |
| FC                                          | 2.480207               | 0.097969                  | -0.128296 | 2.726698  |  | FC                                                         | 1.056385                        | 2.480207               | 0.103132                                | -0.777608 | 4.551685  |
| IF                                          | 2.423690               | 0.075200                  | 0.084211  | 2.577375  |  | IF                                                         | 1.574799                        | 2.423690               | 0.040555                                | -0.056425 | 2.482326  |
| MM                                          | 1.836731               | 0.155358                  | -0.220915 | 3.323592  |  | MM                                                         | 1.981254                        | 1.836731               | 0.120377                                | 0.413549  | 3.771992  |
| OL                                          | 2.520183               | 0.083440                  | -0.597115 | 2.768056  |  | OL                                                         | 1.545844                        | 2.520183               | 0.052265                                | 0.779917  | 4.490300  |
| RA                                          | 1.190174               | 0.182342                  | -1.265120 | 5.004484  |  | RA                                                         | 1.211267                        | 1.190174               | 0.171689                                | 1.392987  | 5.295107  |
| TI                                          | 2.951555               | 0.061750                  | 0.337456  | 3.170824  |  | TI                                                         | 0.223752                        | 2.951555               | 0.066127                                | 0.417713  | 4.359916  |
| <b><sup>206</sup>Pb/<sup>238</sup>U Age</b> |                        |                           |           |           |  |                                                            |                                 |                        |                                         |           |           |
| Standard<br>Group                           | Mean<br>Age<br>X       | Std Dev<br>Age<br>Y       | Skewness  | Kurtosis  |  |                                                            |                                 |                        |                                         |           |           |
| AZ                                          | 436.427150             | 39.743240                 | 0.153149  | 5.656543  |  |                                                            |                                 |                        |                                         |           |           |
| B3                                          | 1099.752463            | 179.896369                | -3.487869 | 24.340297 |  |                                                            |                                 |                        |                                         |           |           |
| DR+DRG                                      | 31.109140              | 7.604816                  | -0.328023 | 3.148634  |  |                                                            |                                 |                        |                                         |           |           |
| F5                                          | 1085.077186            | 83.950341                 | 0.053134  | 5.396569  |  |                                                            |                                 |                        |                                         |           |           |
| FC                                          | 1101.946642            | 96.117788                 | -0.736543 | 5.680127  |  |                                                            |                                 |                        |                                         |           |           |
| IF                                          | 59.452754              | 22.078649                 | 0.268883  | 3.395134  |  |                                                            |                                 |                        |                                         |           |           |
| MM                                          | 529.294165             | 25.944793                 | -1.048896 | 10.741275 |  |                                                            |                                 |                        |                                         |           |           |
| OL                                          | 932.771746             | 65.823626                 | -0.121097 | 11.530524 |  |                                                            |                                 |                        |                                         |           |           |
| RA                                          | 432.154900             | 77.693617                 | 1.815901  | 8.562734  |  |                                                            |                                 |                        |                                         |           |           |
| TI                                          | 464.402623             | 100.284867                | 4.893348  | 35.350585 |  |                                                            |                                 |                        |                                         |           |           |

**Table A8.** Summary of pooled fission track age analytical results for each AFT sub-group containing  $\geq 2$  grain ages. *Sub-groups for which  $P(\chi^2_{squared}) < 0.05$  are indicated in italics font.* U-Pb ages for apatite grains from M02, M07, M08, M11, M12, M28 are assumed  $150 \pm 150$  Ma (2sigma).

| Sub-Group           | Grains | Pooled AFT Age (Ma) | Pooled CI-95% (Ma) | Pooled CI+95% (Ma) | Pooled Ns (track) | Pooled Area (cm <sup>2</sup> cm) | Pooled Rho      | Pooled 1sigma          | Median Pb206*/U 238 Age (Ma) | Median -2sigma (Ma) | Median +2sigma (Ma) | Median [U] (ppm) | Median [Th] (ppm) | Median [Sm] (ppm) | Median Etch Figures | Median Dpar (um) | Median Dper (um) | Median Rmr0 |
|---------------------|--------|---------------------|--------------------|--------------------|-------------------|----------------------------------|-----------------|------------------------|------------------------------|---------------------|---------------------|------------------|-------------------|-------------------|---------------------|------------------|------------------|-------------|
| <b>M23</b>          | 40     | 7.65                | 1.46               | 1.8                | 92                | 1.54E-03                         | 1.00E-04        | 5.80E-07               | 115.1                        | -15.9               | 15.8                | 9.2              | 21.6              | 96.1              | 1                   | 2.04             | 0.4              | 0.8349      |
| <i>M23-001 060</i>  | 3      | 7.76                | 3.41               | 6.09               | 12                | 1.019E-04                        | 1.29E-05        | 2.20E-07               | 116.3                        | -15.6               | 15.6                | 18.2             | 53.6              | 75.9              | 2                   | 2.11             | 0.41             | 0.8436      |
| M23-002 048         | 5      | 21.89               | 12.95              | 31.64              | 5                 | 1.941E-04                        | 1.90E-06        | 4.92E-08               | 164.5                        | -23.7               | 23.6                | 2.0              | 6.6               | 176.1             | 1                   | 2.00             | 0.32             | 0.7205      |
| M23-004 035         | 6      | 5.79                | 2.72               | 5.12               | 10                | 2.320E-04                        | 1.44E-05        | 1.86E-07               | 104.2                        | -13.9               | 13.9                | 15.8             | 44.1              | 51.4              | 1                   | 1.99             | 0.48             | 0.8457      |
| M23-005 033         | 4      | 8.47                | 3.98               | 7.49               | 10                | 1.699E-04                        | 9.83E-06        | 1.64E-07               | 77.3                         | -10.5               | 10.5                | 10.4             | 23.2              | 228.0             | 1                   | 2.21             | 0.39             | 0.6974      |
| M23-010 015         | 3      | 15.71               | 9.94               | 27.00              | 4                 | 1.310E-04                        | 2.12E-06        | 6.12E-08               | 254.2                        | -38.6               | 38.4                | 3.4              | 10.3              | 127.3             | 1                   | 2.11             | 0.57             | 0.8457      |
| <b>M25</b>          | 32     | 11.13               | 2.42               | 3.09               | 68                | 1.25E-03                         | 5.09E-05        | 4.03E-07               | 116.3                        | -15.5               | 15.5                | 5.4              | 15.4              | 159.1             | 2                   | 2.32             | 0.5              | 0.7256      |
| M25-001 060         | 7      | 15.92               | 4.96               | 7.20               | 29                | 2.524E-04                        | 1.52E-05        | 1.88E-07               | 129.7                        | -15.8               | 15.7                | 6.6              | 15.6              | 121.7             | 2                   | 2.52             | 0.67             | 0.7476      |
| M25-002 048         | 8      | 10.42               | 4.89               | 9.21               | 10                | 3.150E-04                        | 7.99E-06        | 9.90E-08               | 101.0                        | -14.0               | 14.0                | 6.7              | 17.1              | 247.0             | 1                   | 2.42             | 0.47             | 0.6948      |
| M25-006 033         | 2      | 19.33               | 13.24              | 41.94              | 3                 | 9.707E-05                        | 1.29E-06        | 4.15E-08               | 219.8                        | -29.1               | 29.0                | 3.3              | 5.9               | 63.6              | 1                   | 2.35             | 0.41             | 0.6872      |
| M25-009 018         | 2      | 5.57                | 5.57               | 11.13              | 1                 | 8.251E-05                        | 1.49E-06        | 4.43E-08               | 62.1                         | -8.0                | 7.9                 | 4.5              | 11.8              | 200.8             | 1                   | 2.25             | 0.58             | 0.6868      |
| <b>M211</b>         | 18     | 16.8                | 3.57               | 4.53               | 72                | 3.77E-04                         | 3.56E-05        | 3.14E-07               | 98                           | -13                 | 13                  | 9.2              | 29.4              | 113.2             | 2                   | 2.33             | 0.41             | 0.8309      |
| M211-001 060        | 18     | 16.8                | 3.57               | 4.53               | 72                | 3.77E-04                         | 3.56E-05        | 3.14E-07               | 98                           | -13                 | 13                  | 9.2              | 29.4              | 113.2             | 2                   | 2.33             | 0.41             | 0.8309      |
| M211-004 035        | 3      | 9.34                | 5.22               | 11.81              | 6                 | 6.989E-05                        | 5.35E-06        | 1.16E-07               | 77.2                         | -12.6               | 12.5                | 11.8             | 34.4              | 84.3              | 2                   | 2.04             | 0.39             | 0.8341      |
| M211-033 004        | 2      | 10.99               | 5.16               | 9.72               | 10                | 5.339E-05                        | 7.57E-06        | 1.46E-07               | 91.4                         | -13.1               | 13.1                | 35.2             | 55.9              | 174.1             | 2                   | 1.95             | 0.43             | 0.8373      |
| M211-037 003        | 2      | 61.85               | 61.85              | 121.95             | 1                 | 1.941E-05                        | 1.34E-07        | 7.04E-09               | 516.0                        | -76.2               | 75.3                | 1.7              | 11.7              | 142.5             | 1                   | 2.54             | 0.43             | 0.5897      |
| <b>M220</b>         | 36     | 29.13               | 3.12               | 3.49               | 345               | 1.41E-03                         | 9.84E-05        | 5.62E-07               | 113.2                        | -13                 | 12.9                | 14.7             | 27.3              | 119.4             | 3                   | 2.17             | 0.42             | 0.8382      |
| M220-001 060        | 4      | 39.97               | 11.04              | 15.24              | 39                | 1.631E-04                        | 8.10E-06        | 1.52E-07               | 131.9                        | -16.4               | 16.4                | 6.5              | 18.1              | 144.3             | 4                   | 2.44             | 0.62             | 0.7644      |
| M220-002 048        | 4      | 28.38               | 8.86               | 12.86              | 29                | 1.602E-04                        | 8.49E-06        | 1.60E-07               | 113.2                        | -13.8               | 13.7                | 6.3              | 22.4              | 190.6             | 3                   | 2.21             | 0.52             | 0.7437      |
| M220-004 035        | 4      | 28.3                | 6.38               | 8.24               | 63                | 1.427E-04                        | 1.85E-05        | 2.84E-07               | 92.9                         | -10.5               | 10.5                | 29.6             | 57.2              | 73.9              | 4                   | 2.17             | 0.44             | 0.8391      |
| <i>M220-005 033</i> | 4      | 30.27               | 8.74               | 12.28              | 35                | 1.553E-04                        | 9.61E-06        | 1.66E-07               | 103.4                        | -11.4               | 11.3                | 12.7             | 38.3              | 289.2             | 3                   | 2.40             | 0.52             | 0.8131      |
| M220-010 015        | 2      | 65.00               | 30.57              | 57.44              | 10                | 9.707E-05                        | 1.28E-06        | 4.71E-08               | 206.2                        | -27.0               | 26.9                | 3.3              | 6.3               | 112.0             | 2                   | 2.31             | 0.44             | 0.8154      |
| M220-013 011        | 2      | 26.63               | 8.20               | 11.85              | 30                | 5.921E-05                        | 9.37E-06        | 1.89E-07               | 131.2                        | -13.7               | 13.6                | 34.3             | 66.7              | 46.6              | 4                   | 2.12             | 0.41             | 0.8445      |
| <b>M221</b>         | 14     | 13.43               | 2.74               | 3.44               | 79                | 2.65E-04                         | 4.90E-05        | 4.10E-07               | 48.2                         | -6                  | 6                   | 32.8             | 47.6              | 221.6             | 3                   | 2.04             | 0.37             | 0.8397      |
| M221 none           | -      | -                   | -                  | -                  | -                 | -                                | -               | -                      | -                            | -                   | -                   | -                | -                 | -                 | -                   | -                | -                | -           |
| Sub-Group           | Grains | Pooled AFT Age (Ma) | Pooled CI-95% (Ma) | Pooled CI+95% (Ma) | Pooled Ns (track) | Pooled Area (cm <sup>2</sup> cm) | Pooled [U]*Area | Pooled [U]*Area 1sigma | Median Pb206*/U 238 Age (Ma) | Median -2sigma (Ma) | Median +2sigma (Ma) | Median [U] (ppm) | Median [Th] (ppm) | Median [Sm] (ppm) | Median Etch Figures | Median Dpar (um) | Median Dper (um) | Median Rmr0 |
| <b>M02</b>          | 10     | 23.21               | 7.12               | 10.26              | 31                | 1.20E-04                         | 2.64E-03        | 1.79E-05               | 150                          | -150                | 150                 | 24.1             | 55.1              | 127.7             | 1                   | 2.5              | 0.1              | 0.7402      |
| 2004 01-006 033     | 2      | 137.36              | 86.64              | 230.48             | 4                 | 2.40E-05                         | 5.70E-05        | 7.37E-07               | 150                          | -150                | 150                 | 2.4              | 21.3              | 83                | 1                   | 2.46             | 0.1              | 0.7473      |
| <b>M07</b>          | 9      | 17.92               | 6.08               | 9.2                | 24                | 1.08E-04                         | 2.65E-03        | 1.71E-05               | 150                          | -150                | 150                 | 23.8             | 95.5              | 139.9             | 1                   | 2.61             | 0.1              | 0.7213      |
| 2004 02-001 060     | 2      | 53.76               | 27.31              | 55.27              | 8                 | 2.40E-05                         | 2.93E-04        | 3.74E-06               | 150                          | -150                | 150                 | 12.2             | 83.5              | 121               | 1                   | 2.4              | 0.1              | 0.7328      |
| <b>M08</b>          | 17     | 26.79               | 4.33               | 5.16               | 156               | 2.04E-04                         | 1.15E-02        | 6.13E-05               | 150                          | -150                | 150                 | 54.8             | 52.7              | 115               | 1                   | 2.88             | 0.1              | 0.6681      |
| 2004 03-004 035     | 2      | 99.87               | 36.26              | 56.68              | 20                | 2.40E-05                         | 3.93E-04        | 5.01E-06               | 150                          | -150                | 150                 | 16.4             | 45.6              | 49.9              | 1                   | 2.68             | 0.1              | 0.7073      |
| <b>M11</b>          | 23     | 30.97               | 6.25               | 7.82               | 88                | 2.76E-04                         | 5.61E-03        | 3.06E-05               | 150                          | -150                | 150                 | 16.9             | 26                | 191.8             | 1                   | 2.69             | 0.1              | 0.7065      |
| 2004 04-002 048     | 6      | 41.44               | 15.7               | 25.23              | 18                | 7.19E-05                         | 8.57E-04        | 7.96E-06               | 150                          | -150                | 150                 | 6.7              | 18.8              | 174               | 1                   | 2.81             | 0.1              | 0.6828      |
| 2004 04-047 003     | 3      | 14.39               | 6.17               | 10.79              | 13                | 3.60E-05                         | 1.79E-03        | 2.37E-05               | 150                          | -150                | 150                 | 26.4             | 105.7             | 428.8             | 1                   | 2.55             | 0.1              | 0.7319      |
| <b>M12</b>          | 25     | 31.95               | 5.61               | 6.8                | 125               | 3.00E-04                         | 7.73E-03        | 3.62E-05               | 150                          | -150                | 150                 | 19.7             | 30.1              | 89.7              | 1                   | 2.52             | 0.1              | 0.7371      |
| 2004 05-002 048     | 2      | 58.78               | 23.85              | 40.02              | 15                | 2.40E-05                         | 5.03E-04        | 7.33E-06               | 150                          | -150                | 150                 | 21               | 24.2              | 155.4             | 1                   | 2.71             | 0.1              | 0.6944      |
| 2004 05-006 033     | 3      | 50.58               | 14.63              | 20.56              | 36                | 3.60E-05                         | 1.40E-03        | 2.14E-05               | 150                          | -150                | 150                 | 13.9             | 13                | 70.5              | 1                   | 3.12             | 0.1              | 0.6123      |
| 2004 05-009 018     | 2      | 18.22               | 9.27               | 18.83              | 8                 | 2.40E-05                         | 8.68E-04        | 1.12E-05               | 150                          | -150                | 150                 | 36.2             | 91.7              | 192.9             | 1                   | 2.17             | 0.1              | 0.79        |
| 2004 05-013 011     | 3      | 49.96               | 20.8               | 35.53              | 14                | 3.60E-05                         | 5.53E-04        | 5.94E-06               | 150                          | -150                | 150                 | 16.4             | 45                | 53.8              | 1                   | 2.31             | 0.1              | 0.7705      |

|                 |    |       |       |       |     |          |          |          |     |      |     |      |       |       |   |      |     |        |
|-----------------|----|-------|-------|-------|-----|----------|----------|----------|-----|------|-----|------|-------|-------|---|------|-----|--------|
|                 |    |       |       |       |     |          |          |          |     |      |     |      |       |       |   |      |     |        |
| <b>M28</b>      | 32 | 21.61 | 4.02  | 4.94  | 108 | 3.84E-04 | 9.88E-03 | 3.98E-05 | 150 | -150 | 150 | 18.6 | 33.1  | 80.3  | 1 | 2.94 | 0.1 | 0.6549 |
| 2004 07-001 060 | 6  | 30.49 | 13.05 | 22.79 | 13  | 7.19E-05 | 8.42E-04 | 7.85E-06 | 150 | -150 | 150 | 8    | 21.8  | 128.8 | 1 | 2.67 | 0.1 | 0.7104 |
| 2004 07-004 035 | 5  | 13.93 | 5.97  | 10.43 | 13  | 5.99E-05 | 1.85E-03 | 1.58E-05 | 150 | -150 | 150 | 38   | 48    | 57.5  | 1 | 2.91 | 0.1 | 0.6616 |
| 2004 07-006 033 | 6  | 20.5  | 7.78  | 12.51 | 18  | 7.19E-05 | 1.74E-03 | 1.84E-05 | 150 | -150 | 150 | 12.6 | 22.5  | 80.3  | 1 | 3.09 | 0.1 | 0.6186 |
| 2004 07-019 008 | 2  | 8.46  | 5.01  | 12.28 | 5   | 2.40E-05 | 1.17E-03 | 1.55E-05 | 150 | -150 | 150 | 48.8 | 93.1  | 57    | 1 | 2.9  | 0.1 | 0.6635 |
| 2004 07-078 002 | 2  | 51.61 | 23.46 | 42.87 | 11  | 2.40E-05 | 4.20E-04 | 5.35E-06 | 150 | -150 | 150 | 17.5 | 125.1 | 634.9 | 1 | 3.78 | 0.1 | 0.3863 |

**Table A8. (continued).**

| Sub-Group    | Zeta     | 1 sigma  | Chi-Squared | P(Chi-Squared) |
|--------------|----------|----------|-------------|----------------|
| <b>M23</b>   | 8.33E-06 | 1.42E-07 | 48.5708     | 0.1401         |
| M23-001 060  | 8.33E-06 | 1.42E-07 | 12.82       | 0.0016         |
| M23-002 048  | 8.33E-06 | 1.42E-07 | 2.15        | 0.7081         |
| M23-004 035  | 8.33E-06 | 1.42E-07 | 3.68        | 0.5964         |
| M23-005 033  | 8.33E-06 | 1.42E-07 | 1.57        | 0.6659         |
| M23-010 015  | 8.33E-06 | 1.42E-07 | 0.85        | 0.6541         |
|              |          |          |             |                |
| <b>M25</b>   | 8.33E-06 | 1.42E-07 | 22.33       | 0.8723         |
| M25-001 060  | 8.33E-06 | 1.42E-07 | 0.97        | 0.9868         |
| M25-002 048  | 8.33E-06 | 1.42E-07 | 2.97        | 0.8879         |
| M25-006 033  | 8.33E-06 | 1.42E-07 | 0.53        | 0.4648         |
| M25-009 018  | 8.33E-06 | 1.42E-07 | 1.13        | 0.2884         |
|              |          |          |             |                |
| <b>M211</b>  | 8.33E-06 | 1.42E-07 | 16.68       | 0.4759         |
| M211-001 060 | 8.33E-06 | 1.42E-07 | 0.21        | 0.6446         |
| M211-004 035 | 8.33E-06 | 1.42E-07 | 0.86        | 0.6520         |
| M211-033 004 | 8.33E-06 | 1.42E-07 | 0.02        | 0.8803         |
| M211-037 003 | 8.33E-06 | 1.42E-07 | 0.54        | 0.4609         |
|              |          |          |             |                |
| <b>M220</b>  | 8.33E-06 | 1.42E-07 | 61.71       | 0.0035         |
| M220-001 060 | 8.33E-06 | 1.42E-07 | 0.39        | 0.9424         |
| M220-002 048 | 8.33E-06 | 1.42E-07 | 0.53        | 0.9126         |
| M220-004 035 | 8.33E-06 | 1.42E-07 | 6.41        | 0.0933         |
| M220-005 033 | 8.33E-06 | 1.42E-07 | 10.26       | 0.0165         |
| M220-010 015 | 8.33E-06 | 1.42E-07 | 0.77        | 0.3798         |
| M220-013 011 | 8.33E-06 | 1.42E-07 | 0.73        | 0.3916         |
|              |          |          |             |                |
| <b>M221</b>  | 8.33E-06 | 1.42E-07 | 7.32        | 0.8851         |
| M221 none    | -        | -        | -           | -              |
| Sub-Group    | Zeta     | 1 sigma  | Chi-Squared | P(Chi-Squared) |
| <b>M02</b>   | 1.98E-03 | 7.27E-05 | 27.69       | 0.0011         |
| M02-006 033  | 1.98E-03 | 7.27E-05 | 1.80        | 0.1792         |
|              |          |          |             |                |
| <b>M07</b>   | 1.98E-03 | 7.27E-05 | 21.53       | 0.0059         |
| M07-001 060  | 1.98E-03 | 7.27E-05 | 1.79        | 0.1810         |
|              |          |          |             |                |
| <b>M08</b>   | 1.98E-03 | 7.27E-05 | 69.57       | 0.0000         |
| M08-004 035  | 1.98E-03 | 7.27E-05 | 2.38        | 0.1232         |
|              |          |          |             |                |
| <b>M11</b>   | 1.98E-03 | 7.27E-05 | 59.77       | 0.0000         |
| M11-002 048  | 1.98E-03 | 7.27E-05 | 2.41        | 0.7894         |
| M11-047 003  | 1.98E-03 | 7.27E-05 | 2.03        | 0.3625         |
|              |          |          |             |                |
| <b>M12</b>   | 1.98E-03 | 7.27E-05 | 111.12      | 0.0000         |
| M12-002 048  | 1.98E-03 | 7.27E-05 | 2.68        | 0.1015         |

|             |          |          |        |        |
|-------------|----------|----------|--------|--------|
| M12-006 033 | 1.98E-03 | 7.27E-05 | 24.50  | 0.0000 |
| M12-009 018 | 1.98E-03 | 7.27E-05 | 2.84   | 0.0918 |
| M12-013 011 | 1.98E-03 | 7.27E-05 | 4.42   | 0.1094 |
|             |          |          |        |        |
| <b>M28</b>  | 1.98E-03 | 7.27E-05 | 164.50 | 0.0000 |
| M28-001 060 | 1.98E-03 | 7.27E-05 | 25.23  | 0.0001 |
| M28-004 035 | 1.98E-03 | 7.27E-05 | 4.81   | 0.3076 |
| M28-006 033 | 1.98E-03 | 7.27E-05 | 22.99  | 0.0003 |
| M28-019 008 | 1.98E-03 | 7.27E-05 | 1.24   | 0.2655 |
| M28-078 002 | 1.98E-03 | 7.27E-05 | 2.56   | 0.1096 |

**Table A9.** Summary of fission track length analytical results for each AFT sub-group. LA-ICP-MS was not done on M02, M07, M08, M11, M12, M28 AFT length grains.

| Sub-Group    | CFTs | Mean Length (um) | 1 sigma (um) | Std Dev (um) | Median Pb206*/U 238 Age (Ma) | Median -2sigma (Ma) | Median +2sigma (Ma) | Median [U] (ppm) | Median [Th] (ppm) | Median [Sm] (ppm) | Median Etch Figures | Median Dpar (um) | Median Dper (um) | Median Rmr0 |
|--------------|------|------------------|--------------|--------------|------------------------------|---------------------|---------------------|------------------|-------------------|-------------------|---------------------|------------------|------------------|-------------|
| M23          | 101  | 13.56            | 0.21         | 2.08         | 88.8                         | -8.93               | 8.92                | 48.41            | 50.31             | 141.48            | 4                   | 2.54             | 0.51             | 0.8036      |
| M23-001 060  | 13   | 12.93            | 0.46         | 1.59         | 95.9                         | -9.9                | 9.8                 | 48.4             | 85.2              | 104.4             | 4                   | 2.80             | 0.51             | 0.8418      |
| M23-002 048  | 1    | 13.41            | 0.00         | 0.00         | 175.1                        | -18.4               | 18.3                | 13.2             | 29.2              | 99.3              | 4                   | 2.43             | 0.79             | 0.8464      |
| M23-004 035  | 6    | 14.07            | 0.54         | 1.21         | 94.3                         | -10.0               | 10.0                | 28.7             | 36.3              | 37.2              | 4                   | 2.46             | 0.51             | 0.8498      |
| M23-005 033  | 16   | 13.37            | 0.78         | 3.02         | 86.2                         | -8.8                | 8.7                 | 62.8             | 39.5              | 235.9             | 4                   | 3.07             | 0.70             | 0.7598      |
| M23-010 015  | -    | -                | -            | -            | -                            | -                   | -                   | -                | -                 | -                 | -                   | -                | -                | -           |
| M25          | 89   | 13.54            | 0.21         | 2            | 118.05                       | -12.88              | 12.85               | 16.09            | 23.53             | 125.98            | 4                   | 2.56             | 0.71             | 0.7808      |
| M25-001 060  | 22   | 13.32            | 0.49         | 2.23         | 99.2                         | -9.0                | 9.0                 | 97.2             | 140.3             | 84.4              | 4                   | 2.86             | 0.77             | 0.7808      |
| M25-002 048  | 9    | 13.83            | 0.40         | 1.14         | 123.9                        | -13.3               | 13.3                | 7.7              | 18.8              | 145.2             | 4                   | 2.63             | 0.72             | 0.7490      |
| M25-006 033  | 6    | 12.62            | 1.26         | 2.81         | 97.9                         | -10.6               | 10.6                | 3.6              | 6.7               | 66.7              | 4                   | 2.81             | 0.83             | 0.6944      |
| M25-009 018  | -    | -                | -            | -            | -                            | -                   | -                   | -                | -                 | -                 | -                   | -                | -                | -           |
| M211         | 26   | 13.58            | 0.38         | 1.89         | 95.61                        | -9.36               | 9.34                | 99.76            | 70.86             | 110.18            | 4                   | 2.45             | 0.48             | 0.7869      |
| M211-001 060 | 8    | 12.38            | 0.72         | 1.91         | 95.6                         | -9.4                | 9.3                 | 109.1            | 183.6             | 110.2             | 4                   | 2.88             | 0.89             | 0.7840      |
| M211-004 035 | -    | -                | -            | -            | -                            | -                   | -                   | -                | -                 | -                 | -                   | -                | -                | -           |
| M211-033 004 | -    | -                | -            | -            | -                            | -                   | -                   | -                | -                 | -                 | -                   | -                | -                | -           |
| M211-037 003 | -    | -                | -            | -            | -                            | -                   | -                   | -                | -                 | -                 | -                   | -                | -                | -           |
| M220         | 206  | 13.37            | 0.12         | 1.77         | 98.71                        | -9.51               | 9.5                 | 28.21            | 43.58             | 99.82             | 4                   | 2.5              | 0.51             | 0.8259      |
| M220-001 060 | 45   | 12.93            | 0.30         | 1.99         | 90.9                         | -9.1                | 9.0                 | 35.4             | 49.5              | 99.8              | 4                   | 2.50             | 0.53             | 0.8261      |
| M220-002 048 | 12   | 12.71            | 0.31         | 1.03         | 140.6                        | -16.0               | 15.9                | 19.3             | 25.2              | 167.3             | 4                   | 2.17             | 0.57             | 0.8214      |
| M220-004 035 | 12   | 13.26            | 0.50         | 1.66         | 102.5                        | -10.2               | 10.2                | 31.6             | 59.9              | 42.8              | 4                   | 2.48             | 0.45             | 0.8405      |
| M220-005 033 | 28   | 13.90            | 0.30         | 1.58         | 83.4                         | -7.8                | 7.8                 | 28.2             | 61.6              | 301.0             | 4                   | 2.68             | 0.47             | 0.7830      |
| M220-010 015 | 1    | 13.01            | 0.00         | 0.00         | 152.6                        | -15.9               | 15.8                | 6.6              | 16.9              | 96.7              | 4                   | 2.05             | 0.57             | 0.8396      |
| M220-013 011 | 18   | 13.30            | 0.39         | 1.62         | 106.8                        | -9.5                | 9.4                 | 40.2             | 66.6              | 56.3              | 4                   | 2.73             | 0.59             | 0.8388      |
| M221         | 50   | 12.82            | 0.22         | 1.55         | 45.02                        | -4.98               | 4.97                | 113.13           | 138.21            | 191.03            | 4                   | 2.29             | 0.43             | 0.8376      |
| M221 none    | -    | -                | -            | -            | -                            | -                   | -                   | -                | -                 | -                 | -                   | -                | -                | -           |
| Sub-Group    | CFTs | Mean Length (um) | 1 sigma (um) | Std Dev (um) |                              |                     |                     |                  |                   |                   |                     | Median Dpar (um) |                  | Median Rmr0 |
| M02          | 78   | 12.8             | 0.33         | 2.85         | 150                          | -150                | 150                 |                  |                   |                   |                     | 2.58             |                  | 0.7266      |
| M07          | 27   | 11.56            | 0.44         | 2.26         | 150                          | -150                | 150                 |                  |                   |                   |                     | 2.45             |                  | 0.7487      |
| M08          | 63   | 13.59            | 0.27         | 2.12         | 150                          | -150                | 150                 |                  |                   |                   |                     | 2.75             |                  | 0.6949      |
| M11          | 110  | 12.25            | 0.19         | 1.97         | 150                          | -150                | 150                 |                  |                   |                   |                     | 2.91             |                  | 0.6616      |
| M12          | 118  | 13.1             | 0.12         | 1.32         | 150                          | -150                | 150                 |                  |                   |                   |                     | 2.58             |                  | 0.7258      |
| M28          | 79   | 13.07            | 0.32         | 2.87         | 150                          | -150                | 150                 |                  |                   |                   |                     | 3.05             |                  | 0.6295      |

**Table A10.** Assumed C1 Chondrite and Durango REE ppm values. Durango (DR+DRG) REE ppm values and McClure Mountain (MM) REE ppm values measured in this study are compared to values reported by Chew et al. (2016).

| Oxide                          | Atomic Number | Assumed<br>C1 Chondrite             | Assumed<br>Dur-DonG           | Measured<br>DR+DRG | Measured<br>McClure<br>Mountain | Measured<br>MM    |
|--------------------------------|---------------|-------------------------------------|-------------------------------|--------------------|---------------------------------|-------------------|
|                                | amu           | McDonough and<br>Sun, (2016)<br>ppm | Chew et al.,<br>(2016)<br>ppm | This Study<br>ppm  | Chew et al.,<br>(2016)<br>ppm   | This Study<br>ppm |
| La <sub>2</sub> O <sub>3</sub> | 57            | 0.2370                              | 3786.000                      | 3786.277           | 1764.000                        | 1534.878          |
| Ce <sub>2</sub> O <sub>3</sub> | 58            | 0.6130                              | 5306.000                      | 5302.979           | 2859.000                        | 2566.089          |
| Pr <sub>2</sub> O <sub>3</sub> | 59            | 0.0928                              | 472.500                       | 472.150            | 275.200                         | 240.468           |
| Nd <sub>2</sub> O <sub>3</sub> | 60            | 0.4570                              | 1534.000                      | 1537.293           | 894.400                         | 762.611           |
| Sm <sub>2</sub> O <sub>3</sub> | 62            | 0.1480                              | 215.200                       | 215.297            | 106.700                         | 91.881            |
| Eu <sub>2</sub> O <sub>3</sub> | 63            | 0.0563                              | 18.900                        | 18.883             | 41.190                          | 34.038            |
| Gd <sub>2</sub> O <sub>3</sub> | 64            | 0.1990                              | 18.900                        | 18.883             | 41.190                          | 34.038            |
| Tb <sub>2</sub> O <sub>3</sub> | 65            | 0.0361                              | 186.900                       | 187.129            | 74.320                          | 62.967            |
| Dy <sub>2</sub> O <sub>3</sub> | 66            | 0.2460                              | 24.250                        | 24.224             | 8.593                           | 6.928             |
| Ho <sub>2</sub> O <sub>3</sub> | 67            | 0.0546                              | 129.900                       | 130.184            | 41.620                          | 34.407            |
| Er <sub>2</sub> O <sub>3</sub> | 68            | 0.1600                              | 26.350                        | 26.391             | 7.950                           | 6.434             |
| Tm <sub>2</sub> O <sub>3</sub> | 69            | 0.0247                              | 68.690                        | 68.761             | 20.300                          | 16.338            |
| Yb <sub>2</sub> O <sub>3</sub> | 70            | 0.1610                              | 8.745                         | 8.730              | 2.717                           | 2.120             |
| Lu <sub>2</sub> O <sub>3</sub> | 71            | 0.0246                              | 45.100                        | 45.017             | 15.840                          | 12.072            |

**Table A11.** Calibration by linear regression of the standard group data from Table A10.

| Calibrated Parameter                                | m         | b         | b <sub>u</sub> | Y <sub>min</sub> | Y <sub>umin</sub> |
|-----------------------------------------------------|-----------|-----------|----------------|------------------|-------------------|
| log(C1 Normalized La ppm)                           | -0.008992 | 0.090003  | 0.124791       | 0.013145         | 0.047933          |
| log(C1 Normalized Ce ppm)                           | -0.003972 | 0.071502  | 0.107813       | 0.012027         | 0.048338          |
| log(C1 Normalized Pr ppm)                           | -0.011506 | 0.097654  | 0.136523       | 0.014439         | 0.053308          |
| log(C1 Normalized Nd ppm)                           | -0.011779 | 0.099396  | 0.144917       | 0.017991         | 0.063512          |
| log(C1 Normalized Sm ppm)                           | -0.037076 | 0.183698  | 0.234093       | 0.024880         | 0.075275          |
| log(C1 Normalized Eu ppm)                           | -0.049017 | 0.203687  | 0.243395       | 0.028479         | 0.068187          |
| log(C1 Normalized Gd ppm)                           | -0.033897 | 0.168897  | 0.217040       | 0.022526         | 0.070669          |
| log(C1 Normalized Tb ppm)                           | -0.064841 | 0.258636  | 0.304010       | 0.024504         | 0.069878          |
| log(C1 Normalized Dy ppm)                           | -0.033545 | 0.159970  | 0.211234       | 0.025401         | 0.076665          |
| log(C1 Normalized Ho ppm)                           | -0.041690 | 0.180882  | 0.230066       | 0.021882         | 0.071066          |
| log(C1 Normalized Er ppm)                           | -0.038271 | 0.167683  | 0.217523       | 0.024739         | 0.074580          |
| log(C1 Normalized Tm ppm)                           | -0.090468 | 0.316556  | 0.346992       | 0.034548         | 0.064984          |
| log(C1 Normalized Yb ppm)                           | -0.072630 | 0.259829  | 0.288347       | 0.030382         | 0.058901          |
| log(C1 Normalized Lu ppm)                           | -0.070062 | 0.259509  | 0.284043       | 0.045922         | 0.070455          |
| log(C1 Normalized Ce ppm)-log(C1 Normalized La ppm) | -0.009322 | 0.061189  | 0.076937       | 0.012690         | 0.028439          |
| log(C1 Normalized Pr ppm)-log(C1 Normalized Ce ppm) | -0.009764 | 0.058806  | 0.069725       | 0.012220         | 0.023138          |
| log(C1 Normalized Nd ppm)-log(C1 Normalized Pr ppm) | -0.016628 | 0.081569  | 0.098834       | 0.011380         | 0.028645          |
| log(C1 Normalized Sm ppm)-log(C1 Normalized Nd ppm) | -0.049170 | 0.201789  | 0.222694       | 0.017714         | 0.038618          |
| log(C1 Normalized Eu ppm)-log(C1 Normalized Sm ppm) | -0.054854 | 0.259627  | 0.344552       | 0.031522         | 0.116447          |
| log(C1 Normalized Gd ppm)-log(C1 Normalized Eu ppm) | -0.076924 | 0.277528  | 0.324298       | 0.032333         | 0.079103          |
| log(C1 Normalized Tb ppm)-log(C1 Normalized Gd ppm) | -0.093990 | 0.326874  | 0.390690       | 0.021804         | 0.085620          |
| log(C1 Normalized Dy ppm)-log(C1 Normalized Tb ppm) | -0.085043 | 0.287468  | 0.342933       | 0.019510         | 0.074974          |
| log(C1 Normalized Ho ppm)-log(C1 Normalized Dy ppm) | -0.059390 | 0.205850  | 0.224652       | 0.021882         | 0.040685          |
| log(C1 Normalized Er ppm)-log(C1 Normalized Ho ppm) | -0.064084 | 0.216993  | 0.240756       | 0.019282         | 0.043046          |
| log(C1 Normalized Tm ppm)-log(C1 Normalized Er ppm) | -0.100483 | 0.326445  | 0.382353       | 0.030245         | 0.086153          |
| log(C1 Normalized Yb ppm)-log(C1 Normalized Tm ppm) | -0.115005 | 0.359576  | 0.400565       | 0.027672         | 0.068661          |
| log(C1 Normalized Lu ppm)-log(C1 Normalized Yb ppm) | -0.108690 | 0.338872  | 0.394365       | 0.030894         | 0.086386          |
| log(C1 Normalized La ppm)-log(C1 Normalized Lu ppm) | -0.069052 | 0.243733  | 0.274395       | 0.040555         | 0.071216          |
| <sup>206</sup> Pb/ <sup>238</sup> U Age             | 0.089342  | 14.768642 | 81.642617      | 7.604816         | 74.478791         |
| Eu anomaly (only <0 or >=0)                         | -         | -         | -              | -                | -                 |

Notes:

$$\text{Eu anomaly} = \log(\text{C1 Normalized Eu ppm}) - [\log(\text{C1 Normalized Sm ppm}) + \log(\text{C1 Normalized Gd ppm})]/2$$

**Table A12.** Thermal history implications of the AFT data.

| Samp<br>le | Oldest<br>Ma<br>AFT<br>median(2σ) | Peak Ma<br>median(2σ) | Peak °C<br>median(2σ) | EasyRo<br>median(2σ) | BasinRo<br>median(2σ) | EasyDL<br>median(2σ) | °C at 1 Ma<br>median(2σ) | °C at 5 Ma<br>median(2σ) | °C at 10 Ma<br>median(2σ) | °C at 15 Ma<br>median(2σ) | °C at 20 Ma<br>median(2σ) | °C at 30 Ma<br>median(2σ) | °C at 50 Ma<br>median(2σ) |
|------------|-----------------------------------|-----------------------|-----------------------|----------------------|-----------------------|----------------------|--------------------------|--------------------------|---------------------------|---------------------------|---------------------------|---------------------------|---------------------------|
| M23        | 15.00(10.27)                      | 14.50(9.95)           | ≥167.79(26.33)        | ≥1.32(0.36)          | ≥1.04(0.33)           | ≥1.33(0.45)          | 22.49(16.98)             | 66.44(34.09)             | 120.13(75.20)             | ≥165.68(44.47)            |                           |                           |                           |
| M25        | 18.00(11.53)                      | 18.00(11.47)          | ≥176.82(20.63)        | ≥1.46(0.30)          | ≥1.23(0.32)           | ≥1.56(0.45)          | 22.49(18.32)             | 57.09(29.39)             | 86.39(62.04)              | ≥147.56(74.69)            |                           |                           |                           |
| M211       | 22.00(16.82)                      | 22.00(13.97)          | ≥131.19(19.76)        | ≥0.79(0.13)          | ≥0.65(0.08)           | ≥0.65(0.11)          | 18.16(10.65)             | 31.70(28.08)             | 56.02(47.57)              | 87.59(71.55)              | ≥115.28(70.52)            |                           |                           |
| M220       | 34.00(8.43)                       | 34.00(7.54)           | ≥164.88(20.19)        | ≥1.25(0.30)          | ≥0.92(0.25)           | ≥1.26(0.41)          | 19.49(11.54)             | 40.72(21.75)             | 59.23(10.89)              | 64.25(6.90)               | 68.77(9.09)               | ≥132.27(70.02)            |                           |
| M221       | 14.00(5.43)                       | 13.50(5.24)           | ≥125.28(23.08)        | ≥0.73(0.15)          | ≥0.62(0.09)           | ≥0.59(0.11)          | 28.14(23.24)             | 66.40(18.39)             | 85.28(37.67)              | ≥134.11(57.14)            |                           |                           |                           |
| M02        | 23.00(13.85)                      | 23.00(13.95)          | ≥163.42(12.08)        | ≥1.22(0.18)          | ≥0.89(0.16)           | ≥1.20(0.28)          | 19.02(12.94)             | 39.50(34.54)             | 77.25(59.14)              | 115.95(70.37)             | ≥146.61(56.98)            |                           |                           |
| M07        | 15.00(12.66)                      | 14.00(10.67)          | ≥170.76(28.24)        | ≥1.38(0.38)          | ≥1.12(0.36)           | ≥1.38(0.49)          | 27.10(34.07)             | 103.76(57.30)            | 131.44(59.66)             | ≥156.71(59.80)            |                           |                           |                           |
| M08        | 8.00(3.67)                        | 3.00(1.87)            | 71.03(23.55)          | 0.40(0.10)           | 0.41(0.09)            | 0.37(0.09)           | 38.19(36.33)             | 48.02(36.69)             | 20.57(15.68)              | 35.26(29.95)              | 51.19(48.34)              | 90.49(60.06)              | ≥167.18(28.02)            |
| M11        | 41.00(2.52)                       | 23.00(16.87)          | ≥108.75(15.42)        | ≥0.66(0.12)          | ≥0.57(0.09)           | ≥0.54(0.14)          | 18.93(17.02)             | 35.47(44.33)             | 62.96(48.47)              | 89.11(40.25)              | ≥94.86(31.48)             |                           |                           |
| M12        | 20.00(4.32)                       | 9.00(8.19)            | 73.23(19.01)          | 0.42(0.08)           | 0.43(0.07)            | 0.39(0.07)           | 19.98(28.52)             | 54.76(37.54)             | 59.87(32.49)              | 39.38(39.20)              | 18.16(12.81)              | 25.04(26.46)              | 54.03(60.60)              |
| M28        | 19.50(14.24)                      | 19.00(14.14)          | ≥177.03(14.90)        | ≥1.45(0.24)          | ≥1.23(0.29)           | ≥1.56(0.40)          | 23.23(22.86)             | 61.20(54.99)             | 100.93(85.41)             | 134.83(72.82)             | ≥162.23(62.07)            |                           |                           |

Notes:

EasyRo from Burnham and Sweeney (1989). BasinRo from Nielsen et al. (2017). EasyDL from Schenk et al. (2017).

**Table A13.** Time-temperature constraints used for AFT modeling.

| Sample | Provenance Start             | Deposition               | Peak Burial              | Present-Day            | tT Segment Points |
|--------|------------------------------|--------------------------|--------------------------|------------------------|-------------------|
| M23    | 100.0-100.0 Ma 200.0-199.0°C | 48.4-44.4 Ma 20.0-10.0°C | 43.4-1.0 Ma 200.0-10.0°C | 0.0-0.0 Ma 20.0-10.0°C | 9, 5, 33          |
| M25    | 100.0-100.0 Ma 200.0-199.0°C | 56.4-42.8 Ma 20.0-10.0°C | 41.8-1.0 Ma 200.0-10.0°C | 0.0-0.0 Ma 20.0-10.0°C | 9, 5, 33          |
| M211   | 100.0-100.0 Ma 200.0-199.0°C | 46.0-40.8 Ma 20.0-10.0°C | 39.8-1.0 Ma 200.0-10.0°C | 0.0-0.0 Ma 20.0-10.0°C | 9, 5, 33          |
| M220   | 100.0-100.0 Ma 200.0-199.0°C | 46.5-43.3 Ma 20.0-10.0°C | 42.3-1.0 Ma 200.0-10.0°C | 0.0-0.0 Ma 20.0-10.0°C | 9, 5, 33          |
| M221   | 100.0-100.0 Ma 200.0-199.0°C | 24.6-22.2 Ma 20.0-10.0°C | 21.2-1.0 Ma 200.0-10.0°C | 0.0-0.0 Ma 20.0-10.0°C | 9, 5, 33          |
| M02    | 150.0-150.0 Ma 200.0-199.0°C | 46.6-42.1 Ma 20.0-10.0°C | 41.1-1.0 Ma 200.0-10.0°C | 0.0-0.0 Ma 20.0-10.0°C | 9, 5, 33          |
| M07    | 150.0-150.0 Ma 200.0-199.0°C | 32.6-29.0 Ma 20.0-10.0°C | 28.0-1.0 Ma 200.0-10.0°C | 0.0-0.0 Ma 20.0-10.0°C | 9, 5, 33          |
| M08    | 150.0-150.0 Ma 200.0-199.0°C | 11.6-5.3 Ma 20.0-10.0°C  | 4.3-1.0 Ma 200.0-10.0°C  | 0.0-0.0 Ma 20.0-10.0°C | 9, 5, 33          |
| M11    | 150.0-150.0 Ma 200.0-199.0°C | 43.2-39.2 Ma 20.0-10.0°C | 38.2-1.0 Ma 200.0-10.0°C | 0.0-0.0 Ma 20.0-10.0°C | 9, 5, 33          |
| M12    | 150.0-150.0 Ma 200.0-199.0°C | 23.0-16.0 Ma 20.0-10.0°C | 15.0-1.0 Ma 200.0-10.0°C | 0.0-0.0 Ma 20.0-10.0°C | 9, 5, 33          |
| M28    | 150.0-150.0 Ma 200.0-199.0°C | 46.0-40.0 Ma 20.0-10.0°C | 39.0-1.0 Ma 200.0-10.0°C | 0.0-0.0 Ma 20.0-10.0°C | 9, 5, 33          |

### Part III: $FT^3$ Model Results

AFT age and length data were modeled using parameter  $rmr0$  from Ketcham et al. (1999). For samples M23, M25, M211, M220, M221,  $rmr0$  was calculated using the full suite of chemical composition analyses obtained by LA-ICP-MS. For samples M02, M07, M08, M11, M12, M28  $rmr0$  was calculated from parameter  $Dpar$ . Data not modeled are shown in black symbols. Some individual points were deleted to force  $P(\chi^2) \geq 0.05$ . Plots here are color coded using this color ramp based on median U-Pb age.

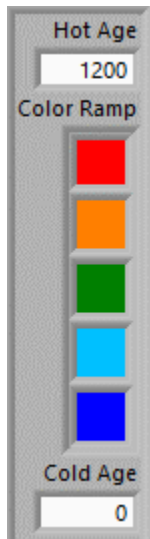

## M23

SFT Age Data: P1325\_001\_Sub Group\_000\_0\_

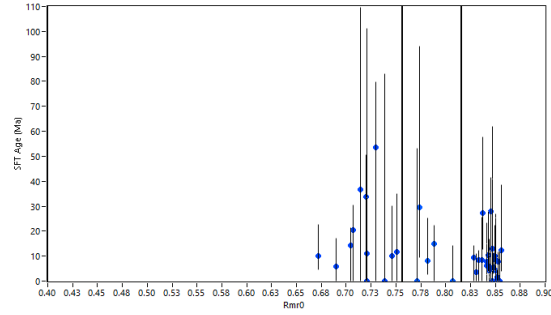

CFT Data: P1325\_001\_Sub Group\_000\_0\_

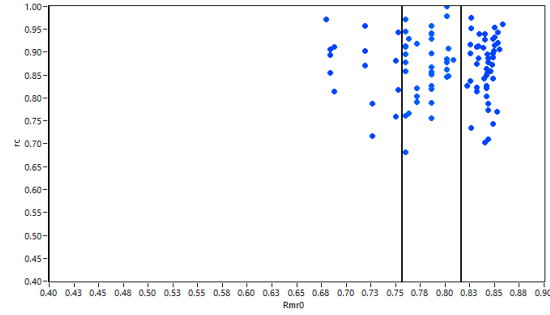

Model tT Population: P1325\_001\_

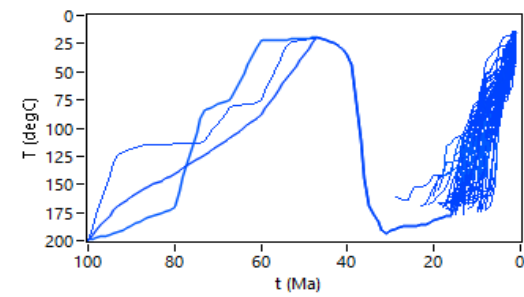

| Sample    |       | Best Fit Model  |         |         |                 |             |             |             |              |             |              |        |        | Measured     |              |              |        |        |       |      |              |        |
|-----------|-------|-----------------|---------|---------|-----------------|-------------|-------------|-------------|--------------|-------------|--------------|--------|--------|--------------|--------------|--------------|--------|--------|-------|------|--------------|--------|
| Sub-Group | Pop.  | Oldest AFT (Ma) | SFT GOF | CFT GOF | Strat. Age (Ma) | Peak t (Ma) | Peak T (°C) | Easy-Ro (%) | Basin-Ro (%) | Easy-DL (%) | AFT Age (Ma) | lc/lc0 | Isig   | AFT Age (Ma) | CI -95% (Ma) | CI +95% (Ma) | lc/lc0 | Isig   | Spots | CFTs | UPb Age (Ma) | Rmr0   |
| MM23-000  | Pop-1 | 10              | 0.6773  | 0.9578  | 10              | 10          | 108         | 0.62        | 0.55         | 0.51        | 7.2          | 0.8470 | 0.0796 | 6.5          | 1.4          | 1.8          | 0.8710 | 0.0711 | 23    | 49   | 104          | 0.8437 |
| MM23-000  | Pop-2 | 13              | 0.9925  | 0.9931  | 13              | 13          | 148         | 0.90        | 0.69         | 0.78        | 8.8          | 0.8350 | 0.1117 | 8.8          | 4.5          | 9.0          | 0.8712 | 0.0709 | 5     | 36   | 138          | 0.7843 |
| MM23-000  | Pop-3 | 19              | 0.5751  | 0.9324  | 19              | 18          | 168         | 1.36        | 1.09         | 1.37        | 9.8          | 0.7871 | 0.1549 | 12.4         | 4.6          | 7.2          | 0.8788 | 0.0878 | 12    | 16   | 103          | 0.7197 |

## M25

SFT Age Data: P1325\_002\_Sub Group\_000\_0\_

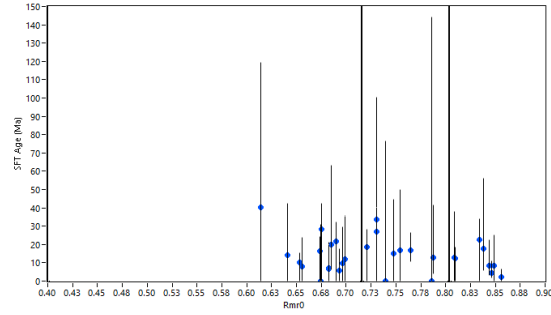

CFT Data: P1325\_002\_Sub Group\_000\_0\_

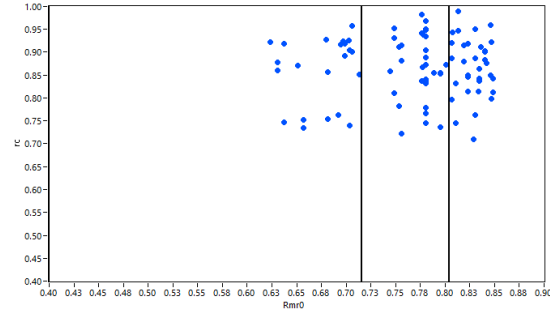

Model tT Population: P1325\_002\_

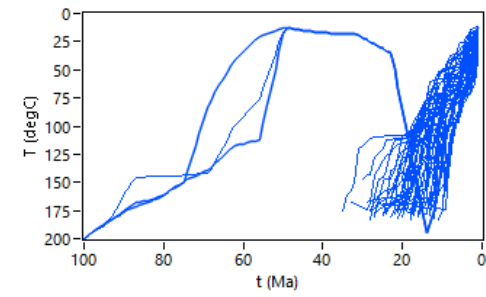

| Sample    |       | Best Fit Model  |         |         |                 |             |             |             |              |             |              |        |        | Measured     |              |              |        |        |       |      |              |        |  |
|-----------|-------|-----------------|---------|---------|-----------------|-------------|-------------|-------------|--------------|-------------|--------------|--------|--------|--------------|--------------|--------------|--------|--------|-------|------|--------------|--------|--|
| Sub-Group | Pop.  | Oldest AFT (Ma) | SFT GOF | CFT GOF | Strat. Age (Ma) | Peak t (Ma) | Peak T (°C) | Easy-Ro (%) | Basin-Ro (%) | Easy-DL (%) | AFT Age (Ma) | lc/lc0 | 1sig   | AFT Age (Ma) | CI -95% (Ma) | CI +95% (Ma) | lc/lc0 | 1sig   | Spots | CFTs | UPb Age (Ma) | Rmr0   |  |
| MM25-000  | Pop-1 | 13              | 0.4409  | 0.8547  | 13              | 13          | 99          | 0.56        | 0.52         | 0.48        | 9.9          | 0.8572 | 0.0729 | 6.8          | 2.5          | 4.0          | 0.8686 | 0.0639 | 8     | 34   | 120          | 0.8359 |  |
| MM25-000  | Pop-2 | 14              | 0.3266  | 0.7937  | 14              | 14          | 132         | 0.75        | 0.63         | 0.62        | 11.0         | 0.8732 | 0.0674 | 15.8         | 4.9          | 7.1          | 0.8678 | 0.0708 | 9     | 32   | 122          | 0.7642 |  |
| MM25-000  | Pop-3 | 16              | 0.9854  | 0.7561  | 16              | 16          | 180         | 1.45        | 1.23         | 1.60        | 11.5         | 0.8577 | 0.1083 | 11.4         | 4.1          | 6.4          | 0.8683 | 0.0837 | 15    | 23   | 129          | 0.7000 |  |

M211

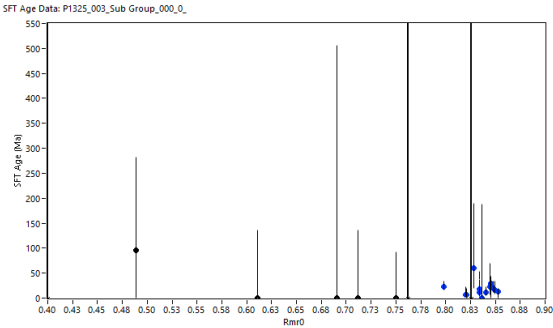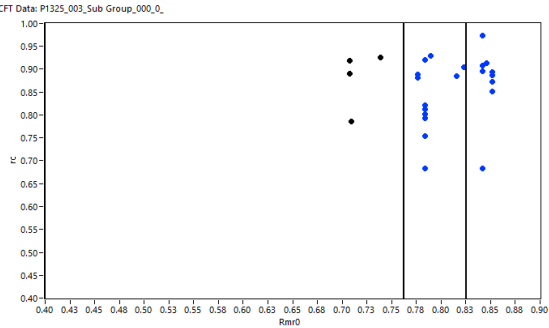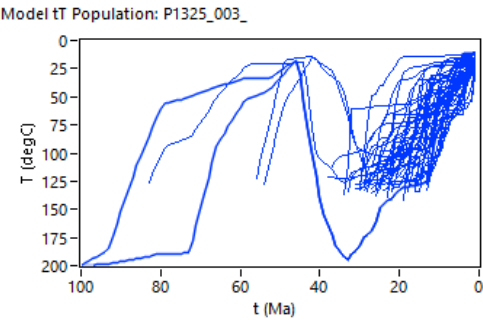

| Sample    |       | Best Fit Model  |         |         |                 |             |             |             |              |             |              |        |        | Measured     |              |              |        |        |       |      |              |        |  |
|-----------|-------|-----------------|---------|---------|-----------------|-------------|-------------|-------------|--------------|-------------|--------------|--------|--------|--------------|--------------|--------------|--------|--------|-------|------|--------------|--------|--|
| Sub-Group | Pop.  | Oldest AFT (Ma) | SFT GOF | CFT GOF | Strat. Age (Ma) | Peak t (Ma) | Peak T (°C) | Easy-Ro (%) | Basin-Ro (%) | Easy-DL (%) | AFT Age (Ma) | Ic/Ic0 | 1sig   | AFT Age (Ma) | CI -95% (Ma) | CI +95% (Ma) | Ic/Ic0 | 1sig   | Spots | CFTs | UPb Age (Ma) | Rmr0   |  |
| MM211-000 | Pop-1 | 22              | 0.9889  | 0.9365  | 22              | 22          | 110         | 0.64        | 0.56         | 0.52        | 15.8         | 0.8580 | 0.0982 | 15.9         | 4.2          | 5.8          | 0.8752 | 0.0791 | 10    | 9    | 86           | 0.8441 |  |
| MM211-000 | Pop-2 | 26              | 0.8215  | 0.9759  | 26              | 26          | 140         | 0.85        | 0.68         | 0.69        | 18.5         | 0.8541 | 0.1019 | 16.8         | 5.2          | 7.6          | 0.8567 | 0.0942 | 3     | 13   | 89           | 0.8022 |  |

## M220

SFT Age Data: P1325\_004\_Sub Group\_000\_0\_

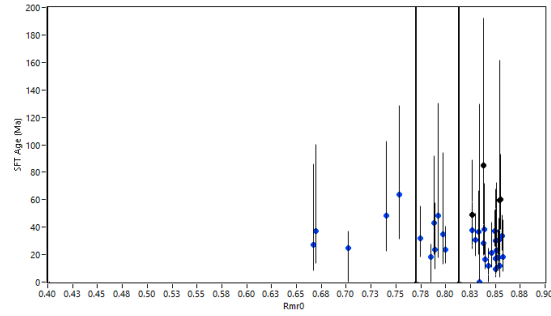

CFT Data: P1325\_004\_Sub Group\_000\_0\_

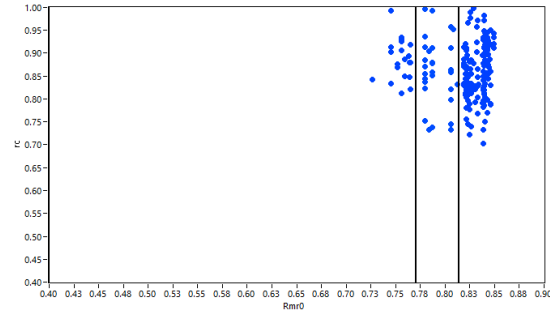

Model tT Population: P1325\_004\_

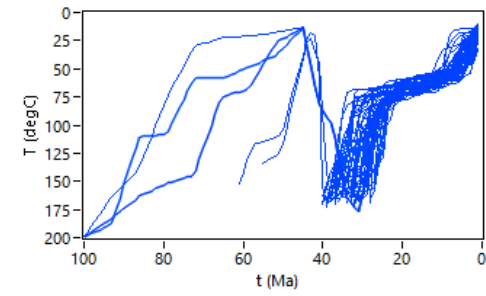

| Sample    |       | Best Fit Model  |         |         |                 |             |             |             |              |             |              |        |        | Measured     |              |              |        |        |       |      |              |        |  |
|-----------|-------|-----------------|---------|---------|-----------------|-------------|-------------|-------------|--------------|-------------|--------------|--------|--------|--------------|--------------|--------------|--------|--------|-------|------|--------------|--------|--|
| Sub-Group | Pop.  | Oldest AFT (Ma) | SFT GOF | CFT GOF | Strat. Age (Ma) | Peak t (Ma) | Peak T (°C) | Easy-Ro (%) | Basin-Ro (%) | Easy-DL (%) | AFT Age (Ma) | lc/lc0 | Isig   | AFT Age (Ma) | CI -95% (Ma) | CI +95% (Ma) | lc/lc0 | Isig   | Spots | CFTs | UPb Age (Ma) | Rmr0   |  |
| MM220-000 | Pop-1 | 34              | 0.9266  | 0.6693  | 34              | 34          | 107         | 0.62        | 0.55         | 0.51        | 25.2         | 0.8486 | 0.0702 | 24.9         | 3.1          | 3.5          | 0.8586 | 0.0581 | 20    | 152  | 98           | 0.8427 |  |
| MM220-000 | Pop-2 | 36              | 0.9542  | 0.9354  | 36              | 36          | 140         | 0.85        | 0.68         | 0.69        | 27.7         | 0.8650 | 0.0708 | 28.1         | 7.1          | 9.4          | 0.8601 | 0.0712 | 7     | 31   | 117          | 0.7880 |  |
| MM220-000 | Pop-3 | 37              | 0.3999  | 0.9996  | 37              | 37          | 151         | 0.96        | 0.70         | 0.87        | 29.0         | 0.8741 | 0.0663 | 40.4         | 13.5         | 20.4         | 0.9026 | 0.0658 | 5     | 23   | 102          | 0.7291 |  |

M221

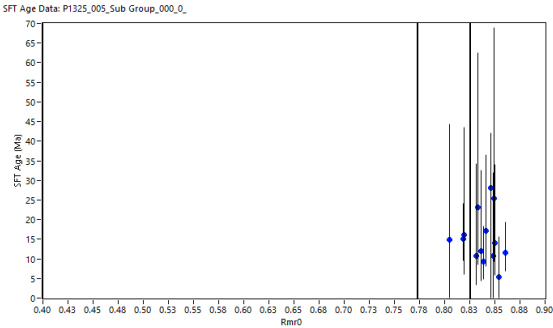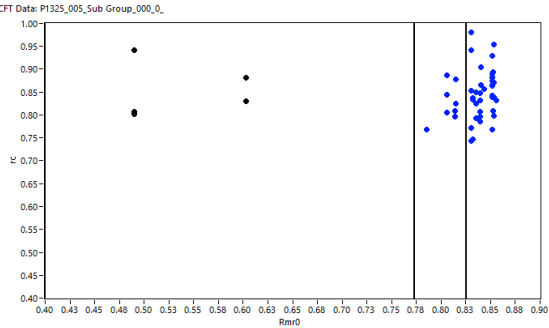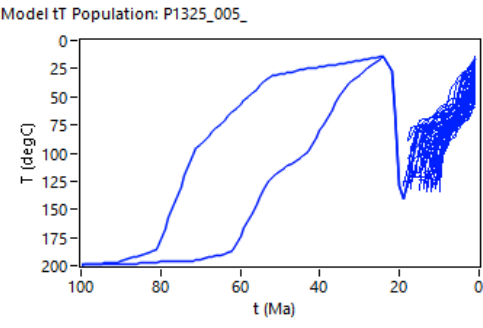

| Sample    |       | Best Fit Model  |         |         |                 |             |             |             |              |             |              |        |        | Measured     |              |              |        |        |       |      |              |        |  |
|-----------|-------|-----------------|---------|---------|-----------------|-------------|-------------|-------------|--------------|-------------|--------------|--------|--------|--------------|--------------|--------------|--------|--------|-------|------|--------------|--------|--|
| Sub-Group | Pop.  | Oldest AFT (Ma) | SFT GOF | CFT GOF | Strat. Age (Ma) | Peak t (Ma) | Peak T (°C) | Easy-Ro (%) | Basin-Ro (%) | Easy-DL (%) | AFT Age (Ma) | lc/lc0 | 1sig   | AFT Age (Ma) | CI -95% (Ma) | CI +95% (Ma) | lc/lc0 | 1sig   | Spots | CFTs | UPb Age (Ma) | Rmr0   |  |
| MM221-000 | Pop-1 | 18              | 0.8967  | 0.5747  | 18              | 18          | 104         | 0.60        | 0.54         | 0.51        | 12.7         | 0.8238 | 0.0578 | 12.2         | 2.9          | 3.8          | 0.8470 | 0.0542 | 11    | 37   | 54           | 0.8430 |  |
| MM221-000 | Pop-2 | 18              | 0.8304  | 0.8718  | 18              | 18          | 104         | 0.60        | 0.54         | 0.51        | 13.7         | 0.8456 | 0.0464 | 14.7         | 4.9          | 7.4          | 0.8264 | 0.0410 | 3     | 8    | 35           | 0.8144 |  |

M02

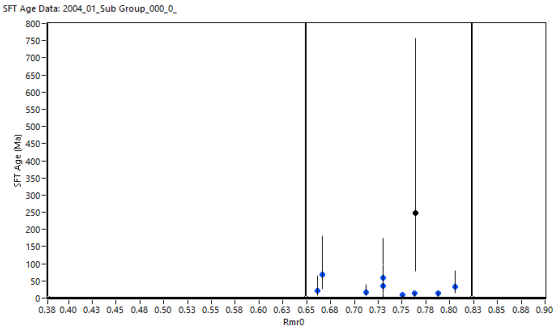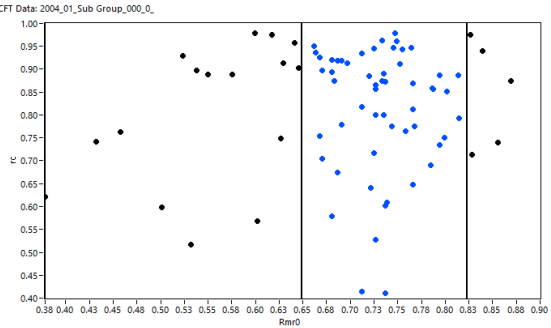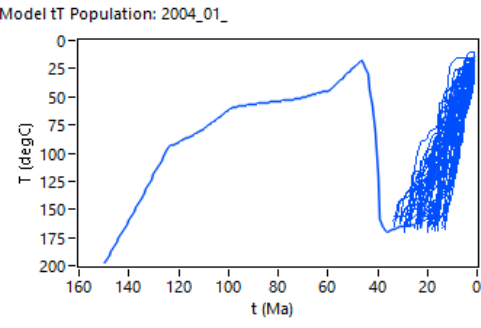

| Sample    |       | Best Fit Model  |         |         |                 |             |             |             |              |             |              |        |        | Measured     |              |              |        |        |       |      |              |        |  |
|-----------|-------|-----------------|---------|---------|-----------------|-------------|-------------|-------------|--------------|-------------|--------------|--------|--------|--------------|--------------|--------------|--------|--------|-------|------|--------------|--------|--|
| Sub-Group | Pop.  | Oldest AFT (Ma) | SFT GOF | CFT GOF | Strat. Age (Ma) | Peak t (Ma) | Peak T (°C) | Easy-Ro (%) | Basin-Ro (%) | Easy-DL (%) | AFT Age (Ma) | lc/lc0 | Isig   | AFT Age (Ma) | CI -95% (Ma) | CI +95% (Ma) | lc/lc0 | Isig   | Spots | CFTs | UPb Age (Ma) | Rmr0   |  |
| MM02-000  | Pop-2 | 34              | 0.8550  | 0.9242  | 34              | 34          | 165         | 1.22        | 0.89         | 1.23        | 23.0         | 0.8368 | 0.1094 | 21.2         | 6.8          | 9.9          | 0.8215 | 0.1408 | 9     | 57   | 125          | 0.7328 |  |

# M07

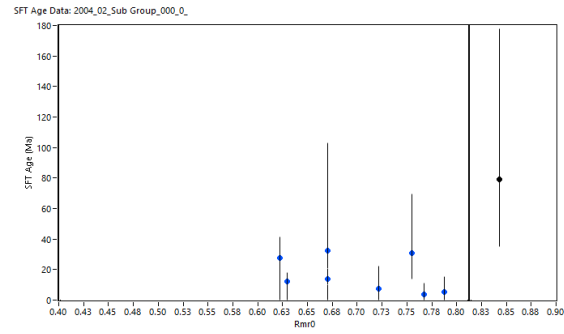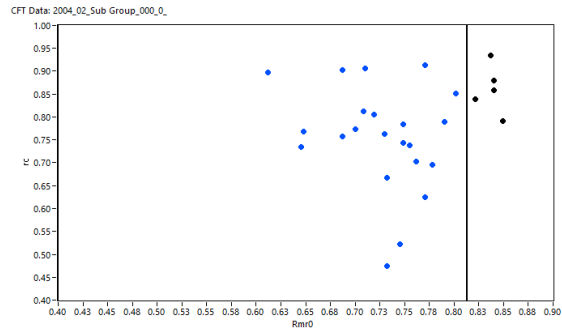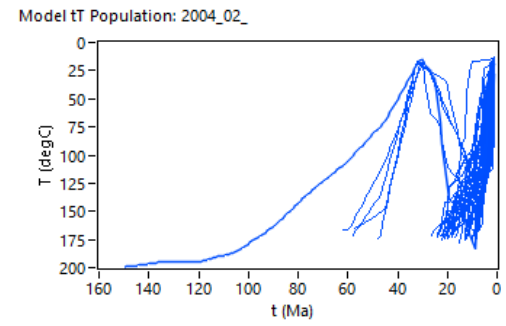

| Sample    |       | Best Fit Model  |         |         |                 |             |             |             |              |             |              |        |        | Measured     |              |              |        |        |       |      |              |        |
|-----------|-------|-----------------|---------|---------|-----------------|-------------|-------------|-------------|--------------|-------------|--------------|--------|--------|--------------|--------------|--------------|--------|--------|-------|------|--------------|--------|
| Sub-Group | Pop.  | Oldest AFT (Ma) | SFT GOF | CFT GOF | Strat. Age (Ma) | Peak t (Ma) | Peak T (°C) | Easy-Ro (%) | Basin-Ro (%) | Easy-DL (%) | AFT Age (Ma) | lc/lc0 | Isig   | AFT Age (Ma) | CI -95% (Ma) | CI +95% (Ma) | lc/lc0 | Isig   | Spots | CFTs | UPb Age (Ma) | Rmr0   |
| MM07-000  | Pop-2 | 24              | 0.9334  | 0.8381  | 24              | 24          | 173         | 1.38        | 1.12         | 1.35        | 14.9         | 0.8013 | 0.1036 | 14.2         | 5.4          | 8.7          | 0.7560 | 0.1139 | 8     | 22   | 125          | 0.7138 |

M08

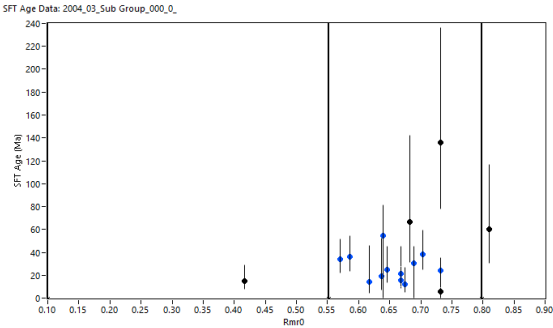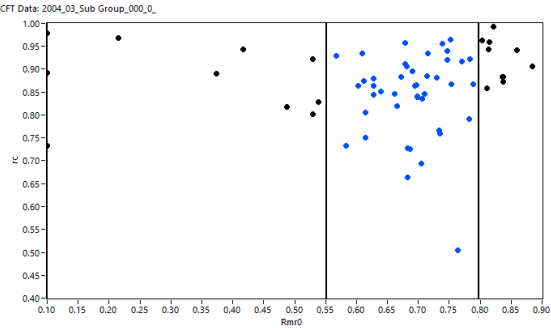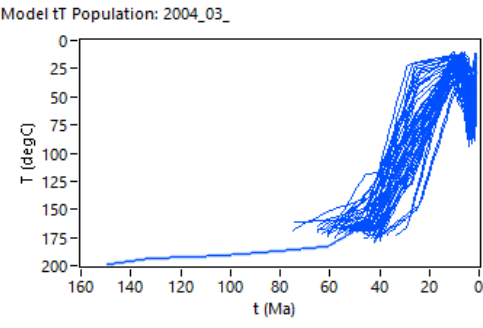

| Sample    |       | Best Fit Model  |         |         |                 |             |             |             |              |             |              |        |        | Measured     |               |              |        |        |       |      |              |        |  |
|-----------|-------|-----------------|---------|---------|-----------------|-------------|-------------|-------------|--------------|-------------|--------------|--------|--------|--------------|---------------|--------------|--------|--------|-------|------|--------------|--------|--|
| Sub-Group | Pop.  | Oldest AFT (Ma) | SFT GOF | CFT GOF | Strat. Age (Ma) | Peak t (Ma) | Peak T (°C) | Easy-Ro (%) | Basin-Ro (%) | Easy-DL (%) | AFT Age (Ma) | lc/lc0 | 1sig   | AFT Age (Ma) | CI - 95% (Ma) | CI +95% (Ma) | lc/lc0 | 1sig   | Spots | CFTs | UPb Age (Ma) | Rmr0   |  |
| MM08-000  | Pop-2 | 40              | 0.9545  | 0.9471  | 7               | 3           | 67          | 0.39        | 0.40         | 0.35        | 25.3         | 0.8209 | 0.1125 | 25.6         | 4.6           | 5.7          | 0.8449 | 0.0911 | 12    | 43   | 125          | 0.7000 |  |

# M11

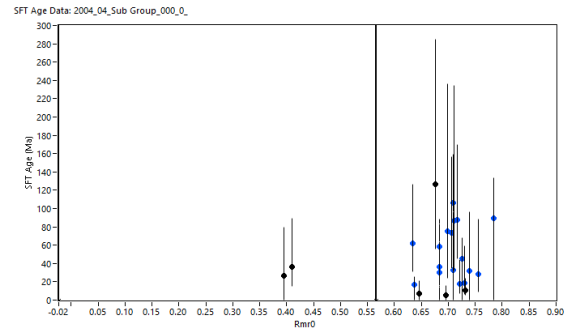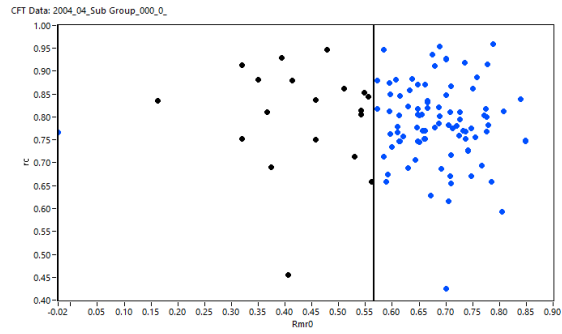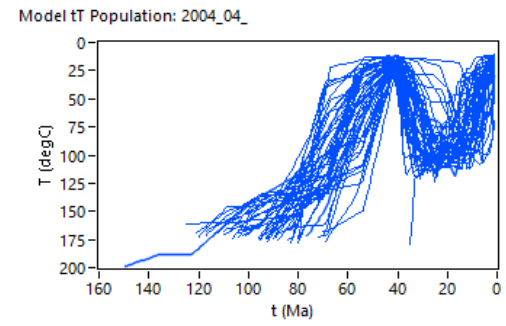

| Sample    |       | Best Fit Model  |         |         |                 |             |             |             |              |             |              |        |        | Measured     |              |              |        |        |       |      |              |        |  |
|-----------|-------|-----------------|---------|---------|-----------------|-------------|-------------|-------------|--------------|-------------|--------------|--------|--------|--------------|--------------|--------------|--------|--------|-------|------|--------------|--------|--|
| Sub-Group | Pop.  | Oldest AFT (Ma) | SFT GOF | CFT GOF | Strat. Age (Ma) | Peak t (Ma) | Peak T (°C) | Easy-Ro (%) | Basin-Ro (%) | Easy-DL (%) | AFT Age (Ma) | lc/lc0 | Isig   | AFT Age (Ma) | CI -95% (Ma) | CI +95% (Ma) | lc/lc0 | Isig   | Spots | CFTs | UPb Age (Ma) | Rmr0   |  |
| MM11-000  | Pop-1 | 83              | 0.7917  | 0.4896  | 39              | 11          | 111         | 0.66        | 0.57         | 0.54        | 43.6         | 0.7546 | 0.1120 | 40.5         | 9.1          | 11.7         | 0.7865 | 0.0873 | 17    | 91   | 125          | 0.7000 |  |

M12

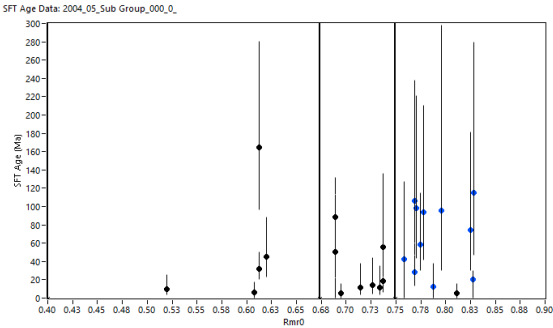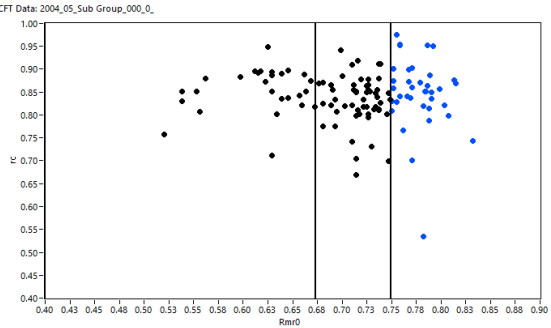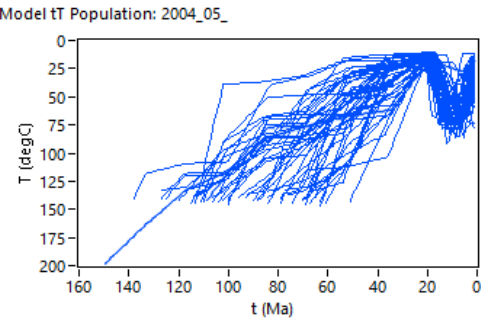

| Sample    |       | Best Fit Model  |         |         |                 |             |             |             |              |             |              |        |        | Measured     |              |              |        |        |       |      |              |        |  |
|-----------|-------|-----------------|---------|---------|-----------------|-------------|-------------|-------------|--------------|-------------|--------------|--------|--------|--------------|--------------|--------------|--------|--------|-------|------|--------------|--------|--|
| Sub-Group | Pop.  | Oldest AFT (Ma) | SFT GOF | CFT GOF | Strat. Age (Ma) | Peak t (Ma) | Peak T (°C) | Easy-Ro (%) | Basin-Ro (%) | Easy-DL (%) | AFT Age (Ma) | lc/lc0 | Isig   | AFT Age (Ma) | CI -95% (Ma) | CI +95% (Ma) | lc/lc0 | Isig   | Spots | CFTs | UPb Age (Ma) | Rmr0   |  |
| MM12-000  | Pop-1 | 78              | 0.9659  | 0.9999  | 22              | 12          | 78          | 0.44        | 0.44         | 0.40        | 55.8         | 0.8384 | 0.0765 | 55.0         | 13.8         | 18.4         | 0.8470 | 0.0785 | 11    | 37   | 125          | 0.7785 |  |

## M28

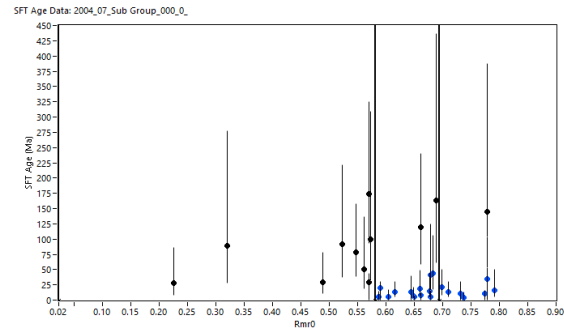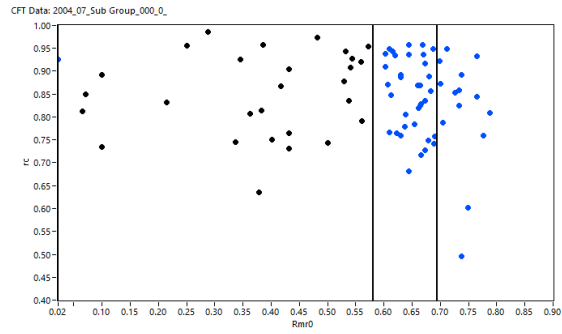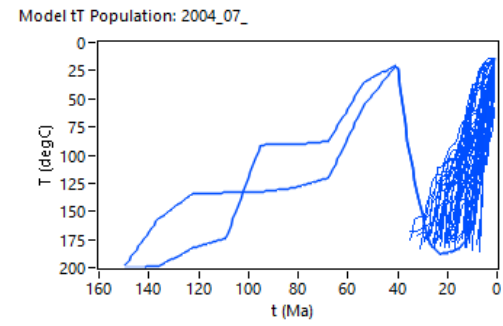

| Sample    |       | Best Fit Model  |         |         |                 |             |             |             |              |             |              |        |        | Measured     |              |              |        |        |       |      |              |        |  |
|-----------|-------|-----------------|---------|---------|-----------------|-------------|-------------|-------------|--------------|-------------|--------------|--------|--------|--------------|--------------|--------------|--------|--------|-------|------|--------------|--------|--|
| Sub-Group | Pop.  | Oldest AFT (Ma) | SFT GOF | CFT GOF | Strat. Age (Ma) | Peak t (Ma) | Peak T (°C) | Easy-Ro (%) | Basin-Ro (%) | Easy-DL (%) | AFT Age (Ma) | lc/lc0 | 1sig   | AFT Age (Ma) | CI -95% (Ma) | CI +95% (Ma) | lc/lc0 | 1sig   | Spots | CFTs | UPb Age (Ma) | Rmr0   |  |
| MM28-000  | Pop-1 | 19              | 0.9365  | 0.9998  | 19              | 19          | 166         | 1.19        | 0.86         | 1.22        | 12.8         | 0.8334 | 0.1102 | 13.2         | 5.0          | 8.0          | 0.8351 | 0.1323 | 7     | 16   | 125          | 0.7358 |  |
| MM28-000  | Pop-2 | 20              | 0.6639  | 0.8598  | 20              | 20          | 172         | 1.37        | 1.11         | 1.36        | 13.4         | 0.8334 | 0.1102 | 11.3         | 3.4          | 4.9          | 0.8469 | 0.0810 | 13    | 35   | 125          | 0.7000 |  |

## **Supplemental Material C. Full Results**

The results are shown in our Excel tables (Table S1, Table S2, and Table S3).

# Supplemental Material D. Compiled Detrital Zircon U-Pb Data

**Figure S4.** Extensive detrital zircon U-Pb data summary with MDS plot.

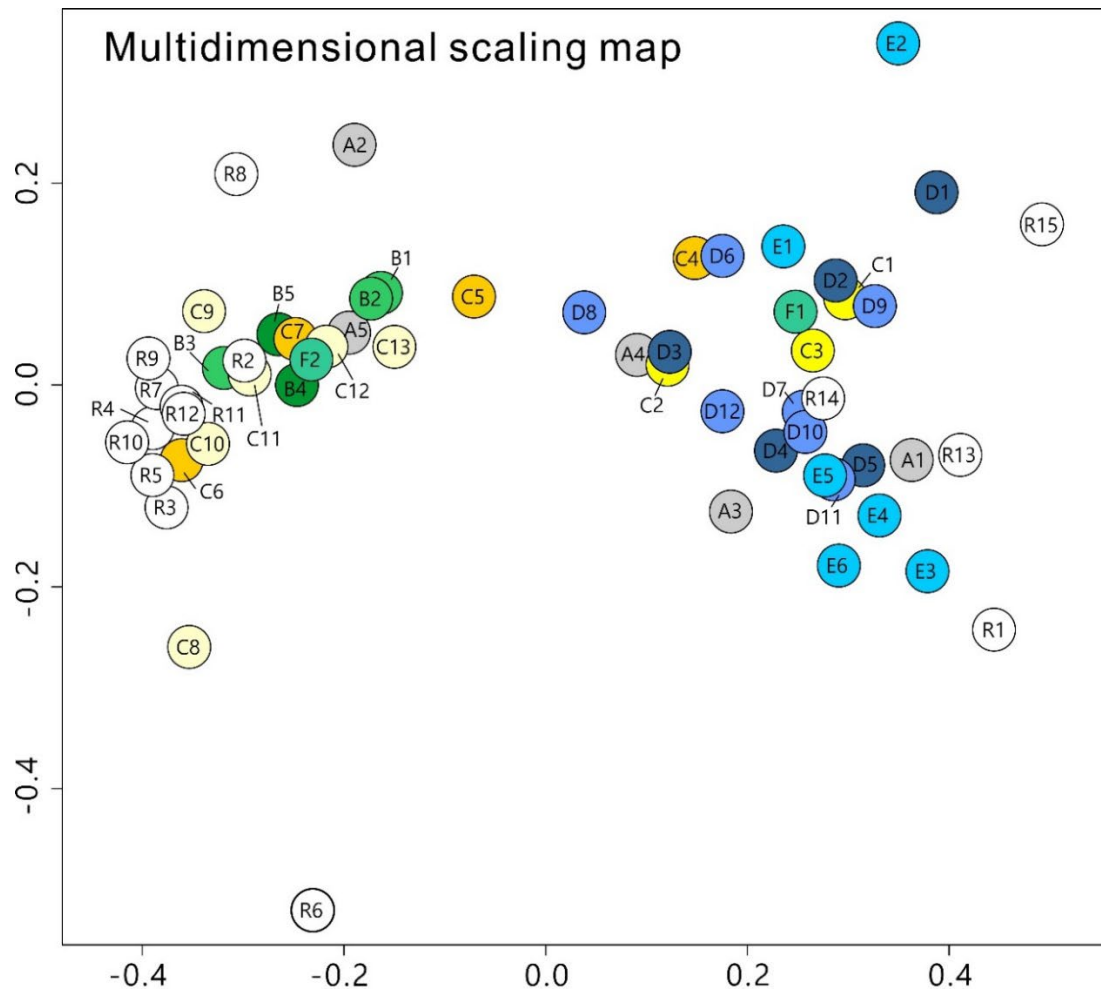

| Modern Rivers                | Himalayan forland and deepwater fans      | Indo-Burman Ranges                               | Forearc Subbasins                                        | Backarc Subbasin                                                  | Potential Sources                      |
|------------------------------|-------------------------------------------|--------------------------------------------------|----------------------------------------------------------|-------------------------------------------------------------------|----------------------------------------|
| A1 Irrawaddy River           | B1 Neogene, Himalayan Foreland            | C1 Eocene southern IBR                           | D1 Paleocene Paunggyi Fm., Chindwin                      | E1 Paleocene, Shwebo-Minwun                                       | R1 Gangdese arc                        |
| A2 Salween trunk river       | B2 Neogene, Bengal Basin                  | C2 Oligocene southern IBR                        | D2 Lower-Middle Eocene Laungshay-Pondaung Fms., Chindwin | E2 Lower Eocene Maie Fm., Shwebo-Minwun                           | R2 Paleozoic Lhasa                     |
| A3 Yarlung Tsong trunk river | B3 Paleogene, Bengal Basin                | C3 Miocene southern IBR                          | D3 Upper Eocene Yaw Fm., Chindwin                        | E3 Middle Eocene Pondaung Fm., Shwebo-Minwun                      | R3 India and Shilong plateau           |
| A4 Siang River               | B4 Bengal Fan                             | C4 Eocene central IBR                            | D4 Upper Oligocene Tonhe Fm., Chindwin                   | E4 Middle-Upper Oligocene Padaung-Okhmintaung Fms., Shwebo-Minwun | R4 Tethyan Himalaya                    |
| A5 Bramaputra River          | B5 Nicobar Fan                            | C5 Oligocene central IBR                         | D5 Miocene Letkat-Natma Fms., Chindwin                   | E5 Lower Miocene Shwetaung-Moza Fm., Shwebo-Minwun                | R5 Greater Himalaya                    |
|                              | F1 Oligocene-Miocene Andaman flysch GOLI7 | C6 Lower Miocene central IBR                     | D6 Paleocene Paunggyi Fm., Minbu                         | E6 Upper Miocene-Pliocene Irrawaddy Fm., Shwebo-Minwun            | R6 Lesser Himalaya                     |
|                              | F2 Andaman Flysch (after screening GOLI7) | C7 Mid-Miocene-Pliocene central IBR              | D7 Lower-Middle Eocene Laungshay-Pondaung Fms., Minbu    |                                                                   | R7 Naga Metamorphic rocks, IBR         |
|                              |                                           | C8 Lower Eocene Sylhet Fm., northern IBR         | D8 Upper Eocene Yaw Fm., Minbu                           |                                                                   | R8 Triassic budites, IBR               |
|                              |                                           | C9 Mid-Upper Eocene Phokphur Fm., northern IBR   | D9 Lower Oligocene Shwezetaung Fm., Minbu                |                                                                   | R9 Burma Terrane, Katha                |
|                              |                                           | C10 Mid-Upper Eocene Kopli Fm., northern IBR     | D10 Upper Oligocene Okhmintaung Fm., Minbu               |                                                                   | R10 Mogok Metamorphic rocks            |
|                              |                                           | C11 Oligocene Jenam Fm., northern IBR            | D11 Lower-Middle Miocene Pyawbwe-Obogon Fm., Minbu       |                                                                   | R11 Sibumasu Terrane                   |
|                              |                                           | C12 Lower Miocene Bhuban Fm., northern IBR       | D12 Upper Miocene-Pliocene Irrawaddy Fm., Minbu          |                                                                   | R12 Tengchong Terrane                  |
|                              |                                           | C13 Upper Mio-Pliocene Bokabil Fm., northern IBR |                                                          |                                                                   | R13 Dianxi-Burma                       |
|                              |                                           |                                                  |                                                          |                                                                   | R14 Eocene West Sumatra                |
|                              |                                           |                                                  |                                                          |                                                                   | R15 Rivers flowing Western Myanmar Arc |

**Table S4.**

Summarized detrital zircon U-Pb ages from western Myanmar and adjacent regions. The results are shown in our Excel table.
