# Supplementary material
Source: publisher figshare collection journal article supplement (https://gsapubs.figshare.com/articles/dataset/_/21326094)
Supplement: Supplementary file 1 [file 1]

## Sheet: AFT data
Table S3A. Apatite fission track dating for samples in the southern Indo-Burman Ranges and southern Minbu Subbasin
Analysis No.	FT Age (Ma)	95%-CI(Ma)	95%+CI(Ma)	UPb Age (Ma)	2 sigma (Ma)	Ns	Area cm^2	U/Cation	+/- 1sig			pz:sz UCa	pz:unk Ca	Etch Figs.	Dpar (um)	Dper (um)	[U] (ppm)	[Th] (ppm)	[Sm] (ppm)	Spike Ca	Spike 206Pb/238U	Spike 207Pb/238U	Spike 208Pb/232Th	Spike 238U/Ca	Spike 232Th/Ca	Spike 147Sm/Ca	Quality: Bkg	Quality: Bkg Iso	Quality: Q	Quality: Q Iso	Quality: Del	Quality: Del Iso	Quality: 204Pb	Quality: Mineral	rmr0	Isotopes	-	23Na wt% oxide raw	23Na wt% oxide raw 1sig	24Mg wt% oxide raw	24Mg wt% oxide raw 1sig	27Al/43Ca raw	27Al/43Ca raw 1sig	29Si/43Ca raw	29Si/43Ca raw 1sig	31P wt% oxide raw	31P wt% oxide raw 1sig	34S wt% oxide raw	34S wt% oxide raw 1sig
M23
1	13.24	10.03	41.34	199.67	192.66	2	4.8535e-05	0.025727	0.0015604			1.1504	1.0042	1	2.11	0.57	3	30	105	0.94	0.74	0.81	0.95	1.55	1.22	0.92	0		1	43Ca	1	43Ca	0.72	25.77	0.8095	39	-	0.11615	0.0112001	0.0869995	0.0124368	0.00426303	0.00337341	0.232378	0.294224	40.2642	1.43536	0.289105	0.128027
2	15.19	11.51	47.4	218.65	287.91	2	3.1062e-05	0.035022	0.0020765			1.1497	0.9986	1	2.74	0.63	3	12	42	0.57	0.98	0.62	0.79	1.46	1.63	0.6	0.010086	207Pb	1	43Ca	1	43Ca	0.68	27.18	0.7719	39	-	0.0957055	0.0060407	0.291095	0.0183752	0.00106139	0.00146698	0.407512	0.377525	35.7581	1.54662	0.221967	0.0869021
3	0	0	35.4	144.09	187.83	0	2.4268e-05	0.028808	0.0015215			1.1489	1.0112	1	2.07	0.4	5	43	40	1.28	1.23	1.02	1.14	1.1	1.2	1.22	0.0018365	206Pb	1	43Ca	1	43Ca	1.24	22.29	0.8531	39	-	0.0575302	0.00614334	0.0146073	0.00469886	0.00279787	0.00238786	0.257074	0.25956	25.7743	2.25473	0.224295	0.0730946
4	0	0	0	99.04	66.75	0	2.3297e-05	0.092262	0.0042176			1.1482	1.013	1	1.95	0.61	11	67	28	1.22	0.36	0.31	0.22	7.56	10.95	1.75	0.00078985	207Pb	1	43Ca	1	43Ca	0.7	28.36	0.8155	39	-	0.0243337	0.00447926	0.00383173	0.00179371	0.00168275	0.00254287	0.0761222	0.329034	44.3619	1.25259	0.221957	0.0803236
5	7.66	4.85	13.25	83.06	89.79	4	3.8828e-05	0.11125	0.005453			1.1475	1.0118	2	2.15	0.4	10	71	37	0.52	1.15	1.23	1.6	0.9	1.2	1.08	0.0067256	207Pb	1	43Ca	1	206Pb	0.96	29.34	0.8452	39	-	0.0464092	0.00604674	0.011019	0.00250692	0.000764636	0.00193565	0.428206	0.275121	42.8367	2.06069	0.130908	0.0914777
6	13.27	9.1	28.94	76.83	111.25	3	3.8828e-05	0.048133	0.0024361			1.1467	1.0127	2	2.05	0.27	7	48	14	1.19	0.53	0.47	1.03	1.82	1.05	0.5	0		1	43Ca	1	43Ca	0.72	27.54	0.8552	39	-	0.0365301	0.00470054	0.0216133	0.00304862	0.00182924	0.0022636	0	0	31.9647	1.87719	0.126014	0.125824
7	25	18.95	77.78	132.02	214.93	2	4.8535e-05	0.013608	0.00081176			1.146	0.9881	2	2.3	0.29	2	19	86	1.18	0.88	1.16	1.29	0.92	1.16	1.05	0.019593	207Pb	1	43Ca	1	43Ca	0.62	31.7	0.7575	39	-	0.103427	0.00892065	0.632759	0.0371859	0	0	0	0	46.698	3.222	0.168622	0.0775954
8	7.67	5.82	23.96	99.36	114.43	2	3.8828e-05	0.05549	0.0027768			1.1453	1.0109	1	2.04	0.35	7	35	70	0.97	1.02	0.97	1.15	1.39	1.27	1.5	0.0063741	206Pb	1	43Ca	1	43Ca	0.7	25.34	0.8364	39	-	0.0590378	0.00515092	0.0101126	0.00368868	0.00170961	0.00267731	0.20084	0.318313	38.5015	2.41745	0.225565	0.0724253
9	8.93	6.13	19.5	108.63	83.03	3	2.9121e-05	0.095363	0.0047664			1.1446	1.0155	2	2	0.41	9	14	30	0.69	0.65	0.72	1.22	1.43	0.85	0.43	0.0060672	208Pb	1	43Ca	1	43Ca	1.22	26.74	0.8572	39	-	0.0328622	0.00441733	0.000249178	0.00200167	0.00201603	0.00204594	0.0493364	0.30144	36.9945	1.86248	0.210477	0.0978737
10	5.91	4.05	12.9	83.99	94.86	3	3.8828e-05	0.10819	0.0051413			1.1438	1.0049	2	2.29	0.56	10	69	162	0.95	1.8	2.69	1.45	0.37	1.03	0.84	0.0040221	206Pb	1	43Ca	1	43Ca	2.05	28.05	0.7896	39	-	0.0949905	0.00528698	0.0222906	0.00365881	0.000615385	0.00244075	0	0	38.0309	1.94264	0.169293	0.0740191
11	44.2	38.25	277.94	160.13	322.56	1	3.8828e-05	0.004804	0.00042135			1.1431	0.9956	1	2.35	0.34	1	5	78	1.93	0.62	0.46	0.74	1.4	1.32	1.16	0		1	43Ca	1	43Ca	2.6	31.92	0.7562	39	-	0.0343458	0.0058876	0.482838	0.0180536	0.000807038	0.00206403	0.234921	0.195847	44.7888	1.2519	0.195292	0.051281
12	4.78	2.44	4.98	102.79	32.21	8	4.8535e-05	0.28501	0.013115			1.1424	1.0106	3	2.36	0.57	30	149	41	0.88	0.65	0.9	1.12	1.24	1.32	1.16	0.005638	207Pb	1	43Ca	1	43Ca	4.74	30.37	0.8466	39	-	0.0267393	0.00239904	0.0181394	0.00300841	0	0	0	0	44.2602	1.34397	0.187934	0.098075
13	9.86	8.53	62.88	48.57	155.39	1	4.8535e-05	0.01728	0.001004			1.1417	0.9969	1	2.68	0.65	2	22	104	1.3	0.77	0.73	1.2	1.41	1.27	0.8	0		1	43Ca	1	43Ca	3.4	28.22	0.7747	39	-	0.139876	0.0107453	0.315581	0.0133968	0.00251919	0.00149052	0.00201579	0.289414	38.8907	2.53323	0.193347	0.103547
14	16.16	12.25	50.41	66.17	106.08	2	3.3975e-05	0.030094	0.00176			1.1409	1.0018	1	2.21	0.49	4	31	115	1.02	1.84	1.22	1.02	0.91	1.23	0.86	0.013902	207Pb	1	43Ca	1	43Ca	2.73	33.02	0.7555	39	-	0.0565303	0.00791822	0.0954775	0.00946956	0.00375509	0.00218456	0	0	46.2399	1.4105	0.147451	0.0895405
15	0	0	12.88	94.85	88	0	3.8828e-05	0.049572	0.0023843			1.1402	1.0131	1	1.89	0.31	7	68	30	1.46	1.1	0.72	0.92	1.27	1.18	0.96	0.0058959	208Pb	1	43Ca	1	43Ca	4.24	29.98	0.8569	39	-	0.0589383	0.00478704	0.0181762	0.00376313	0.00308101	0.000996981	0.0259975	0.199331	40.8071	2.22951	0.192929	0.0616835
16	0	0	62.97	296.86	374.75	0	2.9121e-05	0.013469	0.00088831			1.1395	0.9987	1	2.05	0.41	2	15	87	1.63	0.57	0.59	0.65	1.16	1.07	0.92	0.00077161	207Pb	1	43Ca	1	43Ca	3.88	26.69	0.7929	39	-	0.131904	0.0118756	0.293011	0.0196326	0	0	0.151055	0.430747	37.609	1.60939	0.199031	0.113836
17	0	0	79.39	321.71	436.23	0	3.8828e-05	0.0080019	0.00056871			1.1387	1.0106	1	2.39	0.81	1	8	46	1.58	0.74	0.87	1.15	1.14	0.84	1.57	0.0091345	206Pb	1	43Ca	1	43Ca	3.14	25.69	0.8533	39	-	0.0860131	0.00800417	0.0126625	0.00297219	0.00078669	0.00197095	0.254048	0.317537	39.39	1.05491	0.151927	0.0597439
18	6.35	3.77	9.26	75.26	45.85	5	3.1062e-05	0.20957	0.0099031			1.138	1.012	2	1.72	0.34	26	27	13	1.01	1.01	1	1.48	1.04	0.85	0.46	0.0040645	208Pb	1	43Ca	1	43Ca	2.34	27.61	0.8514	39	-	0.049025	0.00454138	0.0340078	0.00318592	0.000838335	0.00181999	0	0	40.5202	1.40183	0.138006	0.0609764
19	1.71	1.48	10.94	172.06	185.82	1	4.8535e-05	0.099849	0.0058563			1.1373	1.0104	1	2.03	0.59	4	30	44	0.52	0.66	0.69	1.33	1.63	1.15	1.22	0		1	43Ca	1	43Ca	2.15	26.26	0.8476	39	-	0.0517261	0.00447228	0.0191038	0.0035967	0.0015258	0.00159073	0.085536	0.387625	43.8102	1.24389	0.138956	0.0781042
20	11.27	8.54	35.14	99.2	110.49	2	4.8535e-05	0.030226	0.00151			1.1366	1.0117	1	1.96	0.53	5	25	14	1.76	0.72	0.9	0.6	1.37	1.52	0.48	0.0070576	206Pb	1	43Ca	1	43Ca	1.29	25.83	0.8273	39	-	0.0896037	0.00640518	0.0170382	0.00294092	0.00389147	0.000986992	0	0	29.9467	1.35976	0.1424	0.0846724
21	11.62	6.51	14.81	54.52	57.77	6	4.8535e-05	0.087921	0.0041969			1.1249	0.9965	2	2.34	0.46	12	106	162	1.43	1.02	1.28	1.04	1.01	1.12	0.97	0		1	43Ca	1	43Ca	4.1	28.49	0.7378	39	-	0.0654416	0.00675203	0.227418	0.0138904	0	0	0	0	42.048	1.53082	0.169145	0.105644
22	28.47	21.57	88.33	320.09	340	2	4.3682e-05	0.013273	0.00068383			1.1242	1.0101	1	2.01	0.26	2	18	76	1.8	0.66	0.53	0.81	1.49	0.99	0.71	0.0073117	208Pb	1	43Ca	1	43Ca	1.99	26.34	0.8492	39	-	0.0762351	0.0053939	0.0107918	0.00369696	0	0	0.389318	0.25491	29.33	2.25971	0.179844	0.0958388
23	9.92	8.58	63.2	223.37	201.38	1	3.8828e-05	0.021471	0.0010941			1.1235	1.0086	1	1.96	0.38	3	17	133	1.75	0.76	0.59	0.61	1.29	1.46	1.24	0.005644	206Pb	1	43Ca	1	43Ca	1.39	28.61	0.8459	39	-	0.063385	0.00616117	0.00718117	0.00281422	0.00259888	0.00195632	0	0	44.5009	1.43041	0.223261	0.079358
24	2.9	2.51	18.55	74.72	46.55	1	2.9121e-05	0.097934	0.0046975			1.1227	1.0119	1	1.74	0.28	18	53	16	0.91	1.15	1.95	1.19	0.62	0.83	1.58	0		1	43Ca	1	43Ca	1.09	26.7	0.8558	39	-	0.106385	0.00734651	0.00873425	0.00186379	0.00210348	0.00125544	0.120663	0.294351	42.584	1.7377	0.184214	0.0813089
25	0	0	110.32	83.91	256.88	0	2.9121e-05	0.0076595	0.00054205			1.122	0.9948	1	2	0.32	1	11	98	15	0.12	0.06	0.55	4.91	0.64	1.39	0.016501	206Pb	1	43Ca	1	43Ca	1.04	34.43	0.765	39	-	0.0418466	0.00404658	0.454631	0.029732	0.0030222	0.00446996	0	0	45.1921	1.33096	0.159181	0.0577234
26	0.89	0.53	1.3	91.99	31.04	5	4.8535e-05	0.96027	0.046058			1.1213	1.0101	4	2.11	0.41	24	118	42	0.51	0.9	0.78	1.04	1.25	1.03	0.88	0.0024353	206Pb	1	43Ca	1	207Pb	1.11	27.86	0.8413	39	-	0.117638	0.0075832	0.00640936	0.00383347	0.00961282	0.00173128	0	0	42.9124	1.03248	0.197126	0.087946
27	4.53	3.43	14.14	112.65	100.68	2	4.3682e-05	0.083661	0.0040221			1.1206	1.0122	1	1.56	0.56	12	112	23	0.47	1.27	1.16	0.87	0.9	1.17	0.89	0.0045486	206Pb	1	43Ca	1	43Ca	1.08	32.09	0.8532	39	-	0.0395542	0.005631	0.0150216	0.00351748	0	0	0.108562	0.225726	46.5565	0.9304	0.181152	0.125823
28	6.34	3.23	6.59	71.73	19.7	8	4.8535e-05	0.21496	0.0092853			1.1198	1.0132	3	1.62	0.33	33	83	22	1.53	0.64	0.87	0.85	1.23	1	1.02	0.004485	208Pb	1	43Ca	1	43Ca	1.32	29.26	0.8585	39	-	0.0338331	0.00470235	0.00419708	0.0017641	0.00727657	0.00239328	0.0150662	0.306155	40.7766	1.14533	0.22213	0.129329
29	12.96	11.21	82.48	103.09	192.35	1	3.1062e-05	0.020531	0.0011034			1.1191	0.9985	1	2.08	0.44	3	29	127	1.79	0.93	0.8	0.77	1.14	1	0.99	0.0037211	207Pb	1	43Ca	1	43Ca	2.05	32.13	0.7702	39	-	0.078982	0.00768263	0.229702	0.0224144	0.0022874	0.00248048	0	0	44.2502	2.24993	0.26492	0.0743238
30	22.93	12.23	26.14	104.8	89.33	7	2.9121e-05	0.086567	0.0041693			1.1184	1.0115	1	2.41	0.81	11	92	43	1.13	0.83	0.63	0.59	1.56	2.26	1.4	0.010977	207Pb	1	43Ca	1	43Ca	2.02	26	0.846	39	-	0.0909336	0.00527273	0.00646906	0.00375184	0.000921657	0.00157652	0	0	35.5456	1.52406	0.186303	0.0441882
31	14.56	12.59	92.59	130.73	166.43	1	3.1062e-05	0.018277	0.0010235			1.1176	0.9993	1	2.29	0.55	3	19	189	1.22	1.4	1.37	0.89	0.93	1.37	1.02	0.004023	208Pb	1	43Ca	1	43Ca	1.71	28.83	0.7931	39	-	0.0767206	0.00560077	0.16416	0.00731279	0.0035557	0.00169046	0	0	37.8883	1.46706	0.116421	0.0638778
32	5.37	4.07	16.75	102.31	102.31	2	4.8535e-05	0.063497	0.0029513			1.1174	1.0153	1	1.95	0.33	7	57	28	1.14	0.58	0.56	0.53	2.23	2.09	1.9	0.0040522	208Pb	1	43Ca	1	43Ca	4.63	29.74	0.8533	39	-	0.0160612	0.00395493	0.0110067	0.00204652	0	0	0.0924654	0.278385	42.123	1.02202	0.216133	0.129557
33	8.36	7.23	53.37	144.57	142.43	1	3.8828e-05	0.025475	0.0014639			1.118	1.0009	1	1.49	0.31	4	27	100	0.55	1.55	1.03	0.9	0.76	0.92	0.59	0.0020082	238U	1	43Ca	1	43Ca	3.1	30.41	0.7563	39	-	0.0782958	0.00493259	0.184639	0.00867149	0.00243153	0.00153561	0.0405627	0.318769	43.3521	1.62547	0.156356	0.0870852
34	0	0	103.75	122.5	235.3	0	3.8828e-05	0.0061114	0.00042805			1.1185	0.9951	1	1.81	0.32	1	7	89	1.8	0.79	1.47	0.98	0.81	1.04	1.01	0.047829	206Pb	1	43Ca	1	43Ca	2.61	30.77	0.7775	39	-	0.0316093	0.00451498	0.487406	0.0294961	0.000668168	0.00204664	0.123429	0.327921	44.3905	1.974	0.169591	0.0673727
35	51.28	35.16	110.88	199.2	228.79	3	3.0577e-05	0.015766	0.00082786			1.1191	0.9948	1	1.6	0.54	3	49	174	0.68	2.24	2.17	1.82	0.56	0.56	0.61	0.36401	235U	1	43Ca	1	43Ca	5.3	29	0.7983	39	-	0.211824	0.0107657	0.179297	0.00984996	0.00596819	0.0014685	0	0	41.6622	1.16126	0.165417	0.0695872
36	9.36	8.09	59.71	253.29	332.2	1	4.8535e-05	0.018203	0.0010546			1.1197	1.013	1	1.85	0.34	2	23	45	1.58	0.68	0.64	1.29	1.74	1.07	1.72	0.0041525	208Pb	1	43Ca	1	43Ca	1.95	29.76	0.8544	39	-	0.0375349	0.00393088	0.00439951	0.00326619	0.00166029	0.00212564	0	0	43.1077	2.24457	0.133418	0.0832114
37	31.13	23.63	97.26	266.68	327	2	3.8828e-05	0.013654	0.0011373			1.1202	0.9948	2	1.93	0.4	1	9	93	0.52	0.57	0.88	1.5	2.01	0.93	1.22	0.012881	208Pb	1	43Ca	1	43Ca	1.37	27.48	0.7747	39	-	0.035154	0.00553217	0.502582	0.015813	0.00170108	0.00214119	0.0482199	0.282296	38.4568	1.14195	0.277938	0.0633403
38	12.38	10.71	78.85	119.96	125.94	1	2.9121e-05	0.022919	0.0012292			1.1208	1.0127	1	2	0.35	4	23	49	1.54	1.68	1.66	1.03	0.5	1.01	0.89	0.0046516	206Pb	1	43Ca	1	43Ca	2.39	34.59	0.8483	39	-	0.0195891	0.00380075	0.0324921	0.00391616	0.000534633	0.00192764	0.0532721	0.312727	45.7377	2.57029	0.196546	0.0770561
39	2.9	2.51	18.54	126.17	136.77	1	4.8535e-05	0.058812	0.002864			1.1213	1.0076	1	2.2	0.27	6	29	104	0.98	0.53	0.63	1.1	2	1.19	1.09	0.0013771	208Pb	1	43Ca	1	43Ca	2.42	31.8	0.8475	39	-	0.0740029	0.00839264	0.0136751	0.00227431	0	0	0.102895	0.375245	45.8429	1.81744	0.228222	0.111219
40	11.78	6.6	15	83.86	42.86	6	2.9121e-05	0.14457	0.0067806			1.1219	1.0149	3	2.05	0.34	22	16	11	1.93	0.72	1.3	1.08	0.93	0.85	1.08	0.0026098	208Pb	1	43Ca	1	43Ca	2.75	29.51	0.8541	39	-	0.0265617	0.00341566	0.0105153	0.0037018	0.000675951	0.00179713	0	0	41.855	1.41828	0.257841	0.0781017
M25
1	48.79	42.2	304.85	73.37	189.82	1	2.4268e-05	0.0069602	0.00044983			1.1308	0.9952	1	1.87	0.41	1	6	37	1.87	1	0.52	1.32	1.08	0.74	0.88	0		1	43Ca	1	43Ca	6.39	32.52	0.7762	39	-	0.0295316	0.00604966	0.555217	0.0447182	0.00103296	0.00217514	0.0809998	0.285769	49.9415	2.08333	0.200468	0.120371
2	11.29	9.76	71.96	212.93	224.11	1	3.1062e-05	0.023579	0.0014258			1.1313	1.0113	1	2.31	0.36	3	22	28	1.57	1.26	1.34	0.69	0.7	1.33	3.76	0.0023018	206Pb	1	43Ca	1	43Ca	7.19	28.2	0.8568	39	-	0.0613602	0.00538949	0.0207724	0.00294514	0.000453554	0.00187984	0.0505555	0.201943	41.1896	2.75245	0.23866	0.116942
3	0	0	30.37	74.16	165.35	0	4.3682e-05	0.018665	0.0010285			1.1319	0.9966	1	2.23	0.49	2	14	86	1.58	0.75	0.54	0.95	1.23	1.09	1.15	0.012385	206Pb	1	43Ca	1	43Ca	1.5	28.13	0.7399	39	-	0.0325565	0.00663462	0.301924	0.0234417	0.00411696	0.00159663	0.150807	0.25733	44.1962	2.09318	0.202288	0.0675275
4	36.99	28.03	114.62	93.96	158.37	2	3.3975e-05	0.013127	0.00077114			1.1324	0.9955	2	2.8	0.4	2	14	121	1.6	1.96	1.37	1.39	0.82	0.82	0.84	0.031036	206Pb	1	43Ca	1	43Ca	1.57	33.36	0.767	39	-	0.0575608	0.00588779	0.330483	0.0215968	0.00374655	0.00175375	0.120588	0.241226	46.4562	2.39636	0.209674	0.087211
5	0	0	21187.8	0	0	0	2.3782e-05	6.2852e-06	1.0151e-05			1.133	1.0158	1	1.85	0.48	0	0	10	1.65	0	0	119.78	0	0.01	0.78	0.019054	208Pb	1	43Ca	1	43Ca	0.59	25.99	0.8573	39	-	0	0	0.00791146	0.00202269	0	0	0	0	47.233	1.93748	0.0613591	0.071977
6	23.36	17.7	72.57	157.41	174.93	2	3.8828e-05	0.018208	0.00091773			1.1335	0.9968	2	2.71	0.76	3	14	55	1.25	0.72	0.69	0.85	1.35	1.3	0.99	0.0066683	208Pb	1	43Ca	1	43Ca	1.3	30.12	0.769	39	-	0.151608	0.00708753	0.240935	0.0130348	0.00387791	0.00278609	0	0	46.508	2.1657	0.144039	0.118395
7	6.82	5.17	21.31	274.66	185.01	2	3.8828e-05	0.062455	0.0034198			1.1336	0.9925	2	3.23	0.74	5	62	145	0.7	1.49	1.72	2.07	0.76	0.59	0.59	0.0059827	206Pb	1	43Ca	1	43Ca	0.83	31.91	0.7054	39	-	0.17662	0.0125879	0.272768	0.0190276	0.00292681	0.00190773	0	0	42.7848	2.77486	0.233098	0.118727
8	9.9	8.57	63.14	123.3	193.19	1	3.8828e-05	0.021494	0.0011103			1.1337	0.9963	1	2.23	0.58	3	19	62	1.54	0.78	1.03	1.79	1.22	0.73	0.58	0		1	43Ca	1	43Ca	1.23	31.97	0.7169	39	-	0.112763	0.00796072	0.280266	0.0169566	0.00199147	0.00434092	0.043508	0.316218	43.7362	1.85121	0.223261	0.119712
9	19.03	16.46	120.82	312.15	341.27	1	3.8828e-05	0.011177	0.00066271			1.1337	0.997	1	2.52	0.55	2	13	50	3.03	0.33	0.36	7.7	2.09	0.08	0.39	0.0047561	206Pb	1	43Ca	1	43Ca	2.16	34.51	0.7028	39	-	0.154427	0.0137648	0.162961	0.0183555	0.0174293	0.00523256	0.0667894	0.309559	48.6422	2.8555	0.229535	0.104618
10	0	0	154.73	0	0	0	3.3975e-05	0.0046645	0.00050364			1.1337	0.9934	1	2	0.44	1	5	74	1.84	1.42	0.76	1.26	0.77	0.71	0.7	0.018882	207Pb	1	43Ca	1	43Ca	8.1	36.9	0.706	39	-	0.0435848	0.00507232	0.447235	0.0299993	0.00554677	0.00213529	0.0725047	0.20219	53.3298	3.31284	0.119974	0.0692895
11	2.56	2.22	16.4	105.62	50.86	1	3.1062e-05	0.10387	0.0047258			1.1337	1.0143	1	1.94	0.55	14	31	21	1.87	1.29	1.39	1.46	0.69	0.74	1.2	0.013045	207Pb	1	43Ca	1	43Ca	35.4	31.38	0.8584	39	-	0.0455544	0.00431465	0.00609334	0.00211097	0.00214055	0.00208714	0	0	45.3871	3.31798	0.246442	0.0665893
12	5.63	3.34	8.2	104.09	46.23	5	4.3682e-05	0.1682	0.0075023			1.1337	1.0136	3	1.79	0.29	26	18	13	2.02	1.04	1.42	0.99	0.85	0.91	0.88	0.00049048	208Pb	1	43Ca	1	43Ca	5.29	31.24	0.8488	39	-	0.0511936	0.0051308	0.0097725	0.00340829	0.00180449	0.0015097	0	0	41.4583	2.06327	0.279093	0.0720349
13	8.99	5.7	15.55	113.13	60.45	4	4.8535e-05	0.075772	0.0036433			1.1338	1.0127	3	2.12	0.37	11	64	44	1.95	1.03	0.66	0.89	1.13	0.92	0.72	0.0039228	206Pb	1	43Ca	1	43Ca	2.62	31.49	0.8511	39	-	0.0482418	0.00577281	0.00123896	0.00299194	0.00177395	0.00214337	0.0252083	0.272393	47.0679	2.42716	0.246686	0.0805424
14	16.27	12.33	50.64	171.17	214.34	2	4.8535e-05	0.020921	0.00098086			1.1338	0.9962	1	2.32	0.51	3	17	99	2.18	0.55	0.57	0.59	1.22	1.01	1.07	0.0043632	208Pb	1	43Ca	1	43Ca	1.91	30.09	0.7257	39	-	0.0667216	0.00844816	0.256795	0.0157194	0.000419266	0.00180649	0	0	47.5071	2.16825	0.254891	0.0914847
15	0	0	10266.5	0	0	0	2.3782e-05	4.1333e-05	3.4268e-05			1.1338	1.017	1	1.81	0.41	0	0	7	2.25	0	0	0	0	0	0.27	0.096347	208Pb	1	43Ca	1	43Ca	1.59	29.49	0.8634	39	-	0.0039016	0.00300998	0	0	0	0	0	0	41.6581	3.04702	0.217341	0.146167
16	13.41	9.2	29.26	175.5	151.92	3	4.3682e-05	0.042316	0.0021542			1.1338	1.0091	3	2.48	0.67	5	28	56	1.23	0.85	0.69	1.02	1.38	1.31	0.72	0.0056732	207Pb	1	43Ca	1	43Ca	1.54	33.6	0.8021	39	-	0.0490232	0.00740481	0.0140459	0.00427659	0.0052697	0.00330545	0	0	50.797	2.66395	0.150691	0.0784144
17	6.73	5.82	42.95	90.47	105.61	1	3.8828e-05	0.031655	0.0015735			1.1338	0.994	1	2.46	0.62	4	31	120	1.89	0.55	0.34	0.58	1.2	1.39	1.21	0.019291	207Pb	1	43Ca	1	43Ca	0.77	31.69	0.7417	39	-	0.0626687	0.00495411	0.329707	0.0158657	0.0285817	0.0018005	0	0	47.9875	1.92235	0.204078	0.115359
18	28.69	21.74	89.16	142.57	224.13	2	4.8535e-05	0.011857	0.00072324			1.1339	0.9975	1	2.59	0.42	1	7	30	1.14	0.59	0.47	0.65	1.91	1.62	0.5	0		1	43Ca	1	43Ca	1.3	31.56	0.7267	39	-	0.0846213	0.00729753	0.320901	0.0155586	0.00336649	0.00151125	0	0	41.879	2.86143	0.141849	0.112198
19	0	0	197.48	232.8	287.54	0	3.8828e-05	0.0031873	0.00025521			1.1339	0.9931	1	1.77	0.48	1	5	62	1.67	0.1	0.23	0.58	0.99	0.18	0.58	0.034413	206Pb	1	43Ca	2	232Th	2.75	28.19	0.8009	39	-	0.0319927	0.00499011	0.621468	0.0258465	0.00420156	0.0015493	0.189838	0.145943	40.738	1.8442	0.301353	0.0889915
20	19.94	7.45	11.88	112.36	28.26	19	2.4268e-05	0.32438	0.014178			1.1339	1.0079	4	3.16	0.72	44	187	33	1.51	0.83	0.82	1.02	1.1	1.05	0.72	0.00059391	208Pb	1	43Ca	1	43Ca	5.1	32.07	0.7916	39	-	0.107773	0.00651566	0.0314625	0.00389575	0.00210594	0.00305	0.0153939	0.254343	50.0278	1.71002	0.129395	0.0977978
21	15.32	13.25	97.61	98.05	113.7	1	3.8828e-05	0.013893	0.0009831			1.1342	1.0021	1	2.28	0.4	2	47	89	1.97	1.49	1.32	1.3	0.55	0.89	1.06	0.0078692	208Pb	1	43Ca	1	43Ca	1.18	29.11	0.8224	39	-	0.0201115	0.00605195	0.241645	0.0204642	0.00296102	0.00215787	0.164329	0.272364	39.5047	2.28679	0.242104	0.053314
22	14.77	11.19	46	234.57	151.06	2	2.3782e-05	0.047034	0.0022339			1.1343	1.0051	1	2.14	0.4	7	33	109	1.93	0.89	0.88	1.35	1.05	0.82	1.07	0.00055514	206Pb	1	43Ca	1	43Ca	2.59	30.07	0.8285	39	-	0.0733187	0.00718641	0.0993569	0.00915149	0.00240523	0.00180015	0	0	37.776	2.59113	0.214821	0.113436
23	16.54	14.3	105.09	102.61	161.15	1	3.8828e-05	0.012868	0.00073996			1.1343	0.9968	1	2.28	0.68	2	20	114	1.74	0.83	0.64	0.58	1	1.21	0.8	0.025045	207Pb	1	43Ca	1	43Ca	1.14	29.1	0.7342	39	-	0.0451409	0.00649463	0.276892	0.013669	0.0144566	0.00536154	0.0553446	0.175652	32.9816	2.11987	0.284307	0.0963393
24	42.34	36.61	265.43	311.65	378	1	3.1062e-05	0.0062702	0.00040209			1.1343	0.9902	1	1.66	0.58	1	8	52	1.53	0.68	0.66	1.28	1.47	0.65	0.92	0.028611	207Pb	1	43Ca	1	43Ca	1.47	32.17	0.7568	39	-	0.055813	0.00577966	0.614758	0.0301263	0.00661996	0.00217577	0	0	41.683	2.27914	0.198333	0.0576018
25	18.64	16.12	118.26	0	0	1	4.8535e-05	0.0091302	0.00047856			1.1343	0.9949	1	2.37	0.43	2	13	123	1.92	1.4	1.33	0.74	0.74	1.18	0.77	0.01588	206Pb	1	43Ca	1	43Ca	2.18	30.92	0.722	39	-	0.0638558	0.00847346	0.374156	0.0240259	0.000841444	0.00192021	0	0	36.4161	1.73368	0.27685	0.0973697
26	7.31	6.32	46.66	74.56	84.17	1	3.8828e-05	0.029132	0.0014687			1.1343	0.9978	1	2.39	0.44	4	29	129	1.79	0.61	0.83	0.8	1.1	1.01	1.24	0		1	43Ca	1	43Ca	3.57	32.43	0.7384	39	-	0.0478249	0.00753777	0.24254	0.0159324	0.00208624	0.0018836	0.270506	0.176155	42.2968	2.16606	0.212689	0.0867564
27	20.8	17.99	131.95	522.05	544.19	1	3.8828e-05	0.010229	0.00064592			1.1344	1.0029	1	2.39	0.48	2	13	164	1.36	2.52	1.9	1.26	0.56	0.84	1.14	0.0015098	208Pb	1	43Ca	1	43Ca	2.83	29.12	0.7847	39	-	0.139836	0.00955857	0.0238146	0.00500687	0.000983491	0.002736	0	0	43.5134	2.04241	0.19607	0.0627831
28	0	0	84.51	241.91	545.33	0	4.8535e-05	0.0060114	0.00058754			1.1344	0.9946	1	2.31	0.54	1	7	78	1.32	0.74	0.78	0.9	1.44	1.33	1.26	0.0039824	208Pb	1	43Ca	1	43Ca	2.4	29.19	0.7728	39	-	0.0907388	0.00847881	0.464721	0.0248156	0.0037833	0.00194775	0.0397139	0.154659	42.3708	1.14772	0.193727	0.0917335
29	30.42	23.04	94.28	127	116.73	2	2.4268e-05	0.022361	0.0011253			1.1344	1.0103	2	1.91	0.34	4	35	65	1.72	2.15	1.51	1.95	0.62	0.84	0.61	0.0098853	206Pb	1	43Ca	1	43Ca	3.42	30.53	0.8385	39	-	0.0686295	0.00703441	0.0175143	0.00388968	0.0260713	0.00990794	0.0868752	0.252978	35.2675	1.40275	0.167282	0.0993122
30	0	0	0	0	0	0	3.8828e-05	0	0			1.1344	0.8465	1	2.27	0.42	0	56	86	25.6	0	0	0	0	0	0	0.0075833	206Pb	1	43Ca	2	206Pb	13.07	22.07	0	39	-	0.0805849	0.0351586	5.95787	0.333516	30.1669	1.35647	0.106943	1.33652	22.7492	0.742498	0.0335372	0.500882
31	45.49	39.35	285.01	320.62	488.27	1	3.8828e-05	0.0046675	0.0003336			1.1344	0.9919	1	2.32	0.44	1	5	85	1.92	0.73	0.87	1.04	0.92	0.86	0.73	0.0029348	207Pb	1	43Ca	1	43Ca	2.72	31.56	0.7047	39	-	0.167996	0.00906408	0.378584	0.0181543	0.0219395	0.00232155	0	0	52.6554	1.14163	0.167508	0.0660034
32	15.3	13.24	97.32	119.98	287.4	1	4.8535e-05	0.011126	0.0006395			1.1345	0.9972	1	2.12	0.41	2	7	35	2.02	0.93	0.89	1.39	0.85	0.73	0.72	0.0081384	208Pb	1	43Ca	1	43Ca	3.2	30.92	0.7456	39	-	0.0578017	0.00554984	0.395518	0.0214098	0	0	0.141979	0.195399	43.1785	2.16224	0.0695137	0.096914
33	26.63	20.17	82.65	75.55	126.91	2	4.8535e-05	0.012777	0.00066529			1.1345	0.9928	2	2.89	0.55	2	13	96	1.78	0.97	1.77	1.41	0.94	0.78	0.94	0		1	43Ca	1	43Ca	2.76	30.66	0.7517	39	-	0.0357721	0.00416174	0.525673	0.03584	0.0309979	0.00428149	0.0611421	0.183442	43.5566	1.99988	0.0882687	0.0866233
34	7.41	6.41	47.33	121.38	138.98	1	3.3975e-05	0.032824	0.0016964			1.1345	0.9967	1	2.48	0.51	4	26	122	1.34	1.38	1.24	0.88	1.17	1.25	1.06	0.00043799	208Pb	1	43Ca	1	43Ca	1.08	32.13	0.7387	39	-	0.0458585	0.00519595	0.289597	0.0204732	0.00053756	0.00261869	0	0	39.1777	1.92195	0.272067	0.0709953
35	10.69	8.1	33.34	121.07	170.2	2	2.0385e-05	0.075837	0.0036798			1.1345	0.9294	1	1.96	0.32	8	250	98	1.35	0.55	1.24	2.11	2.49	0.57	0.17	0.01297	206Pb	1	43Ca	2	43Ca	2.03	18.53	0	39	-	0.0736161	0.0129346	2.66425	0.0785298	10.8391	0.186365	0.323267	0.545037	21.9648	0.387994	0.215545	0.231627
36	10.88	7.47	23.77	175.56	165.42	3	3.4945e-05	0.065211	0.003524			1.1345	1.0116	3	2.19	0.36	5	40	49	0.61	0.92	1.04	1.94	1.13	1.01	0.52	0.00049873	206Pb	1	43Ca	2	43Ca	1.74	32.07	0.8501	39	-	0.049767	0.00593228	0.0219251	0.00332196	0.00128205	0.00206019	0	0	41.518	1.51556	0.240337	0.0687066
37	15.81	13.67	100.43	249.92	282.08	1	4.3682e-05	0.011965	0.00060386			1.1346	0.9982	1	2.52	0.81	2	12	50	1.76	0.82	0.86	0.56	1.32	1.55	0.58	0.032262	207Pb	1	43Ca	1	43Ca	1.71	26.96	0.7684	39	-	0.0966061	0.00976475	0.420531	0.0226647	0.00271727	0.00227111	0	0	35.0359	1.31668	0.156739	0.100463
38	22.19	19.2	140.73	9.02	256.7	1	2.9121e-05	0.012777	0.00081637			1.1346	1.0115	1	1.93	0.3	2	14	26	1.26	0.93	0.67	1.24	1.24	1.04	0.67	0.0025547	208Pb	1	43Ca	1	43Ca	3.13	30.74	0.8477	39	-	0.0831297	0.00540662	0.00434615	0.00272863	0.00174649	0.00177912	0	0	45.3336	2.24931	0.144237	0.126415
39	22.01	15.1	47.9	72.97	97.11	3	3.8828e-05	0.028994	0.0014406			1.1346	0.9913	1	2.49	0.6	4	25	126	1.44	0.91	0.87	1.76	1.26	1.06	1.01	0.037715	206Pb	1	43Ca	1	43Ca	2.14	28.16	0.7547	39	-	0.0645331	0.00566334	0.503945	0.0290117	0.00218698	0.00163523	0.122172	0.267863	41.0158	1.16091	0.152378	0.063729
40	9.2	7.96	58.66	137.11	206.27	1	4.8535e-05	0.018519	0.00096459			1.1346	0.9971	1	2.51	0.28	2	18	136	1.93	0.56	0.76	1.15	1.34	0.94	1.07	0.77519	235U	1	43Ca	1	43Ca	2.11	29.32	0.7426	39	-	0.06474	0.00561747	0.304086	0.0226365	0.00172726	0.00247214	0	0	38.265	1.70536	0.224025	0.0587322
M211
1	14.06	10.7	44.71	0	0	2	1.1648e-05	0.10093	0.011821			1.1797	0.9411	1	2.1	0.39	3	69	68	36.88	0	0	0	0	0	0	0.039514	207Pb	1	43Ca	2	208Pb	3.46	27.32	0.7831	39	-	0.622889	1.32555	1.60073	0.422351	31.2502	8.70473	47.8307	71.2529	27.0949	17.6264	28.3445	29.9866
2	0	0	0	0	0	1	9.707e-06	0	0			1.1808	0.3161	1	2.19	0.35	0	45	0	7.87	0	0	0	0	0	0	0		1	43Ca	1	43Ca	4.86	5.48	0	39	-	22.8854	20.408	30.8532	27.1797	635.947	556.818	13.4492	199.442	26.0313	58.906	61.2815	93.7692
3	0	0	0	0	0	0	1.7473e-05	0.0029079	0.00026117			1.1819	0.6587	1	2.04	0.42	0	96	87	29.31	0	0	0	0	0	176.73	0.0016536	207Pb	1	43Ca	1	43Ca	5.01	18.82	0	39	-	0.0877008	0.0183685	11.6455	0.439732	99.3046	2.58732	1.78736	0.824491	22.383	0.491722	0.188418	0.325153
4	68.51	59.69	447.83	0	0	1	1.1648e-05	0.010311	0.0024232			1.183	0.7951	1	2.01	0.41	2	35	38	1164.93	0	0	0	0	0	0	0.011962	207Pb	1	43Ca	1	43Ca	4.84	0	0	39	-	0.907147	0.257509	5.74342	0.70534	135.914	13.2088	8.49604	16.179	5.80008	6.56965	4.92527	10.7795
5	0	0	0	0	0	1	1.1648e-05	0	0			1.1841	0.9112	1	2.04	0.33	0	116	119	516.94	0	0	0.78	0	0.38	0	0		1	43Ca	1	43Ca	5.61	18.03	0	39	-	0	0	1.53161	0.213563	27.719	8.25922	4.75981	58.7076	23.2989	7.82038	3.95808	12.821
6	0	0	0	204.2	294.93	1	9.707e-06	0.042669	0.0024243			1.1852	1.0129	1	2.02	0.39	5	35	45	14.43	0.33	0.24	0.37	8.92	6.2	0	0.0019414	208Pb	1	43Ca	1	43Ca	5.29	30.49	0.8454	39	-	0.0412941	0.00490542	0.00281522	0.00251314	0.0107039	0.0354685	0	0	41.2674	1.9461	0.156263	0.0932749
7	0	0	0	0	0	2	2.3782e-05	0	0			1.1863	0.1753	2	2.06	0.33	0	20	78	141.11	0	0	0	0	0	0	0.00070105	207Pb	1	43Ca	2	208Pb	398.01	1.41	0	39	-	3.77127	1.27831	26.1645	5.39217	320.942	62.4856	57.413	62.8588	11.417	20.2907	16.9062	21.473
8	0	0	232.95	0	0	0	1.7473e-05	0.0059879	0.0018425			1.1874	0.7634	1	2.31	0.31	1	117	129	0	0	0	0	0	0	0	0.0038513	206Pb	1	43Ca	2	206Pb	22.93	22.84	0	39	-	0.562535	0.251087	6.10601	1.13904	30.5562	5.44291	9.7418	23.3332	28.6956	5.70588	0	0
9	106.29	91.88	644.13	0	0	1	9.707e-06	0.0079518	0.00054235			1.1884	0.9949	1	2.43	0.37	1	7	63	27.76	0	0	0.2	0	0.53	0.81	0.0029579	208Pb	1	43Ca	1	43Ca	2.16	29.27	0.6778	39	-	0.0807851	0.006634	0.274255	0.0245742	0.0021912	0.0719487	0	0	41.2846	1.44305	0.208771	0.110307
10	41.69	28.6	90.43	107.79	264.9	3	4.8535e-05	0.012225	0.00067459			1.1895	1.0075	2	2.44	0.35	1	7	64	1.58	0.45	0.38	0.38	2.21	2.06	0.56	0.0011716	208Pb	1	43Ca	1	43Ca	0.84	29.61	0.8324	39	-	0.0867368	0.00586124	0.0353376	0.00461057	0	0	0.0615315	0.237188	42.2175	3.19945	0.087082	0.0930649
11	16.75	11.49	36.46	102.26	121.92	3	1.4561e-05	0.10163	0.004536			1.1906	1.0088	1	2	0.46	14	36	70	1.87	0.26	0.15	0.37	0.5	0.26	0.61	0		1	43Ca	2	208Pb	6.97	29.89	0.8359	39	-	0.0770343	0.00850876	0.0173815	0.00415884	0.00405042	0.00475194	0.0984047	0.237434	43.5534	1.4939	0.222211	0.115561
12	7.17	6.2	45.78	84	119.71	1	3.8828e-05	0.029706	0.0015846			1.1917	1.01	1	2.45	0.67	4	11	43	2	0.89	0.83	0.81	1.1	0.94	1.47	0.0043053	208Pb	1	43Ca	1	43Ca	3.77	25	0.8275	39	-	0.116468	0.00815608	0.0194166	0.0038238	0.00202638	0.00178284	0	0	40.2736	1.83214	0.12036	0.109455
13	18.74	10.89	25.96	0	0	7	3.4945e-05	0.088276	0.019053			1.1928	0.8381	4	2	0.41	1	95	184	2.76	0	0	0	0	0	0	0.0048327	208Pb	1	43Ca	1	43Ca	4.46	29.26	0	39	-	0.537057	0.454235	4.0389	0.4813	35.8031	2.81656	0	0	40.7124	5.83404	5.98118	8.78657
14	29.22	20.04	63.48	126.49	134.43	3	2.4268e-05	0.034918	0.0017232			1.1939	1.0091	1	2.09	0.53	4	34	77	2.08	0.55	0.53	0.49	0.7	0.65	0.71	0.014011	206Pb	1	43Ca	1	43Ca	3.89	31.86	0.8445	39	-	0.0668853	0.0074367	0.0187453	0.00291037	0.00120444	0.0019014	0.202125	0.187781	52.3095	1.56249	0.180875	0.0835574
15	23.64	7.96	11.99	89.33	29.25	25	2.3297e-05	0.37477	0.016623			1.195	1.0104	3	2.38	0.51	51	210	51	1.98	0.77	0.75	0.7	1.43	1.73	1.01	0		1	43Ca	1	43Ca	2.15	28.73	0.8026	39	-	0.0547907	0.00672391	0.0100032	0.00280785	0.00869258	0.00188041	0	0	37.8096	1.66714	0.197961	0.0701827
16	0	0	0	0	0	2	2.3297e-05	0	0			1.1961	1.0091	2	1.92	0.41	0	0	0	0	0	0	0	0	0	0	0	0	0	0	0	0	0	0	0.8021	39	-	0	0	0	0	0	0	0	0	0	0	0	0
17	0	0	201.61	0	0	0	1.7473e-05	0.0069358	0.00036082			1.1972	1.0011	1	1.88	0.26	1	4	26	14.09	0.03	0.03	0.99	0.84	0.02	0.28	0.001964	207Pb	1	43Ca	1	43Ca	8.51	31.26	0.7725	39	-	0.0809338	0.00659977	0.218162	0.0202763	0.00236759	0.0378551	0	0	47.446	1.42717	0.236557	0.108957
18	31.9	24.15	98.74	160.15	183.41	2	1.7473e-05	0.029613	0.0013531			1.1983	1.0121	2	2.18	0.39	4	37	34	5.88	0.13	0.08	0.08	1.25	1.35	1.03	0.0047038	208Pb	1	43Ca	1	43Ca	9.03	29.61	0.8466	39	-	0.0539539	0.00678712	0.00624848	0.00401661	0.00484077	0.00456087	0	0	48.7028	2.2196	0.173004	0.11333
19	0	0	92.08	138.76	149.65	0	9.707e-06	0.027568	0.0013426			1.1993	0.9998	1	2.29	0.4	4	33	192	1.98	0.76	0.56	1.06	1.16	0.96	0.8	0		1	43Ca	1	43Ca	8.19	29.15	0.762	39	-	0.0718102	0.00687552	0.0990789	0.0118184	0.00107006	0.00217749	0.0586682	0.244618	38.0677	2.348	0.127979	0.109702
20	0	0	178.1	332.68	416.02	0	1.2134e-05	0.011326	0.00070261			1.2004	1.0087	1	2.51	0.46	1	16	124	1.65	0.72	0.85	0.95	1.1	0.92	1.05	0		1	43Ca	1	43Ca	119.35	30.38	0.8411	39	-	0.0673062	0.0081131	0.0093196	0.00272055	0.00138311	0.0027959	0	0	50.0677	1.79159	0.268402	0.061123
21	9.03	6.85	28.2	56.29	115.83	2	3.1062e-05	0.058916	0.0030499			1.2015	1.0123	1	2.04	0.39	5	38	16	1.17	0.43	0.58	0.85	2.27	1.4	0.98	0		1	43Ca	1	43Ca	63.65	35.28	0.8496	39	-	0.0732601	0.00578335	0.0122362	0.00189047	0.00730728	0.00140851	0	0	54.8404	1.96775	0.183375	0.0780842
22	12.99	6.92	14.8	91.97	39.82	7	3.8828e-05	0.11474	0.0049834			1.2026	1.0087	4	1.9	0.41	16	81	86	1.92	1.37	1.64	1.55	0.95	0.97	1.12	0		1	43Ca	1	43Ca	2.67	28.37	0.8426	39	-	0.0475159	0.00366073	0.0129995	0.0025621	0.00778167	0.00203133	0	0	43.0735	1.68277	0.207474	0.0797117
23	0	0	169.99	144.1	284.95	0	1.1648e-05	0.012369	0.00078293			1.2037	0.994	1	2.82	0.48	2	15	89	1.93	1.17	1.42	1.5	0.72	0.61	1.07	0.0016461	208Pb	1	43Ca	1	43Ca	1.69	34	0.752	39	-	0.208228	0.011103	0.213422	0.0137261	0.0137045	0.00221379	0	0	52.9559	1.43418	0.15587	0.108803
24	18.03	7.76	13.62	80.46	30.28	13	1.9414e-05	0.30684	0.014479			1.2048	1.0129	3	2.46	0.41	35	110	54	1.42	0.81	1.22	1.13	1.2	1.01	1.19	0.00034606	208Pb	1	43Ca	1	43Ca	1.68	27.11	0.8481	39	-	0.0422675	0.00473193	0.0113676	0.00300654	0	0	0	0	39.8755	1.24211	0.164563	0.0745509
25	0	0	568.77	0	0	0	9.707e-06	0.0042997	0.00031611			1.2059	0.9921	1	2.64	0.5	1	6	79	24.19	0	0	0	0	0	1.5	0.0021817	206Pb	1	43Ca	1	43Ca	1.13	30.86	0.7366	39	-	0.0448187	0.00596961	0.527126	0.0324812	0.00851236	0.00815335	0	0	46.152	1.59627	0.198997	0.0994895
26	8.73	5.99	19.05	0	0	3	2.9121e-05	0.097507	0.0043481			1.207	1.0111	3	2.42	0.3	14	59	40	29.63	0.29	0.12	0.47	2.45	1.46	0.54	0.011923	207Pb	1	43Ca	1	43Ca	1.73	25.47	0.8343	39	-	0.0714323	0.00366823	0.0219455	0.00368165	0.0282493	0.00369467	0	0	40.7437	2.12975	0.202205	0.0814203
27	0	0	0	0	0	1	1.9414e-05	0	0			1.2081	0.3627	1	2.19	0.37	0	70	44	62.11	0	0	0	0	0	0	0.0018115	206Pb	1	43Ca	2	206Pb	21.66	0	0	39	-	1.66135	2.02095	16.535	6.28011	383.703	147.733	24.3298	82.1911	6.47966	29.2582	3.5392	17.0139
28	0	0	0	0	0	3	9.707e-06	0	0			1.2092	0.274	2	2.44	0.56	0	68	125	1775.99	0	0	0	0	0	0	0.00011787	208Pb	1	43Ca	2	206Pb	53.88	9.02	0	39	-	0	0	5.92117	2.93812	285.311	125.103	6.54073	33.4372	17.7806	13.8669	2.16401	16.6893
29	17.16	8.74	17.81	78.61	46.5	8	1.1648e-05	0.33075	0.014494			1.2102	1.0144	3	2.02	0.44	44	63	39	1.76	0.18	0.07	0.07	1.53	1.46	1.22	0.0042163	207Pb	1	43Ca	1	43Ca	4.11	26.78	0.8494	39	-	0.0203339	0.00557863	0.015906	0.0028868	0.0151982	0.00407915	0	0	45.2693	1.7584	0.177158	0.0874054
M220
1	39.79	14.3	22.29	80.85	29.29	21	1.7473e-05	0.24913	0.011032			1.2277	1.0099	4	2.18	0.39	32	114	73	1.86	0.89	0.66	0.71	1.19	1.11	0.97	0		1	43Ca	1	43Ca	3.04	28.6	0.8277	39	-	0.056476	0.00667589	0.00771421	0.00415329	0.00449763	0.00197989	0	0	43.9841	1.5475	0.131965	0.101666
2	14.7	9.33	25.47	227.23	94.95	4	4.3682e-05	0.05146	0.0029517			1.2288	0.9997	4	2.6	0.62	2	33	81	0.79	0.39	1.7	1.48	1.86	1.04	0.85	1.0884	235U	1	43Ca	1	43Ca	1.86	30.58	0.8005	39	-	0.0587231	0.00723353	0.225559	0.0139658	0.00393033	0.00226475	0	0	43.098	1.05012	0.0914928	0.0818696
3	0	0	0	0	0	3	3.8828e-05	1.9317	0.38198			1.2299	0.6587	3	2.25	0.52	0	0	0	0	0	0	0	0	0	0	0.045192	206Pb	1	43Ca	2	232Th	4.47	0	0	39	-	0	0	0	0	0	0	0	0	0	0	0	0
4	23.14	15.88	50.38	148.97	99.54	3	2.0385e-05	0.052518	0.0027334			1.2309	1.0142	4	2.07	0.4	7	30	24	3.23	1.26	1.16	1.02	0.76	1.06	1.31	0.0092873	207Pb	1	43Ca	1	43Ca	3.43	32.68	0.8545	39	-	0.0300501	0.00500247	0.0226686	0.0038474	0.00823954	0.0023586	0	0	42.6707	1.65821	0.0514672	0.0662377
5	65.9	33.58	68.13	120	142.91	8	2.9121e-05	0.034312	0.0017541			1.232	1.0007	3	2.45	0.65	4	37	184	9.66	0.46	0.56	0.74	1.6	0.99	1.71	0		1	43Ca	1	43Ca	2.12	26.33	0.7375	39	-	0.0482477	0.0064003	0.158667	0.014611	0.0202881	0.0146991	0	0	39.6108	1.17328	0.284265	0.282407
6	17.83	7.68	13.47	79.42	81.23	13	4.8535e-05	0.12409	0.0059125			1.2331	1.0009	4	2.41	0.62	12	52	143	1.19	0.47	0.68	0.74	1.87	1.46	1.07	0.0006682	208Pb	1	43Ca	1	43Ca	2.6	28.14	0.7976	39	-	0.195953	0.0098696	0.0128067	0.00427641	0.00427424	0.00213842	0	0	43.9868	1.34408	0.230299	0.119084
7	23.8	14.12	34.61	82.32	94.85	5	4.8535e-05	0.035742	0.0017672			1.2342	1.0107	3	2.37	0.54	5	34	77	1.33	0.92	0.74	1.65	1.06	1.07	1.09	0		1	43Ca	1	43Ca	2	26.61	0.7988	39	-	0.0252994	0.00639561	0.0222315	0.00463399	0.000845796	0.00226825	0.0127281	0.426557	40.2898	1.2754	0.190402	0.0758031
8	36.04	15.5	27.13	148.04	125.77	13	4.8535e-05	0.061305	0.0028176			1.2353	1.0082	4	2.34	0.57	8	31	72	2.15	0.81	0.91	0.93	0.98	1.07	0.95	0.011331	207Pb	1	43Ca	1	43Ca	3.28	28.1	0.7882	39	-	0.0468717	0.00530312	0.029457	0.00364643	0.0089562	0.0050286	0	0	44.0606	1.11298	0.217287	0.0760158
9	24.76	11.35	20.91	105.15	114.74	11	3.8828e-05	0.09446	0.0051367			1.2364	1.0125	4	2.16	0.6	9	67	41	0.91	0.63	0.79	0.89	1.77	2.03	0.72	0.0082435	208Pb	1	43Ca	1	43Ca	2.23	27.96	0.8409	39	-	0.053536	0.00536983	0.00879944	0.0036654	0.00857967	0.0028362	0.0833404	0.233308	40.2415	1.70425	0.201742	0.100498
10	35.78	12.65	19.54	93.11	43.33	22	4.8535e-05	0.10451	0.0047126			1.2375	1.0137	4	2.2	0.56	14	79	41	1.72	1.11	0.91	1.44	0.81	0.63	0.58	0.00074319	208Pb	1	43Ca	1	43Ca	1.28	28.88	0.8525	39	-	0.0238395	0.00621066	0.0122512	0.00361722	0.00309179	0.00225165	0.0887306	0.17558	43.3181	1.9333	0.180598	0.081819
11	56.37	20.32	31.7	59.35	60.23	21	3.8828e-05	0.07903	0.0038784			1.2386	1.0145	4	1.84	0.3	10	33	14	1.72	0.85	0.81	0.72	1.51	1.18	0.9	0.0015149	208Pb	1	43Ca	1	43Ca	3.15	27.89	0.8468	39	-	0.0288182	0.00489886	0.01213	0.00373056	0.00406865	0.00200621	0	0	41.2612	1.4992	0.252173	0.0617484
12	19.28	11.43	28.03	128.86	51.09	5	2.9121e-05	0.073581	0.0034798			1.2397	1.014	2	1.84	0.46	10	99	15	0.71	0.89	1.19	1.08	0.91	0.93	0.64	0.0048497	207Pb	1	43Ca	1	43Ca	4.14	28.31	0.854	39	-	0.0452436	0.00519846	0.00587736	0.00165131	0.00120165	0.0024473	0.274524	0.130856	40.5782	1.26833	0.251974	0.0926876
13	36.89	14.37	23.5	97.74	72.14	17	4.8535e-05	0.078321	0.0035503			1.2407	1.012	4	2.36	0.45	10	78	19	1.91	1.2	1.37	1.38	0.71	0.68	0.89	0.00063684	206Pb	1	43Ca	1	43Ca	3.43	28.46	0.8396	39	-	0.0514588	0.00550136	0.0124245	0.00376838	0.00388365	0.00213682	0.196017	0.251968	46.7601	0.940503	0.266267	0.114851
14	20.78	6.62	9.71	88.15	61.4	29	4.3682e-05	0.26382	0.012059			1.2418	1.0134	4	2.28	0.47	21	77	18	0.71	0.86	1.36	0.82	1.39	1.51	1.09	0.0048832	208Pb	1	43Ca	1	43Ca	1.72	29.39	0.8578	39	-	0.0440824	0.0039906	0.0120562	0.00360542	0.00914759	0.00253287	0	0	43.4218	1.00083	0.229513	0.0749373
15	53.8	34.11	92.55	299.52	308.63	4	3.3975e-05	0.018027	0.0010913			1.2429	1.014	3	2.2	0.38	2	13	15	1.93	0.96	0.68	0.73	1.25	1.25	1.19	0		1	43Ca	1	43Ca	0.89	30.68	0.8554	39	-	0.035941	0.00495703	0.0139755	0.00423108	0.00318057	0.00154981	0.0663464	0.162665	47.0894	0.918235	0.111895	0.0850919
16	7.67	4.86	13.27	117.2	72.69	4	4.8535e-05	0.088839	0.0043087			1.244	1.0152	3	2.13	0.4	9	10	28	1.12	2.05	1.11	1.65	0.93	0.81	1.25	0.010473	206Pb	1	43Ca	1	43Ca	1.57	30.01	0.8477	39	-	0.0125186	0.00488083	0.00311957	0.00333878	0.00387323	0.00145518	0	0	47.5524	1.57429	0.16266	0.115845
17	53.41	24.42	44.83	89.98	93.9	11	3.8828e-05	0.043698	0.0022794			1.2451	1.0057	4	2.39	0.4	5	72	133	1.76	0.98	0.95	0.82	1.03	1.02	1.16	0.017676	207Pb	1	43Ca	1	43Ca	1.84	28.19	0.8312	39	-	0.119213	0.00710883	0.0187337	0.00367396	0.00114426	0.00184376	0.220799	0.272546	44.8787	0.946148	0.194539	0.0919367
18	11.73	8.89	36.58	149.54	203.37	2	4.8535e-05	0.029042	0.0015026			1.2462	1.0102	1	1.91	0.46	4	26	55	1.77	1.19	0.81	1.03	1.07	1	1.04	0.00099103	208Pb	1	43Ca	1	43Ca	1.84	25.92	0.8473	39	-	0.0668635	0.00616413	0.0223634	0.00756642	0.00225152	0.00211491	0	0	40.4246	1.29996	0.0529995	0.115983
19	9.65	6.62	21.07	139.28	111.61	3	3.8828e-05	0.066215	0.0033892			1.2473	1.0106	2	1.64	0.41	7	35	124	1.2	0.69	0.76	0.67	1.42	1.64	1.74	0.0051285	208Pb	1	43Ca	1	43Ca	2.49	26.34	0.8578	39	-	0.0365514	0.00669059	0.00714336	0.0021216	0.00138743	0.00159606	0.216311	0.206912	40.5073	0.896331	0.169978	0.147809
20	24.12	12.89	27.61	145.33	170.8	7	4.8535e-05	0.049369	0.0027764			1.2484	1.0079	3	2.1	0.44	3	23	80	1.09	0.72	0.67	0.86	2.01	1.81	1.03	0.00354	208Pb	1	43Ca	1	43Ca	2.85	30.8	0.8037	39	-	0.0174289	0.00489291	0.0525519	0.0049677	0.00433336	0.00179949	0.243992	0.14184	46.2584	1.33991	0.178607	0.0875469
21	11.66	6.22	13.32	87.52	41.95	7	3.1062e-05	0.15971	0.0077931			1.2672	1.01	3	2.05	0.25	17	51	143	1.5	0.98	1.15	1.07	0.96	1.07	0.81	0.0037135	207Pb	1	43Ca	1	43Ca	2.17	29.15	0.8408	39	-	0.0108884	0.00541523	0.0259491	0.0057299	0.12072	0.00876286	0	0	47.7501	1.89102	0.177686	0.0845836
22	0	0	0	0	0	0	3.1062e-05	0	0			1.2683	1.0087	1	2.27	0.59	0	0	0	0	0	0	0	0	0	0	0	0	0	0	0	0	0	0	0.8426	39	-	0	0	0	0	0	0	0	0	0	0	0	0
23	48.89	30.96	83.9	196.3	295.82	4	4.8535e-05	0.013894	0.00070747			1.2695	1.0046	2	2.51	0.58	2	6	52	2.1	1.31	0.82	0.78	0.95	1.3	0.78	0.014208	206Pb	1	43Ca	1	43Ca	1.52	27.97	0.8127	39	-	0.0870264	0.0065967	0.163601	0.0128699	0.000916484	0.00134834	0	0	47.0004	1.9341	0.172094	0.0707012
24	38.48	18.19	34.4	103.3	75.87	10	2.9121e-05	0.073603	0.0036948			1.2707	1.0105	4	1.98	0.42	10	75	56	1.78	0.99	1.05	0.86	0.97	1.1	1.18	0		1	43Ca	1	43Ca	1.91	25.39	0.8402	39	-	0.0737163	0.00831614	0.00927051	0.00391104	0	0	0.11209	0.417612	37.3608	1.10479	0.256624	0.100726
25	82.07	46.38	105.8	211.4	353.31	6	4.8535e-05	0.012382	0.0011034			1.2719	1.0089	2	2.12	0.3	1	9	80	1.27	0.7	0.78	0.75	1.27	1.39	0.89	0		1	43Ca	1	43Ca	1	27.78	0.8458	39	-	0.0900886	0.00642292	0.0293716	0.00542372	0.00109222	0.00189974	0	0	46.7722	1.72336	0.210778	0.134162
26	35.47	18.94	40.49	109.31	160.63	7	4.8535e-05	0.033541	0.0018436			1.2731	1.0031	3	2.69	0.81	3	20	92	1.2	0.7	0.58	0.86	1.49	1.46	1	0.006048	208Pb	1	43Ca	1	43Ca	1.11	28.88	0.77	39	-	0.0530755	0.00845379	0.171437	0.0165046	0.0291094	0.00224584	0.307779	0.194775	50.306	1.87073	0.188807	0.0634055
27	26.58	8.04	11.52	93.65	41.61	33	4.8535e-05	0.21118	0.0094217			1.2742	1.0089	4	1.97	0.32	17	107	161	1.21	0.99	0.83	0.96	1.08	1.18	1.12	0		1	43Ca	1	43Ca	2.27	29.23	0.8568	39	-	0.00550424	0.00719355	0.0072538	0.00321696	0.00134701	0.00188403	0.321085	0.575807	45.5127	1.04171	0.203135	0.119659
28	20.87	18.05	132.19	0	0	1	2.0385e-05	0.019411	0.00094118			1.2754	1.0056	1	2.24	0.31	3	40	107	29.31	0	0	0.25	0	1.91	1.78	0		1	43Ca	1	43Ca	1.23	26.42	0.8351	39	-	0.0160299	0.00358994	0.137589	0.00682814	0.0188758	0.0286414	0.348765	0.169453	41.9701	0.952931	0.168372	0.0785514
29	0	0	0	0	0	0	4.8535e-05	0	0			1.2766	1.0157	1	2.3	0.63	0	1	36	1.71	0	0	10.04	0	0.11	1.2	0.027264	206Pb	1	43Ca	1	43Ca	0.71	27.18	0.863	39	-	0.0120434	0.0046241	0	0	0.00068144	0.00222528	0.163301	0.297259	50.4253	1.48863	0.245742	0.0966053
30	15.47	11.75	48.64	150.69	222	2	4.8535e-05	0.022013	0.0019383			1.2778	1.0032	3	2.46	0.72	2	10	89	1.3	0.83	1.15	1.32	1.37	1.02	1.47	0.0062945	206Pb	1	43Ca	1	43Ca	1.05	30.03	0.7923	39	-	0.0668716	0.00702063	0.214899	0.0146065	0.00351384	0.00227567	0	0	45.2453	1.61256	0.165493	0.0576306
31	22.63	12.68	28.78	175.5	171.94	6	4.8535e-05	0.045122	0.0021662			1.2789	1.0137	4	2.36	0.42	5	39	81	1.12	0.72	0.91	0.64	2.23	2.51	1.2	0.0083196	208Pb	1	43Ca	1	43Ca	2.93	26.59	0.8536	39	-	0.0443467	0.00593483	0.0042789	0.00222168	0	0	0	0	44.3571	1.73634	0.160135	0.0924021
32	27.59	14.07	28.66	102.4	74.7	8	2.9121e-05	0.082183	0.0039709			1.2801	1.0141	3	1.85	0.36	10	28	11	1.91	1.27	1.77	0.49	0.57	1.9	1.66	0		1	43Ca	1	43Ca	7.82	27.01	0.8475	39	-	0.0333648	0.00577408	0.0108117	0.00446182	0.000180301	0.00163089	0	0	45.7546	1.47507	0.124418	0.106682
33	14.72	6.34	11.13	93.87	43.98	13	3.1062e-05	0.23489	0.01111			1.2813	1.0127	4	2.17	0.41	24	93	37	1.42	0.44	0.35	0.39	1.49	1.86	1.13	0.010242	207Pb	1	43Ca	1	43Ca	3.27	30.88	0.8479	39	-	0.0677706	0.00959189	0.0112458	0.0045853	0	0	0.259977	0.125692	49.1669	1.73207	0.231462	0.0704291
34	18.18	9.69	20.72	82.95	37.89	7	1.7473e-05	0.18207	0.0084189			1.2825	1.0107	4	2.28	0.26	20	125	61	1.49	1.09	1.5	1.76	0.76	0.48	0.78	0.0023933	206Pb	1	43Ca	1	43Ca	1.96	28.45	0.8569	39	-	0.021885	0.00457119	0.00966846	0.00264535	0	0	0.27822	0.39146	43.7309	1.43465	0.190096	0.0774418
35	0	0	101.22	87.77	405.63	0	2.4268e-05	0.010024	0.00065171			1.2837	1.0107	1	2.09	0.38	1	6	30	1.28	0.76	1.14	1.06	1.32	1.45	1.09	0.0064853	208Pb	1	43Ca	1	43Ca	1.29	31.44	0.8402	39	-	0.0571897	0.00822786	0.042747	0.00661425	0.0026981	0.00177283	0.130906	0.342757	49.6467	2.33467	0.229191	0.15037
36	24.26	16.65	52.83	211.01	246.91	3	4.8535e-05	0.021042	0.001158			1.2848	1.0125	2	2.02	0.32	3	22	21	1.89	1.22	0.96	0.82	0.76	0.88	1.07	0.00026267	208Pb	1	43Ca	1	43Ca	2.09	27.1	0.8566	39	-	0.0659003	0.00726435	0.00637933	0.00284367	0	0	0.0551731	0.180508	36.7301	1.64006	0.227647	0.0746916
37	39.98	25.36	69	93.63	183.37	4	4.8535e-05	0.016999	0.0010417			1.286	0.9977	4	3.38	0.8	2	14	60	2.01	1.27	1.6	0.98	0.83	1.08	1.1	0.0014995	208Pb	1	43Ca	1	43Ca	1.59	27.91	0.7003	39	-	0.0715757	0.00681383	0.318724	0.0204688	0.00240354	0.00226838	0	0	42.1734	1.6549	0.0914632	0.0564571
38	23.11	17.51	71.81	138.65	157.42	2	2.9121e-05	0.024542	0.0012632			1.2872	0.9955	2	1.84	0.35	3	20	107	2.1	0.73	0.54	0.89	0.98	0.99	0.83	0.01846	206Pb	1	43Ca	1	43Ca	1.16	29.29	0.7352	39	-	0.0476409	0.00529746	0.359314	0.0190076	0.00424906	0.000855281	0.0912124	0.287007	48.7702	1.41327	0.200464	0.0847113
39	0	0	0	136.41	205.13	3	3.3975e-05	0.045082	0.0024347			1.2884	0.9903	3	2.21	0.47	4	33	167	8.11	0.07	0.07	0.58	13.76	1.54	2.43	0.019069	206Pb	1	43Ca	1	43Ca	1.48	20.32	0.6801	39	-	0.0440922	0.00947021	0.456328	0.0240244	1.46282	0.0375009	0	0	27.5809	0.725975	0.230339	0.102182
40	22.79	7.46	11.08	99.55	32.73	27	3.8828e-05	0.25192	0.011426			1.2896	1.0127	4	2.16	0.41	24	129	30	1.59	0.55	0.77	0.77	1.5	1.28	1.24	0.0031706	207Pb	1	43Ca	1	43Ca	1.94	29.08	0.8368	39	-	0.0770654	0.0104918	0.00925116	0.00407368	0.0026613	0.00165897	0	0	43.0914	1.25177	0.0381913	0.0987407
M221		M221
1	37.75	32.74	241.69	0	0	1	1.2134e-05	0.018006	0.0025681			1.1318	0.9981	1	1.81	0.36	3	24	31	345.04	0	0	0	0	0	0	0.017135	208Pb	1	43Ca	1	43Ca	5.15	1.32	0.6023	39	-	0.190577	0.040168	0.195012	0.0306428	4.28199	0.446837	0.0574125	2.4899	1.2947	0.713785	1.28579	0.829167
2	56.91	27.14	51.68	0	0	11	2.4268e-05	0.065604	0.0078919			1.1334	1.0061	3	2.19	0.41	14	198	18	61.93	0	0	0	0	0	0	0.00596	207Pb	1	43Ca	1	43Ca	2.43	2.64	0.8657	39	-	0.0386078	0.244647	0	0	71.8661	7.995	0	0	15.6015	4.48882	0	0
3	4.91	3.19	9.09	0	0	4	3.3975e-05	0.19838	0.031099			1.1349	1.0171	3	2.39	0.43	4	22	0	317.45	0	0	0	0	0	0	0		1	43Ca	2	43Ca	56.19	8.62	0.9532	39	-	0	0	0	0	0.660709	0.254111	0	0	8.64237	6.26514	9.269	4.21269
4	214.73	164.39	665.65	0	0	2	1.5531e-05	0.0048789	0.00091342			1.1365	0.9681	2	1.64	0.27	1	875	39	23.49	0	0	0	0	0	0	0.0035567	208Pb	1	43Ca	1	43Ca	8.4	4.27	0	39	-	0.167126	0.23819	0.190372	0.026943	12.3401	0.919253	0	0	5.22349	2.27385	3.56554	3.82138
5	9.23	6.56	22.6	0	0	3	1.9414e-05	0.1384	0.031114			1.1381	0.9861	2	1.75	0.38	22	2637	115	20.26	0	0	0	0	0	0	0.0080475	208Pb	1	43Ca	1	43Ca	2.68	19.85	0.7039	39	-	0	0	0	0	1.05834	0.228994	0	0	23.6045	5.21161	3.98274	8.67162
6	0	0	0	0	0	0	1.5531e-05	0	0			1.1396	0.3291	1	1.6	0.21	0	54	38	1128.15	0	0	0	0	0	0	0.016369	207Pb	1	43Ca	1	43Ca	7.92	11.92	0	39	-	0.29184	0.156759	0.314845	0.0223793	4.8808	0.368056	0	0	11.2764	2.15037	1.52427	2.10052
7	12.02	5.89	11.53	91.12	26.92	9	1.5531e-05	0.39829	0.017691			1.1412	1.012	4	2.11	0.35	73	121	112	1.86	0.93	0.9	0.95	1.28	1.36	1.15	0.0039846	206Pb	1	43Ca	1	43Ca	2.38	28.86	0.8334	39	-	0.0118692	0.00408568	0.0191664	0.00419362	0.00202238	0.00196497	0.039476	0.273264	29.0821	6.15611	0.291483	0.106451
8	880.38	760.09	4014.66	0	0	1	1.359e-05	0.00064531	0.00014499			1.1428	0.9841	1	1.73	0.4	0	58	55	1619.38	0	0	0	0	0	0	0.052842	232Th	1	43Ca	1	43Ca	3.46	0.97	0.3439	39	-	0.158131	0.0599926	0.393054	0.0461248	2.93045	0.491782	0.620182	1.97357	0.637671	0.567239	0.177788	1.31249
9	39.07	33.86	249.29	0	0	1	7.7656e-06	0.027187	0.0036627			1.1443	0.9389	1	1.58	0.42	7	72	124	385.71	0	0	0	0	0	0	0.0032226	207Pb	1	43Ca	1	43Ca	10.27	7.21	0	39	-	0.812344	0.109895	0.529332	0.0378742	15.9087	1.42354	0	0	9.78952	1.05632	0.537116	1.63839
10	22.66	14.36	39.07	31.78	35.9	4	1.5531e-05	0.093845	0.0044759			1.1459	1.0104	2	2.32	0.36	17	25	81	1.07	1.45	2.53	1.52	0.79	0.8	1	0.0054168	208Pb	1	43Ca	1	43Ca	0.91	24.67	0.8175	39	-	0.052282	0.00498983	0.00989121	0.00308533	0.00119056	0.00264338	0.19687	0.199179	37.1284	2.3468	0.22204	0.167732
11	0	0	0	0	0	1	1.7473e-05	0	0			1.1475	1.0145	2	2.36	0.38	0	0	0	0	0	0	0	0	0	0	0	0	0	0	0	0	0	0	0.8468	39	-	0	0	0	0	0	0	0	0	0	0	0	0
12	1102.6	984.47	5719.72	0	0	3	1.5531e-05	0.0013288	0.0039845			1.1491	0.9902	2	1.9	0.35	0	2	0	0	0	0	0	0	0	0	0.017699	206Pb	1	43Ca	2	232Th	5.46	4.33	0.6068	39	-	0.439749	0.142886	0.226507	0.0279816	1200.91	151.413	4.49688	4.26049	6.70495	0.989896	1.44149	2.79306
13	16.72	8.91	19.05	51.07	52.06	7	2.4268e-05	0.14252	0.0063783			1.1506	1.0073	3	1.87	0.25	19	156	158	1.55	1.09	1.04	1.33	1.51	1.63	1	0.002024	208Pb	1	43Ca	1	43Ca	6.27	28.79	0.8379	39	-	0.0402651	0.00620063	0.00876019	0.00340633	0.00267591	0.00139421	0.0840447	0.233085	36.0839	2.70645	0.18415	0.120105
14	0	0	0	0	0	3	9.707e-06	0.0063688	0.0029793			1.1522	0.5657	2	1.91	0.35	1	58	37	30.81	0	0	0	0	0	0	0.019341	206Pb	1	43Ca	1	43Ca	30.06	4.23	0	39	-	0.521564	0.665041	15.5315	2.12053	148.49	18.2635	7.16019	44.6014	8.22953	8.88321	6.47213	13.5287
15	34.69	26.4	109.47	0	0	2	1.4561e-05	0.032667	0.0037281			1.1538	0.9821	2	2.05	0.33	9	108	47	1187.26	0	0	0	0	0	0	0		1	43Ca	1	43Ca	768.51	5.47	0.7226	39	-	0.17228	0.0290234	0.152	0.0118338	6.04599	0.382175	0.302061	0.654376	7.08714	1.06287	0.108385	0.669119
16	22.03	13.96	37.99	44.52	52.74	4	1.2134e-05	0.12356	0.0058735			1.1553	1.0057	3	2.24	0.43	24	116	163	1.95	2.78	2.68	4.01	0.43	0.28	0.5	0.0012287	208Pb	1	43Ca	1	43Ca	14.11	24.19	0.8412	39	-	0.0215585	0.00592586	0.0131652	0.00249984	0.00260396	0.00254319	0	0	37.8655	1.9316	0.239638	0.0747765
17	0	0	977.81	0	0	0	8.7363e-06	0.0026905	0.00059031			1.1569	1.0039	1	2.66	0.53	1	61	52	141.49	0	0	0	0	0	0	0.015384	208Pb	1	43Ca	1	43Ca	5.79	6.05	0.7317	39	-	0.16969	0.063473	0	0	11.214	0.517051	0	0	12.7372	1.34827	2.46665	1.57929
18	0	0	142.63	0	0	0	9.707e-06	0.017728	0.0018048			1.1585	0.9757	1	1.91	0.35	5	138	36	307.77	0	0	0	0	0	0	0.034356	207Pb	1	43Ca	2	206Pb	1.39	9.81	0.5217	39	-	0	0	1.11138	0.130236	27.1265	3.16906	0	0	9.72075	1.88872	0	0
19	76.37	56.06	207.45	0	0	3	1.9414e-05	0.016641	0.0054664			1.16	1.0078	2	1.76	0.4	2	328	35	47.7	0	0	0	0	0	0	0.001402	207Pb	1	43Ca	1	43Ca	9.92	6.91	0.6248	39	-	0.0496708	0.0766174	0.0788498	0.0176125	0.78132	0.18157	1.384	3.74337	9.5503	2.03747	1.94534	1.18289
20	36.11	27.35	111.74	100.65	107.77	2	1.7473e-05	0.026152	0.0013484			1.1616	1.0116	3	2.01	0.49	5	22	51	1.53	0.96	2.67	1.17	0.77	0.88	1.07	0.021082	207Pb	1	43Ca	1	43Ca	1.45	22.62	0.8449	39	-	0.0486644	0.00466798	0.0171827	0.00439053	0.00272654	0.00170885	0.0085686	0.298911	28.8044	1.62231	0.186877	0.101013
21	122.06	72.64	176.97	0	0	5	1.9414e-05	0.017291	0.0014116			1.1867	0.9629	4	2.11	0.48	4	36	32	0	0	0	0	0	0	0	0.0025758	208Pb	1	43Ca	2	207Pb	9.67	13.88	0	39	-	0.283934	0.113607	0.59383	0.0460363	15.5537	2.46035	7.23877	4.34582	14.2013	1.65923	1.66475	1.98151
22	13.95	5.69	9.62	32.37	16.64	15	1.7473e-05	0.50866	0.022768			1.1883	1.0098	4	2.15	0.46	79	290	160	6.14	0.43	0.34	0.41	1.73	1.8	1.6	0.0047366	208Pb	1	43Ca	1	43Ca	7.47	27.01	0.8593	39	-	0.018476	0.0041742	0.00106044	0.00202862	0	0	0.0678683	0.161736	40.8154	3.59047	0.182434	0.0685575
23	27.51	17.43	47.43	13.59	60.11	4	1.9414e-05	0.061831	0.003183			1.1898	1.0101	4	2.14	0.35	9	78	117	1.01	1.87	3.06	2.52	0.67	0.57	0.99	0.0039031	207Pb	1	43Ca	1	43Ca	4.97	25.68	0.852	39	-	0.0214483	0.00493162	0.0235618	0.00560555	0.00018575	0.0012654	0	0	37.9269	2.09036	0.217354	0.0966529
24	10.96	9.48	69.8	81.24	111.56	1	1.4561e-05	0.051785	0.0024174			1.1914	1.0123	1	1.82	0.23	8	58	35	3.81	0.3	0.43	0.54	3.74	2.02	0.9	0.0035298	208Pb	1	43Ca	1	43Ca	4.54	18.54	0.8228	39	-	0.0478403	0.00449603	0.00532519	0.00330901	0.0481466	0.00783479	0.0900922	0.231716	23.415	0.462542	0.259554	0.112901
25	0	0	41.49	0	0	0	2.4268e-05	0.02457	0.0046559			1.193	0.9979	1	2.51	0.47	5	370	161	22.09	0	0	0	0	0	0	0		1	43Ca	2	207Pb	4.66	8.22	0.5421	39	-	0.297875	0.149452	0	0	4.78052	0.40878	0	0	12.6068	2.53231	0	0
26	15.51	11.82	49.6	0	0	2	1.1648e-05	0.091494	0.011968			1.1945	0.9236	2	2.64	0.57	22	810	415	52.77	0	0	0	0	0	0	0.0085074	206Pb	1	43Ca	1	43Ca	8.66	4.32	0	39	-	0.4915	0.16332	0.734855	0.175578	17.732	3.34763	3.31406	7.39609	10.7808	3.8257	0	0
27	154.23	88.9	206.53	0	0	6	1.9414e-05	0.01638	0.0023445			1.1961	0.9802	4	2.27	0.63	5	459	48	30.42	0	0	0	0	0	0	0.013827	207Pb	1	43Ca	2	207Pb	8.18	0.75	0	39	-	0.238867	0.210716	0.147293	0.0198703	12.171	1.33027	0	0	5.52696	3.05359	3.42007	3.87485
28	31.11	27.09	206.21	0	0	1	7.7656e-06	0.034165	0.0075121			1.1977	0.99	1	1.92	0.33	2	108	176	826.3	0	0	0	0	0	0	0.0030448	206Pb	1	43Ca	1	43Ca	18.63	24.18	0.3923	39	-	0.257105	0.0716006	0.13571	0.019199	10.7022	1.11851	5.47629	4.84126	31.1458	4.76528	2.31937	2.84381
29	7.11	6.16	46.1	0	0	1	1.9414e-05	0.059884	0.0075456			1.1992	0.9703	2	1.97	0.34	7	246	608	0	0	0	0	0	0	0	0.01737	207Pb	1	43Ca	1	43Ca	4.98	17.13	0.5969	39	-	0.106069	0.19633	0.294674	0.0182117	753.549	97.0192	0	0	19.3562	2.30325	1.80038	4.27027
30	8.4	7.26	53.55	125.15	103.13	1	1.7473e-05	0.056359	0.0028027			1.2008	1.0061	1	1.6	0.24	9	116	268	1.66	0.31	0.33	0.24	3.52	4.65	1.4	0.002658	206Pb	1	43Ca	1	43Ca	4.69	28.8	0.8545	39	-	0.0293805	0.00319803	0.00168004	0.00265083	0.00530292	0.00583771	0	0	41.141	1.26989	0.112815	0.0981325
31	21.1	13.37	36.39	126.5	164.09	4	3.8828e-05	0.040331	0.0019476			1.2024	1.0034	4	1.81	0.41	5	32	125	1.42	0.58	0.65	0.94	1.83	1.27	1.12	0.0014175	208Pb	1	43Ca	1	43Ca	3	31.55	0.845	39	-	0.127183	0.01006	0.0103814	0.00227903	0.00147876	0.00160474	0.123827	0.214849	54.0119	2.18196	0.185395	0.140754
32	34.86	22.64	64.24	0	0	4	1.4561e-05	0.06502	0.01033			1.2039	1.0016	2	1.98	0.37	15	334	102	42.67	0	0	0	0	0	0	0.017731	208Pb	1	43Ca	2	238U	2.3	6.44	0.4348	39	-	0.164297	0.0650367	0	0	4.82289	0.718849	4.07783	6.23916	7.61595	1.77571	1.1145	2.51009
33	12.09	10.46	76.95	52.06	79.34	1	1.1648e-05	0.058683	0.0028268			1.2055	1.0126	1	1.81	0.57	9	27	38	1.52	1.26	1.21	0.98	1.22	1.14	1.13	0.0019071	208Pb	1	43Ca	1	43Ca	2.45	25.8	0.8506	39	-	0.0239307	0.00560571	0.0139086	0.0030478	0.00919157	0.00379556	0.144673	0.102732	43.088	1.44513	0.201719	0.0685533
34	13.63	9.35	29.69	53.16	64.21	3	1.7473e-05	0.10413	0.004857			1.2071	1.009	2	2.06	0.37	16	23	89	1.86	0.92	1.06	0.47	0.83	1.77	1.03	0.0019955	206Pb	1	43Ca	1	43Ca	4.84	25.13	0.8344	39	-	0.12379	0.00851082	0.00639513	0.00432207	0.00705158	0.00252911	0.00669147	0.205281	39.5982	1.85321	0.251891	0.0738771
35	54.75	25.48	47.5	0	0	18	1.7473e-05	0.155	0.03209			1.2087	0.8832	4	1.77	0.35	2	6	1	75.11	0	0	0	0	0	0	0		1	43Ca	2	238U	4.15	527.85	0	39	-	0.13389	0.130165	0.074746	0.0125784	7.67963	1.10673	0.397694	8.03589	869.714	135.383	3.33467	4.65809
36	72.14	43.28	107.3	0	0	6	2.9121e-05	0.023494	0.0049531			1.2102	0.9899	3	2.22	0.35	3	41	153	168.16	0	0	0	0	0	0	0.010079	206Pb	1	43Ca	2	43Ca	28.2	3.15	0.3764	39	-	0.197524	0.0643533	0.240552	0.0277283	6.90854	1.88899	0.861357	3.87548	4.3241	1.07628	0.704732	1.0886
37	16.62	9.86	24.19	42.84	55.32	5	2.0385e-05	0.1219	0.0057975			1.2118	1.0021	3	1.82	0.38	17	5	373	1.19	1.79	1.88	0.61	1.34	3.08	1.46	0.0016487	208Pb	1	43Ca	1	43Ca	32.86	25.1	0.8511	39	-	0.0727906	0.00561984	0.0147771	0.0031993	0.00534635	0.0054085	0.078251	0.122302	46.7529	1.13225	0.207278	0.102682
38	0.43	0.3	0.98	0	0	3	2.9121e-05	1.983	0.26021			1.2134	0.9785	3	2.31	0.35	57	376	241	109.82	0	0	0	0	0	0	0.0062051	208Pb	1	43Ca	1	43Ca	21.91	9.03	0.877	39	-	0.834318	0.176124	0.0195656	0.0128986	2.21922	0.510987	0	0	12.4165	5.55621	0.520021	7.59658
39	24.57	21.55	173.45	0	0	1	1.9414e-05	0.017313	0.005549			1.2149	0.9846	1	2.07	0.5	4	16	0	24.87	1.16	13.55	0	0.09	0	0	0.035578	208Pb	1	43Ca	1	43Ca	5.38	21.65	0.8037	39	-	0.408287	0.438381	0	0	3.5188	0.715169	0	0	30.7254	10.4096	0	0
40	18.3	6.84	10.92	24.77	12.54	19	2.3297e-05	0.36823	0.016508			1.2165	1.0111	4	2.06	0.49	50	340	57	2.08	0.69	0.7	0.66	0.8	0.76	0.55	0.0039974	207Pb	1	43Ca	1	43Ca	4.8	29.15	0.8306	39	-	0.0151737	0.00275491	0.043312	0.00398167	0.027082	0.00622376	0.103877	0.21764	51.8066	1.305	0.222274	0.0850455
41	6.6	3.46	7.26	0	0	10	4.3682e-05	0.28701	0.055725			1.2181	0.9393	4	2.2	0.39	36	3562	179	34.66	0	0	0	0	0	0	0.039923	206Pb	1	43Ca	1	43Ca	2	14.17	0.8997	39	-	1.04564	0.951331	0	0	11.6364	2.56311	0	0	25.9974	8.89193	3.19524	8.28157
Analysis No.	NS	Area (cm^2)	RhoS	Uunk	Age (Ma)	Err Age (Ma)	D-par	Err-U concentration			La139	Ce140	Pr141	Nd146	Sm147	Eu153	Gd157	Tb159	Dy163	Ho165	Er166	Tm169	Yb172	Lu175	Pb206	Th232
M02
1	3	1.1985e-05	250313	1.96	247.917	143.269	2.35	0.03528			262.21	732.12	106.01	475.55	91.38	10.71	89.25	12.43	68.01	12.64	35.44	4.23	23.9	3.27	4.92	11.39
2	4	1.1985e-05	333751	9.72	67.5979	33.8412	2.89	0.17496			1244.05	2388.34	230.44	734.81	96.12	20.18	101.58	11.24	76.56	17.51	57.7	9.6	74.25	14.77	5.85	135.86
3	5	1.1985e-05	417188	50.23	16.4162	7.353	2.66	0.90414			601.04	1062.49	122.11	373.18	57.72	8.48	47.42	7.13	37.55	10.15	29.45	5.18	34.16	7.1	5.68	62.37
4	2	1.1985e-05	166875	24.74	13.3352	9.4353	2.36	0.44532			31.65	113.13	15.53	83.13	33.21	8.21	31.66	3.96	23.91	3.74	8.86	0.68	3.35	1.13	-1.09	26.06
5	1	1.1985e-05	83437.6	2.8	58.7059	58.7242	2.56	0.0504			271.28	732.55	95.05	445.57	74.67	11.71	61.15	8.86	38.95	6.5	14.63	1.67	12.83	1.58	7.49	31.15
6	2	1.1985e-05	166875	39.24	8.41078	5.95103	2.44	0.70632			996.45	2528.59	377.69	1476.97	276.41	17.52	241.76	31.77	195.43	41.3	118.29	18.48	130.26	19.5	2.42	47.87
7	4	1.1985e-05	333751	18.54	35.5281	17.7862	2.56	0.33372			857.6	2388.21	355.15	1488.96	265.77	25.21	273.91	33.04	237.93	44.35	124.31	18.21	130.21	21.81	-0.93	47.33
8	5	1.1985e-05	417188	24.84	33.1528	14.8495	2.05	0.44712			496.63	1461.36	236.96	1159.93	263.08	26.89	305.29	33.9	204.54	39.13	87.69	9.91	60.39	8.32	6.27	73.47
9	2	1.1985e-05	166875	24.43	13.5042	9.5549	2.19	0.43974			1609.47	4581.02	641.34	2579.13	424.04	59.8	330.01	36.55	193.06	34.38	90.57	13.43	89.69	12.95	21.81	372.04
10	3	1.1985e-05	250313	23.79	20.7895	12.0141	2.91	0.42822			159.45	182.65	182.52	192.04	159.2	168.1	201.82	169.49	171.93	174.86	181.66	180.55	231.07	182.34	176.47	193.04
M07
1	6	1.1985e-05	500626	12.48	78.9032	32.2724	1.72	0.22464			794.95	1978.62	224.81	871.85	139.91	20.68	95.94	9.96	46.23	8.45	25.43	2.94	19.47	2.6	7.21	62.47
2	2	1.1985e-05	166875	12	27.4626	19.4311	3.08	0.216			1007.85	2016.45	198.83	716.74	102.16	22.03	82.92	10.36	56.94	11.37	31.99	4.59	31.32	4.57	14.51	104.61
3	3	1.1985e-05	250313	15.15	32.6158	18.8484	2.87	0.2727			398.71	1249.46	199.33	1083.02	384.58	78.61	472.31	79.25	488.28	104.41	304.4	41.2	283.59	49.8	10.26	102.34
4	2	1.1985e-05	166875	27.3	12.0859	8.55136	3.05	0.4914			1974.91	3288.33	270.86	857.53	103.86	17.88	69.61	7.26	40.66	8.78	22.47	3.14	23.69	4.23	-5.94	126.2
5	2	1.1985e-05	166875	23.79	13.8671	9.81168	2.87	0.42822			2853.54	5335.75	525.18	1926.8	321.32	44.55	252.16	28.98	147.93	25.84	59.79	6.65	36.44	5.53	9.37	129.76
6	1	1.1985e-05	83437.6	22.39	7.37083	7.37313	2.61	0.40302			2187.01	2906.72	208.68	694.84	93.74	16.01	81.58	7.58	41.77	7.38	20.6	2.12	19.24	3.69	11.14	94.23
7	1	1.1985e-05	83437.6	43.87	3.76291	3.76409	2.33	0.78966			590.35	1896.13	282.04	1332.6	347.11	13.73	327.04	45.3	242.21	43.88	103.59	11.9	60.55	7.78	17.17	14.47
8	6	1.1985e-05	500626	32.14	30.753	12.5784	2.41	0.57852			609.17	1441.12	167.49	649.4	135.24	16.7	125.22	15.21	98.68	21.77	56.77	9.06	60.85	10.93	21.08	95.53
9	1	1.1985e-05	83437.6	31.84	5.18407	5.18569	2.19	0.57312			176.4	628.5	106.06	663.6	198.79	55.97	193.1	29.2	158.35	30.73	81.5	11.32	75.57	11.99	44.32	2.64
10	3	1.1985e-05	250313	14.61	33.8182	19.5432	2.72	0.26298			344.8	773.87	101.49	574.97	134.48	18.76	111.48	9.83	55.75	7.48	22.77	-4.11	-20.3	-4.71	51.13	91.34
11	2	1.1985e-05	166875	4.36	75.3048	53.2818	2.19	0.07848			8.64	5.65	12.03	****	101.1	****	****	4.5	****	30.39	31.72	****	76.17	14.97	34.06	****
12	2	1.1985e-05	166875	5.2	63.1996	44.7168	3.83	0.0936			12.75	26.35	-****	205.23	-****	45.66	-****	34.73	****	-****	****	70.07	97.01	-****	-****	50.51
M08
1	7	1.1985e-05	584063	54.78	21.0661	7.97965	2.88	0.98604			53.14	60.44	49.91	45.76	49.76	53.96	53.18	53.63	62.23	53.09	48.48	49.04	64.87	53.76	54.54	48.28
2	9	1.1985e-05	750939	24.68	59.937	20.0351	2.02	0.44424			1831.63	2237.48	192.87	620.57	97.36	7.36	80.71	10.35	57.98	11.87	31.15	4.17	30.23	5.76	-4.57	31.2
3	2	1.1985e-05	166875	13.89	23.7327	16.792	2.55	0.25002			1513.37	2139.67	213.67	851.29	152.42	7.48	135.37	17.68	90.78	17.94	47.06	6.27	40.2	6.26	-4.28	23.45
4	3	1.1985e-05	250313	34.11	14.5067	8.38331	3.1	0.61398			327.42	533.26	58.82	266.35	50.81	4.37	54.44	7.22	35.76	8.27	20.33	2.19	20.15	2.91	8.23	44.13
5	21	1.1985e-05	1.75219e+06	90.59	38.1655	8.38288	2.71	1.63062			1045.36	1598.37	166.4	649.57	102.04	20.91	99.48	12.72	74.6	15.57	39.37	6.06	39.71	7.41	8.81	113.15
6	23	1.1985e-05	1.91907e+06	105.83	35.7875	7.51566	3.22	1.90494			566.28	1294.72	163.08	673.78	114.85	23.34	97.11	14.15	74.81	14.27	39.36	5.45	38.63	5.8	9.03	100.3
7	23	1.1985e-05	1.91907e+06	111.38	34.0089	7.14214	3.28	2.00484			2468.35	5610.98	749.54	3326.59	704.51	13.46	718.72	102.41	570.03	109.84	262.53	32.14	176.39	22.2	7.12	135.68
8	9	1.1985e-05	750939	100.38	14.7882	4.94325	3.75	1.80684			4272.96	9079.1	1142.31	4385.62	602.98	98.47	312.14	31.25	124.73	20.95	44.82	5.37	27.19	3.55	23.17	1373.53
9	7	1.1985e-05	584063	17.22	66.7778	25.2948	2.81	0.30996			702.75	1030.71	102	353.28	51.59	12.53	49.34	6.44	36.52	7.49	18.98	2.86	16.8	2.76	-3.95	51.86
10	2	1.1985e-05	166875	54.96	6.0062	4.24968	2.55	0.98928			1709.46	2340.51	241.95	866.05	126.41	25.2	108	14.76	85.13	16.18	42.83	5.36	40.28	6.48	7.46	169.34
11	4	1.1985e-05	333751	34.05	19.3691	9.69663	3.02	0.6129			628.65	1451.7	192.6	825.08	138.06	16.46	137.2	18.32	105.49	21.34	59.28	8.29	63.08	10.56	4.67	100.36
12	13	1.1985e-05	1.08469e+06	15.61	136.072	37.8925	2.55	0.28098			544.1	784.11	81.91	305.15	48.22	11.13	48.34	6.15	37.5	6.82	20.02	2.82	20.76	2.57	7.34	39.32
13	11	1.1985e-05	917814	73.23	24.7564	7.48996	2.98	1.31814			122.68	338.53	54.36	258.86	52.25	16.88	59.64	8.97	56.23	12.19	34.85	5.71	40.36	7.15	6.27	32.8
14	12	1.1985e-05	1.00125e+06	129.5	15.2832	4.4284	2.88	2.331			193.46	809.96	196.98	1242.74	432.48	26.78	511.53	75.16	427.93	80.32	201.47	26.39	161.3	23.17	-4.26	9.73
15	6	1.1985e-05	500626	82.95	11.933	4.88077	2.85	1.4931			128.37	523.61	129.11	760.14	246.69	35.02	284.43	43.73	280.46	54.05	140.12	20.43	138.4	20.42	8.9	118.13
16	2	1.1985e-05	166875	6.06	54.2683	38.3975	3.01	0.10908			147.34	569.3	130.57	758.04	226.84	32.92	260.78	42.04	248.86	49.41	122.76	18.95	119.63	18.87	6.16	98.16
17	2	1.1985e-05	166875	10.83	30.4225	21.5254	2.78	0.19494			794.62	1572.84	224.47	889.25	115.05	28.33	68.63	6.21	29.71	4.52	9.81	1.45	5.42	0.75	7.76	52.72
M11
1	3	1.1985e-05	250313	26.39	18.7443	10.8322	2.56	0.47502			2812.31	5859.58	721.48	2824.43	483.27	51.8	402.93	50.64	281.05	52.87	124.44	14.77	90.98	13.11	10.58	152.65
2	1	1.1985e-05	83437.6	23.65	6.97834	6.98052	2.98	0.4257			2559.82	5409.62	658.07	2664.21	472.25	49.2	357.7	48.05	268.36	48.71	116.7	14.23	81.97	11.65	7.46	124.32
3	1	1.1985e-05	83437.6	5.11	32.2338	32.2439	2.51	0.09198			1082.76	2146.85	245.64	904.31	113.98	21.59	93.46	9.31	50.26	8.94	18.82	2.19	14.07	2.34	-5.44	16.37
4	7	1.1985e-05	584063	38.67	29.822	11.2963	2.81	0.69606			1659.35	3705.01	450.84	1749.7	320.42	25.94	271.65	42.93	277.95	60.1	173.27	25.48	187.07	29.37	-6.53	43.01
5	1	1.1985e-05	83437.6	30.95	5.33308	5.33475	2.75	0.5571			1272.14	2200.57	256.05	1029.14	143.15	21.44	105.22	11.34	53.55	9.06	23.52	3.17	15.39	2.96	-7.08	55.49
6	2	1.1985e-05	166875	19.27	17.1155	12.1101	3.02	0.34686			109.7	436.51	77.04	419.02	147.57	29.38	193.04	38.5	236.79	38.77	77.68	9.32	49.37	4.93	14.95	-1.01
7	4	1.1985e-05	333751	7.55	86.8963	43.5024	2.67	0.1359			353.5	981.03	170.48	956.03	357.84	12.02	381.12	51.12	262.45	46	124.73	19.44	115.79	16.78	15.76	11
8	1	1.1985e-05	83437.6	5.1	32.2968	32.3069	2.68	0.0918			1285.14	2769.11	378.04	1646.66	317.21	9.52	287.22	42.96	250.93	46.88	112.02	12.78	84.32	12.23	-5.54	18.18
9	8	1.1985e-05	667501	21.11	62.276	22.0729	3.03	0.37998			604.7	1703.45	289.3	1418.51	296.63	35.83	266.94	37.44	210.04	38.13	93.4	10.2	65.86	9.54	-6.31	42.19
10	2	1.1985e-05	166875	5.59	58.8104	41.6112	2.81	0.10062			805.47	1772.3	265.18	1148.77	210.86	38.21	155.61	20.22	109.57	18.39	41.46	4.7	26.96	3.5	-6.48	14.22
11	3	1.1985e-05	250313	17.69	27.9428	16.1479	2.41	0.31842			2471.65	5027.92	664.59	2563.08	428.8	48.72	353.63	48.21	272.9	49.73	116.68	11.87	76.62	10.74	-5.57	105.67
12	1	1.1985e-05	83437.6	6.19	26.6214	26.6297	3.81	0.11142			365.52	877.47	143.88	732.47	169.04	35.52	172.75	24.86	145.92	26.01	61.08	6	33.87	5.42	-6.41	23.39
13	2	1.1985e-05	166875	7.26	45.3298	32.0731	2.59	0.13068			587.11	1313.48	198.29	882.1	178.07	30.67	164.26	22.23	142.66	24.43	52.7	6.25	36.59	4.54	-5.49	24.81
14	3	1.1985e-05	250313	6.56	75.0766	43.3861	2.73	0.11808			804.65	1730.24	258.26	1089.5	183.77	43.33	145.26	20.07	120.6	21.2	53.42	5.85	39.01	5.6	-6.22	6.25
15	2	1.1985e-05	166875	3.68	89.1241	63.0596	2.21	0.06624			73.57	239.07	49.17	284.47	111.76	11.18	208.02	46.93	372.94	82.58	217.37	26.56	219.31	29.62	5.87	5.32
16	5	1.1985e-05	417188	22.46	36.6559	16.4186	3.77	0.40428			615.79	1320.95	207	914.84	191.83	36.81	175.37	24.75	153.42	26.4	60.77	6.9	43.02	5.01	-6.3	11.53
17	6	1.1985e-05	500626	7.74	126.751	51.8429	2.84	0.13932			692.37	831.88	78.31	261.62	34.78	7.81	30.43	4.18	21.13	4.27	7.73	1.24	9.32	1.62	-7.01	26.26
18	5	1.1985e-05	417188	45.79	18.0058	8.06499	2.61	0.82422			1275.81	2681.73	402.76	1670.05	310.8	39.88	298.14	43.99	259.29	46.61	107.96	11.06	76.44	11.27	-6.45	25.72
19	9	1.1985e-05	750939	16.93	87.1894	29.1448	2.64	0.30474			116.59	145.12	18.33	76.41	14.93	2.84	27.26	4.19	25.63	4.74	11.7	1.63	16.24	3.47	-5.94	47.07
20	6	1.1985e-05	500626	26.95	36.6586	14.9938	2.81	0.4851			367.31	842.82	142.97	658.72	133.16	30.69	133.97	19.63	118.65	20.09	51.7	4.89	37.84	4.81	-5.75	9.66
21	7	1.1985e-05	584063	105	10.9991	4.16635	2.55	1.89			2406.01	4748.4	650.44	2446.79	374.07	44.82	324.73	45.42	276.21	46.03	110.91	11.53	77.82	10.13	-6.85	83.19
22	2	1.1985e-05	166875	3.08	106.343	75.2432	2.68	0.05544			314.6	803.84	138.16	632.91	169.95	24.1	178	21.2	101.45	16.19	45.64	4.79	33.92	4.77	13.21	100.06
23	7	1.1985e-05	584063	15.57	73.8141	27.9601	2.69	0.28026			200.24	779.92	184.65	1099.32	393.27	41.98	471.12	85.51	585.97	116.2	283.55	31.69	256.84	37.93	20.08	66.39
M12
1	5	1.1985e-05	417188	11	74.6242	33.4251	1.89	0.198			228.09	621.56	92.06	429.19	85.96	14.56	82.64	11.77	65.65	12.64	33.01	4.75	31.18	4.07	-4.24	15.68
2	6	1.1985e-05	500626	9.29	105.776	43.2637	2.32	0.16722			647.29	1636.6	220.96	985.36	181.6	25.95	121.57	14.5	73.47	12.78	32.65	3.88	22.45	3.2	9.17	34.14
3	3	1.1985e-05	250313	26.93	18.369	10.6153	2.52	0.48474			163.25	435.62	61.87	335.12	104.08	8.47	139.26	20.43	119.86	27.1	60.92	6.54	31.59	4.52	5.93	15.27
4	1	1.1985e-05	83437.6	27.68	5.96282	5.96468	3.14	0.49824			908.47	2030.25	223.73	857.62	116.93	28.68	86.73	10.25	56.07	11.76	34.88	5.16	46.48	8.01	9.44	78.26
5	9	1.1985e-05	750939	32.68	45.316	15.1478	3.09	0.58824			407.2	910.2	123.12	622.39	129.13	14.09	117.91	17.82	104.26	17.87	47.54	6.52	40.69	6.17	-4.81	14.18
6	5	1.1985e-05	417188	7.1	115.25	51.622	1.86	0.1278			685.64	1182.18	118.37	475.12	66.65	14.27	53.84	6.17	28.75	5.75	13.39	1.64	13.03	2.26	9.48	30.86
7	5	1.1985e-05	417188	14.7	55.9224	25.0483	2.52	0.2646			69.24	168.93	28.41	184.79	75.69	65.88	98.34	14.48	92.25	21.14	59.98	8.07	65.04	9.29	-5.78	26.64
8	9	1.1985e-05	750939	25.16	58.7988	19.6546	2.28	0.45288			364.22	1122.3	180.46	919.82	219.55	16.78	187.4	24.51	134.12	25.78	64.09	7.66	52.55	7	7.07	30.05
9	1	1.1985e-05	83437.6	31.37	5.26171	5.26335	2.01	0.56466			817.16	1886.06	238.03	1034.79	194.75	17.55	172.72	23.83	148	29.72	82.45	11.49	89.88	12.94	-4.86	94.24
10	7	1.1985e-05	584063	41.08	28.0763	10.635	2.32	0.73944			581.33	1573.65	210.78	950.38	191.09	20.43	163.12	24.71	142.17	28.4	80.93	11.99	84.56	13.75	-4.37	89.17
11	3	1.1985e-05	250313	5.17	95.1133	54.9652	2.13	0.09306			296.9	764.03	101.22	472.84	79.36	16.18	59.62	8.38	42.67	8.13	20.09	2.74	18.45	2.1	-4.64	13.01
12	2	1.1985e-05	166875	16.44	20.0572	14.1915	1.87	0.29592			384.06	691.85	72.32	324.36	55.82	15.42	48.04	5.07	28.34	4.44	11.63	1.65	8.91	1.88	-4.56	45.04
13	1	1.1985e-05	83437.6	3.86	42.6377	42.6511	2.39	0.06948			212.67	363.94	36.19	149.36	21.62	8.05	15.64	2.19	9.94	1.81	4.35	-0.54	4.98	1.25	11.32	13.41
14	3	1.1985e-05	250313	43.91	11.2719	6.51393	2.54	0.79038			230.38	818.73	147.79	944.51	376.22	23.75	376.54	55.9	314.15	60.16	156.8	19.78	139.53	18.63	-4.58	41.34
15	6	1.1985e-05	500626	10.5	93.6745	38.3141	2.26	0.189			82.88	155.96	17.51	82.04	13.37	7.3	11.78	1.51	10.66	1.88	4.87	0.83	6.15	0.8	6.16	10.22
16	6	1.1985e-05	500626	10	98.3227	40.2152	2.31	0.18			366.09	724.56	80.37	349.8	53.8	13.54	49.85	5.55	32.48	6.87	17.35	2.46	20.02	2.91	-5.71	8.79
17	3	1.1985e-05	250313	35.48	13.9472	8.05995	2.58	0.63864			1285.88	2127.88	212.15	751.88	119.94	19.11	84.72	11.6	64.71	13.27	38.84	5.37	36.55	6.19	8.85	115.7
18	4	1.1985e-05	333751	70.57	9.35284	4.68226	3.45	1.27026			1658.21	2108.98	173.53	675	98.24	27.83	82.9	9.76	55.73	10.69	28.06	4.18	31.28	5.33	-5	228.01
19	2	1.1985e-05	166875	3.72	88.1723	62.3862	2.78	0.06696			56.21	262.7	55.26	326.41	89.66	8.53	78.88	10.21	53.39	9.67	22.59	2.65	15.32	2.18	-4.73	3.86
20	6	1.1985e-05	500626	19.68	50.1481	20.5112	2.78	0.35424			229.63	468.5	53.05	242.91	39.54	10.3	33.77	4.75	23.26	5.05	14.37	1.24	11.11	1.84	10.07	50.25
21	14	1.1985e-05	1.16813e+06	13.86	164.674	44.2031	3.12	0.24948			273.15	574.42	65.28	270.86	42.34	8.13	28.71	3.58	22.55	4.37	11.05	1.69	14.04	2.19	-5.03	35.04
22	1	1.1985e-05	83437.6	13.05	12.641	12.645	2.19	0.2349			30.74	142.41	25.78	160.76	38.71	7.63	34.15	4.25	19.33	4.09	10.22	1.21	10.22	1.42	-4.84	5.45
23	19	1.1985e-05	1.58531e+06	98.1	31.9027	7.36232	3.12	1.7658			128.93	350.12	54.42	308.88	70.54	14.38	65.34	8.08	47.63	9.47	20.77	3.14	18.58	2.26	6.05	4.1
24	1	1.1985e-05	83437.6	31.83	5.1857	5.18732	2.75	0.57294			83.86	264.25	49.12	329.28	187.25	21.09	314.77	68.01	494.47	110.63	297	42.36	263.94	31.91	5.99	2.47
25	3	1.1985e-05	250313	41.57	11.9058	6.88026	2.65	0.74826			1743.15	3157.06	265.6	942.71	117.74	19.28	94.34	12.63	66.62	14.05	44.42	7.92	60.15	10.71	7.09	131.43
M28
1	10	1.1985e-05	834376	9.38	173.681	55.0941	3.28	0.16884			1547.99	3464.2	414.12	1745.47	304.35	9.08	250.3	30.16	143.81	24.89	55.99	5.37	31.69	3.99	-4.69	30.76
2	2	1.1985e-05	166875	11.19	29.446	20.8345	3.28	0.20142			1030.93	2087.24	240.7	1018.92	183.94	31.96	139.57	14.46	64.74	10.71	24.16	2.83	13.15	2.69	5.86	82.09
3	2	1.1985e-05	166875	16.14	20.4294	14.4548	3.21	0.29052			187.11	619.13	88.41	428.9	85.76	9.46	76.11	8.43	45.62	9.44	23.86	2.36	16.58	2.91	-4.79	35.39
4	5	1.1985e-05	417188	64.94	12.7013	5.68906	2.67	1.16892			2917.06	6112.41	711.28	2684.32	352.35	51.67	180.74	17.82	72.65	12.15	29.56	3.45	18.99	2.87	18.32	796.92
5	4	1.1985e-05	333751	4.51	144.815	72.4982	2.26	0.08118			452.2	961.57	108	438.59	66.88	13.32	45.4	5.29	27.34	5.18	13.23	1.74	10.85	1.63	7.91	8.65
6	1	1.1985e-05	83437.6	29.94	5.51291	5.51463	2.83	0.53892			155.39	298.12	31.86	142.1	26.87	9.98	26.61	3.04	18.05	3.58	7.92	1.23	5.43	0.89	5.11	23.19
7	5	1.1985e-05	417188	8.97	91.3932	40.9361	3.44	0.16146			223.48	484.25	60.59	280.16	53.58	10.47	39.36	5.22	28.35	4.96	15.53	1.96	11.61	2.38	-4.48	17.84
8	5	1.1985e-05	417188	39.99	20.6131	9.23284	2.73	0.71982			690.81	956.96	78.58	265.8	39.64	7.05	37.29	4.66	26.26	5.49	17.38	2.49	15.96	2.34	-4.28	29.99
9	1	1.1985e-05	83437.6	37.96	4.34856	4.34992	2.52	0.68328			954.45	1281.55	104.93	350.95	47.17	12.92	39.74	6.16	31.71	6.89	19.87	3.06	26.45	4.88	-4.35	139.54
10	4	1.1985e-05	333751	3.99	163.451	81.8277	2.78	0.07182			668.88	1240.83	123.89	517.67	84.22	10.22	71.81	8.32	41.62	7.21	19.04	2.34	15.97	2.2	-4.55	14.85
11	1	1.1985e-05	83437.6	4.72	34.89	34.9009	2.26	0.08496			824.64	1740.15	200.92	827.56	132.62	18.27	111.18	14.11	75.99	14.6	39.29	5.52	34.32	4.56	-4.29	18.91
12	1	1.1985e-05	83437.6	16.24	10.1599	10.1631	2.55	0.29232			1101.27	2213.21	253.76	1032.09	162.27	20.22	114.84	12.74	66.23	12.1	33.31	3.21	23.08	3.16	-4.02	24.66
13	3	1.1985e-05	250313	31.22	15.8479	9.15839	2.16	0.56196			434.38	599.84	51.56	194.15	33.12	9.77	35.18	3.69	22.65	4.82	14.54	1.81	14.35	2.6	-3.99	40.01
14	2	1.1985e-05	166875	30.69	10.752	7.60757	2.28	0.55242			372.99	591.16	51.35	183.68	26.97	7.84	18.89	1.66	7.38	1.05	3.93	-0.38	6.95	1.43	5.74	14.54
15	2	1.1985e-05	166875	62.62	5.27179	3.73005	2.96	1.12716			1433.48	1558.43	126.4	475.22	73.21	21.3	59.38	8.09	43.54	8.03	25.65	2.54	19.78	3.7	10.05	73.37
16	8	1.1985e-05	667501	10.98	119.202	42.2496	2.91	0.19764			198.12	649.37	108.99	632.69	167.34	14.94	172.58	26.69	159.11	32.33	86	10.83	81.29	10.91	5.27	17.22
17	4	1.1985e-05	333751	36.25	18.1952	9.10898	2.92	0.6525			367.93	810.17	95.06	421.61	78.05	13.97	64.44	8.86	44.92	8.92	23.11	2.95	21.39	2.57	5.41	27.23
18	8	1.1985e-05	667501	16.91	77.6509	27.5223	3.36	0.30438			5062.01	9950.1	1053.6	4262.04	604.88	123.42	381.49	40.47	174.96	27.51	53.8	5.21	28.21	3.01	11.26	118.69
19	3	1.1985e-05	250313	18.16	27.2212	15.7309	4.19	0.32688			6024.95	11999	1253.49	4703.48	665.01	133.04	419.92	46.9	191.86	29.74	63.18	5.87	33.03	4.1	11.46	131.45
20	3	1.1985e-05	250313	34.95	14.1584	8.18204	2.84	0.6291			966.9	1054.95	81.51	291.82	40.89	9.2	43.46	4.54	27.62	5.45	13.49	1.68	10.39	2.4	-4.1	112.86
21	3	1.1985e-05	250313	5.56	88.4873	51.136	3.99	0.10008			575.11	1125.06	107.07	396.18	55.52	11.69	45.34	5.38	31.35	7.64	22.89	2.51	32.17	5.51	4.41	13.52
22	5	1.1985e-05	417188	19	43.3087	19.3985	2.81	0.342			862.27	1743.74	194.66	797.93	135.37	6.81	113.25	15.79	88.16	18.09	45.6	6.42	40.78	6.05	-4.49	27.97
23	2	1.1985e-05	166875	40.61	8.12722	5.7504	2.91	0.73098			997.42	1281.37	108.06	379.42	57.78	13.13	54.48	8.48	45.9	10.38	29.13	4.35	33.5	5.18	-3.54	100.25
24	1	1.1985e-05	83437.6	12.58	13.1128	13.1169	2.99	0.22644			999.65	1353.13	108.76	396.5	57.46	9.51	52.55	6.28	28.28	6.52	18.46	2.37	15.6	2.34	6.6	48.05
25	4	1.1985e-05	333751	13.02	50.5317	25.2974	3.31	0.23436			412.11	783.02	83.98	326.7	50.75	10.82	40.85	4.78	26.41	5.78	12.88	2.02	10.44	1.89	-4.16	30.72
26	3	1.1985e-05	250313	74.58	6.63886	3.83654	2.97	1.34244			322.37	875.42	110.53	507.03	89.6	15.22	72.93	9.54	49.45	9.91	25.97	4.02	24.17	4.35	-4.26	90.13
27	6	1.1985e-05	500626	73.78	13.4146	5.48676	3.11	1.32804			306.26	901.87	122.51	566.4	108.23	19.89	99.15	12.44	70.25	14.23	36.9	4.33	31.25	4.74	5.61	38.78
28	1	1.1985e-05	83437.6	29.62	5.57244	5.57419	3.15	0.53316			817.49	1479.65	163.83	717.24	125.01	13	98.97	11.72	61.21	12.77	32.86	4	24.85	4.02	-4.24	94.25
29	3	1.1985e-05	250313	4.97	98.9116	57.1602	3.27	0.08946			368.09	845.89	107.3	480.36	80.02	15.79	56.32	7.18	34.92	5.83	14.39	1.89	9.7	1.66	6.46	9.33
30	4	1.1985e-05	333751	22.88	28.8039	14.42	3.55	0.41184			1034.73	1373.72	124.61	438.83	67.46	9.69	61.04	8.66	46.26	9.74	28.83	3.79	28.52	4.8	5.25	45.51
31	1	1.1985e-05	83437.6	34.02	4.852	4.85352	3.22	0.61236			308.7	1030.81	167.61	878.31	215.84	13.26	187.24	30.18	173.33	35.52	96.52	12.59	89.98	12.79	8.24	39.76
32	1	1.1985e-05	83437.6	3.94	41.7748	41.7879	2.83	0.07092			256.43	655.67	90.06	436.55	80.5	16.39	59.12	7.55	32.68	5.04	10.49	0.97	7.36	1.19	-4.92	7.21
[truncated: 207 more columns]

## Sheet: Apatite fission track length
Table S3B. Apatite fission track length
mm-2-3
Spot Name	Spot Index	Track	Length	Angle to c	UPb Age (Ma)	2 sigma (Ma)	Etch Figs.	Dpar (um)	Dper (um)	[U] (ppm)	[Th] (ppm)	[Sm] (ppm)	Spike Ca	Spike 206Pb/238U	Spike 207Pb/238U	Spike 208Pb/232Th	Spike 238U/Ca	Spike 232Th/Ca	Spike 147Sm/Ca	Quality: Bkg	Quality: Bkg Iso	Quality: Q	Quality: Q Iso	Quality: Del	Quality: Del Iso	Quality: 204Pb	Quality: Mineral	rmr0	Isotopes	-	23Na wt% oxide raw	23Na wt% oxide raw 1sig	24Mg wt% oxide raw	24Mg wt% oxide raw 1sig	27Al/43Ca raw	27Al/43Ca raw 1sig	29Si/43Ca raw	29Si/43Ca raw 1sig	31P wt% oxide raw	31P wt% oxide raw 1sig	34S wt% oxide raw	34S wt% oxide raw 1sig	35Cl wt% oxide raw	35Cl wt% oxide raw 1sig	43Ca wt% oxide raw	43Ca wt% oxide raw 1sig	48Ca/43Ca raw	48Ca/43Ca raw 1sig	55Mn wt% oxide raw
1325_001__Ap_a_02_1	1	1	13.71	85.1	105.89	38.77	2	1.8	0.27	18	75	10	1.69	0.96	0.75	0.89	1.1	1.21	2.11	0	208Pb	1	43Ca	1	43Ca	2.03	26.13	0.8483	39	-	0.020215	0.00740127	0.00184	0.0014437	0.0019086	0.00239219	0	0	43.9742	1.77526	0.100781	0.0869529	0.249132	0.0503311	54.0994	0.798269	1.44552	0.0247729	0.0536602
1325_001__Ap_a_02_2	2	1	12.6	72.27	95.05	53.64	4	2.45	0.57	18	84	37	1.11	0.42	0.34	0.45	3.99	3.68	1.4	0		1	43Ca	1	43Ca	1.55	26.54	0.8116	39	-	0.0288929	0.00556461	0.0100997	0.00342079	0.0057721	0.00205983	0.134774	0.247282	47.6457	1.72507	0.300639	0.111445	0.924847	0.100753	54.0933	0.96478	1.4301	0.0266858	0.0849425
1325_001__Ap_a_02_3	3	1	10.15	73.54	93.06	44.87	4	2.31	0.37	16	95	89	0.75	0.8	1.02	1.28	1.23	0.96	0.84	0.01	206Pb	1	43Ca	1	43Ca	1.18	23.54	0.7607	39	-	0.0299019	0.00669696	0.0166231	0.00457868	0	0	0	0	36.7242	2.31668	0.212466	0.110617	1.25053	0.0495157	54.0872	0.730613	1.42773	0.0167077	0.115306
1325_001__Ap_a_02_4	4	1	11.07	62.69	97.21	96.63	4	2	0.35	10	25	17	1.51	1.11	1.04	1.23	0.91	0.78	0.4	0	207Pb	1	43Ca	1	43Ca	1.42	24	0.845	39	-	0.0680842	0.00683078	0.0199046	0.00546804	0.0021668	0.00128007	0.258519	0.256622	36.3916	2.33768	0.29528	0.128261	0.196938	0.106327	54.0812	0.794351	1.44963	0.0188183	0.0795619
1325_001__Ap_a_02_4	4	2	13.83	52.31	97.21	96.63	4	2	0.35	10	25	17	1.51	1.11	1.04	1.23	0.91	0.78	0.4	0	207Pb	1	43Ca	1	43Ca	1.42	24	0.845	39	-	0.0680842	0.00683078	0.0199046	0.00546804	0.0021668	0.00128007	0.258519	0.256622	36.3916	2.33768	0.29528	0.128261	0.196938	0.106327	54.0812	0.794351	1.44963	0.0188183	0.0795619
1325_001__Ap_a_02_5	5	1	14.18	63.16	83.94	32.67	0	0	0	26	127	58	1.22	1.07	0.8	0.7	1.23	1.43	1.16	0	208Pb	1	43Ca	1	43Ca	2.12	22.81	0.8525	39	-	0.0151515	0.0101277	0.00802858	0.00315718	0.00136113	0.00113559	0.0414273	0.277228	32.6052	1.53025	0.271574	0.0718946	0.11628	0.0448203	54.0751	0.887074	1.45254	0.0241973	0.0561275
1325_001__Ap_a_02_6	6	1	16.06	31.06	90.23	22.95	4	2.7	0.51	44	138	210	1.45	1.04	0.78	0.88	1.28	1.18	1.11	0.01	207Pb	1	43Ca	1	43Ca	3.31	24.94	0.7972	39	-	0.0593162	0.00594612	0.0316833	0.00340111	0.00782004	0.00389746	0.256773	0.163145	44.0643	1.23548	0.241767	0.0730476	0.860521	0.0828133	54.069	0.70146	1.48101	0.0220485	0.104769
1325_001__Ap_a_02_6	6	2	12.95	65.71	90.23	22.95	4	2.7	0.51	44	138	210	1.45	1.04	0.78	0.88	1.28	1.18	1.11	0.01	207Pb	1	43Ca	1	43Ca	3.31	24.94	0.7972	39	-	0.0593162	0.00594612	0.0316833	0.00340111	0.00782004	0.00389746	0.256773	0.163145	44.0643	1.23548	0.241767	0.0730476	0.860521	0.0828133	54.069	0.70146	1.48101	0.0220485	0.104769
1325_001__Ap_a_02_6	6	3	13.51	48.07	90.23	22.95	4	2.7	0.51	44	138	210	1.45	1.04	0.78	0.88	1.28	1.18	1.11	0.01	207Pb	1	43Ca	1	43Ca	3.31	24.94	0.7972	39	-	0.0593162	0.00594612	0.0316833	0.00340111	0.00782004	0.00389746	0.256773	0.163145	44.0643	1.23548	0.241767	0.0730476	0.860521	0.0828133	54.069	0.70146	1.48101	0.0220485	0.104769
1325_001__Ap_a_02_6	6	4	15.63	38.43	90.23	22.95	4	2.7	0.51	44	138	210	1.45	1.04	0.78	0.88	1.28	1.18	1.11	0.01	207Pb	1	43Ca	1	43Ca	3.31	24.94	0.7972	39	-	0.0593162	0.00594612	0.0316833	0.00340111	0.00782004	0.00389746	0.256773	0.163145	44.0643	1.23548	0.241767	0.0730476	0.860521	0.0828133	54.069	0.70146	1.48101	0.0220485	0.104769
1325_001__Ap_a_02_6	6	5	8.32	82.32	90.23	22.95	4	2.7	0.51	44	138	210	1.45	1.04	0.78	0.88	1.28	1.18	1.11	0.01	207Pb	1	43Ca	1	43Ca	3.31	24.94	0.7972	39	-	0.0593162	0.00594612	0.0316833	0.00340111	0.00782004	0.00389746	0.256773	0.163145	44.0643	1.23548	0.241767	0.0730476	0.860521	0.0828133	54.069	0.70146	1.48101	0.0220485	0.104769
1325_001__Ap_a_02_6	6	6	15.02	63.34	90.23	22.95	4	2.7	0.51	44	138	210	1.45	1.04	0.78	0.88	1.28	1.18	1.11	0.01	207Pb	1	43Ca	1	43Ca	3.31	24.94	0.7972	39	-	0.0593162	0.00594612	0.0316833	0.00340111	0.00782004	0.00389746	0.256773	0.163145	44.0643	1.23548	0.241767	0.0730476	0.860521	0.0828133	54.069	0.70146	1.48101	0.0220485	0.104769
1325_001__Ap_a_02_6	6	7	14.2	61.14	90.23	22.95	4	2.7	0.51	44	138	210	1.45	1.04	0.78	0.88	1.28	1.18	1.11	0.01	207Pb	1	43Ca	1	43Ca	3.31	24.94	0.7972	39	-	0.0593162	0.00594612	0.0316833	0.00340111	0.00782004	0.00389746	0.256773	0.163145	44.0643	1.23548	0.241767	0.0730476	0.860521	0.0828133	54.069	0.70146	1.48101	0.0220485	0.104769
1325_001__Ap_a_02_6	6	8	15.83	20.78	90.23	22.95	4	2.7	0.51	44	138	210	1.45	1.04	0.78	0.88	1.28	1.18	1.11	0.01	207Pb	1	43Ca	1	43Ca	3.31	24.94	0.7972	39	-	0.0593162	0.00594612	0.0316833	0.00340111	0.00782004	0.00389746	0.256773	0.163145	44.0643	1.23548	0.241767	0.0730476	0.860521	0.0828133	54.069	0.70146	1.48101	0.0220485	0.104769
1325_001__Ap_a_02_7	7	1	15.03	43.96	76.61	176.23	4	1.94	0.35	2	22	67	0.88	1	1.14	0.84	1.07	1.29	0.8	0.01	208Pb	1	43Ca	1	43Ca	1.14	24.58	0.8538	39	-	0.0638942	0.00727752	0.00532692	0.00369829	0.00449246	0.00245076	0.376813	0.256366	43.7602	1.75814	0.323609	0.089954	0.0568445	0.0782026	54.063	0.935399	1.42275	0.0250168	0.118398
1325_001__Ap_a_02_7	7	2	10.17	55.17	76.61	176.23	4	1.94	0.35	2	22	67	0.88	1	1.14	0.84	1.07	1.29	0.8	0.01	208Pb	1	43Ca	1	43Ca	1.14	24.58	0.8538	39	-	0.0638942	0.00727752	0.00532692	0.00369829	0.00449246	0.00245076	0.376813	0.256366	43.7602	1.75814	0.323609	0.089954	0.0568445	0.0782026	54.063	0.935399	1.42275	0.0250168	0.118398
1325_001__Ap_a_02_7	7	3	13.04	43.09	76.61	176.23	4	1.94	0.35	2	22	67	0.88	1	1.14	0.84	1.07	1.29	0.8	0.01	208Pb	1	43Ca	1	43Ca	1.14	24.58	0.8538	39	-	0.0638942	0.00727752	0.00532692	0.00369829	0.00449246	0.00245076	0.376813	0.256366	43.7602	1.75814	0.323609	0.089954	0.0568445	0.0782026	54.063	0.935399	1.42275	0.0250168	0.118398
1325_001__Ap_a_02_8	8	1	14.4	20.75	116.62	313.26	4	2.75	0.69	9	70	57	0.82	6.1	10.47	11.8	1.61	2.11	4.93	0	206Pb	1	43Ca	1	43Ca	2.26	20.67	0.8133	39	-	0.0753862	0.0105903	0.229321	0.0310215	1.27419	0.0846662	0.342377	0.223387	31.9983	1.5893	0.212136	0.129103	0.390627	0.131011	54.057	0.720863	1.41261	0.0192247	0.0718058
1325_001__Ap_a_02_9	9	1	12.66	69.49	241.88	30.4	4	2.72	0.43	50	406	63	1.41	0.91	0.91	0.97	1.33	1.25	0.99	0	207Pb	1	43Ca	1	43Ca	1.77	26.63	0.8417	39	-	0.0437124	0.0091547	0.0163253	0.00342088	0.00505377	0.00221887	0	0	44.8767	2.28234	0.286189	0.112918	0.248736	0.075856	54.0509	1.42576	1.48547	0.0368871	0.0746987
1325_001__Ap_a_02_10	10	1	13.43	79.95	141.36	144.25	1	2.3	0.51	4	36	124	1.82	0.9	0.84	0.8	1.14	1.09	1	0.01	208Pb	1	43Ca	1	43Ca	2.83	25.63	0.82	39	-	0.0954266	0.00889611	0.0199338	0.00605118	0.0387476	0.00378504	0.364567	0.233161	38.759	1.5856	0.327729	0.079421	0.47218	0.0667227	54.0448	0.603062	1.4607	0.0143344	0.18511
1325_001__Ap_a_02_11	11	1	11.98	29.87	108.96	34.6	4	1.9	0.5	15	41	23	1.22	1.05	0.91	0.98	1.27	1.42	0.74	0		1	43Ca	1	43Ca	2.34	24.89	0.8507	39	-	0.00491876	0.00985278	0.00708127	0.00304021	0.00268373	0.00184002	0	0	42.2535	1.55298	0.210165	0.0959352	0.230601	0.0544605	54.0388	1.31518	1.44519	0.0401298	0.0543061
1325_001__Ap_a_02_12	12	1	15.51	7.89	115.11	134.4	4	2.8	0.54	4	19	18	1.27	0.67	0.92	1.03	1.5	1.32	1.3	0		1	43Ca	1	43Ca	2.65	27.85	0.8353	39	-	0.0955775	0.0085416	0.0157399	0.00325163	0.00119676	0.00186688	0	0	54.4166	1.81253	0.197155	0.0955904	0.45851	0.0574743	54.0328	0.795205	1.452	0.0313142	0.0636012
1325_001__Ap_a_02_12	12	2	13.77	77.58	115.11	134.4	4	2.8	0.54	4	19	18	1.27	0.67	0.92	1.03	1.5	1.32	1.3	0		1	43Ca	1	43Ca	2.65	27.85	0.8353	39	-	0.0955775	0.0085416	0.0157399	0.00325163	0.00119676	0.00186688	0	0	54.4166	1.81253	0.197155	0.0955904	0.45851	0.0574743	54.0328	0.795205	1.452	0.0313142	0.0636012
1325_001__Ap_a_02_13	13	1	14.11	84.61	92.74	59.91	4	2.43	0.54	11	22	17	0.86	1.17	1.21	1.29	1.29	1.19	0.44	0	206Pb	1	43Ca	1	43Ca	3.46	28.69	0.8569	39	-	0.0438268	0.00407706	0.00627931	0.0018711	0.000543415	0.00256425	0	0	48.8046	1.67987	0.258674	0.085177	0.0865043	0.0670146	54.0095	0.878495	1.48368	0.0230975	0.0689519
1325_001__Ap_a_02_14	14	1	10.48	73.51	96.29	79.59	4	2.24	0.41	10	105	22	2.02	0.79	0.76	0.8	1.37	1.36	1.04	0.01	207Pb	1	43Ca	1	43Ca	4.15	33.07	0.8485	39	-	0.0377672	0.00580795	0.0193393	0.00517581	0	0	0	0	53.2537	2.37424	0.138563	0.062854	0.195902	0.0385499	53.9847	0.495999	1.46448	0.0135642	0.069052
1325_001__Ap_a_02_14	14	2	17.21	39.51	96.29	79.59	4	2.24	0.41	10	105	22	2.02	0.79	0.76	0.8	1.37	1.36	1.04	0.01	207Pb	1	43Ca	1	43Ca	4.15	33.07	0.8485	39	-	0.0377672	0.00580795	0.0193393	0.00517581	0	0	0	0	53.2537	2.37424	0.138563	0.062854	0.195902	0.0385499	53.9847	0.495999	1.46448	0.0135642	0.069052
1325_001__Ap_a_02_14	14	3	9.53	51.79	96.29	79.59	4	2.24	0.41	10	105	22	2.02	0.79	0.76	0.8	1.37	1.36	1.04	0.01	207Pb	1	43Ca	1	43Ca	4.15	33.07	0.8485	39	-	0.0377672	0.00580795	0.0193393	0.00517581	0	0	0	0	53.2537	2.37424	0.138563	0.062854	0.195902	0.0385499	53.9847	0.495999	1.46448	0.0135642	0.069052
1325_001__Ap_a_02_14	14	4	13.78	50.45	96.29	79.59	4	2.24	0.41	10	105	22	2.02	0.79	0.76	0.8	1.37	1.36	1.04	0.01	207Pb	1	43Ca	1	43Ca	4.15	33.07	0.8485	39	-	0.0377672	0.00580795	0.0193393	0.00517581	0	0	0	0	53.2537	2.37424	0.138563	0.062854	0.195902	0.0385499	53.9847	0.495999	1.46448	0.0135642	0.069052
1325_001__Ap_a_02_15	15	1	15.39	67.41	106.56	68.1	4	1.8	0.48	9	17	13	1.27	0.91	0.95	0.94	1	1.09	0.6	0	208Pb	1	43Ca	1	43Ca	2.47	29.15	0.8597	39	-	0.019399	0.00679004	0.0023531	0.00211497	0.00231898	0.00182211	0.0436711	0.217851	51.4981	1.39529	0.235146	0.0984606	0.0886631	0.0380617	53.9599	1.27064	1.45906	0.0360407	0.0320584
1325_001__Ap_a_02_16	16	1	14.13	23.37	107.21	37.32	4	2.88	0.51	21	92	37	1.4	1.18	1.04	1.42	1.12	0.98	0.57	0	206Pb	1	43Ca	1	43Ca	2.94	28.68	0.8459	39	-	0.102123	0.0105245	0.0206159	0.00329561	0.00132303	0.00217033	0.100065	0.156267	50.2324	2.71139	0.175861	0.109241	0.246843	0.0689709	53.9352	0.651294	1.44564	0.0143229	0.0531322
1325_001__Ap_a_02_16	16	2	12.65	54.6	107.21	37.32	4	2.88	0.51	21	92	37	1.4	1.18	1.04	1.42	1.12	0.98	0.57	0	206Pb	1	43Ca	1	43Ca	2.94	28.68	0.8459	39	-	0.102123	0.0105245	0.0206159	0.00329561	0.00132303	0.00217033	0.100065	0.156267	50.2324	2.71139	0.175861	0.109241	0.246843	0.0689709	53.9352	0.651294	1.44564	0.0143229	0.0531322
1325_001__Ap_a_02_16	16	3	13.2	72.03	107.21	37.32	4	2.88	0.51	21	92	37	1.4	1.18	1.04	1.42	1.12	0.98	0.57	0	206Pb	1	43Ca	1	43Ca	2.94	28.68	0.8459	39	-	0.102123	0.0105245	0.0206159	0.00329561	0.00132303	0.00217033	0.100065	0.156267	50.2324	2.71139	0.175861	0.109241	0.246843	0.0689709	53.9352	0.651294	1.44564	0.0143229	0.0531322
1325_001__Ap_a_02_16	16	4	12.42	57.95	107.21	37.32	4	2.88	0.51	21	92	37	1.4	1.18	1.04	1.42	1.12	0.98	0.57	0	206Pb	1	43Ca	1	43Ca	2.94	28.68	0.8459	39	-	0.102123	0.0105245	0.0206159	0.00329561	0.00132303	0.00217033	0.100065	0.156267	50.2324	2.71139	0.175861	0.109241	0.246843	0.0689709	53.9352	0.651294	1.44564	0.0143229	0.0531322
1325_001__Ap_a_02_16	16	5	12.59	39.62	107.21	37.32	4	2.88	0.51	21	92	37	1.4	1.18	1.04	1.42	1.12	0.98	0.57	0	206Pb	1	43Ca	1	43Ca	2.94	28.68	0.8459	39	-	0.102123	0.0105245	0.0206159	0.00329561	0.00132303	0.00217033	0.100065	0.156267	50.2324	2.71139	0.175861	0.109241	0.246843	0.0689709	53.9352	0.651294	1.44564	0.0143229	0.0531322
1325_001__Ap_a_02_17	17	1	14	44.69	82.61	80.76	4	2.93	0.51	10	26	108	1.48	0.85	0.76	0.88	1.48	1.19	1.25	0.01	207Pb	1	43Ca	1	43Ca	3.09	26.3	0.7256	39	-	0.127819	0.008643	0.0451864	0.00618804	0.00137469	0.00214602	0.00110294	0.0964333	45.052	2.00491	0.26387	0.0974155	1.86812	0.069196	53.9105	0.719014	1.41576	0.0173943	0.121764
1325_001__Ap_a_02_17	17	2	14.43	63.71	82.61	80.76	4	2.93	0.51	10	26	108	1.48	0.85	0.76	0.88	1.48	1.19	1.25	0.01	207Pb	1	43Ca	1	43Ca	3.09	26.3	0.7256	39	-	0.127819	0.008643	0.0451864	0.00618804	0.00137469	0.00214602	0.00110294	0.0964333	45.052	2.00491	0.26387	0.0974155	1.86812	0.069196	53.9105	0.719014	1.41576	0.0173943	0.121764
1325_001__Ap_a_02_17	17	3	16.17	29.19	82.61	80.76	4	2.93	0.51	10	26	108	1.48	0.85	0.76	0.88	1.48	1.19	1.25	0.01	207Pb	1	43Ca	1	43Ca	3.09	26.3	0.7256	39	-	0.127819	0.008643	0.0451864	0.00618804	0.00137469	0.00214602	0.00110294	0.0964333	45.052	2.00491	0.26387	0.0974155	1.86812	0.069196	53.9105	0.719014	1.41576	0.0173943	0.121764
1325_001__Ap_a_02_18	18	1	15.67	52.83	107.73	56.25	4	2.49	0.51	11	39	26	0.89	0.94	1.71	1.3	1.17	1.17	1.03	0.01	206Pb	1	43Ca	1	43Ca	2.76	25.82	0.8489	39	-	0.039825	0.00465493	0.00699987	0.00236023	0.00329609	0.00144896	0	0	45.4328	1.06397	0.279488	0.0647911	0.202134	0.0761683	53.8858	0.888631	1.45069	0.0234001	0.0866889
1325_001__Ap_a_02_18	18	2	14.88	76.66	107.73	56.25	4	2.49	0.51	11	39	26	0.89	0.94	1.71	1.3	1.17	1.17	1.03	0.01	206Pb	1	43Ca	1	43Ca	2.76	25.82	0.8489	39	-	0.039825	0.00465493	0.00699987	0.00236023	0.00329609	0.00144896	0	0	45.4328	1.06397	0.279488	0.0647911	0.202134	0.0761683	53.8858	0.888631	1.45069	0.0234001	0.0866889
1325_001__Ap_a_02_18	18	3	14.34	88.82	107.73	56.25	4	2.49	0.51	11	39	26	0.89	0.94	1.71	1.3	1.17	1.17	1.03	0.01	206Pb	1	43Ca	1	43Ca	2.76	25.82	0.8489	39	-	0.039825	0.00465493	0.00699987	0.00236023	0.00329609	0.00144896	0	0	45.4328	1.06397	0.279488	0.0647911	0.202134	0.0761683	53.8858	0.888631	1.45069	0.0234001	0.0866889
1325_001__Ap_a_02_19	19	1	14.32	40.26	86.35	32.42	4	3.07	0.7	26	42	109	0.94	0.57	0.78	0.78	1.72	1.69	1.2	0		1	43Ca	1	43Ca	5.95	27.85	0.7758	39	-	0.0789638	0.0112128	0.0305975	0.00436678	0.00219555	0.00192699	0.0634734	0.208499	52.5561	2.36405	0.244653	0.060892	1.35461	0.099235	53.8611	0.990922	1.45528	0.0243481	0.0973415
1325_001__Ap_a_02_19	19	2	15.02	46.02	86.35	32.42	4	3.07	0.7	26	42	109	0.94	0.57	0.78	0.78	1.72	1.69	1.2	0		1	43Ca	1	43Ca	5.95	27.85	0.7758	39	-	0.0789638	0.0112128	0.0305975	0.00436678	0.00219555	0.00192699	0.0634734	0.208499	52.5561	2.36405	0.244653	0.060892	1.35461	0.099235	53.8611	0.990922	1.45528	0.0243481	0.0973415
1325_001__Ap_a_02_19	19	3	15.05	23.99	86.35	32.42	4	3.07	0.7	26	42	109	0.94	0.57	0.78	0.78	1.72	1.69	1.2	0		1	43Ca	1	43Ca	5.95	27.85	0.7758	39	-	0.0789638	0.0112128	0.0305975	0.00436678	0.00219555	0.00192699	0.0634734	0.208499	52.5561	2.36405	0.244653	0.060892	1.35461	0.099235	53.8611	0.990922	1.45528	0.0243481	0.0973415
1325_001__Ap_a_02_19	19	4	13.65	48.82	86.35	32.42	4	3.07	0.7	26	42	109	0.94	0.57	0.78	0.78	1.72	1.69	1.2	0		1	43Ca	1	43Ca	5.95	27.85	0.7758	39	-	0.0789638	0.0112128	0.0305975	0.00436678	0.00219555	0.00192699	0.0634734	0.208499	52.5561	2.36405	0.244653	0.060892	1.35461	0.099235	53.8611	0.990922	1.45528	0.0243481	0.0973415
1325_001__Ap_a_02_19	19	5	15.98	29.06	86.35	32.42	4	3.07	0.7	26	42	109	0.94	0.57	0.78	0.78	1.72	1.69	1.2	0		1	43Ca	1	43Ca	5.95	27.85	0.7758	39	-	0.0789638	0.0112128	0.0305975	0.00436678	0.00219555	0.00192699	0.0634734	0.208499	52.5561	2.36405	0.244653	0.060892	1.35461	0.099235	53.8611	0.990922	1.45528	0.0243481	0.0973415
1325_001__Ap_a_02_19	19	6	16.4	42.14	86.35	32.42	4	3.07	0.7	26	42	109	0.94	0.57	0.78	0.78	1.72	1.69	1.2	0		1	43Ca	1	43Ca	5.95	27.85	0.7758	39	-	0.0789638	0.0112128	0.0305975	0.00436678	0.00219555	0.00192699	0.0634734	0.208499	52.5561	2.36405	0.244653	0.060892	1.35461	0.099235	53.8611	0.990922	1.45528	0.0243481	0.0973415
1325_001__Ap_a_02_19	19	7	4.99	52.58	86.35	32.42	4	3.07	0.7	26	42	109	0.94	0.57	0.78	0.78	1.72	1.69	1.2	0		1	43Ca	1	43Ca	5.95	27.85	0.7758	39	-	0.0789638	0.0112128	0.0305975	0.00436678	0.00219555	0.00192699	0.0634734	0.208499	52.5561	2.36405	0.244653	0.060892	1.35461	0.099235	53.8611	0.990922	1.45528	0.0243481	0.0973415
1325_001__Ap_a_02_19	19	8	15.35	25.6	86.35	32.42	4	3.07	0.7	26	42	109	0.94	0.57	0.78	0.78	1.72	1.69	1.2	0		1	43Ca	1	43Ca	5.95	27.85	0.7758	39	-	0.0789638	0.0112128	0.0305975	0.00436678	0.00219555	0.00192699	0.0634734	0.208499	52.5561	2.36405	0.244653	0.060892	1.35461	0.099235	53.8611	0.990922	1.45528	0.0243481	0.0973415
1325_001__Ap_a_02_19	19	9	9.36	83.68	86.35	32.42	4	3.07	0.7	26	42	109	0.94	0.57	0.78	0.78	1.72	1.69	1.2	0		1	43Ca	1	43Ca	5.95	27.85	0.7758	39	-	0.0789638	0.0112128	0.0305975	0.00436678	0.00219555	0.00192699	0.0634734	0.208499	52.5561	2.36405	0.244653	0.060892	1.35461	0.099235	53.8611	0.990922	1.45528	0.0243481	0.0973415
1325_001__Ap_a_02_20	20	1	14.21	47.47	175.4	194.9	4	2.91	0.44	2	15	84	1.72	0.91	1.23	0.91	0.82	1	0.92	0	207Pb	1	43Ca	1	43Ca	3.78	27.85	0.7526	39	-	0.0670942	0.00628291	0.173632	0.00994407	0.00172119	0.00152738	0	0	48.0579	1.44938	0.213185	0.0587642	1.23674	0.0542889	53.8364	0.504184	1.42985	0.0168181	0.0712086
1325_001__Ap_a_02_21	21	1	17.91	45.3	113.31	120.53	4	3.17	1.16	7	118	262	1.19	0.74	1.2	1.08	1.54	1.28	1.01	0	207Pb	1	43Ca	1	43Ca	4.1	23.7	0.7173	39	-	0.12168	0.00851661	0.349205	0.0182512	0.00247296	0.0035045	0	0	32.8698	1.32311	0.265406	0.0978172	1.1766	0.0997378	53.8118	1.05978	1.42458	0.029704	0.196919
1325_001__Ap_a_02_21	21	2	16.31	62.32	113.31	120.53	4	3.17	1.16	7	118	262	1.19	0.74	1.2	1.08	1.54	1.28	1.01	0	207Pb	1	43Ca	1	43Ca	4.1	23.7	0.7173	39	-	0.12168	0.00851661	0.349205	0.0182512	0.00247296	0.0035045	0	0	32.8698	1.32311	0.265406	0.0978172	1.1766	0.0997378	53.8118	1.05978	1.42458	0.029704	0.196919
1325_001__Ap_a_02_22	22	1	14.75	54.02	420.45	88.68	4	2.28	0.42	17	66	55	1.1	0.73	0.59	0.71	1.59	1.63	0.86	0	208Pb	1	43Ca	1	43Ca	2.98	27.21	0.8583	39	-	0.00267474	0.00820714	0.0123663	0.0883132	0.000982094	0.00179974	0	0	50.2095	1.94193	0.154782	0.0676402	0.0985951	0.0288063	54.0994	1.21315	1.44035	0.0334065	0.0489226
1325_001__Ap_a_02_23	23	1	14.81	32.91	80.85	49.47	4	2.08	0.4	13	17	124	1.51	1.05	0.72	0.94	1.1	1.03	1.26	0.01	207Pb	1	43Ca	1	43Ca	2.26	28.12	0.8151	39	-	0.0725127	0.00840066	0.0166282	0.00314279	0.00383467	0.00227371	0	0	50.8454	1.9337	0.184856	0.0833279	0.754206	0.0727067	54.0933	0.654915	1.44541	0.0188918	0.0886635
1325_001__Ap_a_02_24	24	1	13.9	69.46	79.16	49.49	4	2.33	0.57	27	24	11	1.46	0.24	0.31	2.74	4.59	0.34	0.26	0	207Pb	1	43Ca	1	43Ca	2.32	26.49	0.8499	39	-	0.0491833	0.00633346	0.0206871	0.00331109	0	0	0.0723034	0.160466	41.6136	1.87066	0.201593	0.083104	0.11506	0.0580497	54.0872	0.930169	1.45376	0.0217654	0.109168
1325_001__Ap_a_02_24	24	2	12.99	60.41	79.16	49.49	4	2.33	0.57	27	24	11	1.46	0.24	0.31	2.74	4.59	0.34	0.26	0	207Pb	1	43Ca	1	43Ca	2.32	26.49	0.8499	39	-	0.0491833	0.00633346	0.0206871	0.00331109	0	0	0.0723034	0.160466	41.6136	1.87066	0.201593	0.083104	0.11506	0.0580497	54.0872	0.930169	1.45376	0.0217654	0.109168
1325_001__Ap_a_02_25	25	1	14.17	69.9	97.09	33.7	4	2.12	0.45	26	92	12	1.21	0.79	0.79	0.76	1.42	1.42	0.47	0	206Pb	1	43Ca	1	43Ca	3.04	30.89	0.8446	39	-	0.0296949	0.0090659	0.0233996	0.00376653	0.0125831	0.00475706	0.0304182	0.214747	58.4952	2.1516	0.190617	0.0862738	0.196195	0.0391905	54.0812	1.24472	1.41333	0.034109	0.12889
1325_001__Ap_a_02_26	26	1	14.15	55.27	79.98	26.63	4	2.26	0.52	34	68	115	1.51	0.51	0.28	0.35	3.42	3.53	1.53	0	208Pb	1	43Ca	1	43Ca	2.07	29.07	0.8488	39	-	0.00752868	0.00481853	0.0156445	0.00278537	0.000977172	0.00143039	0.126033	0.1909	45.8495	1.56405	0.129758	0.0644794	0.238229	0.0479793	54.0751	0.941366	1.45665	0.0213077	0.0656404
1325_001__Ap_a_02_26	26	2	13.79	62.23	79.98	26.63	4	2.26	0.52	34	68	115	1.51	0.51	0.28	0.35	3.42	3.53	1.53	0	208Pb	1	43Ca	1	43Ca	2.07	29.07	0.8488	39	-	0.00752868	0.00481853	0.0156445	0.00278537	0.000977172	0.00143039	0.126033	0.1909	45.8495	1.56405	0.129758	0.0644794	0.238229	0.0479793	54.0751	0.941366	1.45665	0.0213077	0.0656404
1325_001__Ap_a_02_27	27	1	14.2	70.45	75.44	11.99	4	2.43	0.46	147	60	103	1.35	1.35	1.57	2.67	0.58	0.33	0.69	0		1	43Ca	1	43Ca	7.36	28.36	0.7476	39	-	0.115481	0.00777461	0.0519215	0.00694944	0.00722245	0.00323361	0	0	51.6455	2.07788	0.22885	0.124207	1.02018	0.106001	54.069	0.776007	1.45308	0.0194921	0.570992
1325_001__Ap_a_02_27	27	2	12.99	61.69	75.44	11.99	4	2.43	0.46	147	60	103	1.35	1.35	1.57	2.67	0.58	0.33	0.69	0		1	43Ca	1	43Ca	7.36	28.36	0.7476	39	-	0.115481	0.00777461	0.0519215	0.00694944	0.00722245	0.00323361	0	0	51.6455	2.07788	0.22885	0.124207	1.02018	0.106001	54.069	0.776007	1.45308	0.0194921	0.570992
1325_001__Ap_a_02_27	27	3	14.32	47.52	75.44	11.99	4	2.43	0.46	147	60	103	1.35	1.35	1.57	2.67	0.58	0.33	0.69	0		1	43Ca	1	43Ca	7.36	28.36	0.7476	39	-	0.115481	0.00777461	0.0519215	0.00694944	0.00722245	0.00323361	0	0	51.6455	2.07788	0.22885	0.124207	1.02018	0.106001	54.069	0.776007	1.45308	0.0194921	0.570992
1325_001__Ap_a_02_28	28	1	15.09	40.11	444.29	49.96	4	2.03	0.4	30	5	87	1.59	0.84	0.81	0.87	1.42	1.22	1.08	0	206Pb	1	43Ca	1	43Ca	1.93	28.53	0.8482	39	-	0.0788412	0.00701829	0.0135344	0.00396661	0	0	0	0	51.3835	2.80525	0.284499	0.0840964	0.0758556	0.0981651	54.063	1.05916	1.46182	0.0277739	0.15136
1325_001__Ap_a_02_28	28	2	9.01	51.82	444.29	49.96	4	2.03	0.4	30	5	87	1.59	0.84	0.81	0.87	1.42	1.22	1.08	0	206Pb	1	43Ca	1	43Ca	1.93	28.53	0.8482	39	-	0.0788412	0.00701829	0.0135344	0.00396661	0	0	0	0	51.3835	2.80525	0.284499	0.0840964	0.0758556	0.0981651	54.063	1.05916	1.46182	0.0277739	0.15136
1325_001__Ap_a_02_28	28	3	14.84	79.25	444.29	49.96	4	2.03	0.4	30	5	87	1.59	0.84	0.81	0.87	1.42	1.22	1.08	0	206Pb	1	43Ca	1	43Ca	1.93	28.53	0.8482	39	-	0.0788412	0.00701829	0.0135344	0.00396661	0	0	0	0	51.3835	2.80525	0.284499	0.0840964	0.0758556	0.0981651	54.063	1.05916	1.46182	0.0277739	0.15136
1325_001__Ap_a_02_29	29	1	11.52	84.07	57.42	42.93	4	2.25	0.48	14	68	115	1.75	0.62	0.57	0.47	1.32	2.25	1	0	207Pb	1	43Ca	1	43Ca	2.65	29.23	0.8353	39	-	0.065771	0.00651903	0.016286	0.00274022	0.00355827	0.00324777	0.0180757	0.204254	50.92	1.82201	0.216335	0.0904852	0.314466	0.081201	54.057	0.515438	1.43913	0.0123343	0.118444
1325_001__Ap_a_02_29	29	2	12.09	62.25	57.42	42.93	4	2.25	0.48	14	68	115	1.75	0.62	0.57	0.47	1.32	2.25	1	0	207Pb	1	43Ca	1	43Ca	2.65	29.23	0.8353	39	-	0.065771	0.00651903	0.016286	0.00274022	0.00355827	0.00324777	0.0180757	0.204254	50.92	1.82201	0.216335	0.0904852	0.314466	0.081201	54.057	0.515438	1.43913	0.0123343	0.118444
1325_001__Ap_a_02_29	29	3	13.78	46.85	57.42	42.93	4	2.25	0.48	14	68	115	1.75	0.62	0.57	0.47	1.32	2.25	1	0	207Pb	1	43Ca	1	43Ca	2.65	29.23	0.8353	39	-	0.065771	0.00651903	0.016286	0.00274022	0.00355827	0.00324777	0.0180757	0.204254	50.92	1.82201	0.216335	0.0904852	0.314466	0.081201	54.057	0.515438	1.43913	0.0123343	0.118444
1325_001__Ap_a_02_29	29	4	14.99	31.02	57.42	42.93	4	2.25	0.48	14	68	115	1.75	0.62	0.57	0.47	1.32	2.25	1	0	207Pb	1	43Ca	1	43Ca	2.65	29.23	0.8353	39	-	0.065771	0.00651903	0.016286	0.00274022	0.00355827	0.00324777	0.0180757	0.204254	50.92	1.82201	0.216335	0.0904852	0.314466	0.081201	54.057	0.515438	1.43913	0.0123343	0.118444
1325_001__Ap_a_02_29	29	5	13.16	26.63	57.42	42.93	4	2.25	0.48	14	68	115	1.75	0.62	0.57	0.47	1.32	2.25	1	0	207Pb	1	43Ca	1	43Ca	2.65	29.23	0.8353	39	-	0.065771	0.00651903	0.016286	0.00274022	0.00355827	0.00324777	0.0180757	0.204254	50.92	1.82201	0.216335	0.0904852	0.314466	0.081201	54.057	0.515438	1.43913	0.0123343	0.118444
1325_001__Ap_a_02_30	30	1	15.22	62.7	143.89	133.61	3	2.55	0.44	7	69	75	0.46	0.85	0.47	0.58	1.79	1.8	1.13	0.01	207Pb	1	43Ca	1	43Ca	5.21	25.17	0.8453	39	-	0.0517833	0.00645258	0.0376841	0.00398816	0.00652825	0.00180889	0.0301386	0.135056	43.9076	1.08773	0.246725	0.0554394	0.125995	0.0641464	54.0509	0.622396	1.46433	0.014384	0.112933
1325_001__Ap_a_02_31	31	1	12.39	79.57	82.95	24.11	4	2.8	0.53	31	98	48	1.82	0.76	0.64	0.7	1.48	1.49	0.79	0	208Pb	1	43Ca	1	43Ca	2.12	27.27	0.8346	39	-	0.0588931	0.00822473	0.00689908	0.00211057	0.00741972	0.00207677	0	0	46.8223	1.84022	0.193999	0.0546036	0.475102	0.0808455	54.0448	0.732897	1.43565	0.0177065	0.0771346
1325_001__Ap_a_02_31	31	2	14.44	51.01	82.95	24.11	4	2.8	0.53	31	98	48	1.82	0.76	0.64	0.7	1.48	1.49	0.79	0	208Pb	1	43Ca	1	43Ca	2.12	27.27	0.8346	39	-	0.0588931	0.00822473	0.00689908	0.00211057	0.00741972	0.00207677	0	0	46.8223	1.84022	0.193999	0.0546036	0.475102	0.0808455	54.0448	0.732897	1.43565	0.0177065	0.0771346
1325_001__Ap_a_02_31	31	3	15.34	28.04	82.95	24.11	4	2.8	0.53	31	98	48	1.82	0.76	0.64	0.7	1.48	1.49	0.79	0	208Pb	1	43Ca	1	43Ca	2.12	27.27	0.8346	39	-	0.0588931	0.00822473	0.00689908	0.00211057	0.00741972	0.00207677	0	0	46.8223	1.84022	0.193999	0.0546036	0.475102	0.0808455	54.0448	0.732897	1.43565	0.0177065	0.0771346
1325_001__Ap_a_02_32	32	1	12.14	71.73	270.34	248.05	4	3.44	0.78	11	33	96	0.61	0.38	0.33	0.48	3.48	2.44	1.02	0	207Pb	1	43Ca	1	43Ca	10.78	27.73	0.7281	39	-	0.0553027	0.00746218	0.0442528	0.00841203	0.00838282	0.00238577	0	0	46.2473	0.719646	0.202546	0.109021	1.67278	0.0508476	54.0388	0.635139	1.45355	0.0172239	0.206833
1325_001__Ap_a_02_32	32	2	15.32	34.29	270.34	248.05	4	3.44	0.78	11	33	96	0.61	0.38	0.33	0.48	3.48	2.44	1.02	0	207Pb	1	43Ca	1	43Ca	10.78	27.73	0.7281	39	-	0.0553027	0.00746218	0.0442528	0.00841203	0.00838282	0.00238577	0	0	46.2473	0.719646	0.202546	0.109021	1.67278	0.0508476	54.0388	0.635139	1.45355	0.0172239	0.206833
1325_001__Ap_a_02_33	33	1	12.3	57.62	80.66	75.85	3	2.17	0.48	12	72	30	1.42	0.77	0.6	0.9	1.46	1.5	0.82	0.01	206Pb	1	43Ca	1	43Ca	3.01	28.73	0.8331	39	-	0.0286624	0.00615295	0.0121286	0.00261385	0	0	0	0	48.3737	2.32752	0.23507	0.114685	0.447705	0.0809523	54.0328	1.42215	1.46169	0.0316478	0.129658
1325_001__Ap_a_02_34	34	1	11.73	64.82	76.71	26.51	4	2.79	0.46	44	57	205	0.59	1.05	1.08	0.83	1.01	1.11	0.91	0	206Pb	1	43Ca	1	43Ca	2.22	27.42	0.7837	39	-	0.105229	0.00738829	0.0400785	0.00348219	0.0112248	0.00298368	0.123227	0.132864	44.6581	1.03316	0.222087	0.0875707	1.14485	0.0576411	54.0095	0.507921	1.45182	0.0162444	0.11614
1325_001__Ap_a_02_34	34	2	14.89	56.08	76.71	26.51	4	2.79	0.46	44	57	205	0.59	1.05	1.08	0.83	1.01	1.11	0.91	0	206Pb	1	43Ca	1	43Ca	2.22	27.42	0.7837	39	-	0.105229	0.00738829	0.0400785	0.00348219	0.0112248	0.00298368	0.123227	0.132864	44.6581	1.03316	0.222087	0.0875707	1.14485	0.0576411	54.0095	0.507921	1.45182	0.0162444	0.11614
1325_001__Ap_a_02_34	34	3	13.06	37.71	76.71	26.51	4	2.79	0.46	44	57	205	0.59	1.05	1.08	0.83	1.01	1.11	0.91	0	206Pb	1	43Ca	1	43Ca	2.22	27.42	0.7837	39	-	0.105229	0.00738829	0.0400785	0.00348219	0.0112248	0.00298368	0.123227	0.132864	44.6581	1.03316	0.222087	0.0875707	1.14485	0.0576411	54.0095	0.507921	1.45182	0.0162444	0.11614
1325_001__Ap_a_02_34	34	4	11.39	65.37	76.71	26.51	4	2.79	0.46	44	57	205	0.59	1.05	1.08	0.83	1.01	1.11	0.91	0	206Pb	1	43Ca	1	43Ca	2.22	27.42	0.7837	39	-	0.105229	0.00738829	0.0400785	0.00348219	0.0112248	0.00298368	0.123227	0.132864	44.6581	1.03316	0.222087	0.0875707	1.14485	0.0576411	54.0095	0.507921	1.45182	0.0162444	0.11614
1325_001__Ap_a_02_35	35	1	13.14	84.74	157.66	195.12	4	2.34	0.5	3	29	17	0.93	1.11	0.88	0.79	1.31	1.62	1.05	0		1	43Ca	1	43Ca	1.94	29.67	0.8561	39	-	0.0573296	0.00728453	0.0375469	0.00306673	0.00162567	0.0023013	0	0	47.9683	1.58944	0.203935	0.0661216	0.0226973	0.0489353	53.9847	1.17331	1.48889	0.0273409	0.0872582
1325_001__Ap_a_02_36	36	1	11.17	67.44	92.77	32.11	4	2.56	0.59	54	178	48	0.62	0.89	0.73	0.67	1.34	1.42	0.84	0.01	206Pb	1	43Ca	1	43Ca	3.29	30.01	0.7973	39	-	0.0573256	0.00602905	0.0286085	0.00421629	0.0263687	0.00490683	0.0707687	0.123389	45.2	0.963412	0.16994	0.0734086	0.845363	0.0802347	53.9599	0.784838	1.45111	0.0196432	0.132745
1325_001__Ap_a_02_36	36	2	13.57	53.4	92.77	32.11	4	2.56	0.59	54	178	48	0.62	0.89	0.73	0.67	1.34	1.42	0.84	0.01	206Pb	1	43Ca	1	43Ca	3.29	30.01	0.7973	39	-	0.0573256	0.00602905	0.0286085	0.00421629	0.0263687	0.00490683	0.0707687	0.123389	45.2	0.963412	0.16994	0.0734086	0.845363	0.0802347	53.9599	0.784838	1.45111	0.0196432	0.132745
1325_001__Ap_a_02_36	36	3	12.4	52.16	92.77	32.11	4	2.56	0.59	54	178	48	0.62	0.89	0.73	0.67	1.34	1.42	0.84	0.01	206Pb	1	43Ca	1	43Ca	3.29	30.01	0.7973	39	-	0.0573256	0.00602905	0.0286085	0.00421629	0.0263687	0.00490683	0.0707687	0.123389	45.2	0.963412	0.16994	0.0734086	0.845363	0.0802347	53.9599	0.784838	1.45111	0.0196432	0.132745
1325_001__Ap_a_02_36	36	4	12.51	54.84	92.77	32.11	4	2.56	0.59	54	178	48	0.62	0.89	0.73	0.67	1.34	1.42	0.84	0.01	206Pb	1	43Ca	1	43Ca	3.29	30.01	0.7973	39	-	0.0573256	0.00602905	0.0286085	0.00421629	0.0263687	0.00490683	0.0707687	0.123389	45.2	0.963412	0.16994	0.0734086	0.845363	0.0802347	53.9599	0.784838	1.45111	0.0196432	0.132745
1325_001__Ap_a_02_37	37	1	12.71	65.87	63.95	30.12	4	2.53	0.46	33	91	76	1.64	0.84	0.7	0.9	1.39	1.03	0.97	0	206Pb	1	43Ca	1	43Ca	2.71	25.34	0.8151	39	-	0.0377864	0.0055343	0.0410691	0.00475822	0.00101318	0.00123796	0	0	42.6566	1.56944	0.210687	0.0733874	0.58333	0.068709	53.9352	0.415374	1.46789	0.0124272	0.120686
1325_001__Ap_a_02_37	37	2	16.45	27.04	63.95	30.12	4	2.53	0.46	33	91	76	1.64	0.84	0.7	0.9	1.39	1.03	0.97	0	206Pb	1	43Ca	1	43Ca	2.71	25.34	0.8151	39	-	0.0377864	0.0055343	0.0410691	0.00475822	0.00101318	0.00123796	0	0	42.6566	1.56944	0.210687	0.0733874	0.58333	0.068709	53.9352	0.415374	1.46789	0.0124272	0.120686
1325_001__Ap_a_02_37	37	3	16.87	27.97	63.95	30.12	4	2.53	0.46	33	91	76	1.64	0.84	0.7	0.9	1.39	1.03	0.97	0	206Pb	1	43Ca	1	43Ca	2.71	25.34	0.8151	39	-	0.0377864	0.0055343	0.0410691	0.00475822	0.00101318	0.00123796	0	0	42.6566	1.56944	0.210687	0.0733874	0.58333	0.068709	53.9352	0.415374	1.46789	0.0124272	0.120686
1325_001__Ap_a_02_37	37	4	13.53	68.33	63.95	30.12	4	2.53	0.46	33	91	76	1.64	0.84	0.7	0.9	1.39	1.03	0.97	0	206Pb	1	43Ca	1	43Ca	2.71	25.34	0.8151	39	-	0.0377864	0.0055343	0.0410691	0.00475822	0.00101318	0.00123796	0	0	42.6566	1.56944	0.210687	0.0733874	0.58333	0.068709	53.9352	0.415374	1.46789	0.0124272	0.120686
1325_001__Ap_a_02_37	37	5	13.75	66.17	63.95	30.12	4	2.53	0.46	33	91	76	1.64	0.84	0.7	0.9	1.39	1.03	0.97	0	206Pb	1	43Ca	1	43Ca	2.71	25.34	0.8151	39	-	0.0377864	0.0055343	0.0410691	0.00475822	0.00101318	0.00123796	0	0	42.6566	1.56944	0.210687	0.0733874	0.58333	0.068709	53.9352	0.415374	1.46789	0.0124272	0.120686
1325_001__Ap_a_02_38	38	1	15.87	57.69	86.65	23.21	4	1.81	0.39	44	92	61	0.72	0.9	0.84	0.7	1.06	1.27	0.85	0	208Pb	1	43Ca	1	43Ca	1.43	32.82	0.8371	39	-	0.0685392	0.00855343	0.00844974	0.00349844	5.27777e-05	0.00410767	0.0952076	0.135185	51.1489	1.2527	0.206012	0.0603165	0.351515	0.0523805	53.9105	0.571819	1.45063	0.015252	0.11707
1325_001__Ap_a_02_38	38	2	10.41	43.96	86.65	23.21	4	1.81	0.39	44	92	61	0.72	0.9	0.84	0.7	1.06	1.27	0.85	0	208Pb	1	43Ca	1	43Ca	1.43	32.82	0.8371	39	-	0.0685392	0.00855343	0.00844974	0.00349844	5.27777e-05	0.00410767	0.0952076	0.135185	51.1489	1.2527	0.206012	0.0603165	0.351515	0.0523805	53.9105	0.571819	1.45063	0.015252	0.11707
1325_001__Ap_a_02_38	38	3	15.4	50.09	86.65	23.21	4	1.81	0.39	44	92	61	0.72	0.9	0.84	0.7	1.06	1.27	0.85	0	208Pb	1	43Ca	1	43Ca	1.43	32.82	0.8371	39	-	0.0685392	0.00855343	0.00844974	0.00349844	5.27777e-05	0.00410767	0.0952076	0.135185	51.1489	1.2527	0.206012	0.0603165	0.351515	0.0523805	53.9105	0.571819	1.45063	0.015252	0.11707
1325_001__Ap_a_02_39	39	1	13.41	49.77	170.57	175.19	4	2.43	0.79	9	34	44	1.16	0.55	0.61	0.87	2.76	1.63	1.24	0	208Pb	1	43Ca	1	43Ca	1.67	27.57	0.8492	39	-	0.0416791	0.0038258	0.0101781	0.00246021	0.000607858	0.00103416	0	0	46.7712	1.00239	0.160544	0.081211	0.192468	0.0669829	53.8858	0.690665	1.42328	0.0181259	0.0667182
1325_001__Ap_a_02_40	40	1	11.46	56.54	88.25	170.97	4	2.52	0.74	4	32	146	2.41	0.23	0.19	0.93	1.9	0.37	0.68	0		1	43Ca	1	43Ca	2.29	31.15	0.7445	39	-	0.0560405	0.00996359	0.144598	0.0121775	0.000216934	0.00233561	0	0	47.3818	1.64044	0.179724	0.109373	1.27928	0.0592391	53.8611	0.588477	1.47232	0.0141266	0.0890908
1325_001__Ap_a_02_40	40	2	10.1	45.64	88.25	170.97	4	2.52	0.74	4	32	146	2.41	0.23	0.19	0.93	1.9	0.37	0.68	0		1	43Ca	1	43Ca	2.29	31.15	0.7445	39	-	0.0560405	0.00996359	0.144598	0.0121775	0.000216934	0.00233561	0	0	47.3818	1.64044	0.179724	0.109373	1.27928	0.0592391	53.8611	0.588477	1.47232	0.0141266	0.0890908
1325_001__Ap_a_02_41	41	1	12.43	56.03	169.37	156.14	4	3.09	0.84	4	13	81	1.09	1.26	1.44	0.98	1.05	1.33	0.92	0		1	43Ca	1	43Ca	1.43	29.86	0.7719	39	-	0.0789623	0.00647054	0.156726	0.0130124	0.000621125	0.00133914	0	0	42.8047	1.23586	0.204916	0.0425148	0.851165	0.0940873	53.8364	0.824837	1.4193	0.0214964	0.182603
1325_001__Ap_a_02_41	41	2	15.72	48.59	169.37	156.14	4	3.09	0.84	4	13	81	1.09	1.26	1.44	0.98	1.05	1.33	0.92	0		1	43Ca	1	43Ca	1.43	29.86	0.7719	39	-	0.0789623	0.00647054	0.156726	0.0130124	0.000621125	0.00133914	0	0	42.8047	1.23586	0.204916	0.0425148	0.851165	0.0940873	53.8364	0.824837	1.4193	0.0214964	0.182603
1325_001__Ap_a_02_42	42	1	15.11	73.14	101.06	58.13	4	3.18	0.62	18	93	57	0.63	1.62	1.89	2	0.91	1.07	0.85	0		1	43Ca	1	43Ca	1.24	27.86	0.7734	39	-	0.0244634	0.00542109	0.0502514	0.00918265	0.0237965	0.0102893	0.0973604	0.223341	39.6972	0.912512	0.198515	0.069665	1.07691	0.05129	53.8118	0.522116	1.4337	0.0149713	0.0991577
1325_001__Ap_a_02_42	42	2	10.63	74.99	101.06	58.13	4	3.18	0.62	18	93	57	0.63	1.62	1.89	2	0.91	1.07	0.85	0		1	43Ca	1	43Ca	1.24	27.86	0.7734	39	-	0.0244634	0.00542109	0.0502514	0.00918265	0.0237965	0.0102893	0.0973604	0.223341	39.6972	0.912512	0.198515	0.069665	1.07691	0.05129	53.8118	0.522116	1.4337	0.0149713	0.0991577
mm-2-5
Spot Name	Spot Index	Track	Length	Angle to c	UPb Age (Ma)	2 sigma (Ma)	Etch Figs.	Dpar (um)	Dper (um)	[U] (ppm)	[Th] (ppm)	[Sm] (ppm)	Spike Ca	Spike 206Pb/238U	Spike 207Pb/238U	Spike 208Pb/232Th	Spike 238U/Ca	Spike 232Th/Ca	Spike 147Sm/Ca	Quality: Bkg	Quality: Bkg Iso	Quality: Q	Quality: Q Iso	Quality: Del	Quality: Del Iso	Quality: 204Pb	Quality: Mineral	rmr0	Isotopes	-	23Na wt% oxide raw	23Na wt% oxide raw 1sig	24Mg wt% oxide raw	24Mg wt% oxide raw 1sig	27Al/43Ca raw	27Al/43Ca raw 1sig	29Si/43Ca raw	29Si/43Ca raw 1sig	31P wt% oxide raw	31P wt% oxide raw 1sig	34S wt% oxide raw	34S wt% oxide raw 1sig	35Cl wt% oxide raw	35Cl wt% oxide raw 1sig	43Ca wt% oxide raw	43Ca wt% oxide raw 1sig	48Ca/43Ca raw	48Ca/43Ca raw 1sig	55Mn wt% oxide raw
1325_002__Ap_a_02_1	1	1	11.64	67.91	0	0	4	2.06	0.26	0	2	46	1.29	0.26	0.23	1.85	3.75	0.61	1.91	0	208Pb	1	43Ca	2	206Pb	4.6	23.22	0.8547	39	-	0.202949	0.0104582	0.047084	0.0299615	6.05165	0.183731	0.0201993	0.26312	32.7854	1.59922	0.252306	0.120723	0	0	54.2297	1.27729	1.53929	0.0389682	0.0170307
1325_002__Ap_a_02_2	2	1	8.77	68.78	175.32	194.19	3	2.95	1.15	3	17	62	0.66	1.43	1.28	2.3	1.3	0.88	1.19	0.01	207Pb	1	43Ca	1	43Ca	3.88	24.75	0.6812	39	-	0.10645	0.0133617	0.176905	0.0165161	0.00224241	0.00244544	0	0	27.4375	2.28382	0.205442	0.101945	1.49735	0.0578709	54.2151	1.03967	1.45391	0.0295989	0.251407
1325_002__Ap_a_02_2	2	2	9.51	77.14	175.32	194.19	3	2.95	1.15	3	17	62	0.66	1.43	1.28	2.3	1.3	0.88	1.19	0.01	207Pb	1	43Ca	1	43Ca	3.88	24.75	0.6812	39	-	0.10645	0.0133617	0.176905	0.0165161	0.00224241	0.00244544	0	0	27.4375	2.28382	0.205442	0.101945	1.49735	0.0578709	54.2151	1.03967	1.45391	0.0295989	0.251407
1325_002__Ap_a_02_3	3	1	9.83	78.12	361.55	160.09	4	3.21	1.15	5	57	132	1.76	1.04	0.79	1.26	0.87	0.82	0.71	0	208Pb	1	43Ca	1	43Ca	4.12	28.43	0.709	39	-	0.210343	0.0132761	0.218372	0.0302265	0.00350204	0.00266161	0.0307043	0.228155	38.0949	2.20618	0.288013	0.0890961	1.47386	0.0706188	54.2006	1.03466	1.46031	0.0240906	0.116819
1325_002__Ap_a_02_4	4	1	10.1	46.51	244.73	125.67	4	2.19	0.34	7	111	161	1.94	0.65	0.58	0.66	0.99	0.91	0.99	0	206Pb	1	43Ca	1	43Ca	1.89	30.76	0.8047	39	-	0.0951338	0.0109396	0.0478833	0.00511911	0.0120771	0.00274546	0.204824	0.156514	42.3619	1.95219	0.210208	0.0689804	0.393234	0.0585	54.186	0.714187	1.45607	0.0215977	0.330163
1325_002__Ap_a_02_4	4	2	14.39	65.93	244.73	125.67	4	2.19	0.34	7	111	161	1.94	0.65	0.58	0.66	0.99	0.91	0.99	0	206Pb	1	43Ca	1	43Ca	1.89	30.76	0.8047	39	-	0.0951338	0.0109396	0.0478833	0.00511911	0.0120771	0.00274546	0.204824	0.156514	42.3619	1.95219	0.210208	0.0689804	0.393234	0.0585	54.186	0.714187	1.45607	0.0215977	0.330163
1325_002__Ap_a_02_4	4	3	14.32	31.93	244.73	125.67	4	2.19	0.34	7	111	161	1.94	0.65	0.58	0.66	0.99	0.91	0.99	0	206Pb	1	43Ca	1	43Ca	1.89	30.76	0.8047	39	-	0.0951338	0.0109396	0.0478833	0.00511911	0.0120771	0.00274546	0.204824	0.156514	42.3619	1.95219	0.210208	0.0689804	0.393234	0.0585	54.186	0.714187	1.45607	0.0215977	0.330163
1325_002__Ap_a_02_5	5	1	14.17	34.12	0	0	4	3.47	0.57	8	111	171	27.36	0.11	0.06	0.04	10.06	28.07	2.45	0	206Pb	1	43Ca	1	43Ca	2.72	26.32	0.7419	39	-	0.168024	0.00936495	0.38087	0.0169549	0.0239179	0.0550695	0	0	38.6945	2.08899	0.102107	0.11214	1.10062	0.0540479	54.1715	0.535339	1.4029	0.0280876	0.153074
1325_002__Ap_a_02_6	6	1	15.02	30.32	85.43	82.13	4	2.77	0.66	11	20	120	1.64	1.01	1.08	1.36	0.83	0.69	0.84	0	207Pb	1	43Ca	1	43Ca	2.63	34.35	0.7429	39	-	0.161283	0.00901437	0.0432886	0.00893929	0.00163012	0.00224066	0	0	50.2711	2.23261	0.202091	0.0782095	1.41924	0.0327786	54.157	0.856688	1.48441	0.0241547	0.233733
1325_002__Ap_a_02_6	6	2	10.48	52.03	85.43	82.13	4	2.77	0.66	11	20	120	1.64	1.01	1.08	1.36	0.83	0.69	0.84	0	207Pb	1	43Ca	1	43Ca	2.63	34.35	0.7429	39	-	0.161283	0.00901437	0.0432886	0.00893929	0.00163012	0.00224066	0	0	50.2711	2.23261	0.202091	0.0782095	1.41924	0.0327786	54.157	0.856688	1.48441	0.0241547	0.233733
1325_002__Ap_a_02_7	7	1	15.7	51.97	94.71	19.05	4	2.86	0.77	47	172	35	1.28	1.03	1.3	1.36	1.32	1.3	0.69	0		1	43Ca	1	43Ca	1.56	25.65	0.7988	39	-	0.0998478	0.0085408	0.0104747	0.00334099	0.0215045	0.00419875	0.0372302	0.191191	40.5363	1.51128	0.254413	0.0506328	0.965982	0.0595779	54.1424	1.15307	1.44955	0.0284296	0.114622
1325_002__Ap_a_02_7	7	2	14.49	61.24	94.71	19.05	4	2.86	0.77	47	172	35	1.28	1.03	1.3	1.36	1.32	1.3	0.69	0		1	43Ca	1	43Ca	1.56	25.65	0.7988	39	-	0.0998478	0.0085408	0.0104747	0.00334099	0.0215045	0.00419875	0.0372302	0.191191	40.5363	1.51128	0.254413	0.0506328	0.965982	0.0595779	54.1424	1.15307	1.44955	0.0284296	0.114622
1325_002__Ap_a_02_7	7	3	11.33	49.02	94.71	19.05	4	2.86	0.77	47	172	35	1.28	1.03	1.3	1.36	1.32	1.3	0.69	0		1	43Ca	1	43Ca	1.56	25.65	0.7988	39	-	0.0998478	0.0085408	0.0104747	0.00334099	0.0215045	0.00419875	0.0372302	0.191191	40.5363	1.51128	0.254413	0.0506328	0.965982	0.0595779	54.1424	1.15307	1.44955	0.0284296	0.114622
1325_002__Ap_a_02_7	7	4	12.47	82.23	94.71	19.05	4	2.86	0.77	47	172	35	1.28	1.03	1.3	1.36	1.32	1.3	0.69	0		1	43Ca	1	43Ca	1.56	25.65	0.7988	39	-	0.0998478	0.0085408	0.0104747	0.00334099	0.0215045	0.00419875	0.0372302	0.191191	40.5363	1.51128	0.254413	0.0506328	0.965982	0.0595779	54.1424	1.15307	1.44955	0.0284296	0.114622
1325_002__Ap_a_02_7	7	5	13.73	56.68	94.71	19.05	4	2.86	0.77	47	172	35	1.28	1.03	1.3	1.36	1.32	1.3	0.69	0		1	43Ca	1	43Ca	1.56	25.65	0.7988	39	-	0.0998478	0.0085408	0.0104747	0.00334099	0.0215045	0.00419875	0.0372302	0.191191	40.5363	1.51128	0.254413	0.0506328	0.965982	0.0595779	54.1424	1.15307	1.44955	0.0284296	0.114622
1325_002__Ap_a_02_7	7	6	12.45	72.84	94.71	19.05	4	2.86	0.77	47	172	35	1.28	1.03	1.3	1.36	1.32	1.3	0.69	0		1	43Ca	1	43Ca	1.56	25.65	0.7988	39	-	0.0998478	0.0085408	0.0104747	0.00334099	0.0215045	0.00419875	0.0372302	0.191191	40.5363	1.51128	0.254413	0.0506328	0.965982	0.0595779	54.1424	1.15307	1.44955	0.0284296	0.114622
1325_002__Ap_a_02_7	7	7	16.22	47.57	94.71	19.05	4	2.86	0.77	47	172	35	1.28	1.03	1.3	1.36	1.32	1.3	0.69	0		1	43Ca	1	43Ca	1.56	25.65	0.7988	39	-	0.0998478	0.0085408	0.0104747	0.00334099	0.0215045	0.00419875	0.0372302	0.191191	40.5363	1.51128	0.254413	0.0506328	0.965982	0.0595779	54.1424	1.15307	1.44955	0.0284296	0.114622
1325_002__Ap_a_02_7	7	8	8.89	75.47	94.71	19.05	4	2.86	0.77	47	172	35	1.28	1.03	1.3	1.36	1.32	1.3	0.69	0		1	43Ca	1	43Ca	1.56	25.65	0.7988	39	-	0.0998478	0.0085408	0.0104747	0.00334099	0.0215045	0.00419875	0.0372302	0.191191	40.5363	1.51128	0.254413	0.0506328	0.965982	0.0595779	54.1424	1.15307	1.44955	0.0284296	0.114622
1325_002__Ap_a_02_7	7	9	15.07	84.21	94.71	19.05	4	2.86	0.77	47	172	35	1.28	1.03	1.3	1.36	1.32	1.3	0.69	0		1	43Ca	1	43Ca	1.56	25.65	0.7988	39	-	0.0998478	0.0085408	0.0104747	0.00334099	0.0215045	0.00419875	0.0372302	0.191191	40.5363	1.51128	0.254413	0.0506328	0.965982	0.0595779	54.1424	1.15307	1.44955	0.0284296	0.114622
1325_002__Ap_a_02_7	7	10	15.65	60.57	94.71	19.05	4	2.86	0.77	47	172	35	1.28	1.03	1.3	1.36	1.32	1.3	0.69	0		1	43Ca	1	43Ca	1.56	25.65	0.7988	39	-	0.0998478	0.0085408	0.0104747	0.00334099	0.0215045	0.00419875	0.0372302	0.191191	40.5363	1.51128	0.254413	0.0506328	0.965982	0.0595779	54.1424	1.15307	1.44955	0.0284296	0.114622
1325_002__Ap_a_02_7	7	11	12.7	56.51	94.71	19.05	4	2.86	0.77	47	172	35	1.28	1.03	1.3	1.36	1.32	1.3	0.69	0		1	43Ca	1	43Ca	1.56	25.65	0.7988	39	-	0.0998478	0.0085408	0.0104747	0.00334099	0.0215045	0.00419875	0.0372302	0.191191	40.5363	1.51128	0.254413	0.0506328	0.965982	0.0595779	54.1424	1.15307	1.44955	0.0284296	0.114622
1325_002__Ap_a_02_7	7	12	14	65.32	94.71	19.05	4	2.86	0.77	47	172	35	1.28	1.03	1.3	1.36	1.32	1.3	0.69	0		1	43Ca	1	43Ca	1.56	25.65	0.7988	39	-	0.0998478	0.0085408	0.0104747	0.00334099	0.0215045	0.00419875	0.0372302	0.191191	40.5363	1.51128	0.254413	0.0506328	0.965982	0.0595779	54.1424	1.15307	1.44955	0.0284296	0.114622
1325_002__Ap_a_02_7	7	13	11.28	57.97	94.71	19.05	4	2.86	0.77	47	172	35	1.28	1.03	1.3	1.36	1.32	1.3	0.69	0		1	43Ca	1	43Ca	1.56	25.65	0.7988	39	-	0.0998478	0.0085408	0.0104747	0.00334099	0.0215045	0.00419875	0.0372302	0.191191	40.5363	1.51128	0.254413	0.0506328	0.965982	0.0595779	54.1424	1.15307	1.44955	0.0284296	0.114622
1325_002__Ap_a_02_8	8	1	8.44	86.61	132.79	342.11	4	2.92	0.78	1	9	36	2.26	0.34	0.34	0.27	0.73	0.85	0.91	0	208Pb	1	43Ca	1	43Ca	1.46	27.71	0.7258	39	-	0.204617	0.0174796	0.416079	0.0212948	0.00726761	0.00137776	0	0	38.523	1.91493	0.221273	0.0744461	0.999487	0.0673245	54.1304	0.793708	1.45722	0.0197202	0.134776
1325_002__Ap_a_02_9	9	1	8.55	75.43	246.01	80.16	4	2.25	0.43	17	115	86	1.22	0.94	0.71	1.37	1.55	0.89	0.74	0	206Pb	1	43Ca	1	43Ca	1.86	24.24	0.8283	39	-	0.106647	0.0108353	0.0209099	0.00337781	0.00597253	0.00268576	0	0	31.7678	2.50246	0.257592	0.0710878	0.3552	0.0876492	54.1289	1.35709	1.43275	0.03752	0.140439
1325_002__Ap_a_02_9	9	2	12.22	66.18	246.01	80.16	4	2.25	0.43	17	115	86	1.22	0.94	0.71	1.37	1.55	0.89	0.74	0	206Pb	1	43Ca	1	43Ca	1.86	24.24	0.8283	39	-	0.106647	0.0108353	0.0209099	0.00337781	0.00597253	0.00268576	0	0	31.7678	2.50246	0.257592	0.0710878	0.3552	0.0876492	54.1289	1.35709	1.43275	0.03752	0.140439
1325_002__Ap_a_02_10	10	1	14.03	41.19	87.03	306.88	4	2.73	0.96	2	14	61	2.08	0.77	0.77	2.27	1.14	0.4	0.93	0.01	206Pb	1	43Ca	1	43Ca	2.34	27.7	0.7038	39	-	0.118905	0.0110075	0.230052	0.0151593	0.00679175	0.00493355	0	0	42.0191	1.44847	0.265693	0.0802374	1.16407	0.0249653	54.1273	0.83967	1.45871	0.02125	0.259699
1325_002__Ap_a_02_11	11	1	14.35	33.64	100.43	44.56	4	2.2	0.68	32	22	23	1.9	1	1.11	1	1.04	0.97	1.03	0	206Pb	1	43Ca	1	43Ca	2.37	30.8	0.8528	39	-	0.037821	0.00970919	0.0181757	0.00248039	0.011509	0.00184379	0.0271556	0.196287	38.6821	1.34714	0.220326	0.0484988	0.0416548	0.055946	54.1258	0.803622	1.44311	0.0201507	0.109285
1325_002__Ap_a_02_11	11	2	13.83	84.7	100.43	44.56	4	2.2	0.68	32	22	23	1.9	1	1.11	1	1.04	0.97	1.03	0	206Pb	1	43Ca	1	43Ca	2.37	30.8	0.8528	39	-	0.037821	0.00970919	0.0181757	0.00248039	0.011509	0.00184379	0.0271556	0.196287	38.6821	1.34714	0.220326	0.0484988	0.0416548	0.055946	54.1258	0.803622	1.44311	0.0201507	0.109285
1325_002__Ap_a_02_11	11	3	14.13	60.8	100.43	44.56	4	2.2	0.68	32	22	23	1.9	1	1.11	1	1.04	0.97	1.03	0	206Pb	1	43Ca	1	43Ca	2.37	30.8	0.8528	39	-	0.037821	0.00970919	0.0181757	0.00248039	0.011509	0.00184379	0.0271556	0.196287	38.6821	1.34714	0.220326	0.0484988	0.0416548	0.055946	54.1258	0.803622	1.44311	0.0201507	0.109285
1325_002__Ap_a_02_12	12	1	15.56	77.44	127.61	162.16	4	2.4	0.39	4	25	21	2.12	1.35	1.59	1.12	0.67	0.93	1.03	0	208Pb	1	43Ca	1	43Ca	2.85	30.36	0.8478	39	-	0.0402151	0.0078702	0.0301753	0.00432139	0.233132	0.0230415	0.0169618	0.188223	41.3601	2.34015	0.184806	0.0944237	0.0872005	0.0558639	54.1243	0.611822	1.43834	0.0180885	0.0495615
1325_002__Ap_a_02_12	12	2	13.69	34.01	127.61	162.16	4	2.4	0.39	4	25	21	2.12	1.35	1.59	1.12	0.67	0.93	1.03	0	208Pb	1	43Ca	1	43Ca	2.85	30.36	0.8478	39	-	0.0402151	0.0078702	0.0301753	0.00432139	0.233132	0.0230415	0.0169618	0.188223	41.3601	2.34015	0.184806	0.0944237	0.0872005	0.0558639	54.1243	0.611822	1.43834	0.0180885	0.0495615
1325_002__Ap_a_02_13	13	1	13.38	21.28	99.02	56.64	4	2.61	0.43	26	18	9	1.04	0.91	1.1	1.24	1.17	1.15	0.91	0	208Pb	1	43Ca	1	43Ca	1.94	29.23	0.8574	39	-	0.0285025	0.00547391	0.0188387	0.00422596	0.000633979	0.00239294	0	0	34.5096	2.34496	0.213244	0.0916231	0.00168349	0.0596506	54.1242	0.934349	1.44227	0.025886	0.0797327
1325_002__Ap_a_02_13	13	2	12.57	71.53	99.02	56.64	4	2.61	0.43	26	18	9	1.04	0.91	1.1	1.24	1.17	1.15	0.91	0	208Pb	1	43Ca	1	43Ca	1.94	29.23	0.8574	39	-	0.0285025	0.00547391	0.0188387	0.00422596	0.000633979	0.00239294	0	0	34.5096	2.34496	0.213244	0.0916231	0.00168349	0.0596506	54.1242	0.934349	1.44227	0.025886	0.0797327
1325_002__Ap_a_02_14	14	1	15.1	37.6	148.72	82.39	4	2.33	0.59	8	44	48	1.79	1.02	1.18	1.15	1.01	0.81	1.06	0	207Pb	1	43Ca	1	43Ca	3.01	26.82	0.8492	39	-	0.0668361	0.00765026	0.00711186	0.00237557	0.00517276	0.00247356	0	0	33.3363	2.04238	0.196369	0.0916133	0.176321	0.0582562	54.1246	0.633608	1.42437	0.0161614	0.0655468
1325_002__Ap_a_02_15	15	1	13.43	46.08	121.36	84.51	4	2.58	0.8	8	45	83	1.52	0.75	0.72	0.9	1.36	1.14	1.28	0		1	43Ca	1	43Ca	3.94	31.02	0.8095	39	-	0.0374405	0.00757492	0.0186618	0.00254016	0.00474294	0.00266418	0.0444656	0.22184	43.2563	2.08434	0.253312	0.0618677	0.740288	0.0592465	54.125	0.940034	1.46621	0.0282248	0.119307
1325_002__Ap_a_02_15	15	2	10.52	48.21	121.36	84.51	4	2.58	0.8	8	45	83	1.52	0.75	0.72	0.9	1.36	1.14	1.28	0		1	43Ca	1	43Ca	3.94	31.02	0.8095	39	-	0.0374405	0.00757492	0.0186618	0.00254016	0.00474294	0.00266418	0.0444656	0.22184	43.2563	2.08434	0.253312	0.0618677	0.740288	0.0592465	54.125	0.940034	1.46621	0.0282248	0.119307
1325_002__Ap_a_02_15	15	3	13.69	39.1	121.36	84.51	4	2.58	0.8	8	45	83	1.52	0.75	0.72	0.9	1.36	1.14	1.28	0		1	43Ca	1	43Ca	3.94	31.02	0.8095	39	-	0.0374405	0.00757492	0.0186618	0.00254016	0.00474294	0.00266418	0.0444656	0.22184	43.2563	2.08434	0.253312	0.0618677	0.740288	0.0592465	54.125	0.940034	1.46621	0.0282248	0.119307
1325_002__Ap_a_02_16	16	1	15.39	20.12	132.88	117.89	4	2.62	0.59	6	36	180	1.71	0.97	0.66	0.56	1.3	1.31	1.44	0.01	207Pb	1	43Ca	1	43Ca	1.63	21.91	0.7394	39	-	0.0422269	0.00562482	0.308488	0.0194443	0.0257544	0.00173076	0.120459	0.232377	26.7182	0.913869	0.200204	0.0841789	0.485385	0.0441604	54.1253	0.584175	1.46338	0.0135599	0.126958
1325_002__Ap_a_02_16	16	2	17.77	23.01	132.88	117.89	4	2.62	0.59	6	36	180	1.71	0.97	0.66	0.56	1.3	1.31	1.44	0.01	207Pb	1	43Ca	1	43Ca	1.63	21.91	0.7394	39	-	0.0422269	0.00562482	0.308488	0.0194443	0.0257544	0.00173076	0.120459	0.232377	26.7182	0.913869	0.200204	0.0841789	0.485385	0.0441604	54.1253	0.584175	1.46338	0.0135599	0.126958
1325_002__Ap_a_02_17	17	1	13.3	58.5	332.62	357.15	4	3.06	0.79	1	5	72	0.98	0.19	0	1.53	0.58	0.22	1.41	0		1	43Ca	1	206Pb	1.75	29.52	0.8015	39	-	0.023926	0.00845132	0.452187	0.0184785	0.00541249	0.00561278	0	0	40.4166	1.44115	0.125993	0.078077	0.359944	0.0334356	54.1257	1.00667	1.44321	0.024841	0.0477721
1325_002__Ap_a_02_18	18	1	10.22	41.54	106.13	79.3	4	2.73	0.57	10	16	79	1.57	0.72	0.54	0.67	1.71	1.62	1.11	0.02	207Pb	1	43Ca	1	43Ca	1.12	26.52	0.8319	39	-	0.0852111	0.00996997	0.01328	0.00275388	0.00294097	0.00242483	0	0	37.5869	1.57921	0.300229	0.0706398	0.431285	0.10538	54.1261	1.23776	1.50235	0.0369248	0.071642
1325_002__Ap_a_02_19	19	1	12.14	44.41	514.9	92.9	4	2.39	0.51	21	27	214	1.65	0.78	0.77	0.99	1.23	1.05	0.97	0	208Pb	1	43Ca	1	43Ca	2.5	31.3	0.8542	39	-	0.0579594	0.00753345	0.0103059	0.00224532	0	0	0	0	47.2989	2.08475	0.180659	0.0621745	0.0591714	0.0635337	54.1265	1.20272	1.44237	0.0349283	0.0459426
1325_002__Ap_a_02_20	20	1	13.57	48.82	201.61	400.72	3	2.81	0.69	2	7	73	2.09	1.07	1.32	1.08	0.74	0.73	0.75	0.01	206Pb	1	43Ca	1	43Ca	2.26	25.94	0.7553	39	-	0.0359959	0.009236	0.0470119	0.00668983	0.0087691	0.000916759	0	0	34.6104	1.93227	0.206469	0.0951818	1.10288	0.0454049	54.1268	0.880855	1.44466	0.0211778	0.0900254
1325_002__Ap_a_02_21	21	1	15.56	20.33	54.98	90.84	4	2.7	0.62	5	28	140	1.67	0.6	0.75	0.84	1.33	0.98	1	0.01	206Pb	1	43Ca	1	43Ca	2.43	28.97	0.7479	39	-	0.0445812	0.00673058	0.222158	0.0129312	0.0095146	0.00190564	0.134157	0.126986	36.4605	1.56462	0.204695	0.0585157	0.558574	0.0437089	54.1272	0.863045	1.43434	0.0240717	0.127611
1325_002__Ap_a_02_22	22	1	14.67	30.3	267.53	254.77	4	2.46	0.71	2	16	123	1.01	0.41	0.58	1.37	1.54	0.81	0.94	0.01	207Pb	1	43Ca	1	43Ca	3.72	28.54	0.7374	39	-	0.0495914	0.00653796	0.217995	0.013814	0.00366633	0.00157057	0	0	35.8478	2.10181	0.257548	0.0514355	0.619393	0.0586611	54.1276	1.20726	1.46252	0.0320908	0.122295
1325_002__Ap_a_02_22	22	2	15.03	40.95	267.53	254.77	4	2.46	0.71	2	16	123	1.01	0.41	0.58	1.37	1.54	0.81	0.94	0.01	207Pb	1	43Ca	1	43Ca	3.72	28.54	0.7374	39	-	0.0495914	0.00653796	0.217995	0.013814	0.00366633	0.00157057	0	0	35.8478	2.10181	0.257548	0.0514355	0.619393	0.0586611	54.1276	1.20726	1.46252	0.0320908	0.122295
1325_002__Ap_a_02_23	23	1	15.54	56.96	0	0	4	2.3	0.7	0	0	0	0	0	0	0	0	0	0	0	0	0	0	0	0	0	0	0.8151	39	-	0	0	0	0	0	0	0	0	0	0	0	0	0	0	0	0	0	0	0
1325_002__Ap_a_02_23	23	2	14.67	35.26	0	0	4	2.3	0.7	0	0	0	0	0	0	0	0	0	0	0	0	0	0	0	0	0	0	0.8151	39	-	0	0	0	0	0	0	0	0	0	0	0	0	0	0	0	0	0	0	0
1325_002__Ap_a_02_23	23	3	14.69	85.81	0	0	4	2.3	0.7	0	0	0	0	0	0	0	0	0	0	0	0	0	0	0	0	0	0	0.8151	39	-	0	0	0	0	0	0	0	0	0	0	0	0	0	0	0	0	0	0	0
1325_002__Ap_a_02_24	24	1	12.55	46.77	179.82	293.8	4	3.03	0.74	1	8	90	2.08	1.33	1.69	1.04	0.74	0.71	1.16	0.01	208Pb	1	43Ca	1	43Ca	5.13	23.84	0.7742	39	-	0.0906584	0.00740102	0.371976	0.0210991	0.00347182	0.00151981	0.0503607	0.230591	23.9823	1.42686	0.213716	0.0913231	0.553577	0.0672986	54.1283	0.69438	1.41743	0.0181093	0.116258
1325_002__Ap_a_02_24	24	2	15.08	76.78	179.82	293.8	4	3.03	0.74	1	8	90	2.08	1.33	1.69	1.04	0.74	0.71	1.16	0.01	208Pb	1	43Ca	1	43Ca	5.13	23.84	0.7742	39	-	0.0906584	0.00740102	0.371976	0.0210991	0.00347182	0.00151981	0.0503607	0.230591	23.9823	1.42686	0.213716	0.0913231	0.553577	0.0672986	54.1283	0.69438	1.41743	0.0181093	0.116258
1325_002__Ap_a_02_25	25	1	15.36	53.88	124.22	184.5	4	2.56	0.76	6	17	156	1.92	0.88	0.96	1.08	0.97	0.86	1.02	0		1	43Ca	1	43Ca	5.46	25.41	0.7947	39	-	0.15047	0.00920064	0.0161422	0.00336158	0.00910477	0.00183764	0	0	41.7172	1.79536	0.162127	0.0988417	0.869654	0.0724865	54.1287	0.589839	1.45777	0.0146908	0.0981185
1325_002__Ap_a_02_25	25	2	12.23	86.89	124.22	184.5	4	2.56	0.76	6	17	156	1.92	0.88	0.96	1.08	0.97	0.86	1.02	0		1	43Ca	1	43Ca	5.46	25.41	0.7947	39	-	0.15047	0.00920064	0.0161422	0.00336158	0.00910477	0.00183764	0	0	41.7172	1.79536	0.162127	0.0988417	0.869654	0.0724865	54.1287	0.589839	1.45777	0.0146908	0.0981185
1325_002__Ap_a_02_25	25	3	16.49	37.79	124.22	184.5	4	2.56	0.76	6	17	156	1.92	0.88	0.96	1.08	0.97	0.86	1.02	0		1	43Ca	1	43Ca	5.46	25.41	0.7947	39	-	0.15047	0.00920064	0.0161422	0.00336158	0.00910477	0.00183764	0	0	41.7172	1.79536	0.162127	0.0988417	0.869654	0.0724865	54.1287	0.589839	1.45777	0.0146908	0.0981185
1325_002__Ap_a_02_26	26	1	14.58	34.86	0	0	4	1.97	0.3	0	0	0	0	0	0	0	0	0	0	0	0	0	0	0	0	0	0	0.8488	39	-	0	0	0	0	0	0	0	0	0	0	0	0	0	0	0	0	0	0	0
1325_002__Ap_a_02_26	26	2	15.73	40.23	0	0	4	1.97	0.3	0	0	0	0	0	0	0	0	0	0	0	0	0	0	0	0	0	0	0.8488	39	-	0	0	0	0	0	0	0	0	0	0	0	0	0	0	0	0	0	0	0
1325_002__Ap_a_02_27	27	1	14.96	57.57	176.61	274.12	4	2.7	1.03	2	7	28	1.5	1.52	1.82	1.2	0.78	0.95	0.86	0	206Pb	1	43Ca	1	43Ca	6.52	24.66	0.7594	39	-	0.0591521	0.0133816	0.253885	0.0131131	0.00475431	0.00258848	0	0	36.746	2.34819	0.218208	0.0576089	0.706939	0.0444454	54.1119	1.08224	1.45555	0.0298683	0.139027
1325_002__Ap_a_02_28	28	1	15.47	44.41	86.14	98.16	4	1.95	0.5	6	26	169	1.77	1.02	1.38	0.97	0.7	1.01	0.97	0		1	43Ca	1	43Ca	2.8	25.75	0.8502	39	-	0.119247	0.010268	0.00702218	0.00151353	0.0115755	0.00429041	0	0	42.2743	1.55358	0.271257	0.076015	0.105106	0.0596628	54.106	0.88404	1.44368	0.0235732	0.127115
1325_002__Ap_a_02_28	28	2	11.14	43.65	86.14	98.16	4	1.95	0.5	6	26	169	1.77	1.02	1.38	0.97	0.7	1.01	0.97	0		1	43Ca	1	43Ca	2.8	25.75	0.8502	39	-	0.119247	0.010268	0.00702218	0.00151353	0.0115755	0.00429041	0	0	42.2743	1.55358	0.271257	0.076015	0.105106	0.0596628	54.106	0.88404	1.44368	0.0235732	0.127115
1325_002__Ap_a_02_28	28	3	13.39	77.36	86.14	98.16	4	1.95	0.5	6	26	169	1.77	1.02	1.38	0.97	0.7	1.01	0.97	0		1	43Ca	1	43Ca	2.8	25.75	0.8502	39	-	0.119247	0.010268	0.00702218	0.00151353	0.0115755	0.00429041	0	0	42.2743	1.55358	0.271257	0.076015	0.105106	0.0596628	54.106	0.88404	1.44368	0.0235732	0.127115
1325_002__Ap_a_02_29	29	1	16.46	51.95	82.89	25.1	4	2.36	0.61	22	43	38	2.07	1.29	1.42	1.39	0.61	0.57	0.91	0	208Pb	1	43Ca	1	43Ca	2.41	26.87	0.8235	39	-	0.00788048	0.00650401	0.0309779	0.00481355	0.212893	0.00494794	0	0	42.9065	1.30507	0.189231	0.0554566	0.541949	0.0725511	54.1002	0.504696	1.45808	0.0147208	0.0817832
1325_002__Ap_a_02_29	29	2	15.4	55.68	82.89	25.1	4	2.36	0.61	22	43	38	2.07	1.29	1.42	1.39	0.61	0.57	0.91	0	208Pb	1	43Ca	1	43Ca	2.41	26.87	0.8235	39	-	0.00788048	0.00650401	0.0309779	0.00481355	0.212893	0.00494794	0	0	42.9065	1.30507	0.189231	0.0554566	0.541949	0.0725511	54.1002	0.504696	1.45808	0.0147208	0.0817832
1325_002__Ap_a_02_30	30	1	15.45	45.69	95.87	37.87	4	2.31	0.56	25	52	35	0.34	0.98	1.12	1.17	0.96	0.91	0.94	0.01	208Pb	1	43Ca	1	43Ca	1.26	28.78	0.8216	39	-	0.047334	0.00764581	0.0172808	0.00359407	0.00305893	0.00145919	0.0418365	0.165917	43.1274	1.85512	0.22055	0.08258	0.645502	0.0234991	54.0944	0.634373	1.45452	0.0161583	0.0829157
1325_002__Ap_a_02_31	31	1	15.75	42.86	365.41	438.11	4	2.5	0.77	2	19	186	1.4	0.81	1.03	0.83	1.52	1.24	1.08	0	206Pb	1	43Ca	1	43Ca	2.28	29.49	0.787	39	-	0.252954	0.0148714	0.129841	0.00917121	0.0102601	0.00203777	0.0672222	0.180218	44.0304	2.05866	0.165284	0.0886605	0.708516	0.0496517	54.0886	0.823608	1.43975	0.0209959	0.139419
1325_002__Ap_a_02_32	32	1	13.9	53.46	111.17	109.9	4	2.86	0.54	8	68	29	1.28	1.11	1.01	1.01	1.31	1.58	0.89	0	206Pb	1	43Ca	1	43Ca	3.98	28.44	0.8517	39	-	0.0881495	0.00956284	0.00431319	0.00235176	0.00262539	0.00214462	0	0	41.066	1.75359	0.22701	0.0707899	0.121551	0.0509526	54.0828	0.621185	1.46583	0.0284862	0.0614167
1325_002__Ap_a_02_33	33	1	11.52	73.61	120.44	355.85	4	2.04	0.47	1	15	17	0.55	1.69	1.61	1.12	0.77	0.89	0.4	0	208Pb	1	43Ca	2	43Ca	3.5	27.28	0.8473	39	-	0.0738075	0.0124104	0.00565392	0.00212473	0.00185722	0.00145306	0	0	49.6957	1.30723	0.243893	0.0708605	0.18707	0.0475042	54.0769	0.669688	1.47318	0.0184433	0.111176
1325_002__Ap_a_02_34	34	1	15.47	26.92	194	248.08	2	1.92	0.35	3	15	66	1.54	1.04	1.07	1.02	1.15	1.12	1.02	0	208Pb	1	43Ca	1	43Ca	5.24	27.69	0.8144	39	-	0.0788972	0.0119106	0.0582055	0.00462513	0.00246897	0.00177039	0	0	41.6238	1.93433	0.19644	0.0639701	0.433817	0.0589421	54.0711	1.08684	1.42577	0.0242992	0.151573
1325_002__Ap_a_02_35	35	1	15.75	57.04	145.24	153.19	4	2.63	0.71	3	18	98	1.26	1.51	0.96	1.28	1.11	1.13	1	0.02	208Pb	1	43Ca	1	43Ca	2.16	29.31	0.7579	39	-	0.0496172	0.00698867	0.28207	0.0158691	0.0196555	0.0019765	0	0	50.594	1.42987	0.146402	0.0524964	0.623197	0.0831863	54.0653	0.47225	1.43799	0.0203115	0.108759
1325_002__Ap_a_02_35	35	2	14.45	51.9	145.24	153.19	4	2.63	0.71	3	18	98	1.26	1.51	0.96	1.28	1.11	1.13	1	0.02	208Pb	1	43Ca	1	43Ca	2.16	29.31	0.7579	39	-	0.0496172	0.00698867	0.28207	0.0158691	0.0196555	0.0019765	0	0	50.594	1.42987	0.146402	0.0524964	0.623197	0.0831863	54.0653	0.47225	1.43799	0.0203115	0.108759
1325_002__Ap_a_02_36	36	1	14.92	41.48	75.77	23.35	4	2.42	0.71	48	212	48	5.95	0.7	0.59	0.89	1.98	0.86	0.39	0	208Pb	1	43Ca	1	43Ca	1.73	27.32	0.8379	39	-	0.0094805	0.00665811	0.0137168	0.0069897	0.0203892	0.0501182	0.220075	0.219923	46.0781	1.80427	0.206945	0.0815421	0.310439	0.0348451	54.0595	1.52096	1.48434	0.0431873	0.0838131
1325_002__Ap_a_02_36	36	2	13.6	63.86	75.77	23.35	4	2.42	0.71	48	212	48	5.95	0.7	0.59	0.89	1.98	0.86	0.39	0	208Pb	1	43Ca	1	43Ca	1.73	27.32	0.8379	39	-	0.0094805	0.00665811	0.0137168	0.0069897	0.0203892	0.0501182	0.220075	0.219923	46.0781	1.80427	0.206945	0.0815421	0.310439	0.0348451	54.0595	1.52096	1.48434	0.0431873	0.0838131
1325_002__Ap_a_02_37	37	1	12.84	86.56	593.77	362.21	3	2.03	0.46	2	22	438	1.27	1.14	0.67	1.26	1.2	0.92	0.88	0	208Pb	1	43Ca	1	43Ca	1.14	28.37	0.799	39	-	0.0775747	0.00716196	0.0303991	0.00461636	0.0018542	0.00161968	0	0	39.892	2.6115	0.205796	0.0634263	0.48272	0.0530952	54.0537	1.6682	1.4751	0.0378856	0.115561
1325_002__Ap_a_02_38	38	1	15.2	54.32	189.99	194.04	3	2.96	1.09	3	20	60	1.91	0.93	1.11	1.08	1.03	0.86	0.8	0		1	43Ca	1	43Ca	1.8	29.17	0.7384	39	-	0.160142	0.00969827	0.168002	0.00950681	0.00540187	0.00229283	0	0	43.4537	1.72628	0.195359	0.0742206	1.1931	0.073084	54.0479	0.448076	1.42983	0.0104865	0.160662
1325_002__Ap_a_02_39	39	1	13.1	83.18	165.88	170.16	4	2.25	0.63	3	11	106	1.64	0.55	0.37	0.8	1.65	1.39	0.95	0	208Pb	1	43Ca	1	43Ca	2.36	27.45	0.824	39	-	0.0788338	0.00868014	0.0106228	0.0029571	0.00253323	0.00202231	0.133284	0.168465	43.7668	1.40929	0.191378	0.0925557	0.550466	0.0451574	54.0421	1.31133	1.43914	0.0342059	0.106103
1325_002__Ap_a_02_40	40	1	14.56	71.1	125.25	107.95	3	2.49	0.6	11	57	57	0.53	1.62	2.04	1.3	0.85	1.14	1.31	0		1	43Ca	1	206Pb	4.56	24.63	0.8372	39	-	0.0512439	0.00838938	0.0233145	0.00299466	0.0197182	0.00812933	0	0	42.0358	1.49442	0.250899	0.0698014	0.313144	0.069259	54.026	0.879535	1.43966	0.0203459	0.0709755
1325_002__Ap_a_02_40	40	2	12.25	52.94	125.25	107.95	3	2.49	0.6	11	57	57	0.53	1.62	2.04	1.3	0.85	1.14	1.31	0		1	43Ca	1	206Pb	4.56	24.63	0.8372	39	-	0.0512439	0.00838938	0.0233145	0.00299466	0.0197182	0.00812933	0	0	42.0358	1.49442	0.250899	0.0698014	0.313144	0.069259	54.026	0.879535	1.43966	0.0203459	0.0709755
1325_002__Ap_a_02_40	40	3	15.05	40.45	125.25	107.95	3	2.49	0.6	11	57	57	0.53	1.62	2.04	1.3	0.85	1.14	1.31	0		1	43Ca	1	206Pb	4.56	24.63	0.8372	39	-	0.0512439	0.00838938	0.0233145	0.00299466	0.0197182	0.00812933	0	0	42.0358	1.49442	0.250899	0.0698014	0.313144	0.069259	54.026	0.879535	1.43966	0.0203459	0.0709755
1325_002__Ap_a_02_41	41	1	12.83	56.41	120.42	76.98	4	2.43	0.72	19	52	61	1.65	1.34	1.39	1.32	0.84	1	0.84	0		1	43Ca	1	43Ca	3.03	19.89	0.8459	39	-	0.0482651	0.00709806	0.00507377	0.00272243	0.0047533	0.00257033	0	0	25.885	1.19763	0.217975	0.0684774	0.208868	0.0514289	54.0046	0.597869	1.47004	0.0170704	0.0771401
1325_002__Ap_a_02_41	41	2	14.36	18.44	120.42	76.98	4	2.43	0.72	19	52	61	1.65	1.34	1.39	1.32	0.84	1	0.84	0		1	43Ca	1	43Ca	3.03	19.89	0.8459	39	-	0.0482651	0.00709806	0.00507377	0.00272243	0.0047533	0.00257033	0	0	25.885	1.19763	0.217975	0.0684774	0.208868	0.0514289	54.0046	0.597869	1.47004	0.0170704	0.0771401
1325_002__Ap_a_02_41	41	3	12.57	60.06	120.42	76.98	4	2.43	0.72	19	52	61	1.65	1.34	1.39	1.32	0.84	1	0.84	0		1	43Ca	1	43Ca	3.03	19.89	0.8459	39	-	0.0482651	0.00709806	0.00507377	0.00272243	0.0047533	0.00257033	0	0	25.885	1.19763	0.217975	0.0684774	0.208868	0.0514289	54.0046	0.597869	1.47004	0.0170704	0.0771401
1325_002__Ap_a_02_42	42	1	14.98	74.55	138.47	267.78	4	3.48	0.89	1	4	27	2.04	0.65	0.73	1.35	1.22	0.76	0.78	0.01	207Pb	1	43Ca	1	43Ca	2.97	30.56	0.7183	39	-	0.0634599	0.00597479	0.19442	0.0128726	0.00145459	0.00260926	0.00466821	0.180575	46.4985	2.75005	0.233043	0.0779688	1.41342	0.0601966	53.9833	0.964849	1.44471	0.026467	0.197022
1325_002__Ap_a_02_42	42	2	9.74	74.07	138.47	267.78	4	3.48	0.89	1	4	27	2.04	0.65	0.73	1.35	1.22	0.76	0.78	0.01	207Pb	1	43Ca	1	43Ca	2.97	30.56	0.7183	39	-	0.0634599	0.00597479	0.19442	0.0128726	0.00145459	0.00260926	0.00466821	0.180575	46.4985	2.75005	0.233043	0.0779688	1.41342	0.0601966	53.9833	0.964849	1.44471	0.026467	0.197022
1325_002__Ap_a_02_43	43	1	13.62	53.85	526.64	55.9	3	2.12	0.47	63	11	251	2.09	0.9	0.94	1.4	0.89	0.64	1.05	0	207Pb	1	43Ca	1	43Ca	8.85	28.29	0.7841	39	-	0.0964275	0.0117566	0.0367372	0.00580159	0.0223321	0.00265441	0	0	45.429	2.19243	0.173889	0.0832111	0.046533	0.0603823	53.962	0.737721	1.46011	0.0221593	0.445424
1325_002__Ap_a_02_43	43	2	13.75	36.34	526.64	55.9	3	2.12	0.47	63	11	251	2.09	0.9	0.94	1.4	0.89	0.64	1.05	0	207Pb	1	43Ca	1	43Ca	8.85	28.29	0.7841	39	-	0.0964275	0.0117566	0.0367372	0.00580159	0.0223321	0.00265441	0	0	45.429	2.19243	0.173889	0.0832111	0.046533	0.0603823	53.962	0.737721	1.46011	0.0221593	0.445424
1325_002__Ap_a_02_44	44	1	13.87	45.55	0	0	2	2.42	0.4	0	140	93	64.81	0	0	0	0	0	0	0		1	43Ca	1	43Ca	8.02	0.95	0	39	-	0.828872	0.344504	2.42388	0.338443	58.5157	8.32895	16.9095	15.5895	2.558	4.61995	1.89351	8.86163	11.2473	5.03726	53.9407	7.86774	9.71137	1.22367	0.0780351
1325_002__Ap_a_02_45	45	1	12.64	25.46	154.24	197.53	4	2.56	0.64	8	65	194	1.37	0.28	0.22	0.63	4.75	1.55	1.02	0	208Pb	1	43Ca	1	43Ca	31.91	23.23	0.7813	39	-	0.143515	0.00860777	0.0237386	0.00295065	0.00989977	0.00230076	0	0	30.6445	1.42931	0.197852	0.0603789	0.982542	0.0361752	53.9194	0.806421	1.46144	0.0231096	0.10901
1325_002__Ap_a_02_45	45	2	14.91	40.81	154.24	197.53	4	2.56	0.64	8	65	194	1.37	0.28	0.22	0.63	4.75	1.55	1.02	0	208Pb	1	43Ca	1	43Ca	31.91	23.23	0.7813	39	-	0.143515	0.00860777	0.0237386	0.00295065	0.00989977	0.00230076	0	0	30.6445	1.42931	0.197852	0.0603789	0.982542	0.0361752	53.9194	0.806421	1.46144	0.0231096	0.10901
1325_002__Ap_a_02_46	46	1	15.05	51.88	171.85	373.22	3	2.8	0.73	2	23	91	0.75	0.75	0.88	2.56	1.16	0.88	0.8	0	206Pb	1	43Ca	1	43Ca	2.68	25.85	0.7039	39	-	0.0843557	0.0089748	0.0517538	0.00644114	0.00480158	0.00211214	0	0	35.5198	1.27748	0.138967	0.10054	1.58683	0.0474273	53.8981	0.746641	1.4754	0.0228314	0.176899
1325_002__Ap_a_02_47	47	1	14.86	9.78	146.75	129.31	4	2.22	0.64	8	100	161	7.21	1.04	0.72	0.36	1.11	4.52	6.28	0		1	43Ca	1	43Ca	1.36	25.78	0.8433	39	-	0.0909164	0.0123334	0.0300323	0.00724284	0.00425665	0.0227979	0	0	40.7454	2.07216	0.304588	0.0941442	0.185643	0.0539733	53.8768	1.43042	1.43438	0.0427511	0.110232
1325_002__Ap_a_02_48	48	1	15.26	30.45	214.17	281.11	3	2.46	0.73	2	35	149	1.28	0.71	0.91	0.85	1.27	1.27	0.91	0		1	43Ca	1	43Ca	1.45	25.72	0.8271	39	-	0.151898	0.00648281	0.0542326	0.00737513	0.00164673	0.00176563	0	0	39.7166	1.06617	0.203484	0.0718448	0.304075	0.0748112	53.8556	0.953151	1.37695	0.0264035	0.0727939
1325_002__Ap_a_02_48	48	2	11.11	79.66	214.17	281.11	3	2.46	0.73	2	35	149	1.28	0.71	0.91	0.85	1.27	1.27	0.91	0		1	43Ca	1	43Ca	1.45	25.72	0.8271	39	-	0.151898	0.00648281	0.0542326	0.00737513	0.00164673	0.00176563	0	0	39.7166	1.06617	0.203484	0.0718448	0.304075	0.0748112	53.8556	0.953151	1.37695	0.0264035	0.0727939
1325_002__Ap_a_02_49	49	1	13.31	56.13	196.31	211.03	4	3.03	0.75	3	19	103	1.32	1.12	1.83	1.03	0.91	1.16	1.23	0.01	206Pb	1	43Ca	1	43Ca	2.09	26.53	0.773	39	-	0.0557327	0.00725062	0.356842	0.0212318	0.017412	0.00388985	0	0	44.3368	1.20632	0.213418	0.072849	0.604284	0.0572904	53.8344	0.870363	1.44676	0.0200712	0.144129
1325_002__Ap_a_02_50	50	1	14.14	80.97	158.7	168.31	2	2.18	0.46	5	36	44	1.22	1.35	1.44	0.77	0.88	1.8	1.29	0	207Pb	1	43Ca	1	43Ca	5.52	25.53	0.8523	39	-	0.0301697	0.00767208	0.0138651	0.00227486	0.00437371	0.00248364	0.175177	0.286543	40.7342	1.34517	0.10853	0.0722682	0.0477483	0.04903	53.8132	0.787683	1.44608	0.0249637	0.099603
1325_002__Ap_a_02_51	51	1	13.8	28	92.26	20.26	4	2.46	0.67	44	23	22	1.39	0.81	0.91	0.61	1.33	2.14	0.52	0	207Pb	1	43Ca	1	43Ca	5.42	27.02	0.8411	39	-	0.039381	0.0049238	0.0114796	0.00243536	0.00469719	0.00176108	0.0554048	0.159602	44.0937	1.72969	0.216964	0.0742234	0.309734	0.0526699	53.792	0.914701	1.4368	0.0251966	0.0864957
1325_002__Ap_a_02_51	51	2	13.8	30.73	92.26	20.26	4	2.46	0.67	44	23	22	1.39	0.81	0.91	0.61	1.33	2.14	0.52	0	207Pb	1	43Ca	1	43Ca	5.42	27.02	0.8411	39	-	0.039381	0.0049238	0.0114796	0.00243536	0.00469719	0.00176108	0.0554048	0.159602	44.0937	1.72969	0.216964	0.0742234	0.309734	0.0526699	53.792	0.914701	1.4368	0.0251966	0.0864957
mm-2-11
Spot Name	Spot Index	Track	Length	Angle to c	UPb Age (Ma)	2 sigma (Ma)	Etch Figs.	Dpar (um)	Dper (um)	[U] (ppm)	[Th] (ppm)	[Sm] (ppm)	Spike Ca	Spike 206Pb/238U	Spike 207Pb/238U	Spike 208Pb/232Th	Spike 238U/Ca	Spike 232Th/Ca	Spike 147Sm/Ca	Quality: Bkg	Quality: Bkg Iso	Quality: Q	Quality: Q Iso	Quality: Del	Quality: Del Iso	Quality: 204Pb	Quality: Mineral	rmr0	Isotopes	-	23Na wt% oxide raw	23Na wt% oxide raw 1sig	24Mg wt% oxide raw	24Mg wt% oxide raw 1sig	27Al/43Ca raw	27Al/43Ca raw 1sig	29Si/43Ca raw	29Si/43Ca raw 1sig	31P wt% oxide raw	31P wt% oxide raw 1sig	34S wt% oxide raw	34S wt% oxide raw 1sig	35Cl wt% oxide raw	35Cl wt% oxide raw 1sig	43Ca wt% oxide raw	43Ca wt% oxide raw 1sig	48Ca/43Ca raw	48Ca/43Ca raw 1sig	55Mn wt% oxide raw
1325_003__Ap_a_02_1	1	1	12.89	66.22	0	0	4	2.19	0.38	1	161	10	93.87	0	0	0	0	0	0	0		1	43Ca	1	43Ca	84.1	33.86	0	39	-	0	0	17.9861	4.17822	337.584	78.0427	19.399	35.9814	47.8292	18.0306	10.4203	15.071	22.6216	9.09329	54.0733	17.249	5.71596	1.49137	0.659489
1325_003__Ap_a_02_2	2	1	14.36	16.82	0	0	3	2.27	0.37	0	0	0	0	0	0	0	0	0	0	0	0	0	0	0	0	0	0	0	39	-	0	0	0	0	0	0	0	0	0	0	0	0	0	0	0	0	0	0	0
1325_003__Ap_a_02_3	3	1	13.56	86.58	0	0	4	2.2	0.49	3	24	29	391.67	0	0	0	0	245.91	0	0	206Pb	1	43Ca	1	43Ca	52.74	24.05	0.839	39	-	0.0677642	0.00870878	0.00785065	0.00946852	0.103298	0.110669	0.0915427	0.153697	41.0899	1.75823	0.193919	0.0652667	0.38831	0.0354627	54.0614	0.64085	1.44186	0.019854	0.0575874
1325_003__Ap_a_02_3	3	2	14.45	70.27	0	0	4	2.2	0.49	3	24	29	391.67	0	0	0	0	245.91	0	0	206Pb	1	43Ca	1	43Ca	52.74	24.05	0.839	39	-	0.0677642	0.00870878	0.00785065	0.00946852	0.103298	0.110669	0.0915427	0.153697	41.0899	1.75823	0.193919	0.0652667	0.38831	0.0354627	54.0614	0.64085	1.44186	0.019854	0.0575874
1325_003__Ap_a_02_4	4	1	14.47	29.58	0	0	3	2.45	0.47	55	108	155	78.72	0.09	0.05	0.03	3.76	3.45	1.04	0		1	43Ca	1	43Ca	10.17	20.5	0.7907	39	-	0.0551117	0.00605347	0.0901592	0.00661273	1.42298	0.0554548	0.151287	0.268535	33.7522	1.33713	0.229718	0.0656227	0.443146	0.0580054	54.0555	0.660725	1.46613	0.0148397	0.0710586
1325_003__Ap_a_02_4	4	2	14.64	28.33	0	0	3	2.45	0.47	55	108	155	78.72	0.09	0.05	0.03	3.76	3.45	1.04	0		1	43Ca	1	43Ca	10.17	20.5	0.7907	39	-	0.0551117	0.00605347	0.0901592	0.00661273	1.42298	0.0554548	0.151287	0.268535	33.7522	1.33713	0.229718	0.0656227	0.443146	0.0580054	54.0555	0.660725	1.46613	0.0148397	0.0710586
1325_003__Ap_a_02_5	5	1	13.83	79.68	132.07	129.37	4	3.1	0.68	3	5	64	2.24	2.32	1.95	1.81	0.45	0.55	0.71	0.01	208Pb	1	43Ca	1	43Ca	2	28.95	0.8393	39	-	0.0699106	0.00776159	0.0260704	0.00318315	0.000915333	0.00104336	0	0	41.7486	2.18161	0.156462	0.0789108	0.155999	0.0445	54.0495	0.700768	1.48984	0.0169586	0.126641
1325_003__Ap_a_02_5	5	2	18	20.02	132.07	129.37	4	3.1	0.68	3	5	64	2.24	2.32	1.95	1.81	0.45	0.55	0.71	0.01	208Pb	1	43Ca	1	43Ca	2	28.95	0.8393	39	-	0.0699106	0.00776159	0.0260704	0.00318315	0.000915333	0.00104336	0	0	41.7486	2.18161	0.156462	0.0789108	0.155999	0.0445	54.0495	0.700768	1.48984	0.0169586	0.126641
1325_003__Ap_a_02_6	6	1	14.9	36.27	86.53	41.64	3	2.24	0.4	20	19	16	0.86	0.4	0.29	0.84	1.11	0.41	0.44	0	206Pb	1	43Ca	1	43Ca	2.16	29.89	0.8599	39	-	0.0183535	0.00780207	0.00803215	0.00730197	0.0151258	0.0803104	0.0953828	0.159735	47.7077	2.2037	0.287311	0.06904	0.0606676	0.0752954	54.0436	0.581818	1.48714	0.0162894	0.0381297
1325_003__Ap_a_02_7	7	1	13.48	89.58	73.83	15.45	3	2.35	0.48	52	37	94	1.53	0.63	0.66	0.36	2.03	2.94	1.69	0.01	207Pb	1	43Ca	1	43Ca	1.42	27.75	0.8572	39	-	0.0081285	0.00432843	0.00392564	0.00196167	0.000335243	0.00209454	0	0	50.7157	2.29076	0.165045	0.103923	0.133299	0.04413	54.0376	0.921216	1.46395	0.025643	0.030307
1325_003__Ap_a_02_7	7	2	13.78	47.7	73.83	15.45	3	2.35	0.48	52	37	94	1.53	0.63	0.66	0.36	2.03	2.94	1.69	0.01	207Pb	1	43Ca	1	43Ca	1.42	27.75	0.8572	39	-	0.0081285	0.00432843	0.00392564	0.00196167	0.000335243	0.00209454	0	0	50.7157	2.29076	0.165045	0.103923	0.133299	0.04413	54.0376	0.921216	1.46395	0.025643	0.030307
1325_003__Ap_a_02_7	7	3	12.89	60.65	73.83	15.45	3	2.35	0.48	52	37	94	1.53	0.63	0.66	0.36	2.03	2.94	1.69	0.01	207Pb	1	43Ca	1	43Ca	1.42	27.75	0.8572	39	-	0.0081285	0.00432843	0.00392564	0.00196167	0.000335243	0.00209454	0	0	50.7157	2.29076	0.165045	0.103923	0.133299	0.04413	54.0376	0.921216	1.46395	0.025643	0.030307
1325_003__Ap_a_02_7	7	4	13.7	80.97	73.83	15.45	3	2.35	0.48	52	37	94	1.53	0.63	0.66	0.36	2.03	2.94	1.69	0.01	207Pb	1	43Ca	1	43Ca	1.42	27.75	0.8572	39	-	0.0081285	0.00432843	0.00392564	0.00196167	0.000335243	0.00209454	0	0	50.7157	2.29076	0.165045	0.103923	0.133299	0.04413	54.0376	0.921216	1.46395	0.025643	0.030307
1325_003__Ap_a_02_8	8	1	10.85	74.01	57.85	31.93	4	2.35	0.49	31	57	171	1.43	0.71	0.97	1.2	1.4	1.1	0.93	0	208Pb	1	43Ca	1	43Ca	1.06	26.23	0.7798	39	-	0.0943697	0.00897916	0.0382294	0.00769799	0.00311021	0.00299548	0.100303	0.250502	34.041	2.78081	0.238166	0.069762	0.881135	0.0527906	54.0317	1.45071	1.43389	0.0306714	0.215015
1325_003__Ap_a_02_9	9	1	12.01	74.25	0	0	4	2.35	0.41	5	561	73	66.17	0	0	0	0	0	0	0	206Pb	1	43Ca	2	238U	10.01	28.96	0	39	-	0.785414	0.660851	0.355133	0.0899422	26.7913	5.94981	16.2325	24.1037	31.6526	6.61321	11.2116	8.58017	4.98204	3.8829	54.0258	11.4149	1.30111	0.29416	0.222944
1325_003__Ap_a_02_10	10	1	12.19	43.9	86.13	22.56	4	2.88	0.89	46	193	50	1.75	0.9	0.99	1.01	1.06	0.91	1.22	0	206Pb	1	43Ca	1	43Ca	1	27.82	0.8052	39	-	0.0599675	0.00479576	0.0146877	0.00254382	0.00766576	0.00201657	0.0494692	0.125423	48.8223	1.94933	0.152957	0.0683661	0.980443	0.0482908	54.016	0.505178	1.46171	0.0125407	0.0809932
1325_003__Ap_a_02_10	10	2	10.38	66.84	86.13	22.56	4	2.88	0.89	46	193	50	1.75	0.9	0.99	1.01	1.06	0.91	1.22	0	206Pb	1	43Ca	1	43Ca	1	27.82	0.8052	39	-	0.0599675	0.00479576	0.0146877	0.00254382	0.00766576	0.00201657	0.0494692	0.125423	48.8223	1.94933	0.152957	0.0683661	0.980443	0.0482908	54.016	0.505178	1.46171	0.0125407	0.0809932
1325_003__Ap_a_02_10	10	3	12.44	57.42	86.13	22.56	4	2.88	0.89	46	193	50	1.75	0.9	0.99	1.01	1.06	0.91	1.22	0	206Pb	1	43Ca	1	43Ca	1	27.82	0.8052	39	-	0.0599675	0.00479576	0.0146877	0.00254382	0.00766576	0.00201657	0.0494692	0.125423	48.8223	1.94933	0.152957	0.0683661	0.980443	0.0482908	54.016	0.505178	1.46171	0.0125407	0.0809932
1325_003__Ap_a_02_10	10	4	11.75	63.58	86.13	22.56	4	2.88	0.89	46	193	50	1.75	0.9	0.99	1.01	1.06	0.91	1.22	0	206Pb	1	43Ca	1	43Ca	1	27.82	0.8052	39	-	0.0599675	0.00479576	0.0146877	0.00254382	0.00766576	0.00201657	0.0494692	0.125423	48.8223	1.94933	0.152957	0.0683661	0.980443	0.0482908	54.016	0.505178	1.46171	0.0125407	0.0809932
1325_003__Ap_a_02_10	10	5	12.74	41.37	86.13	22.56	4	2.88	0.89	46	193	50	1.75	0.9	0.99	1.01	1.06	0.91	1.22	0	206Pb	1	43Ca	1	43Ca	1	27.82	0.8052	39	-	0.0599675	0.00479576	0.0146877	0.00254382	0.00766576	0.00201657	0.0494692	0.125423	48.8223	1.94933	0.152957	0.0683661	0.980443	0.0482908	54.016	0.505178	1.46171	0.0125407	0.0809932
1325_003__Ap_a_02_10	10	6	15.39	29.55	86.13	22.56	4	2.88	0.89	46	193	50	1.75	0.9	0.99	1.01	1.06	0.91	1.22	0	206Pb	1	43Ca	1	43Ca	1	27.82	0.8052	39	-	0.0599675	0.00479576	0.0146877	0.00254382	0.00766576	0.00201657	0.0494692	0.125423	48.8223	1.94933	0.152957	0.0683661	0.980443	0.0482908	54.016	0.505178	1.46171	0.0125407	0.0809932
1325_003__Ap_a_02_10	10	7	9.64	41.24	86.13	22.56	4	2.88	0.89	46	193	50	1.75	0.9	0.99	1.01	1.06	0.91	1.22	0	206Pb	1	43Ca	1	43Ca	1	27.82	0.8052	39	-	0.0599675	0.00479576	0.0146877	0.00254382	0.00766576	0.00201657	0.0494692	0.125423	48.8223	1.94933	0.152957	0.0683661	0.980443	0.0482908	54.016	0.505178	1.46171	0.0125407	0.0809932
1325_003__Ap_a_02_11	11	1	12.07	41.71	0	0	4	2.6	0.53	7	54	0	27.13	0	0	0	0	0	0	0	207Pb	1	43Ca	2	207Pb	151.08	20.09	0	39	-	0.587691	1.75549	42.9641	8.94628	295.175	57.3476	35.8349	56.9792	29.4259	20.5176	1.84412	21.3445	40.0027	16.8994	53.9866	11.1084	4.38206	0.980852	1.6612
1325_003__Ap_a_02_11	11	2	14.05	61.7	0	0	4	2.6	0.53	7	54	0	27.13	0	0	0	0	0	0	0	207Pb	1	43Ca	2	207Pb	151.08	20.09	0	39	-	0.587691	1.75549	42.9641	8.94628	295.175	57.3476	35.8349	56.9792	29.4259	20.5176	1.84412	21.3445	40.0027	16.8994	53.9866	11.1084	4.38206	0.980852	1.6612
1325_003__Ap_a_02_12	12	1	14.48	51.91	96.72	53.67	4	2.42	0.48	16	52	30	7.08	0.6	0.4	0.41	1.05	0.96	1.03	0	208Pb	1	43Ca	1	43Ca	2.89	29.2	0.8439	39	-	0.0231881	0.00879496	0.0203168	0.00244613	0.0496626	0.0084907	0.0741058	0.104862	48.3145	1.80113	0.256964	0.0453961	0.239894	0.0553241	53.9571	0.84889	1.44051	0.0210384	0.09722
1325_003__Ap_a_02_13	13	1	14.63	64.02	113.11	90.91	4	2.09	0.53	26	55	78	6.09	0.49	0.44	0.47	2.09	1.45	0.62	0	206Pb	1	43Ca	1	43Ca	4.07	22.23	0.8357	39	-	0.0228181	0.00775073	0.00685897	0.00851837	0.0174841	0.161854	0.011646	0.2578	40.7116	0.944706	0.326222	0.0990059	0.384237	0.0495172	53.9276	0.690627	1.47578	0.0204514	0.073287
1325_003__Ap_a_02_14	14	1	14.95	61.84	144.04	901.09	4	2.49	0.46	3	19	162	5.51	0.33	0.41	0.84	0.65	0.5	0.9	0	207Pb	1	43Ca	1	43Ca	3.36	27.64	0.8138	39	-	0.0985942	0.0127872	0.338377	0.0348936	0.0278296	0.0878781	0.0774819	0.27574	39.7802	3.18319	0.155856	0.0702279	0.608302	0.0589317	53.8982	0.764239	1.40852	0.0179802	0.0866287
1325_003__Ap_a_02_15	15	1	16.14	47.92	85.01	20.13	4	2.45	0.46	41	92	43	1.21	0.75	0.96	0.97	1.5	1.39	0.91	0.01	207Pb	1	43Ca	1	43Ca	1.08	28.18	0.8515	39	-	0.0434771	0.00802522	0.0104604	0.00213809	0.00100456	0.00196156	0.00611274	0.164495	46.7111	1.49063	0.208602	0.0505907	0.174156	0.0437826	53.8689	1.14031	1.44363	0.0290258	0.053291
1325_003__Ap_a_02_15	15	2	14.63	47.77	85.01	20.13	4	2.45	0.46	41	92	43	1.21	0.75	0.96	0.97	1.5	1.39	0.91	0.01	207Pb	1	43Ca	1	43Ca	1.08	28.18	0.8515	39	-	0.0434771	0.00802522	0.0104604	0.00213809	0.00100456	0.00196156	0.00611274	0.164495	46.7111	1.49063	0.208602	0.0505907	0.174156	0.0437826	53.8689	1.14031	1.44363	0.0290258	0.053291
1325_003__Ap_a_02_15	15	3	10.67	23.14	85.01	20.13	4	2.45	0.46	41	92	43	1.21	0.75	0.96	0.97	1.5	1.39	0.91	0.01	207Pb	1	43Ca	1	43Ca	1.08	28.18	0.8515	39	-	0.0434771	0.00802522	0.0104604	0.00213809	0.00100456	0.00196156	0.00611274	0.164495	46.7111	1.49063	0.208602	0.0505907	0.174156	0.0437826	53.8689	1.14031	1.44363	0.0290258	0.053291
1325_003__Ap_a_02_15	15	4	14.5	41.97	85.01	20.13	4	2.45	0.46	41	92	43	1.21	0.75	0.96	0.97	1.5	1.39	0.91	0.01	207Pb	1	43Ca	1	43Ca	1.08	28.18	0.8515	39	-	0.0434771	0.00802522	0.0104604	0.00213809	0.00100456	0.00196156	0.00611274	0.164495	46.7111	1.49063	0.208602	0.0505907	0.174156	0.0437826	53.8689	1.14031	1.44363	0.0290258	0.053291
1325_003__Ap_a_02_16	16	1	13.58	57.83	0	0	4	2.65	0.54	11	60	0	56.92	0	0	0	0	0	0	0		1	43Ca	2	43Ca	3.01	8.04	0	39	-	0	0	1.07813	0.382769	53.2022	13.1663	0	0	9.25776	6.19084	5.46176	6.82953	24.5013	8.75392	53.8396	16.9313	2.36884	0.58791	0
1325_003__Ap_a_02_16	16	2	15.06	23.46	0	0	4	2.65	0.54	11	60	0	56.92	0	0	0	0	0	0	0		1	43Ca	2	43Ca	3.01	8.04	0	39	-	0	0	1.07813	0.382769	53.2022	13.1663	0	0	9.25776	6.19084	5.46176	6.82953	24.5013	8.75392	53.8396	16.9313	2.36884	0.58791	0
1325_003__Ap_a_02_16	16	3	13.22	88.93	0	0	4	2.65	0.54	11	60	0	56.92	0	0	0	0	0	0	0		1	43Ca	2	43Ca	3.01	8.04	0	39	-	0	0	1.07813	0.382769	53.2022	13.1663	0	0	9.25776	6.19084	5.46176	6.82953	24.5013	8.75392	53.8396	16.9313	2.36884	0.58791	0
1325_003__Ap_a_02_16	16	4	12.32	77.72	0	0	4	2.65	0.54	11	60	0	56.92	0	0	0	0	0	0	0		1	43Ca	2	43Ca	3.01	8.04	0	39	-	0	0	1.07813	0.382769	53.2022	13.1663	0	0	9.25776	6.19084	5.46176	6.82953	24.5013	8.75392	53.8396	16.9313	2.36884	0.58791	0
1325_003__Ap_a_02_16	16	5	12.09	77.22	0	0	4	2.65	0.54	11	60	0	56.92	0	0	0	0	0	0	0		1	43Ca	2	43Ca	3.01	8.04	0	39	-	0	0	1.07813	0.382769	53.2022	13.1663	0	0	9.25776	6.19084	5.46176	6.82953	24.5013	8.75392	53.8396	16.9313	2.36884	0.58791	0
mm-2-20
Spot Name	Spot Index	Track	Length	Angle to c	UPb Age (Ma)	2 sigma (Ma)	Etch Figs.	Dpar (um)	Dper (um)	[U] (ppm)	[Th] (ppm)	[Sm] (ppm)	Spike Ca	Spike 206Pb/238U	Spike 207Pb/238U	Spike 208Pb/232Th	Spike 238U/Ca	Spike 232Th/Ca	Spike 147Sm/Ca	Quality: Bkg	Quality: Bkg Iso	Quality: Q	Quality: Q Iso	Quality: Del	Quality: Del Iso	Quality: 204Pb	Quality: Mineral	rmr0	Isotopes	-	23Na wt% oxide raw	23Na wt% oxide raw 1sig	24Mg wt% oxide raw	24Mg wt% oxide raw 1sig	27Al/43Ca raw	27Al/43Ca raw 1sig	29Si/43Ca raw	29Si/43Ca raw 1sig	31P wt% oxide raw	31P wt% oxide raw 1sig	34S wt% oxide raw	34S wt% oxide raw 1sig	35Cl wt% oxide raw	35Cl wt% oxide raw 1sig	43Ca wt% oxide raw	43Ca wt% oxide raw 1sig	48Ca/43Ca raw	48Ca/43Ca raw 1sig	55Mn wt% oxide raw
1325_004__Ap_a_02_1	1	1	13.85	36.13	88.16	38.09	4	2.27	0.53	30	129	70	1.76	0.54	0.35	0.36	1.14	1.08	0.89	0	208Pb	1	43Ca	1	43Ca	4.34	25.04	0.8255	39	-	0.0742066	0.00791082	0.0195288	0.00478555	0.0108647	0.00603765	0.232054	0.142732	40.2324	1.98783	0.147351	0.094722	0.5355	0.0439233	54.1145	0.565457	1.43199	0.0127112	0.0737712
1325_004__Ap_a_02_1	1	2	11.59	29.41	88.16	38.09	4	2.27	0.53	30	129	70	1.76	0.54	0.35	0.36	1.14	1.08	0.89	0	208Pb	1	43Ca	1	43Ca	4.34	25.04	0.8255	39	-	0.0742066	0.00791082	0.0195288	0.00478555	0.0108647	0.00603765	0.232054	0.142732	40.2324	1.98783	0.147351	0.094722	0.5355	0.0439233	54.1145	0.565457	1.43199	0.0127112	0.0737712
1325_004__Ap_a_02_1	1	3	12.43	50.21	88.16	38.09	4	2.27	0.53	30	129	70	1.76	0.54	0.35	0.36	1.14	1.08	0.89	0	208Pb	1	43Ca	1	43Ca	4.34	25.04	0.8255	39	-	0.0742066	0.00791082	0.0195288	0.00478555	0.0108647	0.00603765	0.232054	0.142732	40.2324	1.98783	0.147351	0.094722	0.5355	0.0439233	54.1145	0.565457	1.43199	0.0127112	0.0737712
1325_004__Ap_a_02_1	1	4	14.28	71.43	88.16	38.09	4	2.27	0.53	30	129	70	1.76	0.54	0.35	0.36	1.14	1.08	0.89	0	208Pb	1	43Ca	1	43Ca	4.34	25.04	0.8255	39	-	0.0742066	0.00791082	0.0195288	0.00478555	0.0108647	0.00603765	0.232054	0.142732	40.2324	1.98783	0.147351	0.094722	0.5355	0.0439233	54.1145	0.565457	1.43199	0.0127112	0.0737712
1325_004__Ap_a_02_1	1	5	13.51	45.39	88.16	38.09	4	2.27	0.53	30	129	70	1.76	0.54	0.35	0.36	1.14	1.08	0.89	0	208Pb	1	43Ca	1	43Ca	4.34	25.04	0.8255	39	-	0.0742066	0.00791082	0.0195288	0.00478555	0.0108647	0.00603765	0.232054	0.142732	40.2324	1.98783	0.147351	0.094722	0.5355	0.0439233	54.1145	0.565457	1.43199	0.0127112	0.0737712
1325_004__Ap_a_02_1	1	6	10.06	53.74	88.16	38.09	4	2.27	0.53	30	129	70	1.76	0.54	0.35	0.36	1.14	1.08	0.89	0	208Pb	1	43Ca	1	43Ca	4.34	25.04	0.8255	39	-	0.0742066	0.00791082	0.0195288	0.00478555	0.0108647	0.00603765	0.232054	0.142732	40.2324	1.98783	0.147351	0.094722	0.5355	0.0439233	54.1145	0.565457	1.43199	0.0127112	0.0737712
1325_004__Ap_a_02_1	1	7	12.66	31.28	88.16	38.09	4	2.27	0.53	30	129	70	1.76	0.54	0.35	0.36	1.14	1.08	0.89	0	208Pb	1	43Ca	1	43Ca	4.34	25.04	0.8255	39	-	0.0742066	0.00791082	0.0195288	0.00478555	0.0108647	0.00603765	0.232054	0.142732	40.2324	1.98783	0.147351	0.094722	0.5355	0.0439233	54.1145	0.565457	1.43199	0.0127112	0.0737712
1325_004__Ap_a_02_2	2	1	15.31	36.97	233.37	228.72	4	3.56	0.5	2	40	112	1.48	1.27	0.97	1.01	1.17	1.08	0.86	0.02	207Pb	1	43Ca	1	43Ca	5.52	26.81	0.8097	39	-	0.182133	0.0166078	0.155327	0.0123343	0.00211476	0.00241065	0.0427797	0.280413	39.7631	1.60266	0.199132	0.0935036	0.539904	0.0871236	54.1086	1.27917	1.39664	0.0333254	0.0876095
1325_004__Ap_a_02_2	2	2	9.64	69.05	233.37	228.72	4	3.56	0.5	2	40	112	1.48	1.27	0.97	1.01	1.17	1.08	0.86	0.02	207Pb	1	43Ca	1	43Ca	5.52	26.81	0.8097	39	-	0.182133	0.0166078	0.155327	0.0123343	0.00211476	0.00241065	0.0427797	0.280413	39.7631	1.60266	0.199132	0.0935036	0.539904	0.0871236	54.1086	1.27917	1.39664	0.0333254	0.0876095
1325_004__Ap_a_02_3	3	1	13.52	70.56	102.07	79.14	4	2.37	0.46	11	0	69	1.63	0.68	0.85	1.04	0.98	0.8	0.88	0		1	43Ca	1	43Ca	2.77	29.57	0.8453	39	-	0.035262	0.00718618	0.00940237	0.00363868	0.0026683	0.00164037	0	0	43.5614	1.52397	0.294024	0.0773714	0.228489	0.0565278	54.1027	0.470771	1.44107	0.0107802	0.107007
1325_004__Ap_a_02_3	3	2	10.91	62.56	102.07	79.14	4	2.37	0.46	11	0	69	1.63	0.68	0.85	1.04	0.98	0.8	0.88	0		1	43Ca	1	43Ca	2.77	29.57	0.8453	39	-	0.035262	0.00718618	0.00940237	0.00363868	0.0026683	0.00164037	0	0	43.5614	1.52397	0.294024	0.0773714	0.228489	0.0565278	54.1027	0.470771	1.44107	0.0107802	0.107007
1325_004__Ap_a_02_3	3	3	10.27	44.26	102.07	79.14	4	2.37	0.46	11	0	69	1.63	0.68	0.85	1.04	0.98	0.8	0.88	0		1	43Ca	1	43Ca	2.77	29.57	0.8453	39	-	0.035262	0.00718618	0.00940237	0.00363868	0.0026683	0.00164037	0	0	43.5614	1.52397	0.294024	0.0773714	0.228489	0.0565278	54.1027	0.470771	1.44107	0.0107802	0.107007
1325_004__Ap_a_02_3	3	4	11.7	49.74	102.07	79.14	4	2.37	0.46	11	0	69	1.63	0.68	0.85	1.04	0.98	0.8	0.88	0		1	43Ca	1	43Ca	2.77	29.57	0.8453	39	-	0.035262	0.00718618	0.00940237	0.00363868	0.0026683	0.00164037	0	0	43.5614	1.52397	0.294024	0.0773714	0.228489	0.0565278	54.1027	0.470771	1.44107	0.0107802	0.107007
1325_004__Ap_a_02_3	3	5	12.36	64.04	102.07	79.14	4	2.37	0.46	11	0	69	1.63	0.68	0.85	1.04	0.98	0.8	0.88	0		1	43Ca	1	43Ca	2.77	29.57	0.8453	39	-	0.035262	0.00718618	0.00940237	0.00363868	0.0026683	0.00164037	0	0	43.5614	1.52397	0.294024	0.0773714	0.228489	0.0565278	54.1027	0.470771	1.44107	0.0107802	0.107007
1325_004__Ap_a_02_4	4	1	16.27	2.33	108.86	77.16	4	2.26	0.51	5	39	82	1.4	1.46	0.68	1.11	1.19	1.16	1.03	0		1	43Ca	1	43Ca	2	26.86	0.842	39	-	0.0508677	0.0135943	0.00769685	0.00297387	0	0	0.233314	0.19719	43.5201	1.37758	0.166889	0.0964959	0.282854	0.0764894	54.0968	0.559786	1.44322	0.0154187	0.0933994
1325_004__Ap_a_02_4	4	2	11.37	79.28	108.86	77.16	4	2.26	0.51	5	39	82	1.4	1.46	0.68	1.11	1.19	1.16	1.03	0		1	43Ca	1	43Ca	2	26.86	0.842	39	-	0.0508677	0.0135943	0.00769685	0.00297387	0	0	0.233314	0.19719	43.5201	1.37758	0.166889	0.0964959	0.282854	0.0764894	54.0968	0.559786	1.44322	0.0154187	0.0933994
1325_004__Ap_a_02_4	4	3	13.41	42.8	108.86	77.16	4	2.26	0.51	5	39	82	1.4	1.46	0.68	1.11	1.19	1.16	1.03	0		1	43Ca	1	43Ca	2	26.86	0.842	39	-	0.0508677	0.0135943	0.00769685	0.00297387	0	0	0.233314	0.19719	43.5201	1.37758	0.166889	0.0964959	0.282854	0.0764894	54.0968	0.559786	1.44322	0.0154187	0.0933994
1325_004__Ap_a_02_4	4	4	11.15	72.12	108.86	77.16	4	2.26	0.51	5	39	82	1.4	1.46	0.68	1.11	1.19	1.16	1.03	0		1	43Ca	1	43Ca	2	26.86	0.842	39	-	0.0508677	0.0135943	0.00769685	0.00297387	0	0	0.233314	0.19719	43.5201	1.37758	0.166889	0.0964959	0.282854	0.0764894	54.0968	0.559786	1.44322	0.0154187	0.0933994
1325_004__Ap_a_02_4	4	5	12.67	64.82	108.86	77.16	4	2.26	0.51	5	39	82	1.4	1.46	0.68	1.11	1.19	1.16	1.03	0		1	43Ca	1	43Ca	2	26.86	0.842	39	-	0.0508677	0.0135943	0.00769685	0.00297387	0	0	0.233314	0.19719	43.5201	1.37758	0.166889	0.0964959	0.282854	0.0764894	54.0968	0.559786	1.44322	0.0154187	0.0933994
1325_004__Ap_a_02_4	4	6	8.17	77.18	108.86	77.16	4	2.26	0.51	5	39	82	1.4	1.46	0.68	1.11	1.19	1.16	1.03	0		1	43Ca	1	43Ca	2	26.86	0.842	39	-	0.0508677	0.0135943	0.00769685	0.00297387	0	0	0.233314	0.19719	43.5201	1.37758	0.166889	0.0964959	0.282854	0.0764894	54.0968	0.559786	1.44322	0.0154187	0.0933994
1325_004__Ap_a_02_5	5	1	12.77	45.86	204.16	187.99	4	2.19	0.39	8	42	30	14.63	0.67	0.91	0.73	2.3	1.51	2.72	0.01	207Pb	1	43Ca	1	43Ca	4.42	19.57	0.8301	39	-	0.0339494	0.00758585	0.0227	0.00321353	0.0316278	0.00561784	0.16429	0.202653	23.6774	0.406562	0.301127	0.152879	0.474876	0.0847526	54.0909	0.544245	1.45064	0.0138786	0.0558143
1325_004__Ap_a_02_6	6	1	14.3	42.74	115.08	65.88	4	2.99	0.49	10	52	150	1.99	1.01	1.45	0.98	0.93	1.15	1.12	0	208Pb	1	43Ca	1	43Ca	6.02	27.99	0.8023	39	-	0.195287	0.0135911	0.017813	0.00478799	0.0104029	0.00319725	0	0	42.4463	0.985792	0.223151	0.0689329	0.814918	0.0570417	54.0851	0.515905	1.43302	0.0109963	0.0987971
1325_004__Ap_a_02_6	6	2	13.82	41.7	115.08	65.88	4	2.99	0.49	10	52	150	1.99	1.01	1.45	0.98	0.93	1.15	1.12	0	208Pb	1	43Ca	1	43Ca	6.02	27.99	0.8023	39	-	0.195287	0.0135911	0.017813	0.00478799	0.0104029	0.00319725	0	0	42.4463	0.985792	0.223151	0.0689329	0.814918	0.0570417	54.0851	0.515905	1.43302	0.0109963	0.0987971
1325_004__Ap_a_02_6	6	3	16.83	44.06	115.08	65.88	4	2.99	0.49	10	52	150	1.99	1.01	1.45	0.98	0.93	1.15	1.12	0	208Pb	1	43Ca	1	43Ca	6.02	27.99	0.8023	39	-	0.195287	0.0135911	0.017813	0.00478799	0.0104029	0.00319725	0	0	42.4463	0.985792	0.223151	0.0689329	0.814918	0.0570417	54.0851	0.515905	1.43302	0.0109963	0.0987971
1325_004__Ap_a_02_6	6	4	13.56	80	115.08	65.88	4	2.99	0.49	10	52	150	1.99	1.01	1.45	0.98	0.93	1.15	1.12	0	208Pb	1	43Ca	1	43Ca	6.02	27.99	0.8023	39	-	0.195287	0.0135911	0.017813	0.00478799	0.0104029	0.00319725	0	0	42.4463	0.985792	0.223151	0.0689329	0.814918	0.0570417	54.0851	0.515905	1.43302	0.0109963	0.0987971
1325_004__Ap_a_02_6	6	5	12.87	76.64	115.08	65.88	4	2.99	0.49	10	52	150	1.99	1.01	1.45	0.98	0.93	1.15	1.12	0	208Pb	1	43Ca	1	43Ca	6.02	27.99	0.8023	39	-	0.195287	0.0135911	0.017813	0.00478799	0.0104029	0.00319725	0	0	42.4463	0.985792	0.223151	0.0689329	0.814918	0.0570417	54.0851	0.515905	1.43302	0.0109963	0.0987971
1325_004__Ap_a_02_7	7	1	14.14	45.31	126.76	74.25	4	2.78	0.62	8	36	70	2.05	0.78	0.79	0.89	1.07	0.9	0.92	0		1	43Ca	1	43Ca	22.05	29.79	0.786	39	-	0.0562342	0.00734519	0.0208041	0.00309074	0.00519332	0.00172206	0	0	40.7797	1.49465	0.183759	0.0728215	1.04205	0.0378514	54.0792	0.545279	1.42493	0.0134298	0.0953233
1325_004__Ap_a_02_7	7	2	13.74	34.41	126.76	74.25	4	2.78	0.62	8	36	70	2.05	0.78	0.79	0.89	1.07	0.9	0.92	0		1	43Ca	1	43Ca	22.05	29.79	0.786	39	-	0.0562342	0.00734519	0.0208041	0.00309074	0.00519332	0.00172206	0	0	40.7797	1.49465	0.183759	0.0728215	1.04205	0.0378514	54.0792	0.545279	1.42493	0.0134298	0.0953233
1325_004__Ap_a_02_8	8	1	13.72	36.02	147.11	92	4	2.72	0.43	4	29	76	1.77	0.53	0.64	0.93	1.18	0.88	1.02	0.01	208Pb	1	43Ca	1	43Ca	3.34	25.07	0.8007	39	-	0.0513252	0.00923811	0.0253922	0.00451304	0.0163841	0.00338046	0.239895	0.200807	41.5712	0.87117	0.290813	0.099759	0.85256	0.0670792	54.0733	0.433558	1.44597	0.0210208	0.167731
1325_004__Ap_a_02_8	8	2	13.69	81.83	147.11	92	4	2.72	0.43	4	29	76	1.77	0.53	0.64	0.93	1.18	0.88	1.02	0.01	208Pb	1	43Ca	1	43Ca	3.34	25.07	0.8007	39	-	0.0513252	0.00923811	0.0253922	0.00451304	0.0163841	0.00338046	0.239895	0.200807	41.5712	0.87117	0.290813	0.099759	0.85256	0.0670792	54.0733	0.433558	1.44597	0.0210208	0.167731
1325_004__Ap_a_02_8	8	3	18.27	36.05	147.11	92	4	2.72	0.43	4	29	76	1.77	0.53	0.64	0.93	1.18	0.88	1.02	0.01	208Pb	1	43Ca	1	43Ca	3.34	25.07	0.8007	39	-	0.0513252	0.00923811	0.0253922	0.00451304	0.0163841	0.00338046	0.239895	0.200807	41.5712	0.87117	0.290813	0.099759	0.85256	0.0670792	54.0733	0.433558	1.44597	0.0210208	0.167731
1325_004__Ap_a_02_9	9	1	14.06	54.16	121.34	75.79	4	2.13	0.43	9	37	28	1.99	0.73	0.81	1.31	0.79	0.64	0.72	0.01	206Pb	1	43Ca	1	43Ca	1.65	24.67	0.8483	39	-	0.0215428	0.00877787	0.00334026	0.00191515	0.000905944	0.0019791	0.105011	0.212329	37.2612	0.813933	0.230107	0.0628362	0.228975	0.0498812	54.0674	0.489962	1.46105	0.01444	0.0501614
1325_004__Ap_a_02_9	9	2	11.52	53.63	121.34	75.79	4	2.13	0.43	9	37	28	1.99	0.73	0.81	1.31	0.79	0.64	0.72	0.01	206Pb	1	43Ca	1	43Ca	1.65	24.67	0.8483	39	-	0.0215428	0.00877787	0.00334026	0.00191515	0.000905944	0.0019791	0.105011	0.212329	37.2612	0.813933	0.230107	0.0628362	0.228975	0.0498812	54.0674	0.489962	1.46105	0.01444	0.0501614
1325_004__Ap_a_02_10	10	1	14.52	67.46	65.26	77.13	4	2.35	0.41	9	30	15	1.33	1.1	1.78	4.2	0.94	0.34	0.12	0	207Pb	1	43Ca	1	43Ca	0.6	24.78	0.8525	39	-	0.0187712	0.00701359	0.0170689	0.00340937	0.00147658	0.00241872	0.0616642	0.185176	39.4228	0.983967	0.230549	0.0371771	0.164913	0.0682064	54.0615	0.99889	1.44283	0.0237375	0.0506395
1325_004__Ap_a_02_10	10	2	11.17	62.94	65.26	77.13	4	2.35	0.41	9	30	15	1.33	1.1	1.78	4.2	0.94	0.34	0.12	0	207Pb	1	43Ca	1	43Ca	0.6	24.78	0.8525	39	-	0.0187712	0.00701359	0.0170689	0.00340937	0.00147658	0.00241872	0.0616642	0.185176	39.4228	0.983967	0.230549	0.0371771	0.164913	0.0682064	54.0615	0.99889	1.44283	0.0237375	0.0506395
1325_004__Ap_a_02_10	10	3	12.81	79.03	65.26	77.13	4	2.35	0.41	9	30	15	1.33	1.1	1.78	4.2	0.94	0.34	0.12	0	207Pb	1	43Ca	1	43Ca	0.6	24.78	0.8525	39	-	0.0187712	0.00701359	0.0170689	0.00340937	0.00147658	0.00241872	0.0616642	0.185176	39.4228	0.983967	0.230549	0.0371771	0.164913	0.0682064	54.0615	0.99889	1.44283	0.0237375	0.0506395
1325_004__Ap_a_02_11	11	1	15.12	48.69	103.14	57.87	2	2.18	0.39	17	40	5	1.81	0.79	0.67	0.89	1.17	1.12	0.98	0		1	43Ca	1	43Ca	1.12	25.91	0.8565	39	-	0.105075	0.00899418	0.00795931	0.0020735	0.00161859	0.001343	0.102915	0.142913	37.6313	1.18559	0.179876	0.0837826	0.0848555	0.0566343	54.0557	0.394894	1.45374	0.0115304	0.0451309
1325_004__Ap_a_02_12	12	1	13.6	79.76	94.94	71.35	2	2.1	0.46	14	148	46	15.71	0.11	0.05	0.69	10.17	1.29	0.33	0		1	43Ca	1	43Ca	1.67	22.96	0.8131	39	-	0.034039	0.00791769	0.423655	0.0320106	1.10399	0.124862	0.129874	0.166118	36.6534	1.05383	0.30109	0.0569056	0.195217	0.0674741	54.0498	0.659827	1.49732	0.0238216	0.043138
1325_004__Ap_a_02_13	13	1	15.06	44.17	102.5	39.62	3	2.57	0.42	24	56	21	2.15	0.65	0.89	0.96	0.94	0.83	0.96	0	207Pb	1	43Ca	1	43Ca	2.89	23.76	0.8535	39	-	0.05143	0.00890257	0.00803617	0.00678124	0.0335759	0.0156951	0	0	35.68	1.15701	0.214428	0.0624914	0.122897	0.0967537	54.0439	0.531377	1.48306	0.0152259	0.0565162
1325_004__Ap_a_02_14	14	1	13.68	57.94	94.2	41.03	4	3	0.56	24	45	116	1.24	1.12	0.85	0.97	1.58	1.11	0.66	0		1	43Ca	1	43Ca	2.44	26.16	0.7748	39	-	0.171031	0.00896956	0.00808091	0.00369135	0.00130683	0.00276171	0.161333	0.150769	37.4081	1.82975	0.168294	0.104775	1.18939	0.0519218	54.0362	0.921687	1.45889	0.0231357	0.107654
1325_004__Ap_a_02_14	14	2	13.94	54.67	94.2	41.03	4	3	0.56	24	45	116	1.24	1.12	0.85	0.97	1.58	1.11	0.66	0		1	43Ca	1	43Ca	2.44	26.16	0.7748	39	-	0.171031	0.00896956	0.00808091	0.00369135	0.00130683	0.00276171	0.161333	0.150769	37.4081	1.82975	0.168294	0.104775	1.18939	0.0519218	54.0362	0.921687	1.45889	0.0231357	0.107654
1325_004__Ap_a_02_15	15	1	12.86	70.35	100.73	62	4	2.21	0.45	9	122	58	1.8	0.87	0.72	1.37	1.37	0.72	0.26	0		1	43Ca	1	43Ca	5.25	27.51	0.8475	39	-	0.042385	0.00979335	0.0359284	0.0155451	0.0592423	0.0295087	0.025944	0.113948	42.0231	1.19358	0.216462	0.0551094	0.143812	0.0718161	54.0143	0.527214	1.44179	0.0143105	0.0802552
1325_004__Ap_a_02_15	15	2	15.37	86.11	100.73	62	4	2.21	0.45	9	122	58	1.8	0.87	0.72	1.37	1.37	0.72	0.26	0		1	43Ca	1	43Ca	5.25	27.51	0.8475	39	-	0.042385	0.00979335	0.0359284	0.0155451	0.0592423	0.0295087	0.025944	0.113948	42.0231	1.19358	0.216462	0.0551094	0.143812	0.0718161	54.0143	0.527214	1.44179	0.0143105	0.0802552
1325_004__Ap_a_02_16	16	1	12.19	53.12	94.76	43.93	4	2	0.46	11	14	27	0.65	1.34	1	1.77	0.76	0.69	0.54	0.01	207Pb	1	43Ca	1	43Ca	10.46	29.34	0.8463	39	-	0.0185073	0.0060137	0.00438172	0.00332857	0.00630934	0.00198037	0.0245824	0.300309	44.1958	0.909371	0.242893	0.0904851	0.300454	0.0865537	53.9923	0.720399	1.465	0.0186156	0.0600726
1325_004__Ap_a_02_16	16	2	9.26	51.4	94.76	43.93	4	2	0.46	11	14	27	0.65	1.34	1	1.77	0.76	0.69	0.54	0.01	207Pb	1	43Ca	1	43Ca	10.46	29.34	0.8463	39	-	0.0185073	0.0060137	0.00438172	0.00332857	0.00630934	0.00198037	0.0245824	0.300309	44.1958	0.909371	0.242893	0.0904851	0.300454	0.0865537	53.9923	0.720399	1.465	0.0186156	0.0600726
1325_004__Ap_a_02_16	16	3	12.6	44.98	94.76	43.93	4	2	0.46	11	14	27	0.65	1.34	1	1.77	0.76	0.69	0.54	0.01	207Pb	1	43Ca	1	43Ca	10.46	29.34	0.8463	39	-	0.0185073	0.0060137	0.00438172	0.00332857	0.00630934	0.00198037	0.0245824	0.300309	44.1958	0.909371	0.242893	0.0904851	0.300454	0.0865537	53.9923	0.720399	1.465	0.0186156	0.0600726
1325_004__Ap_a_02_16	16	4	14.54	77.87	94.76	43.93	4	2	0.46	11	14	27	0.65	1.34	1	1.77	0.76	0.69	0.54	0.01	207Pb	1	43Ca	1	43Ca	10.46	29.34	0.8463	39	-	0.0185073	0.0060137	0.00438172	0.00332857	0.00630934	0.00198037	0.0245824	0.300309	44.1958	0.909371	0.242893	0.0904851	0.300454	0.0865537	53.9923	0.720399	1.465	0.0186156	0.0600726
1325_004__Ap_a_02_16	16	5	11.56	54.1	94.76	43.93	4	2	0.46	11	14	27	0.65	1.34	1	1.77	0.76	0.69	0.54	0.01	207Pb	1	43Ca	1	43Ca	10.46	29.34	0.8463	39	-	0.0185073	0.0060137	0.00438172	0.00332857	0.00630934	0.00198037	0.0245824	0.300309	44.1958	0.909371	0.242893	0.0904851	0.300454	0.0865537	53.9923	0.720399	1.465	0.0186156	0.0600726
1325_004__Ap_a_02_16	16	6	12.93	46.57	94.76	43.93	4	2	0.46	11	14	27	0.65	1.34	1	1.77	0.76	0.69	0.54	0.01	207Pb	1	43Ca	1	43Ca	10.46	29.34	0.8463	39	-	0.0185073	0.0060137	0.00438172	0.00332857	0.00630934	0.00198037	0.0245824	0.300309	44.1958	0.909371	0.242893	0.0904851	0.300454	0.0865537	53.9923	0.720399	1.465	0.0186156	0.0600726
1325_004__Ap_a_02_17	17	1	15.59	70.62	101.03	78.29	3	2.81	0.68	7	56	138	1.54	1.48	1.51	1.2	0.81	0.98	1.26	0	208Pb	1	43Ca	1	43Ca	11.68	27.38	0.8267	39	-	0.112263	0.0126468	0.0180464	0.00495473	0	0	0	0	40.1745	1.49278	0.256593	0.0761233	0.410045	0.0602438	53.9704	0.69705	1.4453	0.0171896	0.105275
1325_004__Ap_a_02_18	18	1	13.01	80.75	137.22	212.29	4	2.05	0.57	2	17	56	1.61	2.73	2.78	2.65	0.45	0.46	0.71	0.01	206Pb	1	43Ca	1	43Ca	5.2	28.2	0.8554	39	-	0.092893	0.00936383	0.0130638	0.0045162	0	0	0	0	38.6815	0.973748	0.219431	0.0721821	0.0174619	0.0715556	53.9485	0.450121	1.46153	0.0140524	0.0816807
1325_004__Ap_a_02_19	19	1	12.77	62.68	92.43	295.93	3	2.65	0.7	1	7	67	0.65	0.71	0.79	0.54	1.73	1.57	0.66	0.01	206Pb	1	43Ca	1	43Ca	1.58	29.97	0.7643	39	-	0.0787776	0.0106584	0.527783	0.0251164	0.0153695	0.00232697	0	0	41.6112	0.833538	0.192257	0.0844978	0.557744	0.0809703	53.9265	0.569109	1.46956	0.0166306	0.0992793
1325_004__Ap_a_02_20	20	1	14.25	37.18	96.01	153.88	4	2.54	0.52	5	24	14	0.9	0.93	0.67	0.91	1.17	1.22	0.57	0	206Pb	1	43Ca	1	43Ca	1.47	26.26	0.8371	39	-	0.0352403	0.00605666	0.0384703	0.00363132	0.00356356	0.00268361	0	0	39.6283	1.0715	0.247755	0.0862689	0.315123	0.0513882	53.9047	0.735178	1.48596	0.0217477	0.0882384
1325_004__Ap_a_02_20	20	2	14.23	45.34	96.01	153.88	4	2.54	0.52	5	24	14	0.9	0.93	0.67	0.91	1.17	1.22	0.57	0	206Pb	1	43Ca	1	43Ca	1.47	26.26	0.8371	39	-	0.0352403	0.00605666	0.0384703	0.00363132	0.00356356	0.00268361	0	0	39.6283	1.0715	0.247755	0.0862689	0.315123	0.0513882	53.9047	0.735178	1.48596	0.0217477	0.0882384
1325_004__Ap_a_02_20	20	3	13.72	50.41	96.01	153.88	4	2.54	0.52	5	24	14	0.9	0.93	0.67	0.91	1.17	1.22	0.57	0	206Pb	1	43Ca	1	43Ca	1.47	26.26	0.8371	39	-	0.0352403	0.00605666	0.0384703	0.00363132	0.00356356	0.00268361	0	0	39.6283	1.0715	0.247755	0.0862689	0.315123	0.0513882	53.9047	0.735178	1.48596	0.0217477	0.0882384
1325_004__Ap_a_02_20	20	4	15.3	19.9	96.01	153.88	4	2.54	0.52	5	24	14	0.9	0.93	0.67	0.91	1.17	1.22	0.57	0	206Pb	1	43Ca	1	43Ca	1.47	26.26	0.8371	39	-	0.0352403	0.00605666	0.0384703	0.00363132	0.00356356	0.00268361	0	0	39.6283	1.0715	0.247755	0.0862689	0.315123	0.0513882	53.9047	0.735178	1.48596	0.0217477	0.0882384
1325_004__Ap_a_02_20	20	5	12.37	63.37	96.01	153.88	4	2.54	0.52	5	24	14	0.9	0.93	0.67	0.91	1.17	1.22	0.57	0	206Pb	1	43Ca	1	43Ca	1.47	26.26	0.8371	39	-	0.0352403	0.00605666	0.0384703	0.00363132	0.00356356	0.00268361	0	0	39.6283	1.0715	0.247755	0.0862689	0.315123	0.0513882	53.9047	0.735178	1.48596	0.0217477	0.0882384
1325_004__Ap_a_02_20	20	6	14	41.18	96.01	153.88	4	2.54	0.52	5	24	14	0.9	0.93	0.67	0.91	1.17	1.22	0.57	0	206Pb	1	43Ca	1	43Ca	1.47	26.26	0.8371	39	-	0.0352403	0.00605666	0.0384703	0.00363132	0.00356356	0.00268361	0	0	39.6283	1.0715	0.247755	0.0862689	0.315123	0.0513882	53.9047	0.735178	1.48596	0.0217477	0.0882384
1325_004__Ap_a_02_20	20	7	12.45	64.15	96.01	153.88	4	2.54	0.52	5	24	14	0.9	0.93	0.67	0.91	1.17	1.22	0.57	0	206Pb	1	43Ca	1	43Ca	1.47	26.26	0.8371	39	-	0.0352403	0.00605666	0.0384703	0.00363132	0.00356356	0.00268361	0	0	39.6283	1.0715	0.247755	0.0862689	0.315123	0.0513882	53.9047	0.735178	1.48596	0.0217477	0.0882384
1325_004__Ap_a_02_21	21	1	13.46	25.9	186.48	232.19	3	2.74	0.72	3	22	91	1.6	1.09	1.35	1.17	0.73	0.92	1.21	0.02	207Pb	1	43Ca	1	43Ca	1.69	25.65	0.7983	39	-	0.0210743	0.010012	0.0512445	0.00646332	0.0178584	0.00313702	0.311811	0.238639	39.9676	1.36694	0.186519	0.11762	0.433526	0.0511168	53.8828	1.05718	1.44262	0.0246657	0.103752
1325_004__Ap_a_02_21	21	2	15.03	45.27	186.48	232.19	3	2.74	0.72	3	22	91	1.6	1.09	1.35	1.17	0.73	0.92	1.21	0.02	207Pb	1	43Ca	1	43Ca	1.69	25.65	0.7983	39	-	0.0210743	0.010012	0.0512445	0.00646332	0.0178584	0.00313702	0.311811	0.238639	39.9676	1.36694	0.186519	0.11762	0.433526	0.0511168	53.8828	1.05718	1.44262	0.0246657	0.103752
1325_004__Ap_a_02_21	21	3	14.05	48.01	186.48	232.19	3	2.74	0.72	3	22	91	1.6	1.09	1.35	1.17	0.73	0.92	1.21	0.02	207Pb	1	43Ca	1	43Ca	1.69	25.65	0.7983	39	-	0.0210743	0.010012	0.0512445	0.00646332	0.0178584	0.00313702	0.311811	0.238639	39.9676	1.36694	0.186519	0.11762	0.433526	0.0511168	53.8828	1.05718	1.44262	0.0246657	0.103752
1325_004__Ap_a_02_22	22	1	14.8	33.14	101.31	81.25	4	2.4	0.42	10	71	19	1.84	1.08	0.99	1.19	0.8	0.99	1.1	0	208Pb	1	43Ca	1	43Ca	2.12	26.3	0.843	39	-	0.0497584	0.00490457	0.0285771	0.00250296	0.00161956	0.00186954	0	0	36.2496	1.44648	0.236451	0.0811811	0.27394	0.0453855	53.8609	0.679019	1.49163	0.0167367	0.0569129
1325_004__Ap_a_02_22	22	2	14.57	84.46	101.31	81.25	4	2.4	0.42	10	71	19	1.84	1.08	0.99	1.19	0.8	0.99	1.1	0	208Pb	1	43Ca	1	43Ca	2.12	26.3	0.843	39	-	0.0497584	0.00490457	0.0285771	0.00250296	0.00161956	0.00186954	0	0	36.2496	1.44648	0.236451	0.0811811	0.27394	0.0453855	53.8609	0.679019	1.49163	0.0167367	0.0569129
1325_004__Ap_a_02_22	22	3	15.9	36.77	101.31	81.25	4	2.4	0.42	10	71	19	1.84	1.08	0.99	1.19	0.8	0.99	1.1	0	208Pb	1	43Ca	1	43Ca	2.12	26.3	0.843	39	-	0.0497584	0.00490457	0.0285771	0.00250296	0.00161956	0.00186954	0	0	36.2496	1.44648	0.236451	0.0811811	0.27394	0.0453855	53.8609	0.679019	1.49163	0.0167367	0.0569129
1325_004__Ap_a_02_23	23	1	15.03	42.47	63.4	36.03	4	2.87	0.74	21	163	148	1.44	0.82	0.83	1.04	1.28	1.11	1.34	0		1	43Ca	1	43Ca	1.82	27.47	0.7751	39	-	0.0488175	0.0101051	0.0777	0.0114218	0.00251841	0.00174229	0.0595728	0.195401	40.5684	1.11155	0.199156	0.0706196	1.08014	0.0632189	53.8391	0.8621	1.44372	0.0258136	0.0666299
1325_004__Ap_a_02_23	23	2	12.76	57.12	63.4	36.03	4	2.87	0.74	21	163	148	1.44	0.82	0.83	1.04	1.28	1.11	1.34	0		1	43Ca	1	43Ca	1.82	27.47	0.7751	39	-	0.0488175	0.0101051	0.0777	0.0114218	0.00251841	0.00174229	0.0595728	0.195401	40.5684	1.11155	0.199156	0.0706196	1.08014	0.0632189	53.8391	0.8621	1.44372	0.0258136	0.0666299
1325_004__Ap_a_02_23	23	3	17.25	21.87	63.4	36.03	4	2.87	0.74	21	163	148	1.44	0.82	0.83	1.04	1.28	1.11	1.34	0		1	43Ca	1	43Ca	1.82	27.47	0.7751	39	-	0.0488175	0.0101051	0.0777	0.0114218	0.00251841	0.00174229	0.0595728	0.195401	40.5684	1.11155	0.199156	0.0706196	1.08014	0.0632189	53.8391	0.8621	1.44372	0.0258136	0.0666299
1325_004__Ap_a_02_23	23	4	16.79	46.01	63.4	36.03	4	2.87	0.74	21	163	148	1.44	0.82	0.83	1.04	1.28	1.11	1.34	0		1	43Ca	1	43Ca	1.82	27.47	0.7751	39	-	0.0488175	0.0101051	0.0777	0.0114218	0.00251841	0.00174229	0.0595728	0.195401	40.5684	1.11155	0.199156	0.0706196	1.08014	0.0632189	53.8391	0.8621	1.44372	0.0258136	0.0666299
1325_004__Ap_a_02_23	23	5	14.5	55.52	63.4	36.03	4	2.87	0.74	21	163	148	1.44	0.82	0.83	1.04	1.28	1.11	1.34	0		1	43Ca	1	43Ca	1.82	27.47	0.7751	39	-	0.0488175	0.0101051	0.0777	0.0114218	0.00251841	0.00174229	0.0595728	0.195401	40.5684	1.11155	0.199156	0.0706196	1.08014	0.0632189	53.8391	0.8621	1.44372	0.0258136	0.0666299
1325_004__Ap_a_02_24	24	1	16.61	89.97	66.65	230.08	4	2.54	0.76	2	9	51	2.19	0.61	0.67	0.42	1.23	1.78	1.15	0		1	43Ca	1	43Ca	1.75	29.78	0.8096	39	-	0.0819747	0.0100418	0.183011	0.0142657	0.00024091	0.00206837	0	0	44.8785	1.42888	0.219407	0.0613402	0.475691	0.0517757	53.8173	0.670409	1.40768	0.0169014	0.0945778
1325_004__Ap_a_02_24	24	2	15.65	27.43	66.65	230.08	4	2.54	0.76	2	9	51	2.19	0.61	0.67	0.42	1.23	1.78	1.15	0		1	43Ca	1	43Ca	1.75	29.78	0.8096	39	-	0.0819747	0.0100418	0.183011	0.0142657	0.00024091	0.00206837	0	0	44.8785	1.42888	0.219407	0.0613402	0.475691	0.0517757	53.8173	0.670409	1.40768	0.0169014	0.0945778
1325_004__Ap_a_02_24	24	3	13.84	45.47	66.65	230.08	4	2.54	0.76	2	9	51	2.19	0.61	0.67	0.42	1.23	1.78	1.15	0		1	43Ca	1	43Ca	1.75	29.78	0.8096	39	-	0.0819747	0.0100418	0.183011	0.0142657	0.00024091	0.00206837	0	0	44.8785	1.42888	0.219407	0.0613402	0.475691	0.0517757	53.8173	0.670409	1.40768	0.0169014	0.0945778
1325_004__Ap_a_02_25	25	1	14.05	45.46	124.77	87.78	4	2.02	0.43	9	34	138	1.92	0.87	0.94	0.96	1.02	0.93	1.29	0.01	207Pb	1	43Ca	1	43Ca	5.86	24.36	0.8537	39	-	0.0230038	0.00587962	0.0223433	0.00279361	7.91492e-05	0.00147716	0	0	39.6278	0.940096	0.162597	0.0819445	0.111173	0.0602085	53.7955	0.518333	1.48689	0.0124307	0.0443074
1325_004__Ap_a_02_26	26	1	15.52	37.15	99.55	23.85	4	2.07	0.51	38	143	67	0.55	1.25	0.83	1.28	0.86	0.83	0.75	0	208Pb	1	43Ca	1	43Ca	2.25	23.61	0.8485	39	-	0.0406994	0.00530929	0.00621223	0.00319421	0.00148606	0.00094843	0	0	46.1099	1.57063	0.229517	0.0884121	0.20227	0.0579044	54.111	0.623545	1.46602	0.0148463	0.047089
1325_004__Ap_a_02_26	26	2	12.77	59.16	99.55	23.85	4	2.07	0.51	38	143	67	0.55	1.25	0.83	1.28	0.86	0.83	0.75	0	208Pb	1	43Ca	1	43Ca	2.25	23.61	0.8485	39	-	0.0406994	0.00530929	0.00621223	0.00319421	0.00148606	0.00094843	0	0	46.1099	1.57063	0.229517	0.0884121	0.20227	0.0579044	54.111	0.623545	1.46602	0.0148463	0.047089
1325_004__Ap_a_02_26	26	3	13.31	64.08	99.55	23.85	4	2.07	0.51	38	143	67	0.55	1.25	0.83	1.28	0.86	0.83	0.75	0	208Pb	1	43Ca	1	43Ca	2.25	23.61	0.8485	39	-	0.0406994	0.00530929	0.00621223	0.00319421	0.00148606	0.00094843	0	0	46.1099	1.57063	0.229517	0.0884121	0.20227	0.0579044	54.111	0.623545	1.46602	0.0148463	0.047089
1325_004__Ap_a_02_26	26	4	15.53	21.58	99.55	23.85	4	2.07	0.51	38	143	67	0.55	1.25	0.83	1.28	0.86	0.83	0.75	0	208Pb	1	43Ca	1	43Ca	2.25	23.61	0.8485	39	-	0.0406994	0.00530929	0.00621223	0.00319421	0.00148606	0.00094843	0	0	46.1099	1.57063	0.229517	0.0884121	0.20227	0.0579044	54.111	0.623545	1.46602	0.0148463	0.047089
1325_004__Ap_a_02_26	26	5	11.92	45.3	99.55	23.85	4	2.07	0.51	38	143	67	0.55	1.25	0.83	1.28	0.86	0.83	0.75	0	208Pb	1	43Ca	1	43Ca	2.25	23.61	0.8485	39	-	0.0406994	0.00530929	0.00621223	0.00319421	0.00148606	0.00094843	0	0	46.1099	1.57063	0.229517	0.0884121	0.20227	0.0579044	54.111	0.623545	1.46602	0.0148463	0.047089
1325_004__Ap_a_02_26	26	6	12.84	62.56	99.55	23.85	4	2.07	0.51	38	143	67	0.55	1.25	0.83	1.28	0.86	0.83	0.75	0	208Pb	1	43Ca	1	43Ca	2.25	23.61	0.8485	39	-	0.0406994	0.00530929	0.00621223	0.00319421	0.00148606	0.00094843	0	0	46.1099	1.57063	0.229517	0.0884121	0.20227	0.0579044	54.111	0.623545	1.46602	0.0148463	0.047089
1325_004__Ap_a_02_26	26	7	12.99	41.05	99.55	23.85	4	2.07	0.51	38	143	67	0.55	1.25	0.83	1.28	0.86	0.83	0.75	0	208Pb	1	43Ca	1	43Ca	2.25	23.61	0.8485	39	-	0.0406994	0.00530929	0.00621223	0.00319421	0.00148606	0.00094843	0	0	46.1099	1.57063	0.229517	0.0884121	0.20227	0.0579044	54.111	0.623545	1.46602	0.0148463	0.047089
1325_004__Ap_a_02_27	27	1	13.27	71.98	233.73	455.45	4	2.06	0.38	2	10	78	1.15	1.05	1.14	0.6	1.27	2.01	1.18	0.01	206Pb	1	43Ca	1	43Ca	0.8	24.08	0.845	39	-	0.083769	0.00834581	0.0435629	0.00721107	0.00228612	0.00205882	0.0285514	0.231836	50.1653	1.82589	0.223769	0.102719	0.0902168	0.0647321	54.1051	1.15629	1.43355	0.0276475	0.0807736
1325_004__Ap_a_02_27	27	2	16.44	76.62	233.73	455.45	4	2.06	0.38	2	10	78	1.15	1.05	1.14	0.6	1.27	2.01	1.18	0.01	206Pb	1	43Ca	1	43Ca	0.8	24.08	0.845	39	-	0.083769	0.00834581	0.0435629	0.00721107	0.00228612	0.00205882	0.0285514	0.231836	50.1653	1.82589	0.223769	0.102719	0.0902168	0.0647321	54.1051	1.15629	1.43355	0.0276475	0.0807736
1325_004__Ap_a_02_28	28	1	12.47	61.82	83.33	112.61	4	2.78	1.02	5	14	76	1.67	1.74	2.55	0.98	0.37	0.77	1.44	0		1	43Ca	1	43Ca	1.47	24.45	0.8506	39	-	0.0678525	0.0084572	0.0333935	0.00612953	0.0031543	0.00150298	0.0710621	0.183168	48.8658	1.37648	0.179876	0.066708	0.0452048	0.0450746	54.0992	0.607727	1.42891	0.0147894	0.0737696
1325_004__Ap_a_02_28	28	2	12.73	74.12	83.33	112.61	4	2.78	1.02	5	14	76	1.67	1.74	2.55	0.98	0.37	0.77	1.44	0		1	43Ca	1	43Ca	1.47	24.45	0.8506	39	-	0.0678525	0.0084572	0.0333935	0.00612953	0.0031543	0.00150298	0.0710621	0.183168	48.8658	1.37648	0.179876	0.066708	0.0452048	0.0450746	54.0992	0.607727	1.42891	0.0147894	0.0737696
1325_004__Ap_a_02_28	28	3	13.83	45.95	83.33	112.61	4	2.78	1.02	5	14	76	1.67	1.74	2.55	0.98	0.37	0.77	1.44	0		1	43Ca	1	43Ca	1.47	24.45	0.8506	39	-	0.0678525	0.0084572	0.0333935	0.00612953	0.0031543	0.00150298	0.0710621	0.183168	48.8658	1.37648	0.179876	0.066708	0.0452048	0.0450746	54.0992	0.607727	1.42891	0.0147894	0.0737696
1325_004__Ap_a_02_28	28	4	16.43	24.27	83.33	112.61	4	2.78	1.02	5	14	76	1.67	1.74	2.55	0.98	0.37	0.77	1.44	0		1	43Ca	1	43Ca	1.47	24.45	0.8506	39	-	0.0678525	0.0084572	0.0333935	0.00612953	0.0031543	0.00150298	0.0710621	0.183168	48.8658	1.37648	0.179876	0.066708	0.0452048	0.0450746	54.0992	0.607727	1.42891	0.0147894	0.0737696
1325_004__Ap_a_02_28	28	5	9.13	88.95	83.33	112.61	4	2.78	1.02	5	14	76	1.67	1.74	2.55	0.98	0.37	0.77	1.44	0		1	43Ca	1	43Ca	1.47	24.45	0.8506	39	-	0.0678525	0.0084572	0.0333935	0.00612953	0.0031543	0.00150298	0.0710621	0.183168	48.8658	1.37648	0.179876	0.066708	0.0452048	0.0450746	54.0992	0.607727	1.42891	0.0147894	0.0737696
1325_004__Ap_a_02_28	28	6	11.81	61.98	83.33	112.61	4	2.78	1.02	5	14	76	1.67	1.74	2.55	0.98	0.37	0.77	1.44	0		1	43Ca	1	43Ca	1.47	24.45	0.8506	39	-	0.0678525	0.0084572	0.0333935	0.00612953	0.0031543	0.00150298	0.0710621	0.183168	48.8658	1.37648	0.179876	0.066708	0.0452048	0.0450746	54.0992	0.607727	1.42891	0.0147894	0.0737696
1325_004__Ap_a_02_29	29	1	12.79	66.39	127.2	70.18	4	2.71	0.45	10	63	21	1.02	1.11	1.51	1.03	1.17	1.33	1.46	0.01	207Pb	1	43Ca	1	43Ca	2.37	27.25	0.8542	39	-	0.0607251	0.00910948	0.00926979	0.00145239	0.0015199	0.00116766	0	0	57.1541	1.09471	0.167022	0.0725506	0.119675	0.0416088	54.0932	0.743209	1.46174	0.0197185	0.0571505
1325_004__Ap_a_02_29	29	2	8.74	78.4	127.2	70.18	4	2.71	0.45	10	63	21	1.02	1.11	1.51	1.03	1.17	1.33	1.46	0.01	207Pb	1	43Ca	1	43Ca	2.37	27.25	0.8542	39	-	0.0607251	0.00910948	0.00926979	0.00145239	0.0015199	0.00116766	0	0	57.1541	1.09471	0.167022	0.0725506	0.119675	0.0416088	54.0932	0.743209	1.46174	0.0197185	0.0571505
1325_004__Ap_a_02_29	29	3	12.92	26.71	127.2	70.18	4	2.71	0.45	10	63	21	1.02	1.11	1.51	1.03	1.17	1.33	1.46	0.01	207Pb	1	43Ca	1	43Ca	2.37	27.25	0.8542	39	-	0.0607251	0.00910948	0.00926979	0.00145239	0.0015199	0.00116766	0	0	57.1541	1.09471	0.167022	0.0725506	0.119675	0.0416088	54.0932	0.743209	1.46174	0.0197185	0.0571505
1325_004__Ap_a_02_29	29	4	13.75	71.57	127.2	70.18	4	2.71	0.45	10	63	21	1.02	1.11	1.51	1.03	1.17	1.33	1.46	0.01	207Pb	1	43Ca	1	43Ca	2.37	27.25	0.8542	39	-	0.0607251	0.00910948	0.00926979	0.00145239	0.0015199	0.00116766	0	0	57.1541	1.09471	0.167022	0.0725506	0.119675	0.0416088	54.0932	0.743209	1.46174	0.0197185	0.0571505
1325_004__Ap_a_02_29	29	5	13.94	83.18	127.2	70.18	4	2.71	0.45	10	63	21	1.02	1.11	1.51	1.03	1.17	1.33	1.46	0.01	207Pb	1	43Ca	1	43Ca	2.37	27.25	0.8542	39	-	0.0607251	0.00910948	0.00926979	0.00145239	0.0015199	0.00116766	0	0	57.1541	1.09471	0.167022	0.0725506	0.119675	0.0416088	54.0932	0.743209	1.46174	0.0197185	0.0571505
1325_004__Ap_a_02_30	30	1	14.83	38.99	101.43	63.37	3	2.11	0.25	11	104	157	1.74	1.01	1.05	0.91	0.88	0.97	0.86	0	207Pb	1	43Ca	1	43Ca	2.98	26.56	0.8526	39	-	0.0123578	0.00736372	0.0147793	0.00381271	0.000203694	0.00282044	0.0355252	0.158331	56.0222	1.13573	0.156466	0.0783626	0.0855273	0.0529779	54.0873	0.491058	1.46662	0.0136998	0.0620662
1325_004__Ap_a_02_30	30	2	12.23	60.39	101.43	63.37	3	2.11	0.25	11	104	157	1.74	1.01	1.05	0.91	0.88	0.97	0.86	0	207Pb	1	43Ca	1	43Ca	2.98	26.56	0.8526	39	-	0.0123578	0.00736372	0.0147793	0.00381271	0.000203694	0.00282044	0.0355252	0.158331	56.0222	1.13573	0.156466	0.0783626	0.0855273	0.0529779	54.0873	0.491058	1.46662	0.0136998	0.0620662
1325_004__Ap_a_02_30	30	3	12.78	60.96	101.43	63.37	3	2.11	0.25	11	104	157	1.74	1.01	1.05	0.91	0.88	0.97	0.86	0	207Pb	1	43Ca	1	43Ca	2.98	26.56	0.8526	39	-	0.0123578	0.00736372	0.0147793	0.00381271	0.000203694	0.00282044	0.0355252	0.158331	56.0222	1.13573	0.156466	0.0783626	0.0855273	0.0529779	54.0873	0.491058	1.46662	0.0136998	0.0620662
1325_004__Ap_a_02_30	30	4	15.99	45.89	101.43	63.37	3	2.11	0.25	11	104	157	1.74	1.01	1.05	0.91	0.88	0.97	0.86	0	207Pb	1	43Ca	1	43Ca	2.98	26.56	0.8526	39	-	0.0123578	0.00736372	0.0147793	0.00381271	0.000203694	0.00282044	0.0355252	0.158331	56.0222	1.13573	0.156466	0.0783626	0.0855273	0.0529779	54.0873	0.491058	1.46662	0.0136998	0.0620662
1325_004__Ap_a_02_30	30	5	11.11	60.44	101.43	63.37	3	2.11	0.25	11	104	157	1.74	1.01	1.05	0.91	0.88	0.97	0.86	0	207Pb	1	43Ca	1	43Ca	2.98	26.56	0.8526	39	-	0.0123578	0.00736372	0.0147793	0.00381271	0.000203694	0.00282044	0.0355252	0.158331	56.0222	1.13573	0.156466	0.0783626	0.0855273	0.0529779	54.0873	0.491058	1.46662	0.0136998	0.0620662
1325_004__Ap_a_02_30	30	6	15.49	45.37	101.43	63.37	3	2.11	0.25	11	104	157	1.74	1.01	1.05	0.91	0.88	0.97	0.86	0	207Pb	1	43Ca	1	43Ca	2.98	26.56	0.8526	39	-	0.0123578	0.00736372	0.0147793	0.00381271	0.000203694	0.00282044	0.0355252	0.158331	56.0222	1.13573	0.156466	0.0783626	0.0855273	0.0529779	54.0873	0.491058	1.46662	0.0136998	0.0620662
1325_004__Ap_a_02_30	30	7	14.56	36.93	101.43	63.37	3	2.11	0.25	11	104	157	1.74	1.01	1.05	0.91	0.88	0.97	0.86	0	207Pb	1	43Ca	1	43Ca	2.98	26.56	0.8526	39	-	0.0123578	0.00736372	0.0147793	0.00381271	0.000203694	0.00282044	0.0355252	0.158331	56.0222	1.13573	0.156466	0.0783626	0.0855273	0.0529779	54.0873	0.491058	1.46662	0.0136998	0.0620662
1325_004__Ap_a_02_31	31	1	14.87	48.36	159.1	191.4	4	2.36	0.41	3	12	46	1.47	0.65	1.56	1.33	1.16	0.99	1.23	0	208Pb	1	43Ca	1	43Ca	5.51	26.69	0.853	39	-	0.0473613	0.00817855	0.0120528	0.0035757	0.000532188	0.00100803	0	0	50.7538	1.42168	0.290571	0.0747364	0.218194	0.0412411	54.0814	1.05035	1.45542	0.0266238	0.0318184
1325_004__Ap_a_02_31	31	2	14.18	87.36	159.1	191.4	4	2.36	0.41	3	12	46	1.47	0.65	1.56	1.33	1.16	0.99	1.23	0	208Pb	1	43Ca	1	43Ca	5.51	26.69	0.853	39	-	0.0473613	0.00817855	0.0120528	0.0035757	0.000532188	0.00100803	0	0	50.7538	1.42168	0.290571	0.0747364	0.218194	0.0412411	54.0814	1.05035	1.45542	0.0266238	0.0318184
1325_004__Ap_a_02_31	31	3	15.18	49.22	159.1	191.4	4	2.36	0.41	3	12	46	1.47	0.65	1.56	1.33	1.16	0.99	1.23	0	208Pb	1	43Ca	1	43Ca	5.51	26.69	0.853	39	-	0.0473613	0.00817855	0.0120528	0.0035757	0.000532188	0.00100803	0	0	50.7538	1.42168	0.290571	0.0747364	0.218194	0.0412411	54.0814	1.05035	1.45542	0.0266238	0.0318184
1325_004__Ap_a_02_31	31	4	15.37	50.66	159.1	191.4	4	2.36	0.41	3	12	46	1.47	0.65	1.56	1.33	1.16	0.99	1.23	0	208Pb	1	43Ca	1	43Ca	5.51	26.69	0.853	39	-	0.0473613	0.00817855	0.0120528	0.0035757	0.000532188	0.00100803	0	0	50.7538	1.42168	0.290571	0.0747364	0.218194	0.0412411	54.0814	1.05035	1.45542	0.0266238	0.0318184
1325_004__Ap_a_02_32	32	1	11.9	83.75	383.07	480.04	4	2.25	0.53	2	15	17	1.24	0.9	0.75	0.89	1.44	1.26	1.59	0	208Pb	1	43Ca	1	43Ca	6	26.73	0.8442	39	-	0.0841356	0.0109346	0.0168153	0.00283754	0.00149678	0.00301154	0.0503833	0.194148	46.6877	1.63488	0.299438	0.0412674	0.221789	0.0393528	54.0754	1.1117	1.45399	0.0297938	0.0909975
1325_004__Ap_a_02_32	32	2	10.9	84.05	383.07	480.04	4	2.25	0.53	2	15	17	1.24	0.9	0.75	0.89	1.44	1.26	1.59	0	208Pb	1	43Ca	1	43Ca	6	26.73	0.8442	39	-	0.0841356	0.0109346	0.0168153	0.00283754	0.00149678	0.00301154	0.0503833	0.194148	46.6877	1.63488	0.299438	0.0412674	0.221789	0.0393528	54.0754	1.1117	1.45399	0.0297938	0.0909975
1325_004__Ap_a_02_32	32	3	11.97	65.08	383.07	480.04	4	2.25	0.53	2	15	17	1.24	0.9	0.75	0.89	1.44	1.26	1.59	0	208Pb	1	43Ca	1	43Ca	6	26.73	0.8442	39	-	0.0841356	0.0109346	0.0168153	0.00283754	0.00149678	0.00301154	0.0503833	0.194148	46.6877	1.63488	0.299438	0.0412674	0.221789	0.0393528	54.0754	1.1117	1.45399	0.0297938	0.0909975
1325_004__Ap_a_02_33	33	1	16.61	14.61	98.22	66.29	4	2.18	0.69	10	38	4	0.72	0.98	1.28	0.72	1.25	1.17	1.09	0		1	43Ca	1	43Ca	1.85	23.49	0.8323	39	-	0.016509	0.00721034	0.0117531	0.00240862	7.43652e-05	0.00154576	0	0	38.7203	1.55347	0.275813	0.0846166	0.540019	0.0404089	54.0695	0.606239	1.46409	0.0169791	0.0435726
1325_004__Ap_a_02_33	33	2	16.06	55.42	98.22	66.29	4	2.18	0.69	10	38	4	0.72	0.98	1.28	0.72	1.25	1.17	1.09	0		1	43Ca	1	43Ca	1.85	23.49	0.8323	39	-	0.016509	0.00721034	0.0117531	0.00240862	7.43652e-05	0.00154576	0	0	38.7203	1.55347	0.275813	0.0846166	0.540019	0.0404089	54.0695	0.606239	1.46409	0.0169791	0.0435726
1325_004__Ap_a_02_33	33	3	13.08	65.13	98.22	66.29	4	2.18	0.69	10	38	4	0.72	0.98	1.28	0.72	1.25	1.17	1.09	0		1	43Ca	1	43Ca	1.85	23.49	0.8323	39	-	0.016509	0.00721034	0.0117531	0.00240862	7.43652e-05	0.00154576	0	0	38.7203	1.55347	0.275813	0.0846166	0.540019	0.0404089	54.0695	0.606239	1.46409	0.0169791	0.0435726
1325_004__Ap_a_02_33	33	4	12.5	49.42	98.22	66.29	4	2.18	0.69	10	38	4	0.72	0.98	1.28	0.72	1.25	1.17	1.09	0		1	43Ca	1	43Ca	1.85	23.49	0.8323	39	-	0.016509	0.00721034	0.0117531	0.00240862	7.43652e-05	0.00154576	0	0	38.7203	1.55347	0.275813	0.0846166	0.540019	0.0404089	54.0695	0.606239	1.46409	0.0169791	0.0435726
1325_004__Ap_a_02_34	34	1	8.92	66.88	139.57	202.43	3	2.69	0.78	3	24	75	0.67	1.26	1.07	2.04	0.73	0.62	1.04	1.41	235U	1	43Ca	1	43Ca	1.75	27.39	0.8161	39	-	0.0812616	0.0128514	0.0520849	0.00857024	0.0022644	0.00214935	0.0599444	0.0901487	51.1936	1.3298	0.226367	0.0697163	0.592315	0.0437411	54.0636	0.517456	1.44111	0.0126857	0.0933158
1325_004__Ap_a_02_34	34	2	14.8	41	139.57	202.43	3	2.69	0.78	3	24	75	0.67	1.26	1.07	2.04	0.73	0.62	1.04	1.41	235U	1	43Ca	1	43Ca	1.75	27.39	0.8161	39	-	0.0812616	0.0128514	0.0520849	0.00857024	0.0022644	0.00214935	0.0599444	0.0901487	51.1936	1.3298	0.226367	0.0697163	0.592315	0.0437411	54.0636	0.517456	1.44111	0.0126857	0.0933158
1325_004__Ap_a_02_35	35	1	15.4	58.34	119.76	58.43	4	2.16	0.48	7	29	9	2	1.65	2.73	1.4	0.38	0.48	0.78	0.01	206Pb	1	43Ca	1	43Ca	1.06	25.97	0.8532	39	-	0.0692209	0.00641693	0.0121527	0.00500507	0.0416349	0.00377178	0	0	45.9419	1.50707	0.20836	0.0801275	0.134972	0.0538697	54.0576	0.622369	1.4517	0.0163871	0.0506016
1325_004__Ap_a_02_35	35	2	12.09	68	119.76	58.43	4	2.16	0.48	7	29	9	2	1.65	2.73	1.4	0.38	0.48	0.78	0.01	206Pb	1	43Ca	1	43Ca	1.06	25.97	0.8532	39	-	0.0692209	0.00641693	0.0121527	0.00500507	0.0416349	0.00377178	0	0	45.9419	1.50707	0.20836	0.0801275	0.134972	0.0538697	54.0576	0.622369	1.4517	0.0163871	0.0506016
1325_004__Ap_a_02_35	35	3	11.82	44.35	119.76	58.43	4	2.16	0.48	7	29	9	2	1.65	2.73	1.4	0.38	0.48	0.78	0.01	206Pb	1	43Ca	1	43Ca	1.06	25.97	0.8532	39	-	0.0692209	0.00641693	0.0121527	0.00500507	0.0416349	0.00377178	0	0	45.9419	1.50707	0.20836	0.0801275	0.134972	0.0538697	54.0576	0.622369	1.4517	0.0163871	0.0506016
1325_004__Ap_a_02_36	36	1	13.95	51.56	80.35	70.66	4	2.61	0.74	15	57	23	1.98	1.16	1.07	1.44	0.72	0.55	0.61	0		1	43Ca	1	43Ca	2.35	26.3	0.8461	39	-	0.0561385	0.00851092	0.0206615	0.00489405	0.0124457	0.00242313	0.0748835	0.257156	47.3062	2.17397	0.190351	0.0712775	0.289089	0.0552014	54.0517	0.566906	1.46109	0.0149022	0.0558981
1325_004__Ap_a_02_36	36	2	15.05	59.32	80.35	70.66	4	2.61	0.74	15	57	23	1.98	1.16	1.07	1.44	0.72	0.55	0.61	0		1	43Ca	1	43Ca	2.35	26.3	0.8461	39	-	0.0561385	0.00851092	0.0206615	0.00489405	0.0124457	0.00242313	0.0748835	0.257156	47.3062	2.17397	0.190351	0.0712775	0.289089	0.0552014	54.0517	0.566906	1.46109	0.0149022	0.0558981
1325_004__Ap_a_02_36	36	3	14.31	86.69	80.35	70.66	4	2.61	0.74	15	57	23	1.98	1.16	1.07	1.44	0.72	0.55	0.61	0		1	43Ca	1	43Ca	2.35	26.3	0.8461	39	-	0.0561385	0.00851092	0.0206615	0.00489405	0.0124457	0.00242313	0.0748835	0.257156	47.3062	2.17397	0.190351	0.0712775	0.289089	0.0552014	54.0517	0.566906	1.46109	0.0149022	0.0558981
1325_004__Ap_a_02_36	36	4	16.61	9.52	80.35	70.66	4	2.61	0.74	15	57	23	1.98	1.16	1.07	1.44	0.72	0.55	0.61	0		1	43Ca	1	43Ca	2.35	26.3	0.8461	39	-	0.0561385	0.00851092	0.0206615	0.00489405	0.0124457	0.00242313	0.0748835	0.257156	47.3062	2.17397	0.190351	0.0712775	0.289089	0.0552014	54.0517	0.566906	1.46109	0.0149022	0.0558981
1325_004__Ap_a_02_36	36	5	12.62	83.56	80.35	70.66	4	2.61	0.74	15	57	23	1.98	1.16	1.07	1.44	0.72	0.55	0.61	0		1	43Ca	1	43Ca	2.35	26.3	0.8461	39	-	0.0561385	0.00851092	0.0206615	0.00489405	0.0124457	0.00242313	0.0748835	0.257156	47.3062	2.17397	0.190351	0.0712775	0.289089	0.0552014	54.0517	0.566906	1.46109	0.0149022	0.0558981
1325_004__Ap_a_02_36	36	6	12.44	45.95	80.35	70.66	4	2.61	0.74	15	57	23	1.98	1.16	1.07	1.44	0.72	0.55	0.61	0		1	43Ca	1	43Ca	2.35	26.3	0.8461	39	-	0.0561385	0.00851092	0.0206615	0.00489405	0.0124457	0.00242313	0.0748835	0.257156	47.3062	2.17397	0.190351	0.0712775	0.289089	0.0552014	54.0517	0.566906	1.46109	0.0149022	0.0558981
1325_004__Ap_a_02_36	36	7	11.8	69.35	80.35	70.66	4	2.61	0.74	15	57	23	1.98	1.16	1.07	1.44	0.72	0.55	0.61	0		1	43Ca	1	43Ca	2.35	26.3	0.8461	39	-	0.0561385	0.00851092	0.0206615	0.00489405	0.0124457	0.00242313	0.0748835	0.257156	47.3062	2.17397	0.190351	0.0712775	0.289089	0.0552014	54.0517	0.566906	1.46109	0.0149022	0.0558981
1325_004__Ap_a_02_36	36	8	11.89	73.07	80.35	70.66	4	2.61	0.74	15	57	23	1.98	1.16	1.07	1.44	0.72	0.55	0.61	0		1	43Ca	1	43Ca	2.35	26.3	0.8461	39	-	0.0561385	0.00851092	0.0206615	0.00489405	0.0124457	0.00242313	0.0748835	0.257156	47.3062	2.17397	0.190351	0.0712775	0.289089	0.0552014	54.0517	0.566906	1.46109	0.0149022	0.0558981
1325_004__Ap_a_02_37	37	1	12.83	43.84	106.41	58.16	2	2.14	0.39	19	23	43	1.13	1.06	0.96	1.68	1.47	1.01	1.08	0	206Pb	1	43Ca	1	43Ca	2.2	27.62	0.844	39	-	0.0504906	0.0061832	0.0221274	0.00353129	0.00173376	0.00286145	0	0	46.9119	1.45185	0.294986	0.0872272	0.302053	0.0463635	54.0458	1.13617	1.45285	0.028331	0.05397
1325_004__Ap_a_02_38	38	1	13.41	71.91	62.79	37.68	4	2.91	0.63	18	68	102	0.66	1.34	0.94	0.98	0.94	1.05	1.49	0		1	43Ca	1	43Ca	2.7	24.3	0.8059	39	-	0.0668488	0.0107063	0.0175018	0.0029004	0.00350906	0.00222045	0.0232376	0.164258	46.4126	0.944121	0.13955	0.0692963	0.88159	0.0529144	54.0399	0.540854	1.45173	0.0149069	0.0971316
1325_004__Ap_a_02_38	38	2	12.57	85.93	62.79	37.68	4	2.91	0.63	18	68	102	0.66	1.34	0.94	0.98	0.94	1.05	1.49	0		1	43Ca	1	43Ca	2.7	24.3	0.8059	39	-	0.0668488	0.0107063	0.0175018	0.0029004	0.00350906	0.00222045	0.0232376	0.164258	46.4126	0.944121	0.13955	0.0692963	0.88159	0.0529144	54.0399	0.540854	1.45173	0.0149069	0.0971316
1325_004__Ap_a_02_38	38	3	13.78	39.3	62.79	37.68	4	2.91	0.63	18	68	102	0.66	1.34	0.94	0.98	0.94	1.05	1.49	0		1	43Ca	1	43Ca	2.7	24.3	0.8059	39	-	0.0668488	0.0107063	0.0175018	0.0029004	0.00350906	0.00222045	0.0232376	0.164258	46.4126	0.944121	0.13955	0.0692963	0.88159	0.0529144	54.0399	0.540854	1.45173	0.0149069	0.0971316
1325_004__Ap_a_02_38	38	4	14.23	49.78	62.79	37.68	4	2.91	0.63	18	68	102	0.66	1.34	0.94	0.98	0.94	1.05	1.49	0		1	43Ca	1	43Ca	2.7	24.3	0.8059	39	-	0.0668488	0.0107063	0.0175018	0.0029004	0.00350906	0.00222045	0.0232376	0.164258	46.4126	0.944121	0.13955	0.0692963	0.88159	0.0529144	54.0399	0.540854	1.45173	0.0149069	0.0971316
1325_004__Ap_a_02_38	38	5	14.92	49.42	62.79	37.68	4	2.91	0.63	18	68	102	0.66	1.34	0.94	0.98	0.94	1.05	1.49	0		1	43Ca	1	43Ca	2.7	24.3	0.8059	39	-	0.0668488	0.0107063	0.0175018	0.0029004	0.00350906	0.00222045	0.0232376	0.164258	46.4126	0.944121	0.13955	0.0692963	0.88159	0.0529144	54.0399	0.540854	1.45173	0.0149069	0.0971316
1325_004__Ap_a_02_38	38	6	13.26	43.87	62.79	37.68	4	2.91	0.63	18	68	102	0.66	1.34	0.94	0.98	0.94	1.05	1.49	0		1	43Ca	1	43Ca	2.7	24.3	0.8059	39	-	0.0668488	0.0107063	0.0175018	0.0029004	0.00350906	0.00222045	0.0232376	0.164258	46.4126	0.944121	0.13955	0.0692963	0.88159	0.0529144	54.0399	0.540854	1.45173	0.0149069	0.0971316
1325_004__Ap_a_02_38	38	7	12.62	52.71	62.79	37.68	4	2.91	0.63	18	68	102	0.66	1.34	0.94	0.98	0.94	1.05	1.49	0		1	43Ca	1	43Ca	2.7	24.3	0.8059	39	-	0.0668488	0.0107063	0.0175018	0.0029004	0.00350906	0.00222045	0.0232376	0.164258	46.4126	0.944121	0.13955	0.0692963	0.88159	0.0529144	54.0399	0.540854	1.45173	0.0149069	0.0971316
1325_004__Ap_a_02_38	38	8	9.44	77.42	62.79	37.68	4	2.91	0.63	18	68	102	0.66	1.34	0.94	0.98	0.94	1.05	1.49	0		1	43Ca	1	43Ca	2.7	24.3	0.8059	39	-	0.0668488	0.0107063	0.0175018	0.0029004	0.00350906	0.00222045	0.0232376	0.164258	46.4126	0.944121	0.13955	0.0692963	0.88159	0.0529144	54.0399	0.540854	1.45173	0.0149069	0.0971316
1325_004__Ap_a_02_39	39	1	15.33	33.84	81.95	71.77	4	2.55	0.46	8	37	153	1.38	0.72	1.12	0.98	1.17	1.15	1.09	0	208Pb	1	43Ca	1	43Ca	3.82	28.65	0.7832	39	-	0.0912031	0.00865115	0.0646661	0.00510003	0.00176085	0.00219738	0	0	50.2662	1.27752	0.279592	0.0484099	1.11409	0.0679717	54.0245	1.02293	1.46398	0.0291766	0.0726555
1325_004__Ap_a_02_39	39	2	15.25	50.22	81.95	71.77	4	2.55	0.46	8	37	153	1.38	0.72	1.12	0.98	1.17	1.15	1.09	0	208Pb	1	43Ca	1	43Ca	3.82	28.65	0.7832	39	-	0.0912031	0.00865115	0.0646661	0.00510003	0.00176085	0.00219738	0	0	50.2662	1.27752	0.279592	0.0484099	1.11409	0.0679717	54.0245	1.02293	1.46398	0.0291766	0.0726555
1325_004__Ap_a_02_39	39	3	12.04	59.16	81.95	71.77	4	2.55	0.46	8	37	153	1.38	0.72	1.12	0.98	1.17	1.15	1.09	0	208Pb	1	43Ca	1	43Ca	3.82	28.65	0.7832	39	-	0.0912031	0.00865115	0.0646661	0.00510003	0.00176085	0.00219738	0	0	50.2662	1.27752	0.279592	0.0484099	1.11409	0.0679717	54.0245	1.02293	1.46398	0.0291766	0.0726555
1325_004__Ap_a_02_39	39	4	15.12	49.48	81.95	71.77	4	2.55	0.46	8	37	153	1.38	0.72	1.12	0.98	1.17	1.15	1.09	0	208Pb	1	43Ca	1	43Ca	3.82	28.65	0.7832	39	-	0.0912031	0.00865115	0.0646661	0.00510003	0.00176085	0.00219738	0	0	50.2662	1.27752	0.279592	0.0484099	1.11409	0.0679717	54.0245	1.02293	1.46398	0.0291766	0.0726555
1325_004__Ap_a_02_39	39	5	14.2	76.55	81.95	71.77	4	2.55	0.46	8	37	153	1.38	0.72	1.12	0.98	1.17	1.15	1.09	0	208Pb	1	43Ca	1	43Ca	3.82	28.65	0.7832	39	-	0.0912031	0.00865115	0.0646661	0.00510003	0.00176085	0.00219738	0	0	50.2662	1.27752	0.279592	0.0484099	1.11409	0.0679717	54.0245	1.02293	1.46398	0.0291766	0.0726555
1325_004__Ap_a_02_39	39	6	14.88	68.24	81.95	71.77	4	2.55	0.46	8	37	153	1.38	0.72	1.12	0.98	1.17	1.15	1.09	0	208Pb	1	43Ca	1	43Ca	3.82	28.65	0.7832	39	-	0.0912031	0.00865115	0.0646661	0.00510003	0.00176085	0.00219738	0	0	50.2662	1.27752	0.279592	0.0484099	1.11409	0.0679717	54.0245	1.02293	1.46398	0.0291766	0.0726555
1325_004__Ap_a_02_40	40	1	14.21	42.82	87.78	32.78	4	2.4	0.42	25	50	16	0.77	0.78	0.98	1.8	1.13	0.83	0.42	0.08	235U	1	43Ca	1	43Ca	14.86	25.31	0.8565	39	-	0.0526478	0.00820598	0.0029901	0.00226552	0.00488804	0.00175821	0	0	45.8872	1.39192	0.196293	0.10726	0.101825	0.0481455	54.0019	0.658707	1.47931	0.017666	0.0582179
1325_004__Ap_a_02_40	40	2	13.71	47.83	87.78	32.78	4	2.4	0.42	25	50	16	0.77	0.78	0.98	1.8	1.13	0.83	0.42	0.08	235U	1	43Ca	1	43Ca	14.86	25.31	0.8565	39	-	0.0526478	0.00820598	0.0029901	0.00226552	0.00488804	0.00175821	0	0	45.8872	1.39192	0.196293	0.10726	0.101825	0.0481455	54.0019	0.658707	1.47931	0.017666	0.0582179
1325_004__Ap_a_02_41	41	1	10.98	67.67	87.2	57.11	4	2.62	0.56	15	48	52	1.93	0.87	0.99	0.86	0.94	0.91	0.9	0	207Pb	1	43Ca	1	43Ca	16.91	24.8	0.8329	39	-	0.0488183	0.00821242	0.022601	0.00471075	0.00299283	0.0021364	0.0370248	0.11889	40.9378	1.31531	0.188628	0.0574864	0.409362	0.069976	53.9793	0.508304	1.46377	0.0134494	0.0670793
1325_004__Ap_a_02_41	41	2	15.28	21.54	87.2	57.11	4	2.62	0.56	15	48	52	1.93	0.87	0.99	0.86	0.94	0.91	0.9	0	207Pb	1	43Ca	1	43Ca	16.91	24.8	0.8329	39	-	0.0488183	0.00821242	0.022601	0.00471075	0.00299283	0.0021364	0.0370248	0.11889	40.9378	1.31531	0.188628	0.0574864	0.409362	0.069976	53.9793	0.508304	1.46377	0.0134494	0.0670793
1325_004__Ap_a_02_41	41	3	13.94	63.95	87.2	57.11	4	2.62	0.56	15	48	52	1.93	0.87	0.99	0.86	0.94	0.91	0.9	0	207Pb	1	43Ca	1	43Ca	16.91	24.8	0.8329	39	-	0.0488183	0.00821242	0.022601	0.00471075	0.00299283	0.0021364	0.0370248	0.11889	40.9378	1.31531	0.188628	0.0574864	0.409362	0.069976	53.9793	0.508304	1.46377	0.0134494	0.0670793
1325_004__Ap_a_02_41	41	4	13.88	45.76	87.2	57.11	4	2.62	0.56	15	48	52	1.93	0.87	0.99	0.86	0.94	0.91	0.9	0	207Pb	1	43Ca	1	43Ca	16.91	24.8	0.8329	39	-	0.0488183	0.00821242	0.022601	0.00471075	0.00299283	0.0021364	0.0370248	0.11889	40.9378	1.31531	0.188628	0.0574864	0.409362	0.069976	53.9793	0.508304	1.46377	0.0134494	0.0670793
1325_004__Ap_a_02_41	41	5	12.23	75.53	87.2	57.11	4	2.62	0.56	15	48	52	1.93	0.87	0.99	0.86	0.94	0.91	0.9	0	207Pb	1	43Ca	1	43Ca	16.91	24.8	0.8329	39	-	0.0488183	0.00821242	0.022601	0.00471075	0.00299283	0.0021364	0.0370248	0.11889	40.9378	1.31531	0.188628	0.0574864	0.409362	0.069976	53.9793	0.508304	1.46377	0.0134494	0.0670793
1325_004__Ap_a_02_41	41	6	15.06	27.96	87.2	57.11	4	2.62	0.56	15	48	52	1.93	0.87	0.99	0.86	0.94	0.91	0.9	0	207Pb	1	43Ca	1	43Ca	16.91	24.8	0.8329	39	-	0.0488183	0.00821242	0.022601	0.00471075	0.00299283	0.0021364	0.0370248	0.11889	40.9378	1.31531	0.188628	0.0574864	0.409362	0.069976	53.9793	0.508304	1.46377	0.0134494	0.0670793
1325_004__Ap_a_02_41	41	7	14.7	48.36	87.2	57.11	4	2.62	0.56	15	48	52	1.93	0.87	0.99	0.86	0.94	0.91	0.9	0	207Pb	1	43Ca	1	43Ca	16.91	24.8	0.8329	39	-	0.0488183	0.00821242	0.022601	0.00471075	0.00299283	0.0021364	0.0370248	0.11889	40.9378	1.31531	0.188628	0.0574864	0.409362	0.069976	53.9793	0.508304	1.46377	0.0134494	0.0670793
1325_004__Ap_a_02_41	41	8	12.47	70.27	87.2	57.11	4	2.62	0.56	15	48	52	1.93	0.87	0.99	0.86	0.94	0.91	0.9	0	207Pb	1	43Ca	1	43Ca	16.91	24.8	0.8329	39	-	0.0488183	0.00821242	0.022601	0.00471075	0.00299283	0.0021364	0.0370248	0.11889	40.9378	1.31531	0.188628	0.0574864	0.409362	0.069976	53.9793	0.508304	1.46377	0.0134494	0.0670793
1325_004__Ap_a_02_41	41	9	12.74	61.95	87.2	57.11	4	2.62	0.56	15	48	52	1.93	0.87	0.99	0.86	0.94	0.91	0.9	0	207Pb	1	43Ca	1	43Ca	16.91	24.8	0.8329	39	-	0.0488183	0.00821242	0.022601	0.00471075	0.00299283	0.0021364	0.0370248	0.11889	40.9378	1.31531	0.188628	0.0574864	0.409362	0.069976	53.9793	0.508304	1.46377	0.0134494	0.0670793
1325_004__Ap_a_02_42	42	1	12.05	81.53	108.28	26.98	4	2.5	0.45	45	58	49	1.7	1.15	1.54	1.64	1.01	0.95	0.57	0		1	43Ca	1	43Ca	8.57	26.17	0.8379	39	-	0.00496763	0.00528692	0.015755	0.00302788	0.00263848	0.0018842	0.0424903	0.211077	47.2032	1.97329	0.205787	0.123748	0.443901	0.0336564	53.9567	1.10131	1.44545	0.030062	0.0525028
1325_004__Ap_a_02_42	42	2	12.38	60.12	108.28	26.98	4	2.5	0.45	45	58	49	1.7	1.15	1.54	1.64	1.01	0.95	0.57	0		1	43Ca	1	43Ca	8.57	26.17	0.8379	39	-	0.00496763	0.00528692	0.015755	0.00302788	0.00263848	0.0018842	0.0424903	0.211077	47.2032	1.97329	0.205787	0.123748	0.443901	0.0336564	53.9567	1.10131	1.44545	0.030062	0.0525028
1325_004__Ap_a_02_42	42	3	12.02	84.49	108.28	26.98	4	2.5	0.45	45	58	49	1.7	1.15	1.54	1.64	1.01	0.95	0.57	0		1	43Ca	1	43Ca	8.57	26.17	0.8379	39	-	0.00496763	0.00528692	0.015755	0.00302788	0.00263848	0.0018842	0.0424903	0.211077	47.2032	1.97329	0.205787	0.123748	0.443901	0.0336564	53.9567	1.10131	1.44545	0.030062	0.0525028
1325_004__Ap_a_02_42	42	4	12.51	60.8	108.28	26.98	4	2.5	0.45	45	58	49	1.7	1.15	1.54	1.64	1.01	0.95	0.57	0		1	43Ca	1	43Ca	8.57	26.17	0.8379	39	-	0.00496763	0.00528692	0.015755	0.00302788	0.00263848	0.0018842	0.0424903	0.211077	47.2032	1.97329	0.205787	0.123748	0.443901	0.0336564	53.9567	1.10131	1.44545	0.030062	0.0525028
1325_004__Ap_a_02_42	42	5	12.93	66.39	108.28	26.98	4	2.5	0.45	45	58	49	1.7	1.15	1.54	1.64	1.01	0.95	0.57	0		1	43Ca	1	43Ca	8.57	26.17	0.8379	39	-	0.00496763	0.00528692	0.015755	0.00302788	0.00263848	0.0018842	0.0424903	0.211077	47.2032	1.97329	0.205787	0.123748	0.443901	0.0336564	53.9567	1.10131	1.44545	0.030062	0.0525028
1325_004__Ap_a_02_42	42	6	6.02	83.34	108.28	26.98	4	2.5	0.45	45	58	49	1.7	1.15	1.54	1.64	1.01	0.95	0.57	0		1	43Ca	1	43Ca	8.57	26.17	0.8379	39	-	0.00496763	0.00528692	0.015755	0.00302788	0.00263848	0.0018842	0.0424903	0.211077	47.2032	1.97329	0.205787	0.123748	0.443901	0.0336564	53.9567	1.10131	1.44545	0.030062	0.0525028
1325_004__Ap_a_02_42	42	7	12.77	75.82	108.28	26.98	4	2.5	0.45	45	58	49	1.7	1.15	1.54	1.64	1.01	0.95	0.57	0		1	43Ca	1	43Ca	8.57	26.17	0.8379	39	-	0.00496763	0.00528692	0.015755	0.00302788	0.00263848	0.0018842	0.0424903	0.211077	47.2032	1.97329	0.205787	0.123748	0.443901	0.0336564	53.9567	1.10131	1.44545	0.030062	0.0525028
1325_004__Ap_a_02_42	42	8	11.98	59.77	108.28	26.98	4	2.5	0.45	45	58	49	1.7	1.15	1.54	1.64	1.01	0.95	0.57	0		1	43Ca	1	43Ca	8.57	26.17	0.8379	39	-	0.00496763	0.00528692	0.015755	0.00302788	0.00263848	0.0018842	0.0424903	0.211077	47.2032	1.97329	0.205787	0.123748	0.443901	0.0336564	53.9567	1.10131	1.44545	0.030062	0.0525028
1325_004__Ap_a_02_42	42	9	11.93	64.47	108.28	26.98	4	2.5	0.45	45	58	49	1.7	1.15	1.54	1.64	1.01	0.95	0.57	0		1	43Ca	1	43Ca	8.57	26.17	0.8379	39	-	0.00496763	0.00528692	0.015755	0.00302788	0.00263848	0.0018842	0.0424903	0.211077	47.2032	1.97329	0.205787	0.123748	0.443901	0.0336564	53.9567	1.10131	1.44545	0.030062	0.0525028
1325_004__Ap_a_02_42	42	10	14.74	20.83	108.28	26.98	4	2.5	0.45	45	58	49	1.7	1.15	1.54	1.64	1.01	0.95	0.57	0		1	43Ca	1	43Ca	8.57	26.17	0.8379	39	-	0.00496763	0.00528692	0.015755	0.00302788	0.00263848	0.0018842	0.0424903	0.211077	47.2032	1.97329	0.205787	0.123748	0.443901	0.0336564	53.9567	1.10131	1.44545	0.030062	0.0525028
1325_004__Ap_a_02_42	42	11	12.45	60.77	108.28	26.98	4	2.5	0.45	45	58	49	1.7	1.15	1.54	1.64	1.01	0.95	0.57	0		1	43Ca	1	43Ca	8.57	26.17	0.8379	39	-	0.00496763	0.00528692	0.015755	0.00302788	0.00263848	0.0018842	0.0424903	0.211077	47.2032	1.97329	0.205787	0.123748	0.443901	0.0336564	53.9567	1.10131	1.44545	0.030062	0.0525028
1325_004__Ap_a_02_43	43	1	12.07	46.88	167.95	146.84	4	2.17	0.57	11	42	97	1.79	0.82	0.74	0.99	1.31	1.3	1.1	0	208Pb	1	43Ca	1	43Ca	4.84	26.44	0.8293	39	-	0.189337	0.0105449	0.0501136	0.00655784	0.386163	0.058383	0	0	46.5618	2.19452	0.150077	0.0989144	0.204253	0.0608356	53.9341	0.497366	1.48263	0.0136922	0.0663328
1325_004__Ap_a_02_43	43	2	12.9	79.01	167.95	146.84	4	2.17	0.57	11	42	97	1.79	0.82	0.74	0.99	1.31	1.3	1.1	0	208Pb	1	43Ca	1	43Ca	4.84	26.44	0.8293	39	-	0.189337	0.0105449	0.0501136	0.00655784	0.386163	0.058383	0	0	46.5618	2.19452	0.150077	0.0989144	0.204253	0.0608356	53.9341	0.497366	1.48263	0.0136922	0.0663328
1325_004__Ap_a_02_43	43	3	12.84	65.87	167.95	146.84	4	2.17	0.57	11	42	97	1.79	0.82	0.74	0.99	1.31	1.3	1.1	0	208Pb	1	43Ca	1	43Ca	4.84	26.44	0.8293	39	-	0.189337	0.0105449	0.0501136	0.00655784	0.386163	0.058383	0	0	46.5618	2.19452	0.150077	0.0989144	0.204253	0.0608356	53.9341	0.497366	1.48263	0.0136922	0.0663328
1325_004__Ap_a_02_43	43	4	11.67	31.16	167.95	146.84	4	2.17	0.57	11	42	97	1.79	0.82	0.74	0.99	1.31	1.3	1.1	0	208Pb	1	43Ca	1	43Ca	4.84	26.44	0.8293	39	-	0.189337	0.0105449	0.0501136	0.00655784	0.386163	0.058383	0	0	46.5618	2.19452	0.150077	0.0989144	0.204253	0.0608356	53.9341	0.497366	1.48263	0.0136922	0.0663328
1325_004__Ap_a_02_43	43	5	12.63	52.6	167.95	146.84	4	2.17	0.57	11	42	97	1.79	0.82	0.74	0.99	1.31	1.3	1.1	0	208Pb	1	43Ca	1	43Ca	4.84	26.44	0.8293	39	-	0.189337	0.0105449	0.0501136	0.00655784	0.386163	0.058383	0	0	46.5618	2.19452	0.150077	0.0989144	0.204253	0.0608356	53.9341	0.497366	1.48263	0.0136922	0.0663328
1325_004__Ap_a_02_43	43	6	12.12	77.57	167.95	146.84	4	2.17	0.57	11	42	97	1.79	0.82	0.74	0.99	1.31	1.3	1.1	0	208Pb	1	43Ca	1	43Ca	4.84	26.44	0.8293	39	-	0.189337	0.0105449	0.0501136	0.00655784	0.386163	0.058383	0	0	46.5618	2.19452	0.150077	0.0989144	0.204253	0.0608356	53.9341	0.497366	1.48263	0.0136922	0.0663328
1325_004__Ap_a_02_43	43	7	11.86	70.28	167.95	146.84	4	2.17	0.57	11	42	97	1.79	0.82	0.74	0.99	1.31	1.3	1.1	0	208Pb	1	43Ca	1	43Ca	4.84	26.44	0.8293	39	-	0.189337	0.0105449	0.0501136	0.00655784	0.386163	0.058383	0	0	46.5618	2.19452	0.150077	0.0989144	0.204253	0.0608356	53.9341	0.497366	1.48263	0.0136922	0.0663328
1325_004__Ap_a_02_43	43	8	11.77	69.87	167.95	146.84	4	2.17	0.57	11	42	97	1.79	0.82	0.74	0.99	1.31	1.3	1.1	0	208Pb	1	43Ca	1	43Ca	4.84	26.44	0.8293	39	-	0.189337	0.0105449	0.0501136	0.00655784	0.386163	0.058383	0	0	46.5618	2.19452	0.150077	0.0989144	0.204253	0.0608356	53.9341	0.497366	1.48263	0.0136922	0.0663328
1325_004__Ap_a_02_43	43	9	12.12	72.91	167.95	146.84	4	2.17	0.57	11	42	97	1.79	0.82	0.74	0.99	1.31	1.3	1.1	0	208Pb	1	43Ca	1	43Ca	4.84	26.44	0.8293	39	-	0.189337	0.0105449	0.0501136	0.00655784	0.386163	0.058383	0	0	46.5618	2.19452	0.150077	0.0989144	0.204253	0.0608356	53.9341	0.497366	1.48263	0.0136922	0.0663328
1325_004__Ap_a_02_44	44	1	15.7	28.79	87.21	29.1	4	2.31	0.52	16	58	58	1.93	1.12	0.7	1.01	0.96	1.21	1.11	0.06	207Pb	1	43Ca	1	43Ca	2.45	28.66	0.8514	39	-	0.0469139	0.00499251	0.000287502	0.0040442	0.00228961	0.00346749	0.0504116	0.225962	52.1078	2.27573	0.277088	0.0621129	0.228122	0.0479714	53.9116	0.470779	1.46662	0.0128794	0.048353
1325_004__Ap_a_02_44	44	2	14.53	54.69	87.21	29.1	4	2.31	0.52	16	58	58	1.93	1.12	0.7	1.01	0.96	1.21	1.11	0.06	207Pb	1	43Ca	1	43Ca	2.45	28.66	0.8514	39	-	0.0469139	0.00499251	0.000287502	0.0040442	0.00228961	0.00346749	0.0504116	0.225962	52.1078	2.27573	0.277088	0.0621129	0.228122	0.0479714	53.9116	0.470779	1.46662	0.0128794	0.048353
1325_004__Ap_a_02_44	44	3	15.25	6.69	87.21	29.1	4	2.31	0.52	16	58	58	1.93	1.12	0.7	1.01	0.96	1.21	1.11	0.06	207Pb	1	43Ca	1	43Ca	2.45	28.66	0.8514	39	-	0.0469139	0.00499251	0.000287502	0.0040442	0.00228961	0.00346749	0.0504116	0.225962	52.1078	2.27573	0.277088	0.0621129	0.228122	0.0479714	53.9116	0.470779	1.46662	0.0128794	0.048353
1325_004__Ap_a_02_44	44	4	15.12	54.02	87.21	29.1	4	2.31	0.52	16	58	58	1.93	1.12	0.7	1.01	0.96	1.21	1.11	0.06	207Pb	1	43Ca	1	43Ca	2.45	28.66	0.8514	39	-	0.0469139	0.00499251	0.000287502	0.0040442	0.00228961	0.00346749	0.0504116	0.225962	52.1078	2.27573	0.277088	0.0621129	0.228122	0.0479714	53.9116	0.470779	1.46662	0.0128794	0.048353
1325_004__Ap_a_02_44	44	5	13.78	35.1	87.21	29.1	4	2.31	0.52	16	58	58	1.93	1.12	0.7	1.01	0.96	1.21	1.11	0.06	207Pb	1	43Ca	1	43Ca	2.45	28.66	0.8514	39	-	0.0469139	0.00499251	0.000287502	0.0040442	0.00228961	0.00346749	0.0504116	0.225962	52.1078	2.27573	0.277088	0.0621129	0.228122	0.0479714	53.9116	0.470779	1.46662	0.0128794	0.048353
1325_004__Ap_a_02_44	44	6	11.94	48.75	87.21	29.1	4	2.31	0.52	16	58	58	1.93	1.12	0.7	1.01	0.96	1.21	1.11	0.06	207Pb	1	43Ca	1	43Ca	2.45	28.66	0.8514	39	-	0.0469139	0.00499251	0.000287502	0.0040442	0.00228961	0.00346749	0.0504116	0.225962	52.1078	2.27573	0.277088	0.0621129	0.228122	0.0479714	53.9116	0.470779	1.46662	0.0128794	0.048353
1325_004__Ap_a_02_44	44	7	11.33	46.2	87.21	29.1	4	2.31	0.52	16	58	58	1.93	1.12	0.7	1.01	0.96	1.21	1.11	0.06	207Pb	1	43Ca	1	43Ca	2.45	28.66	0.8514	39	-	0.0469139	0.00499251	0.000287502	0.0040442	0.00228961	0.00346749	0.0504116	0.225962	52.1078	2.27573	0.277088	0.0621129	0.228122	0.0479714	53.9116	0.470779	1.46662	0.0128794	0.048353
1325_004__Ap_a_02_45	45	1	14.06	58.6	67.04	41.49	4	2.33	0.46	14	70	110	1.99	0.98	1.03	1.18	0.91	0.75	0.9	0	208Pb	1	43Ca	1	43Ca	12.16	27.34	0.833	39	-	0.147507	0.00704629	0.0166172	0.00242399	0.00419154	0.00135416	0.212012	0.113673	38.1834	1.32493	0.247826	0.0823012	0.355368	0.0510054	53.8891	0.514117	1.46855	0.0130082	0.0679234
1325_004__Ap_a_02_46	46	1	13.5	41.75	104.67	33.58	4	2.31	0.5	20	68	54	1.82	0.66	0.62	0.92	1.43	1.24	1.14	0.01	208Pb	1	43Ca	1	43Ca	12.13	28.61	0.8556	39	-	0.022344	0.00756954	0.0157136	0.00404626	0.0496792	0.00285017	0.216743	0.199307	48.423	1.51686	0.147929	0.0676671	0.0656493	0.0312979	53.8666	0.623971	1.43669	0.0154891	0.079004
1325_004__Ap_a_02_46	46	2	14.07	60.14	104.67	33.58	4	2.31	0.5	20	68	54	1.82	0.66	0.62	0.92	1.43	1.24	1.14	0.01	208Pb	1	43Ca	1	43Ca	12.13	28.61	0.8556	39	-	0.022344	0.00756954	0.0157136	0.00404626	0.0496792	0.00285017	0.216743	0.199307	48.423	1.51686	0.147929	0.0676671	0.0656493	0.0312979	53.8666	0.623971	1.43669	0.0154891	0.079004
1325_004__Ap_a_02_46	46	3	14.99	49.36	104.67	33.58	4	2.31	0.5	20	68	54	1.82	0.66	0.62	0.92	1.43	1.24	1.14	0.01	208Pb	1	43Ca	1	43Ca	12.13	28.61	0.8556	39	-	0.022344	0.00756954	0.0157136	0.00404626	0.0496792	0.00285017	0.216743	0.199307	48.423	1.51686	0.147929	0.0676671	0.0656493	0.0312979	53.8666	0.623971	1.43669	0.0154891	0.079004
1325_004__Ap_a_02_46	46	4	13.41	38.04	104.67	33.58	4	2.31	0.5	20	68	54	1.82	0.66	0.62	0.92	1.43	1.24	1.14	0.01	208Pb	1	43Ca	1	43Ca	12.13	28.61	0.8556	39	-	0.022344	0.00756954	0.0157136	0.00404626	0.0496792	0.00285017	0.216743	0.199307	48.423	1.51686	0.147929	0.0676671	0.0656493	0.0312979	53.8666	0.623971	1.43669	0.0154891	0.079004
1325_004__Ap_a_02_46	46	5	15.4	18.17	104.67	33.58	4	2.31	0.5	20	68	54	1.82	0.66	0.62	0.92	1.43	1.24	1.14	0.01	208Pb	1	43Ca	1	43Ca	12.13	28.61	0.8556	39	-	0.022344	0.00756954	0.0157136	0.00404626	0.0496792	0.00285017	0.216743	0.199307	48.423	1.51686	0.147929	0.0676671	0.0656493	0.0312979	53.8666	0.623971	1.43669	0.0154891	0.079004
1325_004__Ap_a_02_46	46	6	13.46	62.26	104.67	33.58	4	2.31	0.5	20	68	54	1.82	0.66	0.62	0.92	1.43	1.24	1.14	0.01	208Pb	1	43Ca	1	43Ca	12.13	28.61	0.8556	39	-	0.022344	0.00756954	0.0157136	0.00404626	0.0496792	0.00285017	0.216743	0.199307	48.423	1.51686	0.147929	0.0676671	0.0656493	0.0312979	53.8666	0.623971	1.43669	0.0154891	0.079004
1325_004__Ap_a_02_47	47	1	15	38.48	97.17	60.13	3	2.32	0.45	16	76	27	1.27	0.68	0.81	0.94	2.06	1.59	1.47	0	207Pb	1	43Ca	1	43Ca	74.75	25.02	0.8469	39	-	0.031532	0.0101359	0.00368623	0.00350215	0.000470978	0.00259958	0.0872578	0.196096	40.6544	1.60781	0.234184	0.071705	0.275048	0.0592775	53.8441	1.18368	1.44001	0.0303504	0.0403574
1325_004__Ap_a_02_47	47	2	13.33	42.81	97.17	60.13	3	2.32	0.45	16	76	27	1.27	0.68	0.81	0.94	2.06	1.59	1.47	0	207Pb	1	43Ca	1	43Ca	74.75	25.02	0.8469	39	-	0.031532	0.0101359	0.00368623	0.00350215	0.000470978	0.00259958	0.0872578	0.196096	40.6544	1.60781	0.234184	0.071705	0.275048	0.0592775	53.8441	1.18368	1.44001	0.0303504	0.0403574
1325_004__Ap_a_02_47	47	3	13.61	56.84	97.17	60.13	3	2.32	0.45	16	76	27	1.27	0.68	0.81	0.94	2.06	1.59	1.47	0	207Pb	1	43Ca	1	43Ca	74.75	25.02	0.8469	39	-	0.031532	0.0101359	0.00368623	0.00350215	0.000470978	0.00259958	0.0872578	0.196096	40.6544	1.60781	0.234184	0.071705	0.275048	0.0592775	53.8441	1.18368	1.44001	0.0303504	0.0403574
1325_004__Ap_a_02_47	47	4	12.09	47.32	97.17	60.13	3	2.32	0.45	16	76	27	1.27	0.68	0.81	0.94	2.06	1.59	1.47	0	207Pb	1	43Ca	1	43Ca	74.75	25.02	0.8469	39	-	0.031532	0.0101359	0.00368623	0.00350215	0.000470978	0.00259958	0.0872578	0.196096	40.6544	1.60781	0.234184	0.071705	0.275048	0.0592775	53.8441	1.18368	1.44001	0.0303504	0.0403574
1325_004__Ap_a_02_48	48	1	14.08	32.48	113.91	30.89	4	2.85	0.59	16	67	35	1.23	1.35	1.75	2.11	0.48	0.39	0.83	0	206Pb	1	43Ca	1	43Ca	12.69	26.22	0.8494	39	-	0.0204546	0.00625379	0.0157411	0.00337695	0.00237109	0.00141595	0	0	43.7844	1.07909	0.1719	0.0343574	0.217638	0.0527024	53.8216	1.02825	1.46996	0.028215	0.0482265
1325_004__Ap_a_02_48	48	2	13.72	37.96	113.91	30.89	4	2.85	0.59	16	67	35	1.23	1.35	1.75	2.11	0.48	0.39	0.83	0	206Pb	1	43Ca	1	43Ca	12.69	26.22	0.8494	39	-	0.0204546	0.00625379	0.0157411	0.00337695	0.00237109	0.00141595	0	0	43.7844	1.07909	0.1719	0.0343574	0.217638	0.0527024	53.8216	1.02825	1.46996	0.028215	0.0482265
1325_004__Ap_a_02_48	48	3	13.67	65.6	113.91	30.89	4	2.85	0.59	16	67	35	1.23	1.35	1.75	2.11	0.48	0.39	0.83	0	206Pb	1	43Ca	1	43Ca	12.69	26.22	0.8494	39	-	0.0204546	0.00625379	0.0157411	0.00337695	0.00237109	0.00141595	0	0	43.7844	1.07909	0.1719	0.0343574	0.217638	0.0527024	53.8216	1.02825	1.46996	0.028215	0.0482265
1325_004__Ap_a_02_48	48	4	15.77	21.48	113.91	30.89	4	2.85	0.59	16	67	35	1.23	1.35	1.75	2.11	0.48	0.39	0.83	0	206Pb	1	43Ca	1	43Ca	12.69	26.22	0.8494	39	-	0.0204546	0.00625379	0.0157411	0.00337695	0.00237109	0.00141595	0	0	43.7844	1.07909	0.1719	0.0343574	0.217638	0.0527024	53.8216	1.02825	1.46996	0.028215	0.0482265
1325_004__Ap_a_02_48	48	5	10.16	55.79	113.91	30.89	4	2.85	0.59	16	67	35	1.23	1.35	1.75	2.11	0.48	0.39	0.83	0	206Pb	1	43Ca	1	43Ca	12.69	26.22	0.8494	39	-	0.0204546	0.00625379	0.0157411	0.00337695	0.00237109	0.00141595	0	0	43.7844	1.07909	0.1719	0.0343574	0.217638	0.0527024	53.8216	1.02825	1.46996	0.028215	0.0482265
1325_004__Ap_a_02_48	48	6	12.76	32.2	113.91	30.89	4	2.85	0.59	16	67	35	1.23	1.35	1.75	2.11	0.48	0.39	0.83	0	206Pb	1	43Ca	1	43Ca	12.69	26.22	0.8494	39	-	0.0204546	0.00625379	0.0157411	0.00337695	0.00237109	0.00141595	0	0	43.7844	1.07909	0.1719	0.0343574	0.217638	0.0527024	53.8216	1.02825	1.46996	0.028215	0.0482265
1325_004__Ap_a_02_48	48	7	12.08	75.57	113.91	30.89	4	2.85	0.59	16	67	35	1.23	1.35	1.75	2.11	0.48	0.39	0.83	0	206Pb	1	43Ca	1	43Ca	12.69	26.22	0.8494	39	-	0.0204546	0.00625379	0.0157411	0.00337695	0.00237109	0.00141595	0	0	43.7844	1.07909	0.1719	0.0343574	0.217638	0.0527024	53.8216	1.02825	1.46996	0.028215	0.0482265
1325_004__Ap_a_02_48	48	8	11.37	58	113.91	30.89	4	2.85	0.59	16	67	35	1.23	1.35	1.75	2.11	0.48	0.39	0.83	0	206Pb	1	43Ca	1	43Ca	12.69	26.22	0.8494	39	-	0.0204546	0.00625379	0.0157411	0.00337695	0.00237109	0.00141595	0	0	43.7844	1.07909	0.1719	0.0343574	0.217638	0.0527024	53.8216	1.02825	1.46996	0.028215	0.0482265
1325_004__Ap_a_02_48	48	9	14.3	39.54	113.91	30.89	4	2.85	0.59	16	67	35	1.23	1.35	1.75	2.11	0.48	0.39	0.83	0	206Pb	1	43Ca	1	43Ca	12.69	26.22	0.8494	39	-	0.0204546	0.00625379	0.0157411	0.00337695	0.00237109	0.00141595	0	0	43.7844	1.07909	0.1719	0.0343574	0.217638	0.0527024	53.8216	1.02825	1.46996	0.028215	0.0482265
1325_004__Ap_a_02_49	49	1	13.08	62.4	114.83	30.73	4	2.63	0.5	49	61	58	1.25	0.69	0.65	0.89	1.14	0.99	1.58	0	206Pb	1	43Ca	1	43Ca	3.49	24.74	0.8324	39	-	0.0101647	0.00703418	0.00079056	0.00158677	0.00363753	0.00139378	0	0	32.2072	1.67936	0.356086	0.068948	0.451821	0.0403491	53.7992	1.08815	1.47379	0.0285282	0.0529674
1325_004__Ap_a_02_49	49	2	13.32	75.81	114.83	30.73	4	2.63	0.5	49	61	58	1.25	0.69	0.65	0.89	1.14	0.99	1.58	0	206Pb	1	43Ca	1	43Ca	3.49	24.74	0.8324	39	-	0.0101647	0.00703418	0.00079056	0.00158677	0.00363753	0.00139378	0	0	32.2072	1.67936	0.356086	0.068948	0.451821	0.0403491	53.7992	1.08815	1.47379	0.0285282	0.0529674
1325_004__Ap_a_02_49	49	3	13.61	59.4	114.83	30.73	4	2.63	0.5	49	61	58	1.25	0.69	0.65	0.89	1.14	0.99	1.58	0	206Pb	1	43Ca	1	43Ca	3.49	24.74	0.8324	39	-	0.0101647	0.00703418	0.00079056	0.00158677	0.00363753	0.00139378	0	0	32.2072	1.67936	0.356086	0.068948	0.451821	0.0403491	53.7992	1.08815	1.47379	0.0285282	0.0529674
1325_004__Ap_a_02_49	49	4	12.15	56.57	114.83	30.73	4	2.63	0.5	49	61	58	1.25	0.69	0.65	0.89	1.14	0.99	1.58	0	206Pb	1	43Ca	1	43Ca	3.49	24.74	0.8324	39	-	0.0101647	0.00703418	0.00079056	0.00158677	0.00363753	0.00139378	0	0	32.2072	1.67936	0.356086	0.068948	0.451821	0.0403491	53.7992	1.08815	1.47379	0.0285282	0.0529674
1325_004__Ap_a_02_49	49	5	12.69	66.63	114.83	30.73	4	2.63	0.5	49	61	58	1.25	0.69	0.65	0.89	1.14	0.99	1.58	0	206Pb	1	43Ca	1	43Ca	3.49	24.74	0.8324	39	-	0.0101647	0.00703418	0.00079056	0.00158677	0.00363753	0.00139378	0	0	32.2072	1.67936	0.356086	0.068948	0.451821	0.0403491	53.7992	1.08815	1.47379	0.0285282	0.0529674
1325_004__Ap_a_02_49	49	6	12	89.89	114.83	30.73	4	2.63	0.5	49	61	58	1.25	0.69	0.65	0.89	1.14	0.99	1.58	0	206Pb	1	43Ca	1	43Ca	3.49	24.74	0.8324	39	-	0.0101647	0.00703418	0.00079056	0.00158677	0.00363753	0.00139378	0	0	32.2072	1.67936	0.356086	0.068948	0.451821	0.0403491	53.7992	1.08815	1.47379	0.0285282	0.0529674
1325_004__Ap_a_02_49	49	7	15.44	22.48	114.83	30.73	4	2.63	0.5	49	61	58	1.25	0.69	0.65	0.89	1.14	0.99	1.58	0	206Pb	1	43Ca	1	43Ca	3.49	24.74	0.8324	39	-	0.0101647	0.00703418	0.00079056	0.00158677	0.00363753	0.00139378	0	0	32.2072	1.67936	0.356086	0.068948	0.451821	0.0403491	53.7992	1.08815	1.47379	0.0285282	0.0529674
1325_004__Ap_a_02_49	49	8	11.57	75.62	114.83	30.73	4	2.63	0.5	49	61	58	1.25	0.69	0.65	0.89	1.14	0.99	1.58	0	206Pb	1	43Ca	1	43Ca	3.49	24.74	0.8324	39	-	0.0101647	0.00703418	0.00079056	0.00158677	0.00363753	0.00139378	0	0	32.2072	1.67936	0.356086	0.068948	0.451821	0.0403491	53.7992	1.08815	1.47379	0.0285282	0.0529674
mm-2-21
Spot Name	Spot Index	Track	Length	Angle to c	UPb Age (Ma)	2 sigma (Ma)	Etch Figs.	Dpar (um)	Dper (um)	[U] (ppm)	[Th] (ppm)	[Sm] (ppm)	Spike Ca	Spike 206Pb/238U	Spike 207Pb/238U	Spike 208Pb/232Th	Spike 238U/Ca	Spike 232Th/Ca	Spike 147Sm/Ca	Quality: Bkg	Quality: Bkg Iso	Quality: Q	Quality: Q Iso	Quality: Del	Quality: Del Iso	Quality: 204Pb	Quality: Mineral	rmr0	Isotopes	-	23Na wt% oxide raw	23Na wt% oxide raw 1sig	24Mg wt% oxide raw	24Mg wt% oxide raw 1sig	27Al/43Ca raw	27Al/43Ca raw 1sig	29Si/43Ca raw	29Si/43Ca raw 1sig	31P wt% oxide raw	31P wt% oxide raw 1sig	34S wt% oxide raw	34S wt% oxide raw 1sig	35Cl wt% oxide raw	35Cl wt% oxide raw 1sig	43Ca wt% oxide raw	43Ca wt% oxide raw 1sig	48Ca/43Ca raw	48Ca/43Ca raw 1sig	55Mn wt% oxide raw
1325_005__Ap_a_02_1	1	1	10.29	78.8	0	0	4	2.34	0.49	0	0	0	0	0	0	0	0	0	0	0	0	0	0	0	0	0	0	0.8097	39	-	0	0	0	0	0	0	0	0	0	0	0	0	0	0	0	0	0	0	0
1325_005__Ap_a_02_2	2	1	9.53	61.3	0	0	4	2.36	0.41	0	0	0	0	0	0	0	0	0	0	0	0	0	0	0	0	0	0	0.8453	39	-	0	0	0	0	0	0	0	0	0	0	0	0	0	0	0	0	0	0	0
1325_005__Ap_a_02_2	2	2	10.42	74.59	0	0	4	2.36	0.41	0	0	0	0	0	0	0	0	0	0	0	0	0	0	0	0	0	0	0.8453	39	-	0	0	0	0	0	0	0	0	0	0	0	0	0	0	0	0	0	0	0
1325_005__Ap_a_02_2	2	3	15.08	34.49	0	0	4	2.36	0.41	0	0	0	0	0	0	0	0	0	0	0	0	0	0	0	0	0	0	0.8453	39	-	0	0	0	0	0	0	0	0	0	0	0	0	0	0	0	0	0	0	0
1325_005__Ap_a_02_3	3	1	7.22	69.65	0	0	4	2.27	0.41	1	14	11	940.88	3.19	2.67	0	0.02	0	0	0	207Pb	1	43Ca	1	43Ca	143.52	87.19	0.7919	39	-	0.0558382	0.0734489	0.227529	0.0241817	0.701949	0.0850309	1.22929	2.14779	136.301	19.6858	1.07151	0.665124	1.15349	0.789852	54.0728	7.82093	1.47917	0.154091	0.0351239
1325_005__Ap_a_02_3	3	2	10.51	72.57	0	0	4	2.27	0.41	1	14	11	940.88	3.19	2.67	0	0.02	0	0	0	207Pb	1	43Ca	1	43Ca	143.52	87.19	0.7919	39	-	0.0558382	0.0734489	0.227529	0.0241817	0.701949	0.0850309	1.22929	2.14779	136.301	19.6858	1.07151	0.665124	1.15349	0.789852	54.0728	7.82093	1.47917	0.154091	0.0351239
1325_005__Ap_a_02_4	4	1	11.21	67.44	85.26	31.69	4	2.38	0.43	60	116	91	1.56	1.02	1.31	1.12	1.4	1.34	0.91	0		1	43Ca	1	43Ca	6.33	27.44	0.8358	39	-	0.00641407	0.00860378	0.0204276	0.00712715	0.0134528	0.00374487	0	0	38.4542	2.62558	0.204057	0.0620387	0.398542	0.0683898	54.0667	1.28468	1.45097	0.0307391	0.0757791
1325_005__Ap_a_02_4	4	2	14.3	4.55	85.26	31.69	4	2.38	0.43	60	116	91	1.56	1.02	1.31	1.12	1.4	1.34	0.91	0		1	43Ca	1	43Ca	6.33	27.44	0.8358	39	-	0.00641407	0.00860378	0.0204276	0.00712715	0.0134528	0.00374487	0	0	38.4542	2.62558	0.204057	0.0620387	0.398542	0.0683898	54.0667	1.28468	1.45097	0.0307391	0.0757791
1325_005__Ap_a_02_4	4	3	11.86	80.95	85.26	31.69	4	2.38	0.43	60	116	91	1.56	1.02	1.31	1.12	1.4	1.34	0.91	0		1	43Ca	1	43Ca	6.33	27.44	0.8358	39	-	0.00641407	0.00860378	0.0204276	0.00712715	0.0134528	0.00374487	0	0	38.4542	2.62558	0.204057	0.0620387	0.398542	0.0683898	54.0667	1.28468	1.45097	0.0307391	0.0757791
1325_005__Ap_a_02_5	5	1	9.47	56.49	0	0	4	2.14	0.41	15	79	428	21.17	0	0	0	0	0	0	0.01	207Pb	1	43Ca	2	238U	8.17	4.83	0.7215	39	-	0.387389	0.164021	0.0708523	0.0204705	1.486	0.285727	2.56857	5.04345	9.23852	2.28289	1.2697	1.76585	3.77762	1.53185	54.0607	9.92976	0.295527	0.0496649	0
1325_005__Ap_a_02_6	6	1	9.39	67.75	0	0	4	2.35	0.51	0	0	0	0	0	0	0	0	0	0	0	0	0	0	0	0	0	0	0.786	39	-	0	0	0	0	0	0	0	0	0	0	0	0	0	0	0	0	0	0	0
1325_005__Ap_a_02_7	7	1	12.88	42.9	78.88	79.13	4	2.55	0.57	7	12	45	1.65	1.01	0.76	0.27	1.08	3.3	1.3	0.03	206Pb	1	43Ca	1	43Ca	1.22	26.62	0.8211	39	-	0.0461031	0.00604754	0.0272466	0.00410129	0.00216968	0.0021965	0	0	34.8859	2.86364	0.219918	0.0454982	0.518337	0.0475762	54.0486	1.1515	1.47918	0.0259288	0.124034
1325_005__Ap_a_02_7	7	2	13.77	55.58	78.88	79.13	4	2.55	0.57	7	12	45	1.65	1.01	0.76	0.27	1.08	3.3	1.3	0.03	206Pb	1	43Ca	1	43Ca	1.22	26.62	0.8211	39	-	0.0461031	0.00604754	0.0272466	0.00410129	0.00216968	0.0021965	0	0	34.8859	2.86364	0.219918	0.0454982	0.518337	0.0475762	54.0486	1.1515	1.47918	0.0259288	0.124034
1325_005__Ap_a_02_8	8	1	12.74	51.44	0	0	4	2.41	0.54	27	273	0	13.18	0	0	0	0	0	0	0		1	43Ca	1	43Ca	56.85	0	0	39	-	0	0	2.3389	3.67022	58.238	24.5376	77.4254	103.066	0	0	33.7408	69.49	53.7227	51.384	54.0425	30.8226	2.01019	1.22321	0
1325_005__Ap_a_02_8	8	2	13.41	64.15	0	0	4	2.41	0.54	27	273	0	13.18	0	0	0	0	0	0	0		1	43Ca	1	43Ca	56.85	0	0	39	-	0	0	2.3389	3.67022	58.238	24.5376	77.4254	103.066	0	0	33.7408	69.49	53.7227	51.384	54.0425	30.8226	2.01019	1.22321	0
1325_005__Ap_a_02_8	8	3	10.6	68.9	0	0	4	2.41	0.54	27	273	0	13.18	0	0	0	0	0	0	0		1	43Ca	1	43Ca	56.85	0	0	39	-	0	0	2.3389	3.67022	58.238	24.5376	77.4254	103.066	0	0	33.7408	69.49	53.7227	51.384	54.0425	30.8226	2.01019	1.22321	0
1325_005__Ap_a_02_9	9	1	13.82	40.08	31.67	25.71	4	2.09	0.36	67	254	147	1.5	0.85	0.73	0.72	1.57	1.56	1.23	0	208Pb	1	43Ca	1	43Ca	26.49	27.91	0.8546	39	-	0.0240309	0.00704784	0.00412411	0.001961	0.00876835	0.00374284	0.220263	0.159177	35.6319	2.79895	0.206932	0.0545762	0.117756	0.0673032	54.0364	0.8317	1.43476	0.0262977	0.0406802
1325_005__Ap_a_02_9	9	2	11.09	73.99	31.67	25.71	4	2.09	0.36	67	254	147	1.5	0.85	0.73	0.72	1.57	1.56	1.23	0	208Pb	1	43Ca	1	43Ca	26.49	27.91	0.8546	39	-	0.0240309	0.00704784	0.00412411	0.001961	0.00876835	0.00374284	0.220263	0.159177	35.6319	2.79895	0.206932	0.0545762	0.117756	0.0673032	54.0364	0.8317	1.43476	0.0262977	0.0406802
1325_005__Ap_a_02_9	9	3	12.14	78.61	31.67	25.71	4	2.09	0.36	67	254	147	1.5	0.85	0.73	0.72	1.57	1.56	1.23	0	208Pb	1	43Ca	1	43Ca	26.49	27.91	0.8546	39	-	0.0240309	0.00704784	0.00412411	0.001961	0.00876835	0.00374284	0.220263	0.159177	35.6319	2.79895	0.206932	0.0545762	0.117756	0.0673032	54.0364	0.8317	1.43476	0.0262977	0.0406802
1325_005__Ap_a_02_9	9	4	15.85	25.57	31.67	25.71	4	2.09	0.36	67	254	147	1.5	0.85	0.73	0.72	1.57	1.56	1.23	0	208Pb	1	43Ca	1	43Ca	26.49	27.91	0.8546	39	-	0.0240309	0.00704784	0.00412411	0.001961	0.00876835	0.00374284	0.220263	0.159177	35.6319	2.79895	0.206932	0.0545762	0.117756	0.0673032	54.0364	0.8317	1.43476	0.0262977	0.0406802
1325_005__Ap_a_02_10	10	1	15.54	29.98	0	0	4	2.11	0.4	185	7334	750	1.16	0.22	0.02	0.07	101.99	522.19	37.55	0		1	43Ca	1	43Ca	3.68	24.06	0.6907	39	-	0.131952	0.0123708	0.101388	0.00579266	0.653136	0.0288623	0.136267	0.270093	28.4524	1.52879	0.189286	0.09739	0.0434163	0.086096	54.0304	0.546068	1.47711	0.0179151	0.992334
1325_005__Ap_a_02_10	10	2	11.37	65.78	0	0	4	2.11	0.4	185	7334	750	1.16	0.22	0.02	0.07	101.99	522.19	37.55	0		1	43Ca	1	43Ca	3.68	24.06	0.6907	39	-	0.131952	0.0123708	0.101388	0.00579266	0.653136	0.0288623	0.136267	0.270093	28.4524	1.52879	0.189286	0.09739	0.0434163	0.086096	54.0304	0.546068	1.47711	0.0179151	0.992334
1325_005__Ap_a_02_10	10	3	11.81	55.74	0	0	4	2.11	0.4	185	7334	750	1.16	0.22	0.02	0.07	101.99	522.19	37.55	0		1	43Ca	1	43Ca	3.68	24.06	0.6907	39	-	0.131952	0.0123708	0.101388	0.00579266	0.653136	0.0288623	0.136267	0.270093	28.4524	1.52879	0.189286	0.09739	0.0434163	0.086096	54.0304	0.546068	1.47711	0.0179151	0.992334
1325_005__Ap_a_02_11	11	1	14.85	54.16	0	0	3	2.86	0.48	5	90	190	4.6	0	0	0	0	0	0	0.03	206Pb	1	43Ca	1	43Ca	2.1	9.28	0	39	-	0	0	0	0	27.2815	6.92053	0	0	11.4006	9.92532	14.3161	13.2918	32.0477	18.4533	54.0186	16.7426	2.37828	0.607724	0.0975156
1325_005__Ap_a_02_11	11	2	15.12	51.42	0	0	3	2.86	0.48	5	90	190	4.6	0	0	0	0	0	0	0.03	206Pb	1	43Ca	1	43Ca	2.1	9.28	0	39	-	0	0	0	0	27.2815	6.92053	0	0	11.4006	9.92532	14.3161	13.2918	32.0477	18.4533	54.0186	16.7426	2.37828	0.607724	0.0975156
1325_005__Ap_a_02_12	12	1	12.57	64.28	0	0	4	2.31	0.4	0	0	0	0	0	0	0	0	0	0	0	0	0	0	0	0	0	0	0.8535	39	-	0	0	0	0	0	0	0	0	0	0	0	0	0	0	0	0	0	0	0
1325_005__Ap_a_02_13	13	1	11.79	74.7	0	0	4	2.34	0.45	0	24	119	27.39	0	0	0	0	0	0	0.02	208Pb	1	43Ca	1	43Ca	1.57	10.6	0	39	-	0	0	0	0	12.834	6.52776	0	0	13.8	31.3231	9.99262	24.2933	29.5954	27.9505	53.9638	33.15	2.95192	1.73426	0.145687
1325_005__Ap_a_02_13	13	2	12.72	40.82	0	0	4	2.34	0.45	0	24	119	27.39	0	0	0	0	0	0	0.02	208Pb	1	43Ca	1	43Ca	1.57	10.6	0	39	-	0	0	0	0	12.834	6.52776	0	0	13.8	31.3231	9.99262	24.2933	29.5954	27.9505	53.9638	33.15	2.95192	1.73426	0.145687
1325_005__Ap_a_02_13	13	3	13.46	33.96	0	0	4	2.34	0.45	0	24	119	27.39	0	0	0	0	0	0	0.02	208Pb	1	43Ca	1	43Ca	1.57	10.6	0	39	-	0	0	0	0	12.834	6.52776	0	0	13.8	31.3231	9.99262	24.2933	29.5954	27.9505	53.9638	33.15	2.95192	1.73426	0.145687
1325_005__Ap_a_02_14	14	1	11.46	68.21	60.96	99.32	4	2.06	0.32	8	35	86	1.28	0.85	0.81	1.19	1.53	1	0.65	0.02	207Pb	1	43Ca	1	43Ca	3.34	28.69	0.8554	39	-	0.0094842	0.00885093	0.012593	0.00243913	0	0	0	0	39.4775	1.88151	0.111594	0.0477479	0.0710277	0.0657378	53.9364	0.880844	1.4534	0.0216008	0.050894
1325_005__Ap_a_02_14	14	2	14.72	23.69	60.96	99.32	4	2.06	0.32	8	35	86	1.28	0.85	0.81	1.19	1.53	1	0.65	0.02	207Pb	1	43Ca	1	43Ca	3.34	28.69	0.8554	39	-	0.0094842	0.00885093	0.012593	0.00243913	0	0	0	0	39.4775	1.88151	0.111594	0.0477479	0.0710277	0.0657378	53.9364	0.880844	1.4534	0.0216008	0.050894
1325_005__Ap_a_02_15	15	1	6.14	54.91	0	0	4	2.57	0.45	34	2002	0	54.59	0	0	0	0	0	0	0.01	206Pb	1	43Ca	2	232Th	13.71	6.17	0	39	-	0.158213	0.38641	1.22014	0.209829	17.2326	2.78445	0	0	11.4987	3.05647	0	0	5.20642	4.73334	53.9091	8.03335	1.63367	0.249033	0.573317
1325_005__Ap_a_02_16	16	1	13.04	51.44	0	0	4	1.93	0.51	9	1	0	27.01	0.07	0.05	0.68	3.95	0.28	5.78	0.01	208Pb	1	43Ca	1	43Ca	12.08	26.9	0.8374	39	-	0.0349148	0.00631386	0.00661829	0.00357177	0.0274604	0.0108342	0	0	38.1625	1.4683	0.206829	0.0897442	0.442131	0.0654423	53.8818	0.840106	1.45154	0.0210927	0.0530178
1325_005__Ap_a_02_17	17	1	10.75	62.6	54.61	46.53	3	2.54	0.47	32	2	95	2.34	0.69	0.83	1.53	1.51	0.72	1.21	0		1	43Ca	1	43Ca	4.21	23.96	0.8189	39	-	0.084445	0.00718144	0.049964	0.00545269	0.0157492	0.00220768	0.0853174	0.213611	35.8475	0.812658	0.177853	0.0699363	0.158594	0.0627226	53.8545	0.857455	1.50079	0.0214813	0.407269
1325_005__Ap_a_02_18	18	1	13.32	42.02	0	0	4	2.79	0.47	5	60	60	303.09	0	0	0	0	0	0	0.01	206Pb	1	43Ca	1	43Ca	6.04	5.53	0	39	-	0.094868	0.271012	2.78525	0.209618	44.7881	9.74278	6.17877	5.94727	11.2532	2.15178	0	0	3.45799	1.67862	53.8272	4.73025	1.93008	0.253953	0.0882605
1325_005__Ap_a_02_19	19	1	12.58	80.39	27.46	36.42	4	2.87	0.49	22	13	61	1.97	1.02	0.98	1.23	0.96	0.77	0.85	0.01	207Pb	1	43Ca	1	43Ca	3.52	31.07	0.8201	39	-	0.0683603	0.01003	0.0299667	0.00516149	0.00208619	0.00247772	0	0	57.451	2.03552	0.093967	0.0736978	0.658997	0.0590558	54.0793	0.725527	1.41468	0.0214342	0.0856288
1325_005__Ap_a_02_19	19	2	14.76	27.65	27.46	36.42	4	2.87	0.49	22	13	61	1.97	1.02	0.98	1.23	0.96	0.77	0.85	0.01	207Pb	1	43Ca	1	43Ca	3.52	31.07	0.8201	39	-	0.0683603	0.01003	0.0299667	0.00516149	0.00208619	0.00247772	0	0	57.451	2.03552	0.093967	0.0736978	0.658997	0.0590558	54.0793	0.725527	1.41468	0.0214342	0.0856288
1325_005__Ap_a_02_19	19	3	11.61	73.84	27.46	36.42	4	2.87	0.49	22	13	61	1.97	1.02	0.98	1.23	0.96	0.77	0.85	0.01	207Pb	1	43Ca	1	43Ca	3.52	31.07	0.8201	39	-	0.0683603	0.01003	0.0299667	0.00516149	0.00208619	0.00247772	0	0	57.451	2.03552	0.093967	0.0736978	0.658997	0.0590558	54.0793	0.725527	1.41468	0.0214342	0.0856288
1325_005__Ap_a_02_20	20	1	8.99	74.26	0	0	4	2.84	0.42	0	220	0	64.47	0	0	0	0	0	0	0.03	207Pb	1	43Ca	2	232Th	10.11	12.05	0.7078	39	-	0	0	0	0	25.96	3.74268	0	0	13.5373	3.93874	0.966559	3.17464	4.76402	3.15454	54.0733	8.13691	1.91053	0.254592	0
1325_005__Ap_a_02_20	20	2	13.22	72.26	0	0	4	2.84	0.42	0	220	0	64.47	0	0	0	0	0	0	0.03	207Pb	1	43Ca	2	232Th	10.11	12.05	0.7078	39	-	0	0	0	0	25.96	3.74268	0	0	13.5373	3.93874	0.966559	3.17464	4.76402	3.15454	54.0733	8.13691	1.91053	0.254592	0
1325_005__Ap_a_02_21	21	1	16.51	43.36	54.38	11.28	4	2.86	0.63	107	34	39	4.16	0.96	1.32	1.26	1.06	0.71	0.59	0	206Pb	1	43Ca	1	43Ca	9.45	24.51	0.8472	39	-	0.0284601	0.00791494	0.01438	0.00388241	0.0027191	0.00206703	0	0	42.5926	1.20967	0.139871	0.0824793	0.181846	0.0610399	54.0673	0.735363	1.37846	0.0195065	0.0989019
1325_005__Ap_a_02_21	21	2	9.32	72.48	54.38	11.28	4	2.86	0.63	107	34	39	4.16	0.96	1.32	1.26	1.06	0.71	0.59	0	206Pb	1	43Ca	1	43Ca	9.45	24.51	0.8472	39	-	0.0284601	0.00791494	0.01438	0.00388241	0.0027191	0.00206703	0	0	42.5926	1.20967	0.139871	0.0824793	0.181846	0.0610399	54.0673	0.735363	1.37846	0.0195065	0.0989019
1325_005__Ap_a_02_21	21	3	10.81	67.37	54.38	11.28	4	2.86	0.63	107	34	39	4.16	0.96	1.32	1.26	1.06	0.71	0.59	0	206Pb	1	43Ca	1	43Ca	9.45	24.51	0.8472	39	-	0.0284601	0.00791494	0.01438	0.00388241	0.0027191	0.00206703	0	0	42.5926	1.20967	0.139871	0.0824793	0.181846	0.0610399	54.0673	0.735363	1.37846	0.0195065	0.0989019
1325_005__Ap_a_02_21	21	4	15.46	59.57	54.38	11.28	4	2.86	0.63	107	34	39	4.16	0.96	1.32	1.26	1.06	0.71	0.59	0	206Pb	1	43Ca	1	43Ca	9.45	24.51	0.8472	39	-	0.0284601	0.00791494	0.01438	0.00388241	0.0027191	0.00206703	0	0	42.5926	1.20967	0.139871	0.0824793	0.181846	0.0610399	54.0673	0.735363	1.37846	0.0195065	0.0989019
1325_005__Ap_a_02_22	22	1	15.23	36.15	0	0	4	1.98	0.38	4	10	0	190.35	0	0	0	0	0	0	0	208Pb	1	43Ca	2	206Pb	22.8	2.12	0.8718	39	-	0.082308	0.275632	0.116581	0.0263849	1.01972	0.208041	2.21613	5.5614	2.84604	1.88804	0.253272	2.28572	4.8209	1.75182	54.0613	12.951	0.968405	0.200519	0.0143764
1325_005__Ap_a_02_23	23	1	9.12	74.94	0	0	4	2.41	0.38	9	105	299	62.65	0	0	0	0	0	0	0.01	206Pb	1	43Ca	1	43Ca	4.86	8.59	0.7258	39	-	0.129413	0.836328	0.0513848	0.0582587	6.7202	1.35403	0.796756	18.823	15.4962	4.35762	0	0	0	0	54.0553	10.7481	4.23945	0.803447	0.0506133
1325_005__Ap_a_02_23	23	2	13.74	71.55	0	0	4	2.41	0.38	9	105	299	62.65	0	0	0	0	0	0	0.01	206Pb	1	43Ca	1	43Ca	4.86	8.59	0.7258	39	-	0.129413	0.836328	0.0513848	0.0582587	6.7202	1.35403	0.796756	18.823	15.4962	4.35762	0	0	0	0	54.0553	10.7481	4.23945	0.803447	0.0506133
1325_005__Ap_a_02_24	24	1	12.16	83.59	21.24	8.24	4	2.01	0.37	133	1195	179	1.37	1.23	0.94	1.02	1.26	1.22	1.15	0		1	43Ca	1	43Ca	1.12	25.37	0.846	39	-	0.000402735	0.00512576	0.00205156	0.00174618	0.00190228	0.00242371	0	0	44.6275	2.08567	0.117288	0.0616693	0.313247	0.0532818	54.0493	1.40465	1.45849	0.0340452	0.0129006
1325_005__Ap_a_02_24	24	2	13.94	31.54	21.24	8.24	4	2.01	0.37	133	1195	179	1.37	1.23	0.94	1.02	1.26	1.22	1.15	0		1	43Ca	1	43Ca	1.12	25.37	0.846	39	-	0.000402735	0.00512576	0.00205156	0.00174618	0.00190228	0.00242371	0	0	44.6275	2.08567	0.117288	0.0616693	0.313247	0.0532818	54.0493	1.40465	1.45849	0.0340452	0.0129006
1325_005__Ap_a_02_24	24	3	13.67	65.05	21.24	8.24	4	2.01	0.37	133	1195	179	1.37	1.23	0.94	1.02	1.26	1.22	1.15	0		1	43Ca	1	43Ca	1.12	25.37	0.846	39	-	0.000402735	0.00512576	0.00205156	0.00174618	0.00190228	0.00242371	0	0	44.6275	2.08567	0.117288	0.0616693	0.313247	0.0532818	54.0493	1.40465	1.45849	0.0340452	0.0129006
1325_005__Ap_a_02_24	24	4	14.13	38.26	21.24	8.24	4	2.01	0.37	133	1195	179	1.37	1.23	0.94	1.02	1.26	1.22	1.15	0		1	43Ca	1	43Ca	1.12	25.37	0.846	39	-	0.000402735	0.00512576	0.00205156	0.00174618	0.00190228	0.00242371	0	0	44.6275	2.08567	0.117288	0.0616693	0.313247	0.0532818	54.0493	1.40465	1.45849	0.0340452	0.0129006
1325_005__Ap_a_02_24	24	5	13.53	53	21.24	8.24	4	2.01	0.37	133	1195	179	1.37	1.23	0.94	1.02	1.26	1.22	1.15	0		1	43Ca	1	43Ca	1.12	25.37	0.846	39	-	0.000402735	0.00512576	0.00205156	0.00174618	0.00190228	0.00242371	0	0	44.6275	2.08567	0.117288	0.0616693	0.313247	0.0532818	54.0493	1.40465	1.45849	0.0340452	0.0129006
1325_005__Ap_a_02_24	24	6	12.75	50.22	21.24	8.24	4	2.01	0.37	133	1195	179	1.37	1.23	0.94	1.02	1.26	1.22	1.15	0		1	43Ca	1	43Ca	1.12	25.37	0.846	39	-	0.000402735	0.00512576	0.00205156	0.00174618	0.00190228	0.00242371	0	0	44.6275	2.08567	0.117288	0.0616693	0.313247	0.0532818	54.0493	1.40465	1.45849	0.0340452	0.0129006
1325_005__Ap_a_02_24	24	7	14.71	62.28	21.24	8.24	4	2.01	0.37	133	1195	179	1.37	1.23	0.94	1.02	1.26	1.22	1.15	0		1	43Ca	1	43Ca	1.12	25.37	0.846	39	-	0.000402735	0.00512576	0.00205156	0.00174618	0.00190228	0.00242371	0	0	44.6275	2.08567	0.117288	0.0616693	0.313247	0.0532818	54.0493	1.40465	1.45849	0.0340452	0.0129006
1325_005__Ap_a_02_24	24	8	10.27	74.19	21.24	8.24	4	2.01	0.37	133	1195	179	1.37	1.23	0.94	1.02	1.26	1.22	1.15	0		1	43Ca	1	43Ca	1.12	25.37	0.846	39	-	0.000402735	0.00512576	0.00205156	0.00174618	0.00190228	0.00242371	0	0	44.6275	2.08567	0.117288	0.0616693	0.313247	0.0532818	54.0493	1.40465	1.45849	0.0340452	0.0129006
1325_005__Ap_a_02_24	24	9	13.43	47.11	21.24	8.24	4	2.01	0.37	133	1195	179	1.37	1.23	0.94	1.02	1.26	1.22	1.15	0		1	43Ca	1	43Ca	1.12	25.37	0.846	39	-	0.000402735	0.00512576	0.00205156	0.00174618	0.00190228	0.00242371	0	0	44.6275	2.08567	0.117288	0.0616693	0.313247	0.0532818	54.0493	1.40465	1.45849	0.0340452	0.0129006
1325_005__Ap_a_02_24	24	10	13.68	55.08	21.24	8.24	4	2.01	0.37	133	1195	179	1.37	1.23	0.94	1.02	1.26	1.22	1.15	0		1	43Ca	1	43Ca	1.12	25.37	0.846	39	-	0.000402735	0.00512576	0.00205156	0.00174618	0.00190228	0.00242371	0	0	44.6275	2.08567	0.117288	0.0616693	0.313247	0.0532818	54.0493	1.40465	1.45849	0.0340452	0.0129006
1325_005__Ap_a_02_25	25	1	13.14	40.57	0	0	4	1.79	0.41	1	1	16	245.34	0	0	0	0	0	0	0		1	43Ca	2	43Ca	3.04	5.27	0.6887	39	-	0.213775	0.135136	0.0268279	0.00767879	12.6237	1.7475	0	0	6.72968	1.63129	0.699451	1.12152	3.10566	0.934589	54.0432	6.80071	0.729069	0.0853887	0.0467833
1325_005__Ap_a_02_26	26	1	12.12	71.39	61.1	36.03	4	2.28	0.5	32	1	22	1.2	1.08	1.43	0.98	1.8	2.44	1.08	0.01	206Pb	1	43Ca	2	207Pb	3.18	24.97	0.8595	39	-	0.0386735	0.0134965	0.00062574	0.00668776	0.0120512	0.01838	0.120632	0.175101	42.839	1.52086	0.206104	0.097734	0.0273228	0.0377314	54.0372	0.900513	1.47009	0.0321943	0.0523244
1325_005__Ap_a_02_27	27	1	10.17	62.36	0	0	4	2.01	0.57	1	135	141	71.8	0	0	0	0	0	0	0.12	207Pb	1	43Ca	1	43Ca	1.44	9.87	0	39	-	0.148318	0.33068	0.0896502	0.0262801	7.15914	5.69189	3.74954	8.38141	12.305	4.03365	3.80669	3.64996	3.89854	2.24493	54.0312	7.67618	4.72674	0.485675	0.186876
1325_005__Ap_a_02_27	27	2	13.01	52.18	0	0	4	2.01	0.57	1	135	141	71.8	0	0	0	0	0	0	0.12	207Pb	1	43Ca	1	43Ca	1.44	9.87	0	39	-	0.148318	0.33068	0.0896502	0.0262801	7.15914	5.69189	3.74954	8.38141	12.305	4.03365	3.80669	3.64996	3.89854	2.24493	54.0312	7.67618	4.72674	0.485675	0.186876
1325_005__Ap_a_02_28	28	1	12.35	62.2	89.28	87.16	4	2.29	0.34	70	203	116	12.63	0.02	0.01	0.02	7.15	3.37	3.76	0		1	43Ca	1	43Ca	2.93	22.08	0.8486	39	-	0	0	0.0156052	0.00366729	0.00191453	0.00797998	0	0	41.2699	1.58157	0.164	0.0610426	0.192113	0.0560391	54.0252	1.24965	1.4286	0.0298338	0.0653028
1325_005__Ap_a_02_28	28	2	11.89	48.53	89.28	87.16	4	2.29	0.34	70	203	116	12.63	0.02	0.01	0.02	7.15	3.37	3.76	0		1	43Ca	1	43Ca	2.93	22.08	0.8486	39	-	0	0	0.0156052	0.00366729	0.00191453	0.00797998	0	0	41.2699	1.58157	0.164	0.0610426	0.192113	0.0560391	54.0252	1.24965	1.4286	0.0298338	0.0653028
1325_005__Ap_a_02_28	28	3	13.07	50.33	89.28	87.16	4	2.29	0.34	70	203	116	12.63	0.02	0.01	0.02	7.15	3.37	3.76	0		1	43Ca	1	43Ca	2.93	22.08	0.8486	39	-	0	0	0.0156052	0.00366729	0.00191453	0.00797998	0	0	41.2699	1.58157	0.164	0.0610426	0.192113	0.0560391	54.0252	1.24965	1.4286	0.0298338	0.0653028
1325_005__Ap_a_02_28	28	4	11.58	65.92	89.28	87.16	4	2.29	0.34	70	203	116	12.63	0.02	0.01	0.02	7.15	3.37	3.76	0		1	43Ca	1	43Ca	2.93	22.08	0.8486	39	-	0	0	0.0156052	0.00366729	0.00191453	0.00797998	0	0	41.2699	1.58157	0.164	0.0610426	0.192113	0.0560391	54.0252	1.24965	1.4286	0.0298338	0.0653028
1325_005__Ap_a_02_28	28	5	11.67	46.66	89.28	87.16	4	2.29	0.34	70	203	116	12.63	0.02	0.01	0.02	7.15	3.37	3.76	0		1	43Ca	1	43Ca	2.93	22.08	0.8486	39	-	0	0	0.0156052	0.00366729	0.00191453	0.00797998	0	0	41.2699	1.58157	0.164	0.0610426	0.192113	0.0560391	54.0252	1.24965	1.4286	0.0298338	0.0653028
1325_005__Ap_a_02_29	29	1	14.08	80.2	66.16	195.44	4	2.49	0.46	9	5	85	1.83	0.59	0.62	0.3	5.67	7.43	1.77	0	207Pb	1	43Ca	1	43Ca	3.68	26.27	0.8447	39	-	0.0448828	0.011023	0.0118828	0.00389128	0.00531216	0.0037492	0.0623443	0.20319	42.1692	1.27347	0.188112	0.0643483	0.204546	0.0638022	54.0032	1.02253	1.44543	0.028913	0.102379
1325_005__Ap_a_02_29	29	2	13.72	45.6	66.16	195.44	4	2.49	0.46	9	5	85	1.83	0.59	0.62	0.3	5.67	7.43	1.77	0	207Pb	1	43Ca	1	43Ca	3.68	26.27	0.8447	39	-	0.0448828	0.011023	0.0118828	0.00389128	0.00531216	0.0037492	0.0623443	0.20319	42.1692	1.27347	0.188112	0.0643483	0.204546	0.0638022	54.0032	1.02253	1.44543	0.028913	0.102379
1325_005__Ap_a_02_30	30	1	12.73	37.24	28.15	42.36	4	2.67	0.51	17	129	321	1.2	1.08	1.09	0.96	1.22	1.44	1.03	0	208Pb	1	43Ca	1	43Ca	4.54	24.13	0.8274	39	-	0.0550288	0.00827532	0.0213329	0.00567126	0.00370643	0.00263017	0.282087	0.16554	39.613	1.24973	0.173647	0.0544879	0.418181	0.065281	53.9748	1.30689	1.49632	0.0329915	0.0727704
1325_005__Ap_a_02_30	30	2	11.28	73.12	28.15	42.36	4	2.67	0.51	17	129	321	1.2	1.08	1.09	0.96	1.22	1.44	1.03	0	208Pb	1	43Ca	1	43Ca	4.54	24.13	0.8274	39	-	0.0550288	0.00827532	0.0213329	0.00567126	0.00370643	0.00263017	0.282087	0.16554	39.613	1.24973	0.173647	0.0544879	0.418181	0.065281	53.9748	1.30689	1.49632	0.0329915	0.0727704
1325_005__Ap_a_02_31	31	1	13.12	62.52	111.15	91	4	2.7	0.46	8	27	39	1.72	0.87	1.02	1.24	0.89	0.79	0.76	0	206Pb	1	43Ca	1	43Ca	4.08	30.05	0.8442	39	-	0.0538873	0.00618754	0.00806428	0.00300417	0.000577717	0.00131008	0.00681403	0.181521	41.4168	2.22524	0.201793	0.0655649	0.302299	0.059722	53.9464	1.00337	1.46231	0.0229727	0.0639534
1325_005__Ap_a_02_32	32	1	12.51	70.27	39.42	42.64	3	3.26	0.87	42	80	26	1.72	1.04	0.98	1.38	0.75	0.57	0.72	0	208Pb	1	43Ca	1	43Ca	6.45	28.22	0.6595	39	-	0.0714022	0.010333	0.101191	0.0125062	0.00288821	0.00313875	0	0	51.7477	1.99749	0.222252	0.0483089	2.69344	0.089562	53.918	1.00998	1.47527	0.0255309	0.0633567
1325_005__Ap_a_02_32	32	2	13.99	64.91	39.42	42.64	3	3.26	0.87	42	80	26	1.72	1.04	0.98	1.38	0.75	0.57	0.72	0	208Pb	1	43Ca	1	43Ca	6.45	28.22	0.6595	39	-	0.0714022	0.010333	0.101191	0.0125062	0.00288821	0.00313875	0	0	51.7477	1.99749	0.222252	0.0483089	2.69344	0.089562	53.918	1.00998	1.47527	0.0255309	0.0633567
1325_005__Ap_a_02_33	33	1	13.74	85.97	0	0	3	2.37	0.41	7	43	51	385.47	0	0	0	0	0	0	0.02	208Pb	1	43Ca	1	43Ca	5.58	8.03	0.9221	39	-	0.172587	0.327733	0.031874	0.0108511	5.71806	1.1455	5.0509	10.8872	12.3391	3.1801	2.19449	2.61466	6.56145	4.58702	53.8897	8.35172	0.631885	0.133504	0
1325_005__Ap_a_02_33	33	2	14.48	60.55	0	0	3	2.37	0.41	7	43	51	385.47	0	0	0	0	0	0	0.02	208Pb	1	43Ca	1	43Ca	5.58	8.03	0.9221	39	-	0.172587	0.327733	0.031874	0.0108511	5.71806	1.1455	5.0509	10.8872	12.3391	3.1801	2.19449	2.61466	6.56145	4.58702	53.8897	8.35172	0.631885	0.133504	0
1325_005__Ap_a_02_34	34	1	12.44	62.58	26.85	15.45	4	2.52	0.57	64	478	114	1.84	1.04	0.57	0.8	1.22	1.3	1	0		1	43Ca	1	43Ca	2.31	27.62	0.8394	39	-	0.0388176	0.00561172	0.00720226	0.00286411	0.00318411	0.00167927	0	0	37.8639	2.09857	0.183972	0.0863451	0.268179	0.0511801	53.8614	0.822237	1.4242	0.0196673	0.0765812
1325_005__Ap_a_02_34	34	2	12.47	67.03	26.85	15.45	4	2.52	0.57	64	478	114	1.84	1.04	0.57	0.8	1.22	1.3	1	0		1	43Ca	1	43Ca	2.31	27.62	0.8394	39	-	0.0388176	0.00561172	0.00720226	0.00286411	0.00318411	0.00167927	0	0	37.8639	2.09857	0.183972	0.0863451	0.268179	0.0511801	53.8614	0.822237	1.4242	0.0196673	0.0765812
1325_005__Ap_a_02_34	34	3	10	68.24	26.85	15.45	4	2.52	0.57	64	478	114	1.84	1.04	0.57	0.8	1.22	1.3	1	0		1	43Ca	1	43Ca	2.31	27.62	0.8394	39	-	0.0388176	0.00561172	0.00720226	0.00286411	0.00318411	0.00167927	0	0	37.8639	2.09857	0.183972	0.0863451	0.268179	0.0511801	53.8614	0.822237	1.4242	0.0196673	0.0765812
1325_005__Ap_a_02_34	34	4	13.06	46.13	26.85	15.45	4	2.52	0.57	64	478	114	1.84	1.04	0.57	0.8	1.22	1.3	1	0		1	43Ca	1	43Ca	2.31	27.62	0.8394	39	-	0.0388176	0.00561172	0.00720226	0.00286411	0.00318411	0.00167927	0	0	37.8639	2.09857	0.183972	0.0863451	0.268179	0.0511801	53.8614	0.822237	1.4242	0.0196673	0.0765812
1325_005__Ap_a_02_35	35	1	14.3	59.42	0	0	1	2.26	0.52	0	0	0	0	0	0	0	0	0	0	0	0	0	0	0	0	0	0	0.8461	39	-	0	0	0	0	0	0	0	0	0	0	0	0	0	0	0	0	0	0	0
Results from Cleber's Lab
M02			M07			M08			M11			M28			M12
lengh	angle		lenght	angle		lenght	angle		lenght	angle		lenght	angle		lenght	angle
13.69	7.22		11.43	55.4		11.21	44.84		15.36	46.99		12.91	60.83		13.68	32.05
14.17	35.55		11.07	57.93		15.14	27.72		10.18	25.27		13.95	2.78		12.59	51.7
13.3	45.86		14.46	60.95		14.84	49.96		11.21	6.58		12.83	43.12		12.19	51.43
13.76	57.01		10.27	54.74		12.53	64.03		10.99	77.42		7.25	24.05		12.29	7.37
13.35	24.16		8.37	8.47		14.82	71.76		11.42	11.58		12.21	77.13		8.66	7.56
14.2	60.39		9.45	81.39		17.29	65.58		7.78	22.04		14.19	20.28		15.61	54.99
12.46	86.49		11.18	18.03		13.75	66.44		12.85	9.16		12.33	20.45		11.2	19.5
15.53	65.81		14.57	56.18		10.91	51.71		9.62	61.6		13.89	67.51		13.21	51.76
10.64	9.8		8.02	76.56		11.53	54.44		6.14	4.32		17.13	18.92		11.74	81.61
13.78	68.66		11.79	23.23		15.74	13.41		11.51	21.3		7.31	80.12		12.77	84.1
13.37	49.08		7.88	3.32		14.58	58.84		9.23	56.67		13.08	47.21		14.2	60.98
15.14	48.22		14.74	63.16		11.71	74.86		10.67	77.66		13.43	77.81		13.65	44.12
12.33	4.69		12.16	73.17		12.67	78.69		11.93	2.81		6.32	82.51		14.97	24.29
14.63	69.86		12.72	21		10.47	45.22		13.42	27.34		15.89	28.75		12.28	90.29
13.53	2.12		13.27	65.39		13.82	39.07		13.56	13.51		17.18	34.79		9.21	87.27
14.35	46.4		11.96	37.02		7.33	10.91		10.96	53.65		13.21	21.37		14.49	17.33
8.85	53.28		14.64	47.25		15.72	50.11		13.03	13.23		14.94	71.41		12.75	77.08
11.25	44.8		13.27	45.07		14.11	50.86		12.9	18.93		15.81	63.24		11.38	62.07
15.83	13.05		8.05	28.15		14.21	29.15		6.92	7.29		9.93	64.87		12.48	87.64
16.09	54.16		11.7	76.48		12.72	75.53		15.98	36.87		12.7	15.84		12.81	37.92
13.61	71.51		12.01	54.46		15.26	65.73		13.45	70.99		16.33	51.87		15.37	67.77
14.18	20.16		14.16	12.65		14.48	66.11		10.19	53.75		15.48	21.08		12.76	70.14
12.56	80.11		10.85	14.67		13.23	66.97		15.77	41.07		8.76	84.18		11.53	67.59
12.78	27.65		10.86	73.59		14.53	34.21		10.09	76.76		15.65	13.01		12.07	49.61
14.51	63.76		15.03	29.03		14.97	86.82		10.89	14.71		13.01	51.06		14.48	45.8
14.33	53.17		8.35	53.33		9.31	67.3		12.01	47.04		14.24	50.56		13.29	48.16
12.98	29.16		9.94	82.99		15.21	83.49		13.07	20.53		14.49	84.11		13.16	58.53
9.75	60.88					13.62	85.71		14.51	24.99		12.02	84.98		12.29	74.53
13.17	78.69					12.78	45.57		11.28	76.27		15.96	54.16		12.53	44.75
14.89	49.21					6.87	52.42		15.1	86.11		15.48	18.43		13.01	66.77
13.25	62.19					15.95	45.78		11.77	38.51		12.27	71.32		12.91	58.91
14.16	42.63					15.79	35.62		11.56	86.41		13.51	25.88		13.91	45.98
11.14	80.39					13.34	70.52		14.09	78.32		15.62	47.73		13.21	39.82
14.45	14.11					9.98	54.46		13.52	89.02		11.29	63.97		13.38	42.22
11.26	41.67					16.45	38.91		11.99	79.58		15.83	47.8		12.07	75.23
15.97	61.22					15.86	41.63		12.9	77.08		8.41	59.47		12.38	70.91
11.95	63.08					10.71	46.01		13.45	0.26		12.33	43.73		12.61	68.91
13.11	31.72					13.73	7.11		10.98	20.56		8.68	87.06		12.57	1.58
11.55	19.49					13.66	69.87		15.77	43.15		9.21	43.89		13.42	27.94
12.35	40.91					15.81	10.27		13.06	40.09		6.58	86.47		12.57	80.27
11.26	4.6					16.31	4.75		11.31	40.74		13.86	69.82		11.94	73.28
12.9	8.91					10.97	12.11		14.52	37.72		14.34	41.67		11.91	4.31
						13.02	50.8		8.33	70.12		14.46	4.39		14.39	23.43
						13.54	56.31		11.48	74.15		16.47	41.73		13.65	62.1
						13	59.66		12.76	47.54		16.17	17.92		11.58	73.73
						14.44	93.71		12.99	65.67		14.84	65.33		12.02	81.95
						13.23	89.19		13.39	35.39		15.59	38.01		12.41	1.18
						13	68.92		11.11	43.87		11.59	78.24		13.92	71.21
						10.42	74.36		12.07	68.35		13.29	81.9		13.56	40.02
						14.68	10.72		13.95	64.89		11.39	44.83		13.26	70.87
						13.81	39.34		13.98	34.48		15.19	83.69		12.83	34.92
						15.03	48.86		9.41	63.43		11.28	44.09		13.36	25.58
						13.53	59.68		11.89	28.15		12.96	70.35		13.07	65.93
						14	19.89		15.15	8.66		15.09	41.63		13.08	11.46
						13.98	12.08		13.04	81.49		14.44	14.19		14.31	51.16
						13.49	82.45		11.72	70.95		15.48	73.75		13.55	37.78
						15.86	2.51		11.47	12.51		6.58	32.21		13.46	45.73
						15.78	68.16		11.41	49.42		15.79	24.11		13	78.68
						14.49	87.74		15.34	37.11		13.21	43.21		12.47	67.38
						14.13	66.96		9.54	29.85		16.05	28.37		15.24	74.09
						12.52	85.32		11.52	90		13.37	50.74		13.62	23.67
						13.68	30.35		14.59	28.01		14.79	13.08		15.41	68.14
						16.73	56.86		10.79	70.82		10.75	78.54		16.17	127.3
						11.32	73.77		15.47	30.66		5.86	80.97		11.32	73.77
						10.17	36.59		12.45	31.13		16.52	74.47		10.17	36.59
						14.58	57.35		11.07	3.37		14.08	60.26		14.58	57.35
						13.62	49.34		11.22	53.96		15.79	85.51		13.62	49.34
						14.39	58.46		11.94	7.57		13.31	81.76		14.39	58.46
						12.83	92.48		11.92	41.65		15.62	57.32		12.83	92.48
						14.15	69.19		13.29	63.57		9.99	85.98		14.15	69.19
						15.64	39.37		11.91	29.51		7.82	66.8		15.64	39.37
						12.06	48.21		10.67	2.2		13.99	43.88		12.06	48.21
						13.41	93.47		12.11	77.18		11.64	52.79		13.41	93.47
						13.68	40.13		10.31	24.79		15.34	59.22		13.68	40.13
						14.7	50.61		15.06	6.36		14.24	59.9		14.7	50.61
						12.29	69.03		7.42	60.73		15.39	70.02		12.29	69.03
						13.31	23.33		14.55	69.51		11.17	63.22		13.31	23.33
						12.53	45.58		12.79	36.54		14.65	85.88		12.53	45.58
						13.72	73.05		9.67	17.45		8.37	0.17		13.72	73.05
						13.96	37.73		12.62	47.72					13.96	37.73
						16.03	27.91		13.95	10.92					16.03	27.91
						12.82	58.41		10.56	24.98					12.82	58.41
						13.54	51.12		11.81	74.64					13.54	51.12
						13.54	71.46		12.56	10.54					13.54	71.46
						14.33	26.3		11.08	58.15					14.33	26.3
						13.55	68.19		13.4	48.58					13.55	68.19
						11.95	57.78		11.22	42.27					11.95	57.78
						14.71	20.04		11	72.51					14.71	20.04
						11.91	57.97		13.09	66.16					11.91	57.97
						13.89	13.03		14.48	83.38					13.89	13.03
						13.7	18.64		9.88	76.45					13.7	18.64
						13.95	36.26		12.83	4.83					13.95	36.26
						14.35	75.98		14.29	76.98					14.35	75.98
						13.39	68.68		12.61	16.59					13.39	68.68
						14.44	55.69		14.44	22.59					14.44	55.69
						12.9	75.6		12.96	31.63					12.9	75.6
						12.84	58.31		12.96	7.8					12.84	58.31
						13.54	62.22		12.96	65.68					13.54	62.22
						11.26	6.1		15.75	81.03					11.26	6.1
						10.87	60.3		13.24	21.32					10.87	60.3
						12.74	83.42		13.64	37.27					12.74	83.42
						13.01	34.99		16.1	22.08					13.01	34.99
						11.35	67.57		12.22	63.67					11.35	67.57
						13.83	71.93		9.34	78.11					13.83	71.93
						13.92	53.29		10.84	59.35					13.92	53.29
						8.95	95.17		13.41	20.68					8.95	95.17
						11.78	42.97		13.13	46.79					11.78	42.97
						12.06	61.84		13.89	49.99					12.06	61.84
						14.15	68.46		10.83	66.32					14.15	68.46
						13.73	25.99		11.53	28.47					13.73	25.99
						12.01	72.98								12.01	72.98
						13.13	28.16								13.13	28.16
						11.94	71.96								11.94	71.96
						14.49	86.32								14.49	86.32
						14.12	58.25								14.12	58.25
						14.75	40.66								14.75	40.66
						12.15	1.84								12.15	1.84
						14.33	48.69								14.33	48.69
[truncated: 273 more columns]
